# Supplementary material for: Knockout CsRBOH5.1 causes global decrease of H3K4me3 on genes during recovery after cold stress acclimation, leading to acclimation failure
Source: Research Square preprint supplement (doi:10.21203/rs.3.rs-3226653/v1), 2023-08-03
Supplement: Supplementary file 1 [file Extended Data Table 1.xlsx]

## Sheet: Table 1a
Table 1a Summary of RNA_seq data.
NO.	Sample name	Total reads	Mapped reads	Unique mapped reads	Map rate	Unique map rate
1	Csrboh5.1_CK48h_1_RNA_seq	39482042	34325078	28650709	86.9385	72.5664
2	Csrboh5.1_CK48h_2_RNA_seq	43090390	38878862	35837568	90.2263	83.1684
3	Csrboh5.1_CK48h_3_RNA_seq	38387094	34508183	31169974	89.8953	81.1991
4	Csrboh5.1_M4h_1_RNA_seq	36374428	25336465	17495081	69.6546	48.0972
5	Csrboh5.1_M4h_2_RNA_seq	34827678	29619659	27349384	85.0463	78.5277
6	Csrboh5.1_M4h_3_RNA_seq	37423640	32846453	23686044	87.7693	63.2917
7	Csrboh5.1_M48h_1_RNA_seq	35872574	30007200	27576266	83.6494	76.8728
8	Csrboh5.1_M48h_2_RNA_seq	38552278	32947227	30570852	85.4612	79.2971
9	Csrboh5.1_M48h_3_RNA_seq	40005372	33266807	24364373	83.1558	60.9028
10	WT_CK48h_1_RNA_seq	42909812	41819903	40575518	97.46	94.56
11	WT_CK48h_2_RNA_seq	40255936	39044232	37655403	96.99	93.54
12	WT_CK48h_3_RNA_seq	40241782	39119036	37686429	97.21	93.65
13	WT_M4h_1_RNA_seq	40116196	38928757	37769399	97.04	94.15
14	WT_M4h_2_RNA_seq	44726266	43558910	41470194	97.39	92.72
15	WT_M4h_3_RNA_seq	40015044	38874615	37634149	97.15	94.05
16	WT_M48h_1_RNA_seq	40445842	39341671	38099983	97.27	94.2
17	WT_M48h_2_RNA_seq	44703584	43349065	41730796	96.97	93.35
18	WT_M48h_3_RNA_seq	41586300	40388615	38388314	97.12	92.31

## Sheet: Table 1b
Table 1b Summary of ChIP-Seq data.
NO.	Sample name	Total reads	Mapped reads	Unique mapped reads	Map rate	Unique map rate
1	WT_CK_1_H3K4me3	45251450	29903290	25093519	66.0825	55.4535
2	WT_CK_2_H3K4me3	44469752	24743966	21406888	55.6422	48.1381
3	WT_CK_3_H3K4me3	42268942	38683088	31968282	91.5166	75.6307
4	WT_M4h_1_H3K4me3	39138582	24213255	20830084	61.8654	53.2214
5	WT_M4h_2_H3K4me3	56792798	40857978	35081887	71.9422	61.7717
6	WT_M4h_3_H3K4me3	53302262	49581766	41951297	93.02	78.7045
7	WT_M48h_1_H3K4me3	40792884	23991848	21177179	58.8138	51.9139
8	WT_M48h_2_H3K4me3	51090150	34486082	30847861	67.5005	60.3793
9	WT_M48h_3_H3K4me3	64312144	59637629	48969655	92.7315	76.1437
10	WT_CK_1_H3K27me3	36746340	14529734	6100803	39.5406	16.6025
11	WT_CK_2_H3K27me3	41122464	11748060	5375520	28.5685	13.072
12	WT_M4h_1_H3K27me3	29145344	9050904	4448777	31.0544	15.2641
13	WT_M4h_2H3K27me3	38201268	14886210	7390062	38.9678	19.3451
14	WT_M48h_1_H3K27me3	32355198	13344069	6650959	41.2424	20.5561
15	WT_M48h_2_H3K27me3	35286510	12456802	6123004	35.3019	17.3523
16	WT_CK_1_input_H3K4me3_H3K27me3	80543366	77242656	41171179	95.9019	51.1168
17	WT_CK_2_input_H3K4me3_H3K27me3	87261538	83428088	45418161	95.6069	52.0483
18	WT_CK_3_input_H3K4me3	44511746	42613313	27129866	95.735	60.9499
19	WT_M4h_1_input_H3K4me3_H3K27me3	70676218	66916588	37091446	94.6805	52.4808
20	WT_M4h_2_input_H3K4me3_H3K27me3	69333748	66188061	36010011	95.463	51.9372
21	WT_M4h_3_input_H3K4me3	41429898	39031313	25022868	94.2105	60.3981
22	WT_M48h_1_input_H3K4me3_H3K27me3	85613688	82231562	44009006	96.0495	51.4042
23	WT_M48h_2_input_H3K4me3_H3K27me3	68021286	65213968	35308491	95.8729	51.908
24	WT_M48h_3_input_H3K4me3	45679922	43692822	27844753	95.6499	60.9562
25	Csrboh5.1_CK_1_H3K4me3	51075580	50149113	48185848	98.1861	94.3422
26	Csrboh5.1_CK_2_H3K4me3	36612546	35480704	33992005	96.9086	92.8425
27	Csrboh5.1_M4h_1_H3K4me3	42030638	39908744	37948383	94.9516	90.2874
28	Csrboh5.1_M4h_2_H3K4me3	46927212	46529671	44351525	99.1529	94.5113
29	Csrboh5.1_M48h_1_H3K4me3	46064116	44831702	42787817	97.3246	92.8875
30	Csrboh5.1_M48h_2_H3K4me3	42764928	41203937	39227900	96.3498	91.7291
31	Csrboh5.1_CK_1_input_H3K4me3	46590048	42635383	39583309	91.5118	84.9609
32	Csrboh5.1_CK_2_input_H3K4me3	41728226	39689890	36728164	95.1152	88.0176
33	Csrboh5.1_M4h_1_input_H3K4me3	45611080	42146028	38852755	92.403	85.1827
34	Csrboh5.1_M4h_2_input_H3K4me3	43457936	40089234	36966491	92.2484	85.0627
35	Csrboh5.1_M48h_1_input_H3K4me3	39923122	36597504	33583422	91.6699	84.1202
36	Csrboh5.1_M48h_2_input_H3K4me3	48525810	44806093	41342782	92.3346	85.1975
