# Supplementary material for: Knockout CsRBOH5.1 causes global decrease of H3K4me3 on genes during recovery after cold stress acclimation, leading to acclimation failure
Source: Research Square preprint supplement (doi:10.21203/rs.3.rs-3226653/v1), 2023-08-03
Supplement: Supplementary file 4 [file Extended Data Table 2.xlsx]

## Sheet: up-memory
Table 2a The expression of up-memory genes in WT and Csrboh5.1 mutants
Gene	WT_CK_1	WT_CK_2	WT_CK_3	WT_R4h_1	WT_R4h_2	WT_R4h_3	WT_R48h_1	WT_R48h_2	WT_R48h_3	qvalue_CK-vs-R4h	qvalue_CK-vs-R48h	qvalue_R4h-vs-R48h	gene_expression_type	Csrboh5.1_CK_1	Csrboh5.1_CK_2	Csrboh5.1_CK_3	Csrboh5.1_R4h_1	Csrboh5.1_R4h_2	Csrboh5.1_R4h_3	Csrboh5.1_R48h_1	Csrboh5.1_R48h_2	Csrboh5.1_R48h_3	qvalue_CK-vs-R4h	qvalue_CK-vs-R48h	qvalue_R4h-vs-R48h	gene_expression_type
CsaV3_1G001480	56.83	55.42	51.21	141.42	107.48	142.43	108	96.53	89.13	0.000131904	0.00530273	0.611657	up-memory	48.96	51.99	54.17	118.52	89.97	95.92	53.59	72.47	74.76	5.82678e-06	0.943129	0.0177262	up
CsaV3_1G002330	24.04	18.04	18.76	74.18	41.74	48.45	51.01	45.51	40.22	3.53e-06	0.00218177	0.589496	up-memory	12.16	15.51	15.49	13.62	17.89	20.69	17.09	18.82	25.05	0.250328	0.943129	0.989648	others
CsaV3_1G003930	211.87	202.28	189.52	525.12	399.13	417.74	450.38	362.23	383.6	0.000131734	0.000167247	0.915593	up-memory	272.54	311.73	357.53	397.98	280.21	425.94	332.52	411.95	391.61	0.166838	0.992955	0.698453	others
CsaV3_1G005920	36.28	33	24.11	84.11	72.99	72.95	59	60.37	50.94	0.000144547	0.0218786	0.489918	up-memory	84.1	69.83	111.58	198.03	122.14	117.76	138.54	97.84	195.96	0.010578	0.878262	0.716745	up
CsaV3_1G006340	103.32	144.5	104.22	369.02	369.67	406.02	284.98	182.21	229.25	6.5e-09	0.0223207	0.122805	up-memory	59.39	62.09	108.76	159.35	113.51	157.28	100.58	130.79	179.53	0.00230276	0.749352	0.577814	up
CsaV3_1G007260	34.13	24.52	25.06	100.71	46.68	56.71	53.15	62.09	45.24	0.0224419	0.0333674	0.841047	up-memory	24.23	31.45	17.38	28.18	38.98	41.14	21.64	31.45	28.86	0.0206951	0.997745	0.0975577	up
CsaV3_1G014430	4.26	3.33	3.75	10.34	6.26	9.19	7.21	8.13	7.11	0.0182025	0.0150111	0.980109	up-memory	2.3	1.62	2.35	3.15	2.42	3.18	3.01	1.52	2.55	0.177565	0.997745	0.492944	others
CsaV3_1G014820	101.04	166.83	148.23	306.49	377.47	357.75	312.68	222.2	266.52	0.00010681	0.0171872	0.66799	up-memory	215.34	288	371.08	372.34	171.98	339.97	292.15	393.43	411.78	0.642339	0.994641	0.902993	others
CsaV3_1G015150	156.26	175.5	189.8	326.07	278.25	347.54	289.54	287.46	373.4	0.00957535	0.000720778	0.552446	up-memory	0	0.05	0	0.36	0.65	0.27	0	0	0.18	0.0456463			up
CsaV3_1G045550	43.29	60.19	34.57	200.79	162.62	137.15	173.98	123.9	82.03	2.81e-09	0.00162966	0.603594	up-memory	36.26	46.03	57.89	62.96	45.22	65.79	66.79	63.79	89.38	0.181278	0.787526	0.821765	others
CsaV3_2G002790	124.66	112.81	104.57	373.91	237.4	258.55	244.72	227.29	161.42	0.000206727	0.0443492	0.615344	up-memory	166.6	176.62	232.22	406.23	298.28	491.48	205.96	228.95	274.72	1.42049e-05	0.994641	0.0046047	up
CsaV3_2G011060	269.28	260.7	338.76	866.25	668.85	651.74	852.38	557.96	581.78	0.000268419	0.0196445	0.890887	up-memory	410.01	515.72	573.16	591.4	417.79	685.89	460.4	572.72	786.21	0.263277	0.99525	0.848147	others
CsaV3_2G011490	78.6	67.17	72.93	236.2	135.41	158.77	198.11	145.22	100.37	0.00213344	0.0382719	0.958973	up-memory	103.51	123.44	146.12	150	117.77	176.33	144.36	183.18	155.47	0.158048	0.967169	0.853897	others
CsaV3_2G012470	606.1	669.32	630.9	1327.77	1086.49	1335.6	1557.39	1063.08	1385.35	0.000827491	0.000504288	0.39997	up-memory	510.38	571.58	713.96	724.48	456.01	767.73	581.8	731.55	920.16	0.381539	0.994641	0.97689	others
CsaV3_2G013510	323.22	439.62	440.3	854.47	860.93	1007.02	652.31	622.39	862.98	7.32e-05	0.0103546	0.703554	up-memory	414.83	536.29	607.11	583.54	375.65	615.12	498.98	628.45	695.75	0.554434	0.99525	0.994461	others
CsaV3_2G025380	63.21	70.35	61.99	172.8	135.57	153.07	91.34	99.52	96.1	4.85e-06	0.0443492	0.0533746	up-memory	44.12	48.79	51.33	31.08	31.94	44.51	47.03	45.97	55.05	0.56249	0.997745	0.505838	others
CsaV3_2G028240	0	0	0	0.66	1.35	2.37	1.51	1.24	0.49	0.000531335	0.00738081	0.888483	up-memory	0	0.19	0	0	0	0	0	0	0				others
CsaV3_3G003150	92.96	120.49	112.5	244.87	235.53	252.29	215.25	168.81	204.33	0.000136298	0.020747	0.789757	up-memory	84.62	101.85	107.06	149.22	105.13	195.1	93.27	127.65	192.81	0.0108706	0.967169	0.574671	up
CsaV3_3G012060	381.87	500.16	469.66	738.02	769.63	885.69	640.47	691.02	840.59	0.0158206	0.0259568	0.86533	up-memory	453.38	519.36	754.43	737.19	472.93	658.35	673.27	691.77	628.86	0.411911	0.997745	0.80755	others
CsaV3_3G012600	196.28	291.32	299.78	506.72	492.76	475.88	573.04	409.39	493.98	0.0217569	0.0307953	0.55197	up-memory	289.07	374.89	452.27	542.13	362.06	603.7	419.49	546.6	592.59	0.0569417	0.921526	0.739326	others
CsaV3_3G017450	4.46	3.58	3.76	13.23	12.49	6.97	15.54	11.26	13.57	0.0147365	5.85e-05	0.290387	up-memory	4.5	6.73	5.71	3.9	5.04	3.88	2.77	11.33	3.54	0.837242	0.998464	0.858734	others
CsaV3_3G018380	136.5	133.04	158.46	266.28	237.92	299.4	305.53	259.97	265.85	0.0125371	0.00160219	0.476226	up-memory	163.94	226.07	279.27	323.19	209.18	317.32	265.85	348.13	282.9	0.133073	0.970253	0.784039	others
CsaV3_3G022680	197.13	303.64	304.71	502.35	495.3	567.11	487.62	403.66	516.49	0.01069	0.0262169	0.887644	up-memory	218.71	243.65	332.83	416.6	250.67	381.93	287.09	334.03	298.45	0.0855961	0.997745	0.336912	others
CsaV3_3G026840	337.84	419.41	453.76	785.02	680.89	759.73	806.14	663.09	794.67	0.00643817	0.0005744	0.42728	up-memory	500.81	628.04	750.93	527.47	369.21	610.43	738.29	885.03	807.26	0.852633	0.967169	0.198479	others
CsaV3_3G027210	20.09	14	16.36	46.08	40.71	34.01	39.04	31.31	27.65	0.00249422	0.0468687	0.876876	up-memory	16.89	19.18	21.71	28.95	25.39	42.31	23	28.62	29.53	0.00441574	0.880077	0.302639	up
CsaV3_3G028140	51.77	42.91	43.38	119.41	66.98	121.27	138.04	101.5	85.15	0.00506428	0.00134135	0.610957	up-memory	5.81	14.98	13.52	24.09	14.47	25.64	21.99	18.19	11.1	0.0173773	0.990152	0.408344	up
CsaV3_3G030910	116.71	120.21	125.53	257.59	226.95	244.27	234.46	220.77	205.41	2.37e-05	0.000258213	0.915661	up-memory	76.16	83.71	99.92	169.23	91.68	161.48	102.25	111.14	139.14	0.00706856	0.90952	0.323312	up
CsaV3_3G032360	129.9	96.2	116.23	316.16	209.46	227.31	312.58	265.94	235.4	0.00544419	5.1e-05	0.384103	up-memory	137.97	171.81	206.92	254.49	156.4	302.22	172.88	227.03	296.57	0.0614993	0.975833	0.663379	others
CsaV3_3G035460	101.38	67	92.07	258.54	159.28	191.26	153.23	182.86	179.38	0.00684944	0.00642288	0.961915	up-memory	87.82	130.54	161.12	120.54	94.46	133.05	134.81	206.27	161.76	0.836079	0.990152	0.44467	others
CsaV3_3G040270	43.13	43.84	48.19	103.94	90.74	93.3	96.1	70.65	73.09	0.000161535	0.0205011	0.917935	up-memory	34.92	43.71	43.88	49.77	42.35	54.74	35.67	56.89	47.19	0.124454	0.997745	0.513287	others
CsaV3_3G041130	8.06	8.54	7.66	27.57	13.47	19.62	29.67	18.86	14.47	0.0106251	0.00496257	0.677637	up-memory	9.78	6.2	6.53	14.93	9.8	12.4	8.63	11.24	14.69	0.0283471	0.936401	0.59113	up
CsaV3_3G042840	0	0	0	1.05	2.13	0.3	1.72	1.18	0.75	0.000674462	0.00031408	0.80291	up-memory	2.91	1.91	2.07	3.26	2.97	3.3	1.74	1.84	1.39	0.244544	0.99525	0.0669203	others
CsaV3_3G049990	295.27	282.68	274.18	694.44	517.76	616.73	734.86	554.09	548.49	0.000497545	5.28e-05	0.561566	up-memory	205.26	214.43	215.14	343.39	231.47	421.31	265.07	294.67	303.45	0.00278816	0.572619	0.319988	up
CsaV3_4G000800	14.42	12.15	10.72	50.4	33.52	38.99	36.42	30.27	21.93	8.56e-06	0.00530134	0.615973	up-memory	13.31	18.5	17.64	16.23	18.35	20.83	13.85	20.95	24.15	0.31369	0.997745	0.826882	others
CsaV3_4G004050	468.35	564.19	536.67	1207.94	1085.75	1143.67	1203.71	923.09	1022.47	2.93e-06	0.000106508	0.820688	up-memory	271.3	309.84	355.16	515.76	349.41	569.62	346.71	475.56	484.57	0.00480464	0.85501	0.414803	up
CsaV3_4G004520	6.24	5.87	5.11	11.58	11.86	14.1	9.07	11.9	10.66	0.00539437	0.0430526	0.903296	up-memory	3.85	2.75	1.87	6.25	4.21	4.66	5.49	4.69	1.86	0.0504115	0.99525	0.547328	others
CsaV3_4G011790	321.3	286.08	300.3	635.91	493.61	596.31	597.63	575.9	592.39	0.00697867	1.05e-05	0.428928	up-memory	252.24	332.96	417.84	518.36	330.85	462.38	375.73	431.83	363.19	0.0861584	0.997745	0.354927	others
CsaV3_4G011820	70.19	60.75	68.81	144.78	149.52	95.42	92.66	159.42	129.69	0.0178782	0.0223033	0.713866	up-memory	34.46	89.72	97.62	18.29	52.78	22.89	33.18	102.01	31.89	0.0715407	0.997745	0.487065	others
CsaV3_4G013280	100.59	118.01	89.69	293.44	268.74	306.66	251.54	205.01	199.52	7.78e-08	0.000398034	0.596726	up-memory	81.23	98.62	128.6	200.73	111.05	190.14	121.83	138.03	133.14	0.0117631	0.990152	0.198864	up
CsaV3_4G026000	7.08	5.24	6.27	11.27	12.84	11.16	10.12	10.6	13.43	0.0424932	0.0473149	0.676818	up-memory	0.77	1.47	1.76	1.1	0.65	0.44	2.34	3.05	1.12	0.542906	0.990152	0.156835	others
CsaV3_4G032310	88.76	127.72	103.92	352.74	299.97	254.38	314.48	170.59	230.15	1.25e-05	0.0196957	0.821716	up-memory	188.19	200.16	239.1	266.92	199.06	226.92	274.77	280.33	380.6	0.274009	0.697256	0.65358	others
CsaV3_4G033740	5.38	5.61	1.77	80.76	51.62	63.52	37.35	26.42	11.69	1.51e-09	0.0232259	0.0567379	up-memory	12.6	19.9	27.23	57.71	44.47	28.81	14.64	29.62	64.46	0.00523148	0.970253	0.57029	up
CsaV3_5G001000	313.46	350.9	369.8	685.53	564.13	637.17	646.8	597.73	770.73	0.0049207	5.33e-05	0.298194	up-memory	356.19	480.92	552.98	607.02	390.15	689.77	466.27	615.56	578.39	0.179757	0.99525	0.620294	others
CsaV3_5G002920	19.38	19.39	19.56	69.56	40.81	43.21	53.7	41.73	30.99	0.000118693	0.00503372	0.865821	up-memory	16.06	18.44	21.85	21.82	12.36	28.66	26.62	21.67	31.4	0.469939	0.929838	0.841997	others
CsaV3_5G003040	8.46	8.8	7.49	20.11	22.55	19.46	16.91	15.26	11.49	4.7e-07	0.0430914	0.417123	up-memory	3.12	2.91	2.61	5.03	3.5	5.76	3.29	2.73	4.68	0.0239888	0.99525	0.294522	up
CsaV3_5G005100	147.77	114.96	95.93	416.64	230.32	241.7	367.96	287.17	179.47	0.00709871	0.0152797	0.838863	up-memory	142.52	143.55	129.39	155.85	128.51	196.5	125.58	145.25	205.32	0.147121	0.997745	0.652365	others
CsaV3_5G005450	245.91	247.81	247.64	538.85	479.89	511.7	530.51	388.59	472.96	0.00012459	0.010529	0.883811	up-memory	321.09	284.22	337.89	624.44	405.8	757.11	311.79	388.26	552.88	0.000153345	0.975833	0.108963	up
CsaV3_5G005530	118.72	126.83	122.44	277.54	208.72	259.03	228.48	214.85	204.57	0.00165372	0.000700075	0.98029	up-memory	75.48	97.88	111.03	128.18	70.56	120.62	101.01	128.14	131.95	0.352784	0.984139	0.951211	others
CsaV3_5G008790	221.38	204.11	187.51	546.5	338.51	404.14	466.73	416.6	480.73	0.00506428	4.61e-05	0.46139	up-memory	456.46	590.12	671.12	695.11	412.06	695.15	515.93	691.56	807.24	0.476438	0.997745	0.925554	others
CsaV3_5G023800	314.99	297.92	296.38	721.02	694.23	717.67	707.94	607.55	616.32	8.07e-07	0.000124992	0.897308	up-memory	313.81	341.28	389.02	672.64	460.3	773.99	304.48	413.42	580.82	0.000128077	0.99525	0.0792635	up
CsaV3_5G026230	201.95	290.11	254.13	427.69	440.1	424.47	508.22	375.86	487.07	0.041586	0.0211052	0.356809	up-memory	224.77	244.43	279.97	334.29	196.75	383.18	211.01	240.83	408.89	0.178697	0.997745	0.627666	others
CsaV3_5G029600	17.26	14.95	11.16	38.33	28.43	27.69	37.27	34.62	19.49	0.0020832	0.0262169	0.760971	up-memory	9.46	9.17	10.71	10.47	6.35	9.99	9.68	8.69	10.37	0.888734	0.998249	0.893246	others
CsaV3_5G030080	510.38	507.01	491.67	1110.99	822.4	949.99	1120.41	917.89	898.85	0.00540174	0.000124992	0.491092	up-memory	572.16	677.51	788.23	799.79	576.83	909.85	743.98	870.32	919.47	0.25334	0.975833	0.900216	others
CsaV3_5G030340	119.7	176.57	171.52	381.53	343.82	337.49	268.72	239.44	281.64	0.000244853	0.0416464	0.461945	up-memory	142.82	149.3	139.39	124.52	108.31	170.76	141.8	126.87	200.64	0.746628	0.997745	0.983907	others
CsaV3_5G032570	192.11	284.27	264.77	458.93	488.96	509.69	493.42	388.96	547.36	0.00441819	0.00566406	0.607429	up-memory	326.94	431.46	534.6	552.94	291.66	514.11	449.71	541.45	489.74	0.516755	0.997745	0.877744	others
CsaV3_5G035090	6.48	6.25	6.62	14.9	15	14.68	13.17	12.83	12	0.00452486	0.0405242	0.983244	up-memory	6.67	5.73	6.51	7.35	6.81	6.42	3.86	3.86	7.75	0.537214	0.997745	0.375598	others
CsaV3_5G038460	178.9	199.76	239.4	506.41	435.46	416.49	386.25	331.55	402.31	0.000287483	0.0107198	0.86041	up-memory	246.48	318.53	427.38	298.99	270.26	311.75	372.34	488.58	560.62	0.907141	0.936401	0.163	others
CsaV3_5G039260	284.66	296.62	297.36	731.28	574.48	634.89	562.73	519.19	560.86	2.39e-05	7.19e-06	0.946997	up-memory	313.94	385.14	438.8	486.63	332.85	482.07	371.87	472.49	476.33	0.218861	0.99525	0.658931	others
CsaV3_6G002550	241.8	289.69	266.4	642.21	515.68	678.23	432.66	492.46	478.25	4.73e-05	0.000335014	0.63307	up-memory	223.43	272.29	327.84	471.77	289.08	415.74	308.78	401.89	344.49	0.0245475	0.975833	0.375183	up
CsaV3_6G002760	182.34	228.3	272.52	503.32	521.72	494.91	381.75	351.03	522.72	7.02e-05	0.0145111	0.871799	up-memory	282.21	265.66	290.36	273.44	193.99	319.4	303.11	338.61	363.22	0.740161	0.975833	0.762631	others
CsaV3_6G003390	0.61	1.23	1.26	11.35	13.93	5.76	3.3	3.28	8.35	1.09e-07	0.0102546	0.194814	up-memory	19.88	44.2	26.58	2.75	2.98	3.62	3.12	8.96	41.1	3.10165e-14	0.99525	0.0222658	down
CsaV3_6G007430	430.69	504.42	481.16	948.59	853.8	974.17	973.09	765.34	949.77	0.000679686	0.00160219	0.665291	up-memory	787.74	957.88	1099.64	1144.44	696.24	1244.25	933.59	1288.09	1215.29	0.386716	0.994641	0.918756	others
CsaV3_6G013750	98.96	104.43	109.35	241.56	185.21	205.82	143	163.7	165.57	0.000180699	0.0333674	0.37613	up-memory	62.04	73.51	78.09	64.69	61.85	86.59	96.86	102.24	103.37	0.508678	0.609708	0.364182	others
CsaV3_6G021530	142.02	120.41	129.56	438.11	295.19	321.5	292.86	266.57	242.57	1.04e-05	0.00036742	0.664242	up-memory	342.48	396.76	446.25	591.66	458.4	693.79	342.64	368.32	677.51	0.00493966	0.997745	0.276833	up
CsaV3_6G034270	351.26	467.53	452.46	1006.27	859.13	957.71	988.79	670.19	815.64	4.73e-05	0.00353255	0.965153	up-memory	351.77	355.26	448.82	450.84	350.01	530.59	417.87	523.26	613.29	0.188941	0.934977	0.989397	others
CsaV3_6G046990	161.2	141.39	152.17	500.59	346.66	369.78	380.84	300.56	254.65	9.26e-06	0.00170349	0.729945	up-memory	92.45	129.7	143.22	191.93	134.94	196.41	124.87	165.14	204.8	0.0208182	0.970253	0.522452	up
CsaV3_6G051000	135.99	163.48	163.81	279.71	246.45	283.37	288.36	222.36	262.18	0.0196742	0.027249	0.708253	up-memory	172.48	239.28	297.04	288.25	240.51	294.67	308.78	365.41	391.52	0.215688	0.811452	0.691228	others
CsaV3_7G001960	146.87	147.19	137.11	448.78	320.49	316.35	345.18	277.21	291.36	2.26e-05	6.24e-05	0.946561	up-memory	279.02	301.01	325.14	445.47	324.89	507.63	329.13	368.81	479.98	0.0102586	0.943129	0.44941	up
CsaV3_7G008490	551.09	659.49	709.5	1228.48	1362.27	1376.27	981.26	894.93	1077.31	0.00013116	0.0425578	0.446877	up-memory	458.23	599.05	754.96	647.64	459.51	534.03	698.9	864.73	649.6	0.845668	0.99525	0.64799	others
CsaV3_7G022360	105.86	152.1	166.77	378.42	315.32	351.44	298.65	254.57	323.72	7.59e-05	0.00579416	0.773498	up-memory	157.8	194.27	267.61	223.36	202.77	210.24	234.49	337.96	304.56	0.501783	0.943129	0.529324	others
CsaV3_7G026220	1.1	0.61	0.94	12.49	16.21	57.04	1.42	9.02	15.26	3.09e-13	0.000348549	0.306741	up-memory	1.98	5.58	6.01	0.5	4.13	0.6	6.14	14.97	5.29	0.285409	0.936401	0.0451157	others
CsaV3_UNG100750	6.22	3.55	5.09	22.06	23.66	11.53	18.89	13.08	12.7	0.00019675	0.000829994	0.842754	up-memory	0.3	1.67	1.28	1.6	3.18	1.29	1.25	4.45	2.34	0.266645	0.931966	0.917098	others

## Sheet: down-memory
Table 2b The expression of down-memory genes in WT and Csrboh5.1 mutants
Gene	WT_CK_1	WT_CK_2	WT_CK_3	WT_R4h_1	WT_R4h_2	WT_R4h_3	WT_R48h_1	WT_R48h_2	WT_R48h_3	qvalue_CK-vs-R4h	qvalue_CK-vs-R48h	qvalue_R4h-vs-R48h	gene_expression_type	Csrboh5.1_CK_1	Csrboh5.1_CK_2	Csrboh5.1_CK_3	Csrboh5.1_R4h_1	Csrboh5.1_R4h_2	Csrboh5.1_R4h_3	Csrboh5.1_R48h_1	Csrboh5.1_R48h_2	Csrboh5.1_R48h_3	gene_expression_type
CsaV3_1G003310	57.63	117.13	103.79	45.31	64.88	46.67	36.58	26.42	45.18	0.00218625	8.09e-05	0.425306	down-memory	80.72	55.87	64.67	18.8	26.03	24.68	38.71	46.7	70.53	down
CsaV3_1G003390	18.2	6.49	2.85	0.22	0.67	0.22	0.82	2.4	0.23	1e-07	0.0112839	0.204022	down-memory	0	0.35	0	0	0.26	0.36	0	0.17	0.35	others
CsaV3_1G003640	211.34	349.31	306	167.86	222.81	242.3	153.09	152.57	207.85	0.0196742	0.0139175	0.769494	down-memory	152.8	187.92	167.46	106.92	185.26	158	226.07	186.35	126.69	others
CsaV3_1G004440	48.73	54.77	44.17	23.78	36.84	32	23.69	31.83	29.91	0.000575256	0.00678657	0.813588	down-memory	5.62	14.54	10.98	2.98	5.87	5.67	7.49	11.39	13.46	others
CsaV3_1G005230	21.3	30.46	30.15	5.06	8.12	8.97	10.29	7.92	17.2	5.41e-11	0.00503372	0.0617537	down-memory	4.87	4.3	6.42	11.16	6.58	12.62	10.6	7.33	2.9	up
CsaV3_1G005240	467.81	707.62	529.08	74.09	188.48	121.45	118.4	110.2	290.77	1.49e-10	0.000187995	0.265107	down-memory	73.55	86.26	215.76	87.59	46.36	52.42	282.64	183.31	84.35	others
CsaV3_1G005900	29.17	78.71	140.21	38	36.14	33.16	12.27	15.87	18.44	0.0238861	3.82e-05	0.000204684	down-memory	16.71	14.83	16.14	15.2	16.5	13.77	12.16	11.43	17.1	others
CsaV3_1G006010	155.43	161.1	161.67	92.08	126.06	140.31	101.58	101.42	122.04	0.0127754	0.00922253	0.853239	down-memory	48.4	34.27	21.74	40.24	48.75	44.96	25.14	20.73	34.1	others
CsaV3_1G007960	4.25	3.9	1.24	0.06	0.24	0	0.46	0.62	0.35	2.91e-08	0.000185026	0.0717199	down-memory	0	0	0	0	0	0	0	0.05	0	others
CsaV3_1G008380	2.67	2.78	2.74	1.39	1.97	1.29	1.27	0.99	1.08	0.0172441	0.0182873	0.763465	down-memory	0.48	0.48	0.17	1.86	1.75	0.57	0.51	0.43	0.25	up
CsaV3_1G009700	17.22	40.13	25.75	4.37	11.48	3.4	8.53	4.1	5.54	5.59e-08	3.72e-08	0.589496	down-memory	2.86	1.46	3.06	0	0.82	0.63	1.4	1.73	5.32	others
CsaV3_1G012390	41.92	41.55	49.61	25.76	33.57	31.2	25.84	25.67	32.21	0.000288786	0.00609709	0.772588	down-memory	15.17	9.33	8.02	4.35	9.96	11.47	12.11	9.09	13.15	others
CsaV3_1G014750	110.79	143.61	90.14	2.32	19.99	0.66	43.87	27.07	11.82	0.00400638	0.000167247	0.240651	down-memory	0	0.09	0	0	0.23	0	0	0.06	0	others
CsaV3_1G028520	142.19	190.7	133.3	34.05	104.61	49.65	36.65	53.5	83.7	0.0140129	0.0156621	0.979838	down-memory	5.8	7.65	6.34	0	4.03	2.98	7.89	3.23	20.52	others
CsaV3_1G032220	72.59	159.13	153.81	19.97	29.9	19.34	20.95	15.99	27.95	2.4e-10	4.91e-12	0.682844	down-memory	27.87	31.71	29.81	46.63	46.88	35.64	34.66	26.07	40.26	up
CsaV3_1G035720	144.35	218.68	196.82	101.69	94.07	140.79	73.6	67.14	92.01	0.00811917	0.000325853	0.469179	down-memory	0	0	0	0	0	0	0	0	0	others
CsaV3_1G035800	1.43	6.39	16.75	2.29	1.42	0.73	0	0.15	0	0.00293736	3.15e-06	0.00353567	down-memory	1.79	2.03	1.73	0.51	0.83	0.19	0.63	1.69	0.65	others
CsaV3_1G035820	918.37	1100.12	1456.18	194.02	132.09	64.16	57.54	67.19	74.21	1.33e-16	1.93e-59	0.124303	down-memory	5.26	10.37	12.48	7.89	7.59	7.49	10.09	14.35	8.67	others
CsaV3_1G035830	117.9	220.48	275.04	11	28.45	11.86	11.55	17.18	20.44	8.1e-14	1.54e-16	0.909444	down-memory	76.38	81.75	102.75	38.62	50.46	43.36	78.71	69.05	103.86	down
CsaV3_1G035950	118.96	342.93	391.95	85.57	194.17	100.6	119.56	72.55	114.98	0.0103179	0.0100929	0.89736	down-memory	195.38	155.67	129.26	131.11	192.69	194.39	179.11	147.96	203.4	others
CsaV3_1G039750	167.34	178.5	219.19	112.49	180.22	127.33	105.24	86.11	127.87	0.0379851	0.00625961	0.694514	down-memory	45.98	38.73	39.2	43.32	49.84	37.28	60.12	35.14	78.47	others
CsaV3_1G043850	12.1	9.5	8.95	3.68	4.12	4.66	4.96	4.49	4.71	4.23e-05	0.0133005	0.49693	down-memory	16.45	6.3	11.25	26.18	73.65	11.2	13.63	6.41	5.23	others
CsaV3_1G044020	188.78	317.64	356.57	109.25	98.34	54.57	50.98	63.22	60.78	1e-07	2.28e-15	0.413167	down-memory	64.02	61.72	61.53	46.42	46.4	40.23	40.63	52.74	98.78	others
CsaV3_1G045850	32.94	45.87	26.7	15.13	22.99	8.2	17.85	18.63	15.74	0.00145948	0.00637251	0.447365	down-memory	8.89	12.37	14.5	1.59	1.49	4.81	5.37	10.85	10.07	down
CsaV3_1G045860	10.67	13.09	6.46	2.03	3.14	2.68	2.36	3.36	2.3	0.000188593	0.00784848	0.841915	down-memory	0.73	1.22	1.56	1.29	1.82	1.54	0.28	1.06	1.7	others
CsaV3_2G002310	43.01	114.76	209.81	22.53	30.03	6.52	2.25	3	1.68	6.12e-05	4.11e-15	0.00118384	down-memory	6.69	9.56	5.98	1.19	2.58	1.47	1.09	1.62	10.43	down
CsaV3_2G006790	348.24	476.18	286.41	9.1	80.31	4.9	186.43	123.35	57.39	0.00477134	0.00465762	0.138331	down-memory	0.03	0.45	0.26	0.21	0.17	0.23	0.43	0.56	0.49	others
CsaV3_2G027960	1500.39	1784.34	1530.55	614.75	720.21	930.39	848.28	919.32	940.63	0.000132704	0.0153985	0.289904	down-memory	12854.6	7154.71	8115.92	18274.1	17186.7	19262.2	9439.31	4253.31	6358.27	up
CsaV3_2G028110	37.07	72.89	77.05	35.14	54.54	36.47	24.44	20.41	17.9	0.049878	5.51e-05	0.0180244	down-memory	30.45	14.35	18.36	37.23	39.45	27.56	12.07	7.81	10.34	up
CsaV3_2G028120	39.44	27.21	22.75	21.86	22.71	13.8	13.32	15.7	10.03	0.0298625	0.00696145	0.447912	down-memory	9.43	9.09	7.91	5.94	11.67	11.51	5.59	8.48	9.46	others
CsaV3_2G028350	91.54	67.13	17.7	19.36	38.39	6.58	12.48	23.17	8.49	0.039848	0.0130781	0.750481	down-memory	3.09	6.59	13.52	3.33	3.08	0.73	0	2.51	4.87	others
CsaV3_2G028480	90.93	240.25	296.59	76.88	131.75	79.95	25.43	26.62	51.17	0.00653131	1.26e-07	0.000823913	down-memory	69.47	65.25	89.19	34.13	49.95	24.33	35.46	32.71	96.1	down
CsaV3_2G031280	316.84	330.43	101.38	10.31	77.51	10.24	41.62	18.62	12.5	0.00997937	1.09e-08	0.931807	down-memory	11.88	12.65	10.47	21.64	28.3	35.9	28.85	10.35	29.34	up
CsaV3_2G033290	17.33	19.32	13.22	2.81	8.24	0.97	8.52	6.46	6.52	0.00112753	0.00384537	0.197195	down-memory	1.27	0.52	0.7	1.38	1.13	0.13	0.76	0.53	0.13	others
CsaV3_2G034950	71.06	212.91	89.81	16.77	39.16	14.68	32.36	16.4	11.16	8.79e-07	7.12e-06	0.997153	down-memory	10.47	17.06	12.17	3.54	11.27	6.92	15.28	16.02	11.87	others
CsaV3_3G005710	117.35	133.34	149.8	48.67	74.61	83.13	54.28	62.83	75.41	5.2e-05	1.03e-05	0.82205	down-memory	6.6	10.54	7.59	2.01	3.45	3.41	7.87	15.56	2.04	down
CsaV3_3G005740	8.59	8.15	4.54	1.44	1.52	0.44	2.2	1.46	0.9	1.73e-07	8.04e-05	0.508188	down-memory	0.64	0.22	0	0	0.39	0	0.34	0.05	0.3	others
CsaV3_3G006720	4.4	11.63	23.29	0.34	1.02	0.51	1.07	0.15	0.52	3.22e-08	1.7e-06	0.970088	down-memory	0	0.19	0.11	0	0.12	0.16	0	0.22	0.16	others
CsaV3_3G006730	90.32	88.89	50.82	48.16	51.45	41.05	42.32	39.38	31.95	0.00541436	0.0161708	0.850019	down-memory	14.2	22.08	18.81	2.45	3.81	4.84	9.31	14.55	18.59	down
CsaV3_3G010070	26.13	26.87	30.73	11.47	4.93	6.88	6.48	9.15	3.3	1.21e-06	2.74e-05	0.954732	down-memory	15.97	13.64	5.36	3.27	6.65	5.08	25.1	15.09	10.97	others
CsaV3_3G011270	93.85	58.02	32.91	5.17	10.7	2.55	16.13	14.47	5.53	2.97e-10	8.59e-05	0.060516	down-memory	2.65	1.08	0.42	2.51	4.37	3.35	0.87	1.29	0.23	up
CsaV3_3G014240	92.98	113.97	91.28	37.53	88.53	49.83	58.29	49.64	52.03	0.0115216	0.000282255	0.885641	down-memory	31.03	28.04	26.69	46.81	54.05	38.14	30.53	36.12	30.54	up
CsaV3_3G017500	39.53	60.27	107.05	3.74	21.72	2.02	10.56	5.86	14.62	0.000180845	1.31e-06	0.793053	down-memory	2.57	0.91	3.18	1.75	0.76	2.09	5.21	3.59	1.79	others
CsaV3_3G020300	38.78	78.09	80.73	29.77	31.05	32.85	26.21	25.02	33.62	0.000993943	0.0130781	0.91627	down-memory	27.05	34.29	35.89	29.01	39.13	27.78	43.66	39.65	39.16	others
CsaV3_3G021460	328.01	434.82	294.1	177.95	100.52	281.25	200.97	180.04	170.36	0.0189275	0.00456936	0.795256	down-memory	1523.6	1138.18	1218.1	4770.83	5155.47	4401.6	610.12	545.89	701.39	up
CsaV3_3G031920	95.96	100.89	108.91	55.95	86.42	78.81	55.26	68.39	65.84	0.00863072	0.00609709	0.998794	down-memory	51.95	55.37	27.04	36.52	45.86	60.69	42.02	37.91	35.28	others
CsaV3_3G032730	296.3	153.78	159.22	151.48	126.63	131.09	51.97	62.73	116.42	0.0476524	0.00887772	0.147011	down-memory	84.41	119.24	163.55	142.63	72.25	46.06	102.68	275.48	70.3	others
CsaV3_3G033440	23.84	37.77	20.83	17.97	20.23	22.44	17.84	15.97	14.51	0.0428712	0.0216065	0.439482	down-memory	3.29	3.35	2.63	2.03	1.38	1.79	2.1	4.25	2.9	others
CsaV3_3G034340	536.65	484.16	585.43	374.32	436.51	295.79	291.62	327.97	158.38	0.00241143	0.0224396	0.586577	down-memory	330.58	175.45	196.98	1020.96	1147.78	649.37	330.87	129.6	195.13	up
CsaV3_3G046460	219.21	181.66	89.32	10.53	35.12	5.86	55.32	20.05	20.04	1.46e-07	1.45e-05	0.453126	down-memory	2.84	3.12	2.1	0	0.24	0	0.6	0.34	2.08	down
CsaV3_3G047190	12.3	24.58	12.27	7.38	15.11	6.99	2.64	1.51	0.84	0.0454728	1.8e-10	8.6e-06	down-memory	0.28	0.25	0.21	0	0.13	0.06	0.54	1.8	1.68	others
CsaV3_3G050070	29.52	30.57	23.77	21.08	24.52	21.64	16.22	17.58	18.19	0.0425458	0.0377783	0.69799	down-memory	32.29	23.92	23.48	26.77	29.53	37.09	22.77	23.64	39.14	others
CsaV3_4G001340	18.85	18.93	12.5	13.37	8.54	3.47	8	6.47	3.11	0.0435143	0.013949	0.772911	down-memory	44.25	20.85	14	23.33	43.67	36.29	36.63	18.89	35.66	others
CsaV3_4G002200	14.66	25.65	28.2	5.64	10.6	7.75	10.61	9.2	13.69	9.58e-06	0.0332657	0.100786	down-memory	9.17	5.99	8.41	4.34	5.25	6.37	9.82	8.48	8.11	others
CsaV3_4G004250	21.17	34.59	12.15	1.06	5.83	0.53	2.23	1.54	0	2.97e-05	2.58e-07	0.730533	down-memory	0	0	0	0	0	0	0	0	0	others
CsaV3_4G004640	163.02	105.77	147.12	74.9	67.03	72.19	64.95	89.89	83.24	2.76e-05	0.043184	0.24306	down-memory	0	0	0	0	0	0	0	0	0	others
CsaV3_4G007140	19.78	28.74	18.24	5.42	7.35	4.13	1.78	2.28	2.38	7.85e-11	8.02e-23	0.018378	down-memory	0.42	0.27	0.76	0.13	0.2	0.37	0.76	0.26	0.46	others
CsaV3_4G025150	61.28	114.58	117.45	27.04	26.19	16.9	28.17	29.01	30.01	5.81e-10	1.9e-07	0.238742	down-memory	20.13	23.61	21.94	26.68	20.71	24.22	18.49	23	30.49	others
CsaV3_4G027450	77.34	103.58	83.49	24.84	50.18	38.69	38.49	50.15	44.5	9.08e-06	0.000325853	0.279896	down-memory	45.37	42.29	31.66	27.18	29.13	34.58	48.41	38.97	35.21	others
CsaV3_4G028560	2.93	3.65	2.76	0	0.4	0.34	0	0.32	0.4	5.92e-09	3.85e-07	0.912492	down-memory	0	0.24	0.22	0	0	0	0	0.16	0.32	others
CsaV3_4G036180	3.07	3.66	2.54	1.39	1.01	1.01	1.45	1.57	1.61	2.3e-05	0.0327118	0.252729	down-memory	0.71	0.35	0.71	0.22	0.16	1.61	0.29	0.19	0.49	others
CsaV3_5G000460	176.27	359.75	214.94	21.14	90.43	20.92	163.07	73.63	77.85	9.74e-06	0.0262169	0.161847	down-memory	12.44	16.64	11.27	11.03	13.92	15.81	18.1	26.17	13.22	others
CsaV3_5G003160	104.36	253.18	288.22	94.42	162.53	97.4	73.75	68.04	99.9	0.0175477	0.00202973	0.383635	down-memory	31	56.21	42.59	16.92	19.32	27.95	54.38	54.09	34.18	down
CsaV3_5G003320	129.99	263.65	136.2	25.34	39.95	15.47	94.51	32.87	32.06	8.13e-08	0.0223207	0.0817013	down-memory	6.86	10.72	13.07	1.99	4	4.01	5.17	7.73	10.81	down
CsaV3_5G004860	106.16	100	85.49	56.81	60.08	60.82	46.14	57.11	70.1	5.41e-05	0.0285127	0.672398	down-memory	99.88	97.19	95.62	91.43	180.38	92.69	78.39	87.21	96.3	others
CsaV3_5G008180	146.41	157.24	170.01	78.25	92.95	99.47	86.22	84.46	124.87	3.51e-07	0.0216026	0.312664	down-memory	27.86	46.07	37.23	24.69	30.56	31.6	42.03	42.12	28.72	others
CsaV3_5G008450	139.63	114	97.2	63.15	65.43	47.18	68.31	74.62	53.09	1.53e-05	0.0328597	0.287266	down-memory	122.79	100	73.32	181.74	177.23	198.44	114.93	108.39	93.3	up
CsaV3_5G008690	64.38	170.26	274.55	46.87	81.75	51.68	9.54	5.74	4.49	0.00332288	4.11e-15	1.11e-09	down-memory	0	4.89	0.76	1.51	0.41	1.97	5.21	1.55	1.38	others
CsaV3_5G020690	59.86	92.94	118.07	28.31	26.27	16.7	11.38	12.23	13.03	5.8e-10	1.28e-19	0.0189234	down-memory	13.35	9.81	14.75	12.5	11.38	7.32	10.51	10.76	15.08	others
CsaV3_5G026450	679.21	735.91	788.23	621.76	271.92	207.41	230.56	300.3	222.52	0.0101989	1.01e-10	0.612126	down-memory	172.79	208.44	313.54	70.44	84.12	97.88	138.85	184.36	365.38	down
CsaV3_5G026520	86.34	146.07	195.17	120.81	75.15	43.03	4.61	8.28	4.94	0.0389152	2.27e-34	1.76e-17	down-memory	22.23	12.98	11.44	11.38	16.03	13.73	8.44	9.22	22.28	others
CsaV3_5G031530	157.97	319.63	185.37	34.86	72.16	42.22	46.68	29.67	40.62	3.62e-17	2.44e-17	0.740764	down-memory	35.18	32.44	27.65	19.58	15.12	22.39	20.73	30	37.51	others
CsaV3_5G033270	6.21	1.89	0.93	0.81	0	0.27	0.38	0.23	0.74	0.00746516	0.0294162	0.833945	down-memory	12.53	11.9	5.53	5.21	4.47	7.57	1.14	2.88	3.52	others
CsaV3_6G000930	264.94	324.76	338.7	124.01	184.09	205.97	169.71	185.95	170.4	0.000133284	0.000474711	0.519097	down-memory	93.47	93.54	82.2	126.76	120.02	88.87	130.2	122.53	72.12	others
CsaV3_6G001370	445.5	452.11	426.98	300.67	364.02	397.09	261.67	284.84	371.8	0.0148128	0.0262169	0.947721	down-memory	77.45	111.9	112.27	102.03	107.59	76.69	114.67	132.32	95.33	others
CsaV3_6G002010	20.68	23.12	20.61	10.04	16.41	8.34	14.89	9.69	8.8	0.00127951	0.0250243	0.799478	down-memory	9.94	10.01	6.83	4.74	11.11	7.07	8.3	8.07	6.55	others
CsaV3_6G003170	8.15	10.68	7.43	3.14	3.75	3.1	3.93	3.61	3.2	2.28e-08	0.00015179	0.489081	down-memory	3.17	2.86	3.31	0.5	0.74	1.88	0.87	1.78	1.85	down
CsaV3_6G004700	39.13	62.38	76.84	18.61	24.94	19.32	24.35	22.34	23.89	5.02e-09	2.77e-05	0.161849	down-memory	4.82	9.6	5.77	2.14	3.2	8.34	7.38	8.51	4.6	others
CsaV3_6G009000	688.32	737.62	401.84	81.94	176.9	56.38	212.02	148.8	88.8	2.14e-09	8.89e-06	0.197969	down-memory	2.64	2.83	5.19	2.1	1.65	3.49	5.16	3	1.88	others
CsaV3_6G012860	50.8	83.08	58.23	12.19	32.18	19.44	26.16	11.33	17.71	1.94e-05	3.43e-05	0.992065	down-memory	8.5	13.38	10.6	3.39	1.38	7.91	34.43	23.09	7.93	others
CsaV3_6G015000	31.37	54.83	39.96	10.48	13.9	13.17	24.91	15.56	16.67	3.6e-08	0.023631	0.0850109	down-memory	26.08	17.67	13	16.25	14.15	16.72	23.97	11.79	22.99	others
CsaV3_6G015010	43.95	93.65	62.61	18.02	45.32	27.56	40.37	24.09	24.15	2.25e-05	0.000895573	0.416278	down-memory	16.23	13.44	14.8	12.8	13.69	15.42	11.96	16.78	10.54	others
CsaV3_6G016890	60.33	47.85	40.15	12.12	23.16	9.25	19.28	19.46	10.15	8.86e-07	0.000134544	0.530884	down-memory	1.15	0.71	1.75	0	0.37	0.25	0.56	0.7	2.75	down
CsaV3_6G022370	42.53	48.41	18.52	6.42	11.64	9.23	8.96	6.78	11.12	4.91e-06	9.55e-05	0.809853	down-memory	4.39	3.97	2.97	3.77	3.84	3.51	4.03	3.51	2.42	others
CsaV3_6G022540	70.45	71.87	34.58	26.95	47.41	37.03	24.18	22.01	20.64	0.048791	0.00141946	0.193192	down-memory	1.12	1.88	1.5	1.38	3.11	3.39	6.55	5.48	3.33	others
CsaV3_6G031170	64.26	54.38	14.73	0	1.58	0.12	4.26	1.7	0.06	0.000535492	0.0283695	0.516837	down-memory	0	0	0	0	0	0	0	0	0	others
CsaV3_6G031860	22.01	22.94	24.03	12.59	16.5	18.51	10.05	15.56	13.63	0.00273752	0.0145111	0.921573	down-memory	22.05	22.7	13.9	11.32	12.19	12.29	12.65	13.69	15.09	others
CsaV3_6G038030	63.8	105.37	92.34	50.43	68.74	52.9	1.76	8.32	4.98	0.00623155	2.71e-17	1.6e-12	down-memory	4.77	3.82	2.74	2.01	6.22	1.8	26.09	22.81	0.74	others
CsaV3_6G041940	131.58	126.36	54.36	36.73	55.28	38.78	29.94	22.83	10.43	0.000535778	3.82e-05	0.103873	down-memory	1.26	3.31	1.04	0.75	1.42	2.23	4.02	2.3	0.55	others
CsaV3_6G043880	355.87	387.96	308.31	136.34	236.14	145.93	150.34	141.64	115.36	2.54e-05	4.6e-08	0.81567	down-memory	75.63	58.3	40.29	91.04	112.6	100.25	55.7	45.2	46.79	up
CsaV3_6G048200	30.54	24.92	21.01	8.33	13.08	7.34	12.72	10.74	11	6.02e-06	0.00164935	0.309639	down-memory	1.15	2.13	1.03	0.34	0.46	0.63	3.37	1.13	1.99	others
CsaV3_6G050040	59.44	70.7	71.1	46.9	52.12	51.86	47.33	36.21	43.43	0.00613456	0.0443641	0.941721	down-memory	47.66	64.23	51.18	55.85	60.01	53.11	70.14	74.66	41.1	others
CsaV3_6G050390	220.56	275.66	248.92	37.97	34.15	22.53	36.45	48.33	33.26	1.43e-36	5.24e-27	0.168579	down-memory	35.54	27.71	27.37	28.69	35	40.95	38.23	38.68	39.75	others
CsaV3_6G051970	83.33	86.2	35.75	16.53	18.8	9.61	22.83	22.8	13.6	3.83e-08	0.000334043	0.172457	down-memory	6.44	6.25	6.46	2.54	5.23	5.49	3.92	3.52	13.38	others
CsaV3_7G001310	113.03	172.09	145.79	75.74	101.11	100.27	23.38	33.97	44.59	0.00105682	1.47e-11	8.85e-05	down-memory	62.18	49.47	45.9	60.13	67.64	41.69	41.29	34.99	24.24	others
CsaV3_7G005640	29	37.04	26.1	10.14	18.35	11.15	16.02	14.85	14.77	2.57e-05	0.00137768	0.342552	down-memory	14.66	18.48	15.07	7.31	12.92	11.49	15.03	21.4	17.33	others
CsaV3_7G008500	156.99	143.08	167.92	94.08	152.91	102.78	88.75	89.9	111.56	0.0260514	0.00417399	0.870037	down-memory	28.59	32.79	27.63	21.73	49.75	32.86	34.94	35.2	39.71	others
CsaV3_7G010080	24.83	28.39	23.68	14.73	16.71	13.56	17.47	16.18	15.19	9.64e-07	0.018145	0.225149	down-memory	5.27	6.59	4.88	4.37	4.38	4.41	5.31	6.58	6.16	others
CsaV3_7G023780	199.43	325.38	221.25	79.89	125.94	79.23	136.3	95.27	103.54	1.03e-07	0.000456824	0.199452	down-memory	227.62	169.28	160.75	72.08	75.34	73.39	179.53	163.22	232.08	down
CsaV3_7G025960	38.75	40.45	31.67	20.92	24.01	19.97	18.96	22.7	20.44	2.27e-05	0.00520939	0.675305	down-memory	29.99	24.05	21.71	11.66	14.24	12.32	12.17	11.22	20.08	down
CsaV3_7G026490	83.25	95.52	70.33	9.75	45.37	18.03	17.86	16.1	20.45	0.00107223	1.88e-19	0.716522	down-memory	7.66	18.82	37.4	12.23	4.15	6.41	59.6	85.44	55.87	others
CsaV3_7G031790	115.92	371.17	338.02	60.03	159.64	89.9	79.38	55.21	125.55	0.00657192	0.0115953	0.949403	down-memory	89.02	115.67	173	225.45	165.01	191.37	189.54	205.66	228.79	up
CsaV3_7G033150	167.34	184.58	255.08	190.27	91.85	91.73	96.11	136.12	99.32	0.0329917	0.0216276	0.945186	down-memory	84.92	84.8	93.37	59.56	52.05	64.56	53.6	68.93	91.64	others

## Sheet: up-down
Table 2c The expression of up-down genes in WT and Csrboh5.1 mutants
Gene	WT_CK_1	WT_CK_2	WT_CK_3	WT_R4h_1	WT_R4h_2	WT_R4h_3	WT_R48h_1	WT_R48h_2	WT_R48h_3	qvalue_CK-vs-R4h	qvalue_CK-vs-R48h	qvalue_R4h-vs-R48h	gene_expression_type	Csrboh5.1_CK_1	Csrboh5.1_CK_2	Csrboh5.1_CK_3	Csrboh5.1_R4h_1	Csrboh5.1_R4h_2	Csrboh5.1_R4h_3	Csrboh5.1_R48h_1	Csrboh5.1_R48h_2	Csrboh5.1_R48h_3	gene_expression_type
CsaV3_1G000060	0	0	0	8.13	2.84	2.36	0.25	0.42	0.24	0.000206727	NA	0.00441759	up-down	0.9	0.92	0.54	0.53	2.45	2.18	0.29	1.5	0.97	others
CsaV3_1G000130	21.84	9.78	8.83	51.02	29.77	41.38	5.59	6.46	7.27	0.0200102	0.215564	7.69e-06	up-down	43.6	23.66	36.18	29.67	38.24	28.45	34.38	33.14	39.42	others
CsaV3_1G000590	6.55	6.08	6.06	16.61	16.13	13.77	6.22	8.58	6.51	0.000268219	0.938478	0.00852506	up-down	9.16	7.6	6.33	12.06	12.56	11.38	4.62	6	10.01	up
CsaV3_1G000600	157.87	133.11	78.84	255	304.08	235.05	25.26	50.31	64.81	0.0322457	0.00965119	3.39e-11	up-down	50.69	63.31	80.67	96.93	77.32	50.51	39.92	54.04	47.79	others
CsaV3_1G000650	0	0.32	0.3	11.6	9.95	12.27	0.61	0.78	4.22	1.74e-05	NA	0.00364575	up-down	5.4	15.37	7.69	3.29	1.46	1.12	0	3.68	11.17	down
CsaV3_1G000820	36.24	51.37	54.74	71.54	105.05	117.74	27.92	37.85	50.37	0.0161556	0.74327	0.000793858	up-down	29.97	31.63	39.78	35.55	28.45	26.59	37.16	41.89	36.75	others
CsaV3_1G000910	11.22	11.45	10.1	56.09	37.51	25.64	9.3	12.49	16.06	1.3e-05	0.914168	0.000140138	up-down	31.7	17.73	36.93	3.23	6.62	3.61	3.36	6.53	40.71	down
CsaV3_1G001460	2.19	1.46	1.68	5.96	5.1	4.86	1.89	1.94	2.31	0.00504412	0.966661	0.0113067	up-down	3.1	2.9	4.5	0.24	0.2	0.73	1.55	2.7	4.75	down
CsaV3_1G001800	18.25	25.54	22.39	40.56	52.03	36.12	23.37	18.31	26.33	0.0179189	0.993124	0.013255	up-down	15.1	13.28	16.81	10	8.75	7.37	14.71	19.14	20.16	others
CsaV3_1G001870	22.84	32.92	36.29	86.31	79.03	62.26	15.49	24.49	41.79	0.000142564	0.921225	0.00114868	up-down	44.43	40.52	55.21	15.73	17.91	29.19	18.57	26.7	63.19	down
CsaV3_1G002050	4.62	2.68	4.04	12.02	10.56	9.4	2.35	2.7	3.82	0.00154078	0.803442	3.68e-06	up-down	15.14	13.93	14.29	6.15	12.33	7.6	11.6	13.07	9.95	others
CsaV3_1G002080	15.64	13.47	14.59	82.86	67.6	50.61	17.42	18.46	16.51	3.12e-14	0.795984	4.45e-11	up-down	18.87	17.41	20.26	17.81	18.16	14.76	15.22	17.91	17.06	others
CsaV3_1G002110	5.03	8.22	7.52	61.18	62.97	29.49	8.11	7.86	10.17	1.37e-12	0.782673	4.14e-12	up-down	29.9	64.87	72.93	8.67	19.57	11.68	10.06	35.44	46.04	down
CsaV3_1G002200	7.78	4.85	4.51	49.13	18.02	13.7	3.97	6.43	5.64	0.000707054	0.951257	2.15e-05	up-down	15.2	16.18	14.06	2.66	5.48	3.35	1.96	4	17.01	down
CsaV3_1G002210	3.32	1.42	1.64	28.51	12.73	7.39	1.28	2.33	2.37	1.61e-05	0.968734	3.66e-08	up-down	6.42	12.65	11.76	0.55	1.92	0.77	0.5	2.53	9.32	down
CsaV3_1G002640	2.24	2.86	3.32	10.94	10.31	4.91	2.21	1.63	2.76	0.00105929	0.72894	1.04e-05	up-down	3.11	4.44	7.54	0.84	1.22	0.27	0.9	1.72	6.5	down
CsaV3_1G002730	0.25	0.75	0.42	7.9	2.06	1.08	0.72	0.59	0.7	0.0207893	NA	0.0344448	up-down	7.27	7.5	13.57	2.24	0.51	0.98	0.21	1.63	14.37	down
CsaV3_1G002910	0.22	0.27	0.17	1.67	1.91	0.45	0.26	0.04	0.04	0.00934834	NA	0.00127704	up-down	5.62	7.28	15	0	0.08	0.11	0.59	2.74	3.75	down
CsaV3_1G003380	2.16	1.21	1.08	7.35	9.65	3.29	1.86	2.05	1.53	9.52e-05	0.807239	0.000469789	up-down	1.3	2.08	1.43	0.31	0.06	0.08	1.1	1.18	0.46	down
CsaV3_1G003780	3.55	9.87	5.75	80.11	116.27	33.73	12.29	10.51	12.34	5.62e-07	0.710505	8.1e-06	up-down	56.07	34.49	95.22	6.08	13.66	7.44	12.46	16.7	144.99	down
CsaV3_1G003810	9.85	17.12	14.51	36.84	61.43	32.55	8.25	8.89	10.77	0.000279094	0.426642	4.62e-09	up-down	34.98	41.21	65.43	16.44	17.75	23.19	21.7	24.12	52.76	down
CsaV3_1G003920	1.03	1.76	0.33	17.85	22.52	15.96	0.5	0.97	1.31	5.48e-13	0.979387	3.09e-15	up-down	19.68	20.98	32.88	8.72	11.16	4.03	2.06	9.8	33.01	down
CsaV3_1G003980	1.11	1.99	1.32	10.82	9.51	3.96	1.03	1.14	1.73	2.07e-05	0.945669	7.66e-07	up-down	10.56	8.38	12.92	3.62	4.92	3.35	2.48	4.16	10.24	down
CsaV3_1G004150	38.42	50.25	35.29	300.2	147.29	104.95	10.29	25.65	41.62	2.84e-05	0.559663	4.5e-07	up-down	120.12	104.37	179.98	22.06	10.58	8.23	7.08	20.54	121.98	down
CsaV3_1G004430	1.04	1.58	2.97	31.33	22.98	20.52	1.51	2.59	2.6	1.47e-08	0.973496	1.72e-08	up-down	72.05	68.05	69.77	44.78	54.02	80.15	91.73	77.63	79.72	others
CsaV3_1G004720	29.88	44.2	28.25	114.49	118.7	69.39	20.63	19.27	36.7	0.00187219	0.828353	1.78e-05	up-down	52.77	55.17	84.46	29.11	19.28	12.53	8.5	21.72	57.39	down
CsaV3_1G004810	10.25	6.46	11.93	22.59	26.12	25.87	3.25	11.17	13.08	0.00118466	0.915185	0.00313941	up-down	19.77	17.66	17.02	9.11	11.96	7.28	12.41	9.3	20.57	others
CsaV3_1G004910	22.78	24.24	20.91	60.67	68.37	64.49	29.2	20.39	21.21	3.05e-06	0.991813	0.000109921	up-down	27.02	30.33	39.92	30.64	31.01	38.38	20.53	33.44	33.57	others
CsaV3_1G005040	9.91	10.84	10.08	74.53	51.3	27.24	8.07	10.49	11.65	3.39e-07	0.970706	3.66e-08	up-down	19.33	17.76	31.7	3.95	3.92	3.83	4.36	7.68	20.3	down
CsaV3_1G005160	35.44	45.5	39.63	111.25	79.03	68.44	29.31	36.07	60.3	0.0062193	0.994401	0.032417	up-down	68.37	73.35	155.34	6.36	10.53	9.6	42.56	77.67	126.09	down
CsaV3_1G005420	8.01	5.73	2.81	258.44	93.44	67.81	6.06	8.39	8.47	2.5e-14	0.796423	2.26e-18	up-down	37.67	51.12	51.56	10.76	7.17	3.65	2.29	17.07	40.86	down
CsaV3_1G005440	14.05	16.88	4.05	499.19	239.73	192.05	7.18	11.26	20.41	5.72e-16	0.9826	2.45e-23	up-down	84.52	143.21	286.04	23.58	19.87	11.17	21.83	107.53	249.06	down
CsaV3_1G005550	2.22	2.02	2.16	93.3	30.64	26.87	3.54	3.02	3.23	2.2e-11	0.85994	5.61e-11	up-down	23.35	16.9	40.19	1.97	2.29	2.31	2.02	9.68	70.34	down
CsaV3_1G005640	8.87	13.02	11.5	25	30.74	34.48	8.03	15.53	14.34	0.000155198	0.944368	0.00827765	up-down	22.49	27.32	35.67	40.38	56.27	40.72	28.32	41.81	37.46	up
CsaV3_1G005760	16.27	27.66	28.61	47.28	75.68	39.48	33.48	19.64	28.98	0.0159169	0.917982	0.0388569	up-down	22.31	22.1	26.66	6.38	8.96	8.5	20.24	21.03	29.61	down
CsaV3_1G005990	0.26	0.36	0	8.52	4.28	1.88	0.63	0.51	0.28	9.41e-07	0.82374	1.01e-06	up-down	2.97	1.92	1.65	0	0.3	0	0.05	0.56	5.59	down
CsaV3_1G006200	12.29	7.95	8.06	22.35	19.25	21.68	9.93	12.95	12.65	0.0145758	0.839428	0.0497177	up-down	12.22	14.48	10.02	10.51	22.32	15.44	13.4	15.65	9.71	others
CsaV3_1G006230	0	0	0	2.96	2.31	1.46	0.22	0	0.22	0.00236315	NA	0.0251573	up-down	0	0	0	0.5	0.27	0	0	0	0.18	others
CsaV3_1G006380	3.9	1.89	2.27	15.89	8.56	6.67	3.44	4.12	3.43	0.00133063	0.790664	0.00218324	up-down	2.12	3.79	3.96	0.68	1.02	0.25	0.45	1.34	3.57	down
CsaV3_1G006500	16.26	20.13	22.41	45.57	46.1	53.05	9	14.61	15.38	7.23e-06	0.276411	1.07e-08	up-down	16.28	19.83	18.08	39.17	53.05	32.44	20.29	16.73	22.67	up
CsaV3_1G006550	11.38	8.9	8.69	33.08	26.41	17.61	6.5	7.78	11.81	0.000699582	0.884246	6.89e-05	up-down	10.44	7.25	13	2.02	2.14	1.66	1.79	4.62	17.18	down
CsaV3_1G006570	1.3	0.22	0.21	18.91	12.03	10.74	1.05	1.58	1.23	4.97e-08	NA	5.77e-08	up-down	15.06	10.18	28.99	0	0.65	0.54	0.13	3.21	37.53	down
CsaV3_1G006580	17.12	24.84	9.52	387.66	527.58	251.52	12.6	12.47	29.27	1.19e-17	0.994632	6.66e-19	up-down	614.35	205.12	601.65	44.52	27.16	11.48	23.06	64.33	713.28	down
CsaV3_1G006610	41.65	83.54	77.95	114.35	174.63	130.95	48.61	46.99	62.6	0.0305735	0.667977	2.88e-06	up-down	2.76	2.54	5.92	0.98	3.72	1.46	0	2.51	3.58	others
CsaV3_1G006660	12.3	15.75	2.63	82.24	85.24	31.92	3.01	3.92	4.78	0.000322394	0.23642	1.8e-19	up-down	70.31	124.64	160.47	6.39	8.35	0.6	0.88	14.25	114.58	down
CsaV3_1G006780	0	0	0	4.99	3.43	1.35	0	0	0	1.15e-05	NA	5.79e-06	up-down	1.11	1.27	2.23	0	0	0	0	0	0.72	down
CsaV3_1G006840	1.15	1.64	1.51	3.16	3.88	3.03	1.14	1.26	1.17	0.0468178	0.920783	0.013864	up-down	3.62	2.42	2.14	0.41	1.29	1.08	0.97	2.02	3.19	others
CsaV3_1G007050	1.7	2.09	1.77	8.11	11.08	5.16	1.27	2.26	2.11	1.25e-05	0.998717	3.1e-05	up-down	3.74	4.22	2.77	0.66	1.03	1.41	2.82	3.11	6.94	down
CsaV3_1G007320	12.1	14.1	15.28	41.92	36.21	35.25	11.95	12.41	12.61	9.11e-09	0.793309	8.6e-11	up-down	7.19	6.29	6.45	7.31	8.45	6.39	6.95	7.94	6.09	others
CsaV3_1G007530	12.4	10.18	11.49	40.41	35.44	23.41	9.94	13.09	13.87	6.47e-05	0.9691	0.000138849	up-down	29.47	24.53	32.13	11.64	13.95	14.82	17.95	26.08	29.25	down
CsaV3_1G007560	11.6	22.39	11.17	119.63	115.14	52.38	13.54	10.34	20.9	1.26e-07	0.9906	1.55e-09	up-down	91.99	65.84	129.89	26.92	25.57	20.46	19.29	43.97	158.73	down
CsaV3_1G007570	32.14	54.04	48.91	138.26	259.91	164.34	28.57	23.27	42.19	2.23e-07	0.482907	1.36e-12	up-down	40.28	59.57	102.77	21.32	27.68	17.8	48.87	83.64	62.67	down
CsaV3_1G007630	13.74	20.48	16.29	32.65	38.64	29.67	22.85	18.18	22.15	0.00912771	0.901546	0.0271248	up-down	14.86	17.13	14.98	13.52	12.91	11.55	17.37	15.8	17.49	others
CsaV3_1G008030	5.07	8.17	8.44	71.69	66.52	38.12	3.18	5.17	10.77	6.05e-16	0.942926	4.02e-12	up-down	44.91	22.6	63.16	4.18	10.98	4.18	6.92	14.44	59.45	down
CsaV3_1G008040	3.35	2.75	1.39	308.22	172.07	95.35	1.2	2.93	2.98	1.17e-33	0.978161	1.05e-41	up-down	13.08	2.8	15.76	1.02	1.3	0.25	0.44	2.97	20.56	down
CsaV3_1G008050	41.84	37.31	27.7	180.17	82.38	74.93	27.73	57.51	41.12	0.00251514	0.913745	0.0111021	up-down	22.71	15.62	33.35	5.2	6.9	3.46	10.07	14.07	49.42	down
CsaV3_1G008240	8.52	13.13	11.19	42.63	44.1	30.95	12.13	9.34	20.23	9.27e-09	0.8393	0.000230577	up-down	11.5	8.75	13.4	2.24	4	3.02	6.01	10.51	13.29	down
CsaV3_1G008250	14.03	9.39	13.19	20.5	30.08	33.78	11.77	11.63	13.85	0.000218719	0.979982	0.000384517	up-down	6.13	4.21	3.97	5.62	4.17	6.85	5.69	7.41	5.35	others
CsaV3_1G008270	52.76	42.92	59.95	123.51	229.6	298.79	21.01	43.58	81.05	8.96e-05	0.9691	0.000296814	up-down	19.37	5.59	27.1	19.9	12.16	16.7	24.72	30.9	14.95	others
CsaV3_1G008470	5.66	6.03	4.37	16.82	14.39	16.37	4.99	5.04	4.1	0.00019675	0.924927	2.42e-05	up-down	51.95	32.5	14.12	35.9	43.74	56.36	23.7	20.81	17.49	others
CsaV3_1G008780	0.19	1.14	0.96	2.16	8.02	3.39	0.66	0.27	0.85	0.00991544	0.951028	0.000794249	up-down	0	0	0	0.31	0.83	0.57	0	0.39	0	up
CsaV3_1G008830	61.05	47.16	47.37	329.8	282.84	258.56	39.77	54.24	51.05	2.59e-21	0.919062	1.56e-25	up-down	93.44	95.45	79.04	83.14	123.63	61.68	60.33	61.05	66.7	others
CsaV3_1G009100	15.72	10.68	11.45	24.99	31.86	22.95	10.15	9.18	10.13	0.0211619	0.619102	3.73e-06	up-down	4.75	11.4	9.35	5.84	6.52	15.07	12.64	19.19	5.92	others
CsaV3_1G009320	108.96	89.93	85.3	246.8	197.86	230.27	78.83	111.61	118.65	0.000187369	0.968734	0.00110377	up-down	111.32	111.11	114.72	162.85	175.21	123.12	68.82	82.67	92.99	up
CsaV3_1G009520	27.97	14.83	12.84	36.11	72.78	39.63	12.14	15.22	17.13	0.0281993	0.802208	1.1e-05	up-down	10.82	14.46	13.25	12.98	17.18	23.37	16.01	76.95	15.61	up
CsaV3_1G009640	32.31	50.18	46.05	71.83	96.62	80.73	29.44	21.46	39.3	0.0153383	0.424514	2.63e-05	up-down	16.56	31.8	26.05	15.9	7.74	8.93	35.57	35.68	19.7	others
CsaV3_1G009950	192.92	166.35	156.11	573.49	445.77	277.89	206.08	206.42	201.65	0.00317459	0.781545	0.00998249	up-down	346.55	403.24	600.03	143.86	210.58	193.85	188.85	457.13	569.81	down
CsaV3_1G010080	0.86	0.66	0.61	29.22	18.48	13.33	0.38	0.66	0.49	3.21e-23	0.880146	4.13e-27	up-down	1.71	0.89	6.03	1.08	0.48	0	0.11	4.88	3.02	others
CsaV3_1G010270	6.9	7.47	6.35	13.85	15.42	12.27	7.37	5.74	7.07	0.00684067	0.968851	0.00465768	up-down	5.54	6.15	6.02	2.03	0.62	1.25	4.73	6.62	4.21	down
CsaV3_1G010500	0	0	0	3.93	2.67	3.07	0	0	0	0.00717014	NA	0.00662213	up-down	0.58	0	0.34	0	0	0	0	0	0	others
CsaV3_1G010710	158.97	82.02	95.27	421.35	350.99	362.48	93.23	105.88	98.82	2.32e-06	0.919546	6.13e-12	up-down	660.56	550.73	502	567.92	911.58	453.57	429.41	349.26	553.67	others
CsaV3_1G011160	11.28	6.49	5.93	63.78	54.48	25.99	5.99	6.7	7.68	4.7e-07	0.871563	3.12e-13	up-down	18.94	17.9	43.82	1.21	1.5	0.97	3.34	12.52	40.32	down
CsaV3_1G011180	4.48	2.92	0.82	124.98	33.2	20.72	2.51	2.64	2.57	1.1e-07	0.978571	1.07e-12	up-down	55.95	75.97	92.03	1.64	1.59	0	1.01	10.31	159.65	down
CsaV3_1G011200	1.16	2.06	1.53	11.28	8.13	4.16	1.37	1.7	1.88	1.82e-05	0.990973	2.35e-06	up-down	0.14	1.25	3.46	0	0	0	0.07	0.25	1.5	down
CsaV3_1G011270	6.39	11.4	8.68	88.15	96.24	35.75	5.43	6.19	9.49	1.7e-11	0.751408	1.5e-16	up-down	59.87	56.8	89.55	1.84	3.2	1.44	2.86	19.03	116.5	down
CsaV3_1G011280	5.81	6.51	3.88	76.2	38.04	24.53	3.19	3.25	5.21	1.49e-10	0.500392	4.39e-17	up-down	43.35	40.67	75.26	1.52	2.43	0.93	1.18	15.04	125.89	down
CsaV3_1G011640	0	0	0	1.31	0.53	0.12	0	0.14	0	0.00131394	NA	0.0338162	up-down	0.24	0.24	0.25	0	0	0	0	0.07	0.1	others
CsaV3_1G011690	0.16	0	0	2.75	1.2	0.34	0	0	0	0.0491917	NA	0.0127192	up-down	5.78	3.48	7.36	0	0.12	0	0.12	2.12	20.91	down
CsaV3_1G011740	53.11	42.25	39.31	253.25	142.03	115.07	35.91	58.4	46.59	2.44e-05	0.990973	1.43e-05	up-down	18.7	33.67	28.1	9.34	11.95	11.03	22.65	34.42	36.34	down
CsaV3_1G011780	2.22	3.25	2.53	54.4	43.8	29.96	2.03	1.9	2.21	6.44e-30	0.776265	1.85e-38	up-down	5.34	13.25	11.74	0.89	4.55	1.62	0.49	0.96	8.24	down
CsaV3_1G012330	3.68	5.02	4.77	9.03	11.8	6.76	2.69	2.69	6.27	0.0384533	0.907764	0.0309269	up-down	7.17	5.38	7.09	1.6	4.38	1.07	3.11	4.23	6.23	others
CsaV3_1G012850	19.46	21.1	19.79	47.14	45.77	32.15	22.55	20.99	23.83	0.00412906	0.911056	0.0188899	up-down	24.52	16.52	12.04	16.74	16.7	9.92	19.27	20.48	16.36	others
CsaV3_1G012950	4.08	3.8	3.72	22.77	13.06	9.01	3.57	6.62	4.75	0.000187538	0.831431	0.00455968	up-down	8.15	5.69	9.09	0.59	2.15	0.59	0.77	2.44	10.3	down
CsaV3_1G012960	11.93	4.94	8.6	29.44	15.77	20.86	8.54	9.83	9.93	0.032801	0.971675	0.00490031	up-down	8.46	7.12	16.3	2.62	2.59	3.77	4.29	5.96	10.57	down
CsaV3_1G014010	38.02	36.03	57.88	296.97	322.15	198.73	30.16	24.02	22.52	9.13e-10	0.546218	2.83e-16	up-down	729.83	644.25	657.29	1911.95	2084.43	2089.7	380.54	438.64	906.69	up
CsaV3_1G014330	27.08	16.83	27.99	884.79	908.67	540.83	14.6	33.77	48.79	7.43e-50	0.838384	1.87e-28	up-down	150.55	68.2	126.79	13.65	15.24	6.07	10.58	27.43	174.69	down
CsaV3_1G014490	23.44	32.88	63.5	108.43	149.22	115.95	12.27	18.01	14.13	0.00404412	0.00229841	9.65e-31	up-down	4.48	2.52	2.94	13.77	8.14	11.19	3.51	2.99	2.33	up
CsaV3_1G014510	4.03	6.7	5.53	42.3	34.09	18.51	6.04	7.05	13.27	1.56e-08	0.524217	0.000174917	up-down	15.43	19.48	30.37	6.57	2.86	2.26	2.32	7.96	20.81	down
CsaV3_1G014560	0	0	1.19	21.63	9.93	9.2	0	0.69	0	8.96e-05	NA	5.57e-05	up-down	1.93	0.59	1.89	0	0	0	0.19	0.35	2	down
CsaV3_1G015020	15.53	16.75	18.69	30.66	29.26	28.63	12.64	11.98	15.6	0.0313709	0.55751	0.000537234	up-down	13.38	13.52	10.05	10.97	19.05	13.94	11.52	9.8	10.52	others
CsaV3_1G016970	14.48	13.9	11.56	43.45	43.9	32.59	9.2	8.97	6.53	2.08e-05	0.369759	1.54e-09	up-down	17.29	16.96	22.23	67.77	44.34	59.29	23.13	14.5	11.05	up
CsaV3_1G024410	19.36	31.99	29.56	40.31	63.1	50.05	19.81	17.2	27.92	0.0452089	0.740927	0.000882992	up-down	69.31	62.58	72.36	46.46	52.4	42.15	41.11	43.88	65.45	others
CsaV3_1G026650	0.91	3.13	1.46	13.73	5.83	6.19	1.79	3.2	3.34	0.00573597	0.8393	0.0267632	up-down	14.06	8.78	7.16	1.34	4.27	0.86	5.82	7.87	7.31	down
CsaV3_1G027910	82.22	72.47	70.52	136.84	128.65	154.49	51.43	78.52	91	0.00320756	0.951028	0.00774403	up-down	68.84	77.68	94.28	74.72	87.05	66.44	66.43	74.86	97.56	others
CsaV3_1G028330	24.94	11.78	15.77	54.35	38.36	38.65	18.49	23.78	16.5	0.0171435	0.967102	0.00370362	up-down	14.96	11.27	8.87	11.83	28.56	12.27	10.11	11.69	18.53	others
CsaV3_1G028540	30.74	39.33	37.15	94.33	112.79	83.26	32.42	27.31	31.29	4.85e-12	0.645883	1.51e-16	up-down	31.06	27.41	27.88	21.53	29.54	19.06	18.15	17.06	27.93	others
CsaV3_1G028590	11.16	12.66	9.9	30.18	31.52	24.81	6.82	7.41	8.26	1.56e-06	0.0654709	1.87e-15	up-down	40.84	20.3	20.43	14.98	14.58	14.47	8.49	8.8	25.22	others
CsaV3_1G029400	6.4	20.35	6.68	59.28	73.04	67.67	0.79	2.02	6	1.4e-06	0.0834744	9.2e-18	up-down	2.29	10.51	18.88	3.43	16.77	0.35	21.61	47.24	11.32	others
CsaV3_1G029440	0.49	0.94	0.44	4.34	1.65	1.99	0.13	0.16	0.12	0.0138554	0.24837	4.68e-06	up-down	0.45	0.82	0.05	0.8	0.38	0.07	0.11	0.1	0.44	others
CsaV3_1G029620	98.76	69.64	76.48	254.55	193.51	224.09	77.55	96.64	86.81	4.42e-05	0.979381	4.92e-06	up-down	115.1	130.71	120.41	163.08	155.32	142.99	75.8	79.96	88.62	up
CsaV3_1G030390	0	0	0	17.6	4.25	0.43	0.45	0.39	0	0.0033508	NA	0.015359	up-down	3.44	12.7	9.95	0	0.78	1.07	0	1.29	7.88	down
CsaV3_1G030920	14.65	13.49	19.87	43.84	43.54	22.11	13.95	13.58	19.2	0.025461	0.969821	0.00726734	up-down	13.28	13.57	19.27	3.18	4.13	3.3	5.58	7.96	17.95	down
CsaV3_1G031110	0.34	1.42	0.53	4.71	5	2.62	0.09	0.95	1.02	0.00226912	0.990973	0.00291037	up-down	7.26	10.67	17.5	0	0	0	0.09	5.47	21.08	down
CsaV3_1G031130	39.07	45.28	50.81	124.95	117.06	116.36	20.85	31.98	46.31	1.46e-09	0.507368	4.4e-09	up-down	56	61.69	96.74	15.38	19.75	11.81	44.63	76.71	47.14	down
CsaV3_1G031180	3.33	3.25	2	7.4	7.91	5.24	2.47	2.87	3.03	0.0144615	0.976746	0.00147729	up-down	1.72	1.85	2.03	0.37	0.77	0.09	0.34	1.15	4.23	down
CsaV3_1G031420	0.59	0	0	3.11	3	0.9	0.14	0.56	0.27	0.0351899	NA	0.0247627	up-down	0.1	0	0	0.18	0.69	0	0	0.19	0.53	others
CsaV3_1G031430	47.91	44.5	36.69	206.59	209.26	172.28	7.8	25.88	9.6	9.51e-17	0.0181629	2.87e-16	up-down	6.78	6.92	6.87	45.89	97.92	29.44	48.01	70.66	17.77	up
CsaV3_1G031460	18.23	37.24	16.15	59.37	98.09	53.77	12.48	17.89	13.81	0.00491991	0.447533	2.32e-09	up-down	407.7	173.13	157.12	139.14	162.89	69.13	236.75	279.9	171.91	others
CsaV3_1G031560	1.89	2.16	1.73	5.02	6.66	7.75	0.21	0.46	0.48	0.000335776	0.0057824	5.54e-12	up-down	0	0.33	0.82	7.83	11.51	3.49	0.54	1.34	1.27	up
CsaV3_1G031610	16.25	11.26	10.61	40.99	27.08	29.54	7.31	16.55	15.74	0.0032022	0.997323	0.00884212	up-down	16.95	19.97	24.72	9.85	15.42	11.84	7.19	15.25	25.11	others
CsaV3_1G031740	5.87	6.61	6.38	10.78	18.04	11.49	2.71	4.71	7.86	0.0133244	0.884246	0.0133078	up-down	9.53	6.79	6.96	3.08	7.49	2.74	6.65	7.54	10.76	others
CsaV3_1G031760	10.32	10.5	10.25	20.56	18.24	15.16	8.89	10.71	7.4	0.0489587	0.8393	0.0161067	up-down	5.99	6.37	7.07	3.06	6.18	4.69	4.1	3.78	5.88	others
CsaV3_1G031770	15.58	23.19	20.39	34.04	42.69	42.51	14.49	16.3	18.48	0.00323865	0.706515	1.05e-05	up-down	14.01	11.29	10.44	9.74	11.68	12.53	10.48	11.04	13.44	others
CsaV3_1G031820	31.04	64.54	47.24	96.75	139.04	87.83	24.92	32.45	35.42	0.0137249	0.321971	1.85e-08	up-down	383.79	278.77	361.72	377.37	334.98	187.92	317.43	186.44	434.99	others
CsaV3_1G031920	18.32	14.35	13.41	154.57	81.88	61.8	8.3	14.87	21.48	1.51e-08	0.976619	1.87e-08	up-down	30.14	21.12	38.5	35.06	20.85	16.36	18.69	16.89	70.95	others
CsaV3_1G032680	30.39	52.7	33.05	96.01	151.63	161	21.72	22.87	39	6.63e-05	0.686709	2.18e-08	up-down	124.15	102.67	111.17	129.49	153.54	101.42	92.39	101.27	118.67	others
CsaV3_1G032940	17.38	19.33	15.26	39.8	42.36	24.74	11.72	12.71	11.72	0.0443107	0.18103	4.9e-05	up-down	27.53	17.71	16.68	10.69	10.24	14.07	8.19	5.16	26.26	others
CsaV3_1G033060	9.7	14.39	13.03	33.58	37.35	25.92	9.84	6.82	9.94	2.84e-05	0.390145	1.2e-09	up-down	26.97	18.14	26.23	61.5	39.69	37.45	12.99	17.38	29.06	up
CsaV3_1G033120	8.56	9.59	8.38	37.9	51.57	21.33	8.18	7.44	6.65	2.63e-05	0.868754	5.83e-07	up-down	48.84	19.78	60.77	21.07	19.27	7.86	10.11	17.52	105.72	others
CsaV3_1G033250	2.13	1.86	1.22	8.89	6.91	3.81	1.25	2.7	2.87	0.00127951	0.883734	0.0139304	up-down	7.34	6.95	10.48	2.34	3.94	2.18	1.2	3.04	20.96	down
CsaV3_1G033530	23.3	24.97	23.04	67.1	62.85	35.87	9.86	16.95	30.2	0.00592264	0.82438	0.00406667	up-down	39.76	26.34	64.19	8.71	7.52	4.52	7.13	19.96	52.66	down
CsaV3_1G033610	51.04	73.89	66.88	116.48	128.61	132.29	59.57	58.31	89.61	0.00453902	0.9691	0.0275688	up-down	65.26	75.18	88.38	97.03	72.78	68.59	93.16	90.29	86.09	others
CsaV3_1G033660	0.38	0	0	14.35	3.48	2.72	0	1.05	0	0.00376237	NA	0.0115959	up-down	0.78	6.97	6.06	0	0.75	0	0.57	0	3.78	down
CsaV3_1G034300	9.49	11.26	10.11	19.97	21.16	17.13	6.89	7.9	13.06	0.00445449	0.90036	0.0129245	up-down	13.93	13.92	20.9	9.74	12.34	6.56	8.25	11.21	17.1	others
CsaV3_1G034420	58.26	66.3	47.91	109.71	120.35	101.99	53.07	58.79	77.51	0.00596737	0.952334	0.0213938	up-down	22.41	27.21	36.4	4.79	8.34	7.2	20.55	28.99	23.05	down
CsaV3_1G035880	11.38	5.29	5.67	28.86	27.37	22.4	4.87	9.6	9.32	0.000361117	0.992682	1.07e-05	up-down	4.59	3.36	2.09	8.43	15.67	11.86	2.49	5.05	2.39	up
CsaV3_1G036330	12.35	13.04	8.4	36.41	55.31	34.61	10.9	12.98	23.96	1.63e-06	0.732262	0.00254917	up-down	31.24	23.09	40.96	5.29	6.54	2.85	5.11	17.86	47.78	down
CsaV3_1G036340	2.01	1.96	2.82	5.95	11.85	5.42	1.88	1.91	4.54	0.00288039	0.942926	0.0272379	up-down	0.6	1.62	4.38	0.23	2.29	0.7	0.97	2.23	1.38	others
CsaV3_1G036370	10.09	23.46	19.18	24.72	54.04	37.73	8.42	8.68	13.12	0.0473516	0.179088	7.03e-07	up-down	3.05	2.5	2.42	3.27	5.66	1.64	3.36	4.88	7.86	others
CsaV3_1G036420	33.06	29.75	27.57	45.81	61.14	55.27	17.13	26.7	24.13	0.0403999	0.377512	0.000242155	up-down	5.8	4.37	2.96	7.66	13.1	9.73	4.86	1.84	3.11	up
CsaV3_1G036780	1.02	0.17	0.16	31.54	8.58	3.93	0.17	0.55	1.14	8.69e-06	NA	1.35e-06	up-down	11.2	45.48	20.03	3.1	4.94	0.46	0	3.19	18.04	down
CsaV3_1G037230	42.7	47.27	50.46	82.38	81.01	82.9	46.12	56.7	53.38	0.00315427	0.903653	0.0334575	up-down	13.35	11.72	11	8.51	13.34	11.51	7.72	9.27	12.27	others
CsaV3_1G038350	0.18	0.43	0.2	3.41	4.04	0.78	0.21	0.51	0	0.00370581	NA	0.00481224	up-down	2.07	0.57	3.1	0.59	0	0	0.16	0.6	3.33	down
CsaV3_1G038380	0.83	0.55	0.17	38.47	34.51	10.19	1.06	0.58	0.43	5.02e-16	0.955702	5.17e-19	up-down	14.82	6.99	17.3	0	0	0	1	4.12	25.7	down
CsaV3_1G038390	0.95	1.36	0.45	95.07	48.22	20.39	1.11	1.36	0.72	1.76e-19	0.971477	2.66e-23	up-down	13.48	29.22	24.91	0.54	0.36	0.2	0.52	3.51	31.67	down
CsaV3_1G038400	0.71	0.17	0.47	115.59	142.13	29.39	0.65	1.47	0.94	1.36e-22	NA	5.03e-26	up-down	12	7.43	9.19	1.82	1.54	3.17	0.34	1.66	22.41	down
CsaV3_1G038650	1.45	8.04	10.99	26.05	38.36	19.16	8.63	5.17	9.11	0.018011	0.979982	0.000772346	up-down	29.98	28.36	30.34	11.6	17.57	19.81	35.4	36.83	44.3	others
CsaV3_1G038820	202.25	284.78	411.45	538.41	655.8	774.44	77.55	199.12	305.09	0.0286289	0.610438	0.000597222	up-down	106.32	248.72	380.44	359.83	430.84	280.1	597.09	564.86	324.22	others
CsaV3_1G038850	117.33	97.66	78.5	398.89	185.87	153.95	94.46	101	92.38	0.0289517	0.972173	0.00609257	up-down	165.23	178.5	148.79	76.24	103.67	59.34	99.51	147.99	214.58	down
CsaV3_1G038880	3.51	5.39	3.14	38.18	37.07	17.72	1.77	3.05	5.48	2.73e-09	0.942926	1.04e-09	up-down	33.93	29.55	86.32	6.46	4.27	0.3	2.45	15.43	77.19	down
CsaV3_1G039130	23.57	41.22	19.31	101.75	83.67	74.77	58.36	40.15	32.58	0.000467888	0.579589	0.0451672	up-down	41	42.75	68.03	51.43	54.06	69.58	25.26	33.46	75.38	others
CsaV3_1G039310	31.02	42.43	30.38	87.86	83.44	52.9	32.17	23.89	30.19	0.00145523	0.677623	4.7e-06	up-down	43.04	40.3	47.31	10.64	21.45	18.61	17.17	22.22	38.65	down
CsaV3_1G039630	65.69	60.32	59.84	154.72	114.4	153.01	56.88	88.14	83.76	0.000527014	0.784191	0.0437951	up-down	44.33	43.5	54.51	54.99	52.33	49.13	36.75	48.18	65.83	others
CsaV3_1G039640	1.73	9.89	4.83	17.33	26.57	17.64	2.26	5.51	5.95	0.0241047	0.958475	0.000884996	up-down	10.48	12.89	22.59	9.62	12.97	7.42	6.96	8.51	20.42	others
CsaV3_1G039720	33.03	24.48	37.03	79.42	74.77	57.45	31.29	36.62	24.68	0.0205393	0.986898	0.0166288	up-down	72.73	86.25	158.73	190.83	144.09	37.7	89.06	224.45	93.22	others
CsaV3_1G039810	17.38	20.77	22.35	59.88	48.74	39.7	27.2	18.13	19.6	0.00110856	0.976327	0.00662123	up-down	20.37	23.28	29.88	17.29	16.84	12.89	12.21	19.71	42.48	others
CsaV3_1G039820	5.88	6.66	6.96	61.38	38.92	20.96	5.02	5.57	6.28	1.07e-07	0.87753	4.51e-10	up-down	16.19	22.65	32.24	4.34	8	3.01	1.88	8.44	25.92	down
CsaV3_1G039840	4.08	5.29	5.86	105.49	52.82	31.65	3.15	3.63	4.44	5.6e-14	0.495662	7.42e-21	up-down	23.29	28.03	36.24	6.95	8.45	5.7	2.65	9	33.85	down
CsaV3_1G040000	3.77	12.75	1.5	46	68.42	28.32	0.56	1.27	1.77	0.000155198	0.0726933	6.01e-26	up-down	50.34	65.61	59.06	121.11	48.64	1.78	16.08	52.1	39.6	others
CsaV3_1G040530	8.99	3.54	5.74	105.44	45.97	31.15	9.25	9.42	5.07	2.41e-07	0.907654	1.49e-07	up-down	10.76	10.62	19.49	7.28	5.45	0.37	3.88	8.5	36.04	others
CsaV3_1G040580	1.77	0.98	0.63	43.17	26.48	9.31	0.31	0.46	3.57	6.72e-12	0.965398	0.00356501	up-down	31.37	17.43	38.7	0	0.13	0	0.19	4.4	36.1	down
CsaV3_1G040750	9.59	13.32	14.05	66.08	35.09	24.57	16.77	11.89	16.25	0.000644894	0.815958	0.00239807	up-down	13.58	16.42	13.49	7.3	10.08	9.97	14.32	12.61	17.22	others
CsaV3_1G040780	48.56	63.22	44.24	118.1	107.25	80	39.5	39.41	39.15	0.0155756	0.436188	1.32e-06	up-down	167.32	141.33	135.68	221.06	215.42	148.92	113.78	77.23	197.29	others
CsaV3_1G040830	0.06	0	0.07	8.32	5.32	4.96	0.15	0	0	3.4e-08	NA	1.83e-08	up-down	0.13	0	0.06	0	0.43	0	0	0	0	others
CsaV3_1G041350	14.28	13.93	13.73	28.96	22.92	27.29	12.9	17.23	13.35	0.00961767	0.991927	0.0363521	up-down	7.69	9.03	7.15	6.84	8.67	8.69	6.38	6.23	9.2	others
CsaV3_1G042140	12.87	12.87	12.26	38.95	28.25	24.33	13.73	12.36	14.5	0.00161707	0.976179	0.00265773	up-down	13.96	12.94	14.63	8.38	9.85	13.12	10.77	14.39	23.86	others
CsaV3_1G042170	108.91	53.56	43.94	372	132.98	136.99	77.64	101.27	65.08	0.0280217	0.940884	0.0169151	up-down	282.02	323.62	329.06	262.97	299.87	244.23	146.89	147.98	344.44	others
CsaV3_1G042300	38.22	68.26	58.5	106.24	140.26	124.61	61.67	50.96	73.65	0.00271652	0.932326	0.00324953	up-down	31.38	42.83	49.31	40.22	33.14	40.69	50.49	41.74	60.36	others
CsaV3_1G042760	26.03	21.51	23.9	65.65	61.28	48.67	13.48	22.9	16.79	4.01e-05	0.538526	6.4e-07	up-down	16.58	19.08	23.18	23.14	34.72	12.95	16.22	21.94	18.44	others
CsaV3_1G042770	12.76	21.06	17.45	27.85	51.02	30.35	17.63	11.22	15.35	0.0306278	0.853836	0.00216073	up-down	11.82	16.17	15.57	14.71	20.57	17.37	23.68	23.28	21.23	others
CsaV3_1G042880	22.99	14.2	11.08	148.54	69.75	56.36	5.26	20.2	17.56	1.16e-05	0.951543	4.73e-06	up-down	100.47	38.81	100.71	22.52	9.68	6.47	1.68	4.46	188.41	down
CsaV3_1G042920	19.3	20.25	21.39	44.67	46.46	29.18	18.19	21.93	21.76	0.0173966	0.994817	0.0186575	up-down	39.49	43.41	51.64	25.98	19.93	24.08	23.68	23.27	57.2	down
CsaV3_1G043320	0	0	0	4.45	2.94	0.24	0	0	0	0.0120884	NA	0.00741906	up-down	1.53	1.05	3.14	0.81	0.74	0	0	0.14	0.99	others
CsaV3_1G043490	10.64	12.54	13.34	25.8	24.04	23.79	18.1	12.91	16.58	0.00442036	0.931748	0.0359153	up-down	9.88	10.57	11.78	8.98	9.14	15.41	6.45	14.98	19.75	others
CsaV3_1G046270	66.88	36.42	36.11	366.94	171.06	227.79	61.63	75.94	42.47	5.08e-07	0.840292	1.18e-06	up-down	184.84	203.72	171.61	383.14	334.27	293.88	88.75	107.54	161.69	up
CsaV3_1G046320	48.84	39.25	29.16	250.24	160.95	87.35	31.09	35.74	39.92	7.89e-05	0.908991	1.97e-07	up-down	166.31	152.48	320.86	33.81	36.04	36.84	25.9	68.52	171.75	down
CsaV3_1G046490	4.5	6.93	6.53	11.81	16.8	12.97	6.24	4.17	7.88	0.000623103	0.993124	0.000912487	up-down	10.13	9.76	9.38	14.07	14.3	14.83	6.2	4.31	12.96	up
CsaV3_1G046510	30.88	34.13	31.54	54.52	57.94	61.75	21.48	28.12	32.49	0.00611911	0.740532	0.0014484	up-down	93.46	67.44	56.42	95.74	99.83	121.37	65.88	47.02	60.98	up
CsaV3_1G046530	5.25	9.27	7	16.78	24.25	16.67	6.05	4.51	5.88	0.00265715	0.775595	1.41e-05	up-down	19.29	14.21	13.26	22.24	29.54	13.02	7.71	10.85	10.91	others
CsaV3_1G046660	4.6	3.94	3.9	7.08	12.59	7.44	2.56	5.01	2.21	0.023686	0.821994	0.00621347	up-down	20.94	7.76	6.58	10.83	10.75	12.7	5.62	6.03	6.42	others
CsaV3_2G001140	14.85	23.03	27.36	44.9	57.13	38.63	17.01	13.55	21.96	0.013872	0.768577	5.51e-05	up-down	27.75	29.19	36.88	7.77	10.07	12.71	17.5	21.8	41.19	down
CsaV3_2G001230	20.54	25.49	24.43	43.43	44.09	33.5	13.62	18.99	21.52	0.0357456	0.476092	0.000719035	up-down	46.58	32.24	35.65	26.08	33.06	20.77	17.02	16.96	55.72	others
CsaV3_2G001350	11.65	12.98	12.91	42.11	38.06	25.88	17.29	16.8	15.97	6.01e-05	0.569821	0.00810223	up-down	18.12	19.44	21.55	3.42	2.04	2.19	7.65	14.39	28.55	down
CsaV3_2G001360	4.68	6.11	4.45	29.34	37.5	15.9	2.68	4.49	6.26	9.26e-09	0.914436	4.49e-09	up-down	12.4	10.17	14.26	0.55	0.72	1	1.95	6.37	14.79	down
CsaV3_2G001440	0.06	0.07	0	1.17	0.99	0.13	0	0.11	0	0.0388654	NA	0.0363108	up-down	0.12	0.18	0.54	0	0	0	0	0.27	0.16	others
CsaV3_2G001450	0.12	0.08	0	2.23	1.1	0.4	0	0.06	0	0.00790586	NA	0.0016044	up-down	0	0.09	0.11	0	0	0	0	0	0	others
CsaV3_2G001640	38.14	44.39	45.35	101.61	99.37	85.35	46.53	35.74	55.33	0.000100954	0.970706	0.00349846	up-down	39.25	35.17	42.27	34	37.2	35.38	19.49	20.29	48.08	others
CsaV3_2G002090	38.1	27.84	27.08	139.02	72.92	81.39	24.96	36.29	30.74	0.000339435	0.979982	3.54e-05	up-down	34.21	27.97	38.77	29.92	26.42	23.5	23.2	23.96	38.1	others
CsaV3_2G002170	54.83	28.31	28.82	137.99	87.92	63.87	22.91	46.26	26.29	0.029522	0.898262	0.00125928	up-down	82.46	69.32	72.32	113.83	111.38	126.22	44.29	52.34	104.59	up
CsaV3_2G002440	2.22	2.82	1.6	7.62	8.36	3.96	1.64	2.01	2.27	0.0231802	0.956427	0.00618532	up-down	8.71	10.07	6.73	3.38	2.62	2.64	0.8	2.15	12.49	down
CsaV3_2G002610	31.06	25.15	25.87	130.94	79.3	67.71	26.13	21.21	22.77	0.000171902	0.884246	7.84e-06	up-down	29.7	32	60.58	24.18	20.75	14.83	18.51	28.02	52.29	others
CsaV3_2G002620	14.07	6.27	12.17	64.6	76.72	27.49	8.95	0	0	0.0348424	NA	0.00547366	up-down	26.05	27.42	36.55	5.77	12.19	3.35	9.91	19.09	39.94	down
CsaV3_2G003020	0.76	0.88	0.26	53.63	17.37	7.36	0.09	1.01	1.29	5.22e-11	0.96846	0.000226833	up-down	2.11	11.24	5.35	1.35	1.06	0.89	0.83	1.61	8.44	down
CsaV3_2G003380	18.06	23.66	17.42	149.22	175.73	105.33	16.29	17.04	15.82	4.16e-22	0.701878	8.76e-31	up-down	80.21	65.92	86.5	50.77	64.36	29.13	10.64	22.82	73.11	others
CsaV3_2G003400	22.74	31.81	23.01	92.25	123.09	130.29	43.19	26.42	28.86	4.33e-10	0.8328	2.19e-06	up-down	49.02	59.37	46.02	106.74	55.42	43.97	33.74	40.93	56.39	others
CsaV3_2G003470	68.63	80.81	74.28	159.73	183.06	154.77	74.6	58.52	68.5	2.76e-05	0.860866	8.65e-06	up-down	99.28	80.41	90.62	181.34	213.19	114.36	95.42	100.92	124.59	up
CsaV3_2G003860	0	0	0.62	26.56	35.27	10.94	1.26	1.13	3.77	2.31e-05	NA	0.000107178	up-down	33.03	90.99	94.82	0	0	0	0	4.23	97.57	down
CsaV3_2G003870	2.07	1.14	0	22.28	5.7	4.2	1.09	0.96	0	0.0263623	NA	0.00612665	up-down	4.62	18.53	7.08	0.78	2.33	1.45	0	0.8	6.57	down
CsaV3_2G003910	0.86	0.86	0.8	27.98	26.81	13.8	0.44	1.18	2.32	2.21e-26	0.846668	2.09e-15	up-down	6.55	3.65	9.72	0.49	0	0.07	0.11	2.22	8.86	down
CsaV3_2G003950	29.02	31.65	29.37	50.58	79.63	45.47	18.2	19.42	27.95	0.0214655	0.258352	4.93e-05	up-down	18.23	23.91	29.53	21.12	42.8	13.7	15.4	21.19	26.81	others
CsaV3_2G004110	15.49	15.61	8.14	98.15	109.72	42.83	7.39	8.83	5.12	1.11e-07	0.210309	1.41e-17	up-down	25.52	69.21	51.66	30.08	44.25	29.99	16.19	40.36	63.94	others
CsaV3_2G004400	19.39	27.89	23.49	57.48	78.81	44.64	8.55	8.8	13.32	0.000176491	4.74e-05	3.92e-16	up-down	10.64	5.67	8.44	1.7	2.43	1.43	1.1	3.28	13.25	down
CsaV3_2G004460	8.65	10.72	9.39	17.83	22.27	15.33	8.95	8.83	9.29	0.00624376	0.903332	0.000891275	up-down	6.6	6.57	4.95	5.2	7.79	6.1	3.51	5.39	6.6	others
CsaV3_2G004480	20.99	18.7	21.05	48.33	36.46	37.9	20.08	21.04	21.12	0.00449858	0.998717	0.00291479	up-down	18.11	15.89	12.56	19.27	22.49	17.16	17.25	14.99	14.47	others
CsaV3_2G004540	25.51	34.79	23.9	59.96	74.63	43.94	22.47	20.88	25.47	0.00841793	0.614693	1.75e-05	up-down	57.13	55.47	55.64	33.9	51.09	37.48	29.6	24.07	76.23	others
CsaV3_2G004930	59.89	77.59	65.59	106.91	112.7	117.38	53.82	60.37	67.72	0.0332764	0.816895	0.0036486	up-down	60.62	55.36	63.53	58.42	54.11	38.75	55.79	51.46	61.4	others
CsaV3_2G005040	8.38	6.36	4.16	29.17	35.84	11.85	2.83	5.55	3.95	0.0026758	0.717187	7.14e-06	up-down	4.24	2.94	8.17	0.23	0	0	0	4.09	9.28	down
CsaV3_2G005050	0.03	0.13	0	2.41	1.26	0.62	0	0	0.12	2.63e-05	NA	8.66e-06	up-down	0.72	2.13	1.15	0	0.06	0	0	0	1.44	down
CsaV3_2G005060	0.03	0	0.09	1.1	1.04	0.39	0	0	0.03	0.000472909	NA	9.73e-05	up-down	0.43	0.09	0.41	0	0	0	0.15	0.17	1.62	down
CsaV3_2G005190	3.84	2.6	2.02	16.22	9.87	7.28	2.9	3.86	3.49	0.00267403	0.943131	0.00399937	up-down	12.9	16.46	22.61	12.89	12.81	10.02	4.91	4.56	17.82	others
CsaV3_2G005270	6.27	8.94	9.09	19.09	19.97	12.77	6.76	6.58	8.18	0.00628295	0.8384	0.000149695	up-down	3.14	5.35	4.95	0.53	1.37	2.55	3.18	6.53	4.82	down
CsaV3_2G006460	6.79	2.71	4.57	20.19	26.94	26.98	8.35	9.24	12.61	4.28e-07	0.123977	0.00016434	up-down	2.56	1.48	2.03	2.2	3.31	30.53	8.19	9.84	2.14	others
CsaV3_2G006560	116.13	96.64	80.36	255.44	205.72	175.73	72.25	105.31	118.42	0.00638089	0.990973	0.00395763	up-down	285.52	193.39	177.63	225.59	305.09	178.06	175.72	234.6	370.22	others
CsaV3_2G006570	1.5	9.68	3.89	13.13	38.31	11.3	2.31	3.65	2.92	0.046753	0.823601	0.000173928	up-down	12.96	8.85	12.21	5.59	12.63	6.02	11.99	8.76	7.28	others
CsaV3_2G006720	18.05	11.75	13.33	103.75	69.29	72.93	14.64	13	14.69	9.01e-12	0.975131	2.97e-17	up-down	22.18	21.85	15.64	38.31	43.94	27.58	5.58	7.92	13.97	up
CsaV3_2G006890	16.79	24.29	24.89	153.82	105	43.15	17.01	15.28	22.37	2.76e-05	0.7736	2.38e-08	up-down	40.67	27.16	51.6	7.12	10.13	12.09	9.42	16.45	57.77	down
CsaV3_2G007070	9.52	7.57	9.68	16.09	14.01	17.39	6.88	8.16	11.65	0.0249646	0.968851	0.0338133	up-down	6.89	5.63	5.12	3.8	6.28	4.19	3.83	5.3	8.23	others
CsaV3_2G007530	69.5	56.82	60.11	134.36	101.42	102.72	51.43	65.37	66.9	0.0443107	0.970261	0.0185878	up-down	48.93	45.46	49.12	34.85	47.21	38.34	35.47	40.59	51.82	others
CsaV3_2G007540	33.98	27.13	24.74	80.62	67.42	42.51	26.86	33.15	28.34	0.0282305	0.998717	0.0131315	up-down	42.16	38.3	44.29	57.86	53.12	50.96	23.67	22.76	48.15	up
CsaV3_2G007560	83.77	69.74	78	210.66	153.75	139	64.04	68.91	80.44	0.00367948	0.868754	0.000138433	up-down	122.72	103.91	108.49	88.53	131.77	88.59	65	63.51	96.21	others
CsaV3_2G008010	129.32	124.71	113.81	223.98	200.27	200.68	132.97	129.76	121.64	0.00676442	0.998717	0.0185464	up-down	101.4	111.01	115.28	90.82	110.86	91.85	68.98	84.9	105.16	others
CsaV3_2G008700	48.51	44	43.68	137.74	123.13	95.9	33.73	36.35	36.63	6.09e-06	0.342987	5.23e-11	up-down	32.06	35.57	35.9	21.95	23.88	25.69	18.33	24.7	35.06	others
CsaV3_2G008760	13.29	25.73	20.24	44.55	83.19	39.23	15.93	13.83	16.05	0.00138559	0.538799	1.31e-07	up-down	19.51	18.67	16.8	8.15	9.74	8.32	6.61	5.34	17.84	down
CsaV3_2G009220	10.48	21.73	15.38	87.25	65.39	23.85	11.1	10.65	10.73	0.00233612	0.417152	3.6e-07	up-down	168.92	71.65	81.05	30.26	31.49	35.26	50.75	23.97	82.38	down
CsaV3_2G009630	10.26	8.66	7.13	170.67	86.74	55.55	4.32	7.33	6.19	3.65e-15	0.406244	1.39e-22	up-down	19.48	21.95	23.89	3.02	3.62	1.86	1.72	3.33	19.47	down
CsaV3_2G009640	0.29	0.35	0.28	1.82	1.76	0.8	0.55	0.29	0.3	0.000730422	0.943929	0.00474417	up-down	1.38	1.77	2.29	0	0	0	0	0.14	2.05	down
CsaV3_2G009980	42.08	37.44	38.1	107.34	72.37	64.28	34.3	37.03	41.51	0.0178046	0.942926	0.00379313	up-down	85.01	66.72	79.47	56.03	59.54	51.42	45.73	40.94	77.89	others
CsaV3_2G010400	3.62	2.78	1.91	85.94	71.38	30.32	1.68	4.83	4.56	3.99e-20	0.924927	4.9e-17	up-down	100.07	32.57	112.01	3.8	1.73	1.09	1.86	7.22	202.98	down
CsaV3_2G010410	0.13	0.08	0.07	19.33	14.04	6.11	0.07	0.06	0.14	1.67e-13	NA	1.63e-14	up-down	11.04	0.91	2.41	0.33	0	0	0	0.11	2.12	down
CsaV3_2G010880	16.78	14.71	11.59	45.27	36.91	23.83	18.15	19.05	15.48	0.00903432	0.845032	0.0289798	up-down	16.49	18.78	23.25	3.33	5.44	6.36	6.25	11.16	26.18	down
CsaV3_2G011110	10.07	8.34	7.2	22.16	26.88	19.63	9.26	8.68	9.44	0.000178215	0.980046	4.11e-05	up-down	6.85	7.08	8.93	2.3	3.38	7.01	8.09	11.11	3.44	others
CsaV3_2G011320	1.08	4.14	3.91	18.59	18.23	15.22	2.82	6.5	7.3	0.0025127	0.827792	0.0420419	up-down	18.51	22.88	21.34	9.09	17.38	9.14	12.44	20.7	7.24	others
CsaV3_2G011400	0.22	0	0.24	18.2	4.4	2.76	0.24	0	0	0.000351263	NA	6.79e-05	up-down	5.92	17.22	17.33	0	0	0.39	0	0.67	16.15	down
CsaV3_2G011480	56.05	30	33.97	185.95	116.03	123.82	37.15	62.2	40.14	0.000107855	0.942926	6.3e-05	up-down	30.78	31.34	26.38	46.44	48.98	44.54	20.23	24.25	25.89	up
CsaV3_2G011510	1.52	0.85	1.2	4.86	3.57	3.23	0.81	1.34	2.06	0.0022854	0.96261	0.01198	up-down	5.75	9.77	9.54	3.28	3.52	1.67	1.69	4.23	36.51	down
CsaV3_2G011530	1.42	2.13	0.93	13.25	8.55	3.71	1.63	1.68	2.38	0.00142172	0.942926	0.00238529	up-down	17.3	10.32	14.44	0	1.35	0	1.24	1.04	26.6	down
CsaV3_2G011550	543.26	1090.77	999.44	2314.22	2165.02	2251.01	970.05	579.25	1122.73	0.0357358	0.990973	0.0114703	up-down	1735.74	1435.73	1488.92	2000.72	2125.26	1648.07	1249.38	1311.59	1619.86	others
CsaV3_2G011650	1.53	1.58	1.21	6.4	11.85	7.53	1.09	1.58	2.36	2.72e-10	0.994605	3.5e-07	up-down	1.4	3.18	5.54	0.57	3.38	1.69	1.19	1.34	2.74	others
CsaV3_2G012160	47.29	23.21	26.36	260.1	70.85	64.66	17.06	43.65	37.83	0.00841793	0.994401	0.00272383	up-down	34.9	57.42	79.26	14.86	15.89	6.19	15.39	37.96	106.61	down
CsaV3_2G012300	72.63	104.26	106.48	253.19	186.66	200.99	78.64	100.76	65.54	0.000663835	0.852668	9.97e-05	up-down	26.01	30.73	34.62	55.11	34.33	56.04	21.02	27.57	48.53	up
CsaV3_2G012320	12.28	18.63	17.01	30.03	38.91	39.52	10.79	16.26	18.79	0.00233401	0.962115	0.000438592	up-down	51.09	42.19	59.25	83.54	56.91	57.19	67.88	42.85	71.48	others
CsaV3_2G012630	21.74	22.6	20.86	290.81	141.44	61.92	22.9	25.58	31.15	1.31e-06	0.852668	1.81e-06	up-down	190.95	140.49	246.98	51.75	69.82	42.57	47.96	62.79	259.48	down
CsaV3_2G012780	0.7	1.84	0.63	8.36	10.67	1.66	0.32	0.26	1.71	0.00995683	0.942926	0.00252042	up-down	75.45	104.49	85.81	6.43	1.31	3.15	10.21	22.4	172.55	down
CsaV3_2G012810	243.41	213.43	160.75	6492.66	3886.6	3149.15	243.18	372.41	370.61	1.5e-33	0.582704	3.22e-29	up-down	1946.89	2438.25	3999.35	477.47	518.46	231.52	585.65	1479.47	5480.45	down
CsaV3_2G012870	1.41	2.86	1.56	43.75	32.03	14.4	1.36	2.09	3.11	5.73e-10	0.980046	2.05e-10	up-down	15.78	16.11	54.41	1.01	0.27	0.94	2.78	8.41	16.25	down
CsaV3_2G012890	1.27	1.02	0.6	12.22	5.81	6.31	0.85	1.9	0.83	8.48e-06	0.957046	5.49e-05	up-down	2.62	5.09	7.53	0	2.25	0.37	0.18	0.77	4.5	down
CsaV3_2G013350	32.65	48.26	22.69	108.96	148.32	112.67	31.67	16.21	38.22	3.38e-05	0.898262	6.24e-07	up-down	32.96	34.1	32.68	62.67	47.87	45.42	10.16	29.62	58.37	up
CsaV3_2G014120	9.67	12.85	10.91	39.84	34.63	19.3	10.45	8.37	12.5	0.00165077	0.945135	0.000330059	up-down	16.33	12.57	21.02	0.66	2.15	0.62	2.37	5.43	12.72	down
CsaV3_2G014280	33.96	34.75	33.45	68.63	63.36	53.79	36.16	33.54	41.19	0.0122898	0.951028	0.0470429	up-down	55.23	52.11	52.59	28.42	36.69	32.44	41.3	42.43	64.18	others
CsaV3_2G014330	8.75	9.51	10.16	57.16	50.82	27.04	7.07	8.09	11.9	4.01e-09	0.947494	1.62e-09	up-down	25.49	21.46	35.4	1.93	1.74	1.53	2.98	8.18	38.52	down
CsaV3_2G014540	13.93	16.82	10.27	64.64	51.34	43.11	11.82	21.9	20.55	6.34e-08	0.771214	0.000101835	up-down	24.7	34.31	52.88	12.1	16.84	8.71	10.38	42.05	34.45	down
CsaV3_2G014760	31.57	48.69	44.97	107.41	127.48	84.45	52.18	39.48	53.89	0.000774498	0.909347	0.00388738	up-down	37.14	68.48	72.29	16.21	12.85	10.4	19.33	35.28	45.62	down
CsaV3_2G015050	23.3	25.31	22.93	43.72	46.65	34.36	22.83	24.2	25.42	0.0327493	0.992257	0.0331403	up-down	37.28	26.95	30.43	13.3	16.35	23.06	19.95	23.16	28.98	others
CsaV3_2G015130	424.47	237.2	243.07	931.52	565.65	604.67	154.18	241.98	245.75	0.0300648	0.538937	3.28e-06	up-down	595.87	484.32	521.86	904.78	1054.41	583.8	401.26	356.19	548.53	up
CsaV3_2G016680	65.54	143.71	140.18	234.06	360.86	239.5	74.41	53.21	99.02	0.0198133	0.484279	3.13e-07	up-down	88.28	125.94	208.33	49.71	58.86	28.36	103.12	122.6	407.25	down
CsaV3_2G017310	11.41	10.18	4.84	28.87	21.5	17.1	3.73	7.1	5.02	0.030531	0.507952	2.59e-06	up-down	1.49	2.66	4.58	9.37	3.1	1.64	1.62	3.46	4.72	others
CsaV3_2G017330	5.58	4.53	5.38	14.6	18.17	14.07	2.56	4.5	4.26	2.46e-05	0.702891	6.31e-07	up-down	2.73	9.42	7.31	3.18	4.35	5.87	11.89	21.26	3.84	others
CsaV3_2G017720	26.6	29.99	16.31	199.16	122.52	56.11	4.91	16.55	21.36	5.68e-05	0.572336	1.47e-07	up-down	104.01	70.67	153.9	1.96	1.06	1.46	7.89	41.7	186.61	down
CsaV3_2G017820	97.55	97.71	99.8	229.2	194.16	221.27	77.87	109.9	125.99	2.73e-05	0.978571	0.0040371	up-down	96.29	109.45	113.75	132.75	120.03	105.71	99.82	97.63	107.3	others
CsaV3_2G017840	1.33	1.48	0.69	4.25	6.48	5.17	0.64	0.57	1.3	0.000120449	0.858242	2.03e-06	up-down	0.18	0	0.16	0	0.7	0.16	0	0.33	0.08	others
CsaV3_2G019460	364.15	613.93	480.62	1234.95	1309.64	1027.52	210.89	295.41	772.9	0.0214491	0.932736	0.0149284	up-down	162.81	115.9	335.35	146.91	103.77	22.92	52.54	210.83	304.81	others
CsaV3_2G019580	68.44	68.22	54.81	342.67	214.26	267.48	92.03	87.86	75.97	1.18e-10	0.524694	1.92e-07	up-down	79.55	83.91	75.5	158.83	115.78	127.03	70.06	95.01	68.59	up
CsaV3_2G019740	45.59	82.31	50.68	241.3	180.96	162.58	34.36	54.64	80.09	1.12e-05	0.968635	7.82e-06	up-down	156.08	133.37	249.97	20.78	22.35	12.2	46.72	91.83	112.77	down
CsaV3_2G021020	47.44	24.84	30.85	127.97	72.44	63.23	28.33	42.64	26.68	0.0232151	0.965174	0.0022839	up-down	37.07	41.34	37.02	41.62	52.81	35.77	18.74	18.38	31.49	others
CsaV3_2G021090	3.91	5.36	4.29	29.77	21.2	12.72	3.06	4.24	5.12	7.25e-07	0.942926	5.95e-08	up-down	6.42	6.31	13.2	0.28	3.16	1.38	5.41	5.79	10.5	down
CsaV3_2G022180	8.78	11.28	10.78	22	27.44	37.12	2.67	13.88	13.46	0.00152027	0.938987	0.0155374	up-down	5.89	10.86	20.63	4.78	4.33	6.73	16.61	20.45	20.5	others
CsaV3_2G024290	17.59	18.68	11.61	78.42	44.43	47.67	24.87	25.21	19.43	5.03e-05	0.53824	0.00303838	up-down	23.09	18.29	19.29	43.95	55.2	61.96	19.04	13.85	31.82	up
CsaV3_2G024670	17.85	12.79	15.74	42.32	41.3	24.99	9.05	20.6	13.3	0.00642612	0.951257	0.00790747	up-down	0	0	0.03	0	0	0	0	0	0	others
CsaV3_2G024820	9.05	16.56	17.54	36.42	29.96	24.81	8.39	6.34	9.46	0.0281933	0.127429	5.51e-09	up-down	32.94	22.49	36.82	13.85	16.48	18.92	9.36	17.68	37.66	others
CsaV3_2G025200	0	0.1	0.09	0.6	2.17	0.6	0	0.22	0.09	0.0207531	NA	0.0387732	up-down	0.52	0.51	0.33	0	0.22	1.18	0	0.07	0.39	others
CsaV3_2G025490	39.37	124.02	152.9	365.83	773.9	336.77	40.5	31.12	41.85	0.000332912	0.0146292	1.06e-25	up-down	76.91	59.57	48.91	63.79	47.22	45.87	45.98	47.41	42.21	others
CsaV3_2G025500	48.8	23.71	84.64	466.68	364.94	330.89	31.58	20.95	16.53	4.84e-08	0.50992	1.03e-18	up-down	46.13	34.54	31.84	21.64	16.32	26.45	27.21	32.09	27.31	others
CsaV3_2G025510	131.67	141.48	306.43	1748.27	1159.86	1115.75	42.58	58.37	50.63	2.05e-10	4.58e-06	1.84e-63	up-down	27.57	17.14	15.31	9.17	12.88	10.38	13.97	11.77	16.34	others
CsaV3_2G025670	8.87	6.56	6.95	57.15	36.09	26.09	4.7	7.65	8.04	4.88e-08	0.937494	1.17e-09	up-down	36.41	36.25	43.4	16.22	22.59	14.46	6.23	13.76	49.35	down
CsaV3_2G025820	8.87	13.38	11.76	19.71	48.38	31.28	11.58	9.79	12.76	0.00319292	0.991953	0.00107786	up-down	8.16	12.14	12.11	4.11	4.91	8.95	15.52	25.66	24.58	others
CsaV3_2G025870	73.13	91.18	116.19	191.37	208.86	443.88	56.36	92.69	152.83	0.00235912	0.98136	0.00804531	up-down	64.82	97.4	73.58	6.66	14.16	12.53	53.9	80.25	22.46	down
CsaV3_2G026180	28.09	49.53	41.72	92.39	92.99	128.8	18.42	28.17	26.22	0.000604399	0.210193	6.15e-10	up-down	71.44	63.34	91.9	702.89	284.81	238.02	149.3	104.46	92.15	up
CsaV3_2G026200	56.81	56.98	64.91	157.43	165.51	97.27	61.04	48.79	61.64	0.00145686	0.944209	0.000344607	up-down	158.32	246.32	281.64	120.51	100.96	122.2	72.87	104.87	202.05	down
CsaV3_2G026540	7.32	9.23	8.38	19.68	21.31	16.56	8.58	8.57	10.51	0.00134729	0.990973	0.00277794	up-down	13.37	11.48	10.42	12.76	22.26	10.53	12.32	8.19	14.8	others
CsaV3_2G028170	0.53	0.63	0.15	9.05	13.57	8.56	0	0.12	1.18	7.76e-10	NA	3.03e-08	up-down	4.26	0.59	0.2	0	0.11	0	0.11	0.1	0.28	down
CsaV3_2G028250	0.12	1.62	0.53	3.29	7.78	2.46	0.4	0.33	0.91	0.0123625	0.942926	3.53e-05	up-down	8.02	6.59	10.21	0.83	1.35	1.32	1.43	3.2	2.89	down
CsaV3_2G028310	0	1.39	0	24	26.5	14.47	0	5.15	4.08	0.00173423	NA	0.0245612	up-down	5.03	4.99	7.15	3.15	1.99	1.57	0.29	0.27	5.77	others
CsaV3_2G028410	0	0.34	0	4.52	3.28	4.64	0	0	0.16	0.000287201	NA	7.79e-05	up-down	1.27	1.86	0.21	0	0	0	0	0.21	0.6	down
CsaV3_2G028550	20.11	22.47	22.99	51.44	45.8	45.63	20.88	23.87	23.19	6.31e-05	0.990973	0.000559254	up-down	9.86	13.31	10.47	3.14	6.08	11.44	12.49	17.17	5.62	others
CsaV3_2G028650	50.48	83.6	90.18	131.71	229.18	153.94	41.25	36.91	60.67	0.00999975	0.195079	6.72e-08	up-down	74.3	96.87	104.19	127.3	146.75	123.81	65.43	88.5	98.09	up
CsaV3_2G028900	84.32	41.26	42.02	449.05	187.84	299.64	65.66	71.07	56.39	3.4e-06	0.944209	9.05e-09	up-down	104.5	120.75	119.03	143.67	153.56	126.53	57.39	87.08	113.67	up
CsaV3_2G028910	5.7	8.69	9.3	65.48	44.7	24.26	19.42	12.46	11.64	1.71e-06	0.30179	0.00287515	up-down	25.15	12.16	25.68	9.38	4.59	3.85	5.44	12.64	34.9	down
CsaV3_2G029040	39.72	27.49	28.18	123.66	96.15	97.1	29.63	33.01	38.89	1.3e-06	0.984601	8.51e-09	up-down	54.6	53.42	38.96	62.78	79.32	69.15	25.63	32.15	55.64	up
CsaV3_2G029050	51.21	38.68	43.56	103.42	69.08	96.14	34.42	48.48	53.89	0.026904	0.996919	0.0237344	up-down	41.38	45.98	40.13	48.17	54.97	48.76	33.93	35.71	43.98	others
CsaV3_2G029060	30.33	38.31	36.47	54.89	60.41	80.98	34.33	30.8	39.16	0.0362018	0.978376	0.0227792	up-down	43.86	45.23	40.8	39.58	39.81	37.75	53.27	58.28	34.09	others
CsaV3_2G029130	319.19	208.43	222.76	817.67	683.8	549.09	325.81	320.64	272.5	2.26e-05	0.77543	0.000470421	up-down	607.67	508.42	425.88	1043.96	1290.25	1251.69	328.08	358.83	514.29	up
CsaV3_2G029190	76.39	108.75	93.76	181.68	175.52	213.17	66.76	85.04	89.14	0.00245662	0.793964	5.81e-05	up-down	74.61	72.49	88.12	68.11	83.8	58.71	65.67	60.95	85.06	others
CsaV3_2G029630	140.3	76.82	83.44	349.58	259.31	150.13	80.9	134.05	98.34	0.0294463	0.995935	0.00906324	up-down	194.42	235.14	353.86	47.48	68.87	57.41	64.3	188.5	297.47	down
CsaV3_2G029890	0.52	0	0	14.58	5.53	2.76	0	0.49	0.28	0.00118592	NA	0.000522694	up-down	7.2	2.63	10.09	0	0	0	0	1.94	18.28	down
CsaV3_2G029950	1.94	3.76	3.51	20.75	20.69	16.05	1.57	3.5	9.92	2.55e-11	0.816895	0.00375146	up-down	9.5	8.56	14.71	3.9	1.52	2.33	3.27	8.01	7.77	down
CsaV3_2G029960	14.31	26.8	25.57	58.68	62.79	40.64	21.07	22.19	39	0.00461867	0.871563	0.042376	up-down	16.99	20.69	31.29	9.48	5.42	3.85	13.86	21.17	27.54	down
CsaV3_2G029990	24.76	22.66	24.7	98.65	60.19	51.25	21.54	33.24	32.58	0.000294306	0.837529	0.00566527	up-down	12.17	39.2	35.22	8.53	20.13	6.36	14.73	19.75	42.97	others
CsaV3_2G030080	13.05	10.07	13.27	56.99	60.73	36.86	7.67	3.78	13.8	9.49e-06	0.819008	3.95e-06	up-down	24.63	13.1	32.84	5.55	10.44	7.73	7.76	5.13	37.95	down
CsaV3_2G030300	60.88	68.5	63.36	168.57	177.89	151.44	82.62	70.53	94.49	1.9e-08	0.582528	0.00102832	up-down	42.01	46.08	58.6	8.74	13.7	12.67	37.93	44.76	28.38	down
CsaV3_2G030320	91.9	215.27	118.37	201.19	582.98	310.8	33	34.69	53.57	0.0414536	1.78e-05	2.52e-14	up-down	38.19	60.79	70.99	143.04	200.08	102.67	52.81	81.19	32.88	up
CsaV3_2G030340	3.47	6.49	4.21	49.32	51.37	51.81	3.62	6.41	7.72	1e-23	0.911944	3.99e-18	up-down	14.55	20.73	15.57	13.74	11.48	4.89	10.27	11.18	6.97	others
CsaV3_2G030360	43.16	58.33	66.34	119.03	130.81	136.73	29.09	42.68	60.63	0.000993943	0.766195	6.66e-05	up-down	39.96	64.87	56.74	61.32	61.6	51.6	60.1	100.99	50.46	others
CsaV3_2G030570	53.74	83.76	69.38	277.58	338.72	289.33	32.22	50.07	64.39	6.17e-16	0.309153	5.95e-23	up-down	135.49	100.03	136.88	82.36	115.32	61.88	59.96	52.25	177.32	others
CsaV3_2G030770	24.29	31.27	40.17	66.92	69.15	60.68	20.98	26.06	38.42	0.00524563	0.903567	0.00118398	up-down	42.49	34.91	36.86	50.55	74.65	44.49	40.67	30.47	45.24	up
CsaV3_2G031180	9.84	16.36	19.28	44.72	37.48	40.18	17.88	17.61	19.6	0.000119787	0.858242	0.000109342	up-down	263.1	213.27	183.42	280.95	422.24	184.05	210.69	162.57	364.39	others
CsaV3_2G031230	106.84	53.45	45.07	372.56	199.36	242.42	92.53	94.88	69.24	0.000269141	0.880345	1.6e-05	up-down	161.02	175.24	158.39	295.17	286.12	234.72	89.63	111.34	161.27	up
CsaV3_2G031310	14.99	18.51	17.53	36.1	30.8	31.97	16.58	15.9	18.25	0.0111026	0.983791	0.0102913	up-down	13.11	12.93	11.9	10.16	10.84	9.75	18.03	23.48	14.63	others
CsaV3_2G031820	0	0.06	0.05	1.39	2.83	1.39	0.06	0.18	0	5.06e-05	NA	2.85e-05	up-down	0	0.19	0	0	0	0.07	0	0.18	0	others
CsaV3_2G032000	13.75	15.57	12.19	48.17	30.91	19.02	13.58	14.71	12.54	0.0342435	0.979381	0.0150722	up-down	18.07	28.78	30.03	20.09	26.41	13.75	17.6	21.25	35.98	others
CsaV3_2G032060	17.57	34	27.51	41.47	66.24	35.18	30.44	12.85	21.7	0.0158058	0.945947	0.00426156	up-down	47.11	34.29	39.6	20.8	33.72	26.44	17.14	31.13	54.53	others
CsaV3_2G032120	0.95	1.44	2.14	4.49	8.48	4.47	0.73	0.67	1.87	0.00335034	0.874853	0.00029608	up-down	2.03	2.3	2.62	0.27	0	0.2	0.52	1.98	2.15	down
CsaV3_2G032190	557.03	189.89	186.37	2294.46	686.44	1600.33	399.96	466.64	141.51	0.000737487	0.980046	0.000243929	up-down	66.46	234.6	127.21	431.66	481.17	376.76	225.62	471.54	70.67	up
CsaV3_2G032230	1.01	1.78	2.77	5.72	8.87	6.43	2.82	0.95	1.66	0.033326	0.993124	0.0331403	up-down	2.9	2.71	7.49	1.43	0.93	0.64	0.32	0.44	5.23	others
CsaV3_2G032250	1.3	1.34	0.55	6.92	4.73	5.25	0.72	1.11	1.32	7.32e-05	0.990973	1.1e-05	up-down	2.7	1.81	1.81	0.6	0.06	0.98	0.53	0.49	2.19	others
CsaV3_2G032310	20.22	24.95	26.06	72.14	90.49	53.92	20.14	19.71	24.07	3.31e-07	0.806002	1.7e-09	up-down	19.21	29.46	20.59	22.14	32.79	24.24	10.88	7.88	14.82	others
CsaV3_2G032380	14.3	16.63	18.17	35	26.14	30.73	17.23	12.36	9.32	0.0377715	0.653221	0.00050966	up-down	3.57	5.88	2.61	2.3	2.91	0.71	3.28	7.28	5.9	others
CsaV3_2G032460	6.26	6.51	3.45	245.37	111.7	44.39	3.95	3.95	3.43	2.14e-13	0.722819	3.17e-21	up-down	22.78	15.05	32.83	4.43	1.8	1.1	2.85	3.98	58.23	down
CsaV3_2G033050	363.55	461.82	295.34	1134.84	1268.98	907.37	235.65	348.76	504.39	1.66e-06	0.970706	1.44e-05	up-down	552.27	620.96	627.49	46.08	53.11	46.7	166.3	229.99	263.16	down
CsaV3_2G033330	16.52	18.71	16.32	37.52	37.19	22.86	15.68	15.43	17.67	0.0324373	0.919023	0.00780757	up-down	4.72	4.64	5.02	4.38	1.3	1.19	3.95	3.06	6.12	others
CsaV3_2G033620	2.75	3.95	2.84	7.53	8.5	5.85	4.19	3.68	4.08	0.00360582	0.785605	0.0398202	up-down	4.28	4.89	5.02	0.84	2.99	1.26	0.97	2.16	7.8	down
CsaV3_2G033650	2.99	5.2	4.41	48.33	41.09	29.41	3.48	3.69	5.74	9.59e-20	0.998717	2.66e-20	up-down	15.6	13.21	33.18	8.57	3.4	3.44	1.98	5.58	33.85	down
CsaV3_2G033660	20.55	9.48	6.86	1076.37	266.19	504.32	9.02	30.26	14.17	2.76e-16	0.928932	6.8e-17	up-down	47.49	57.65	98.56	10.22	15.34	9.86	5.31	25.61	88.98	down
CsaV3_2G033690	27.48	21.3	22.82	174.61	93.04	86.62	17.7	29.56	31.01	3.47e-08	0.9691	1.35e-07	up-down	62.32	58.42	63.66	58.45	60.45	49.98	22.03	30.21	88.05	others
CsaV3_2G033710	0.55	0.56	0.42	4.14	2.54	3.24	0.69	0.26	0.72	4.85e-06	0.990973	3.63e-05	up-down	1.15	1.17	2.57	0.68	1.11	0.95	0.09	0.52	9.03	others
CsaV3_2G033790	2.22	2.34	2.75	7.68	6.74	4.91	2.73	1.72	3.05	0.00113282	0.992257	0.00214019	up-down	2.49	2.26	2.56	0.98	1.64	0.3	0.86	2.69	8.51	others
CsaV3_2G034500	32.85	29.38	32.3	146.44	145.56	90.81	21.25	22.38	51.03	6.1e-08	0.990973	2.38e-05	up-down	25.45	21.13	52.25	5.73	4.36	3.71	5.91	12.36	70.02	down
CsaV3_2G034570	4.39	10.86	8.71	17.55	25.63	19.4	3.46	3.94	7	0.0249803	0.63732	4.9e-05	up-down	13.44	40.82	52.21	3.44	2.16	2.76	6.87	13.18	34.72	down
CsaV3_2G034610	21.46	22.49	18.96	33.52	49.17	45.61	6.79	11.26	22.79	0.00704912	0.524608	0.0012329	up-down	5.57	14.32	15.25	6.26	19.17	25.53	31.48	38.46	11.25	others
CsaV3_2G034680	16.31	31.65	24	148.96	135.54	101.16	23.02	17.79	29.73	4.93e-13	0.979381	1.8e-17	up-down	5.36	5.36	4.38	2.55	3.59	3.8	4.09	5.77	3.91	others
CsaV3_2G034700	51.45	33.66	36.19	392.1	107.96	137	20.29	56.97	43.65	0.000114802	0.9906	0.016159	up-down	81.86	92.77	130.75	27.43	23.28	28.52	52.07	87.68	92.9	down
CsaV3_2G034720	19.5	35.73	31.77	280.25	158.51	118.66	12.44	15.42	22.23	1e-09	0.121097	1.66e-19	up-down	44.77	30.09	43.59	20.32	13.06	7.98	16.1	25.16	45.87	down
CsaV3_2G034740	0.69	0.75	0.79	3.46	3.62	4.13	0.62	1.28	1.44	9.75e-07	0.807696	0.00176891	up-down	1.01	1.57	3.05	0.54	1.01	0.93	4.75	3.66	2.27	others
CsaV3_2G034860	2.1	2.59	2.14	15.64	14.96	13.45	1.92	2.48	2.08	2.03e-22	0.9691	5.61e-20	up-down	2.64	3.84	2.43	1.71	2.33	3.69	1.05	3.25	3.77	others
CsaV3_2G035520	13.84	14.63	19.59	42.69	35.96	37.07	8.77	9.18	9.54	0.000532946	0.0887572	4.82e-11	up-down	31.59	28.81	30.37	45.48	44.93	30.78	37.24	29.82	56.43	others
CsaV3_2G035630	10.65	22.28	18.67	57.89	37.81	35.16	14.03	13.71	21.62	0.00465622	0.9691	0.000264601	up-down	38.65	39.43	61.1	16.69	12.47	5.56	15.5	23.88	51.06	down
CsaV3_2G035690	12.02	9.1	9.86	18.63	18.69	15.16	7.61	13.97	8.93	0.00592165	0.850191	0.00206871	up-down	2.6	3.04	2.39	2.43	2.5	3.24	1.98	4.14	2.91	others
CsaV3_2G035810	2.55	2.13	0.99	362.83	89.33	52.83	5.1	7.82	5.35	8.68e-10	0.0160097	9.73e-07	up-down	26.12	24.71	31.45	1.13	0.75	0.75	1.45	9.6	52.49	down
CsaV3_2G035840	9.66	8.48	11.17	18.83	18.87	17.47	11.71	13.02	12.81	0.00858197	0.943738	0.0248054	up-down	11.28	9.29	10.58	7.61	10.42	8.24	10.7	9.24	12.8	others
CsaV3_2G036170	0.05	0.06	0.03	1.97	1.61	0.61	0.03	0	0.03	2.35e-06	NA	4.96e-06	up-down	0.03	0.2	0.05	0	0.08	0	0	0.26	0.7	others
CsaV3_2G036190	6.71	2.92	3.94	62.58	38.81	18.58	3.16	7.09	5.29	6.43e-08	0.96564	3.99e-09	up-down	9.42	15.09	13.21	0.32	0.39	0.21	0.29	0.96	3.44	down
CsaV3_2G036220	2.28	3.88	3.67	11.85	14.29	6.99	2.33	2.04	3.3	0.000107174	0.743581	1.46e-07	up-down	4.4	2.84	6.16	0.43	0.2	0	0.3	1.08	8.28	down
CsaV3_2G036360	27.61	29.32	30.32	203.86	110.62	127.02	35.6	34.24	41.71	2.68e-11	0.507682	6.34e-09	up-down	14.54	30.66	24	12.6	18.39	11.75	23.85	24.72	11.79	others
CsaV3_3G000230	9.64	11.32	12.51	28.14	34.68	15.98	13.33	10.45	12.99	0.027614	0.966661	0.0451764	up-down	22.36	24.93	25.16	5.88	3.9	5.36	9.5	12.74	37.98	down
CsaV3_3G000330	27.6	42.45	57.63	99.61	129.6	88.62	68.64	47.93	63.66	0.00137692	0.70379	0.0118298	up-down	18.05	19.5	21.04	8.57	13.65	20.46	18.45	33.88	42.92	others
CsaV3_3G000390	56.24	77.43	63.7	130.55	136.37	119.25	56.41	50.14	64.38	0.00132248	0.751705	8.79e-06	up-down	9.46	14.42	22.83	8.01	15.22	8.19	19.57	16.98	23.37	others
CsaV3_3G000400	0.48	0.36	0.07	41.52	35.47	13.84	0.63	0.4	0.2	3.21e-23	0.9593	1.52e-27	up-down	5.36	7.88	9.9	1.07	0	0	0.06	0.6	19.15	others
CsaV3_3G000410	18.2	31.21	28.96	82.56	71.23	61.9	21.94	22.32	36.62	6.99e-05	0.996313	9.6e-05	up-down	17.63	12.78	18.17	12.13	11.97	13.98	15.02	17.64	24.11	others
CsaV3_3G000570	13.35	12.02	11.61	92.3	55.02	36.15	16.26	16.61	14.82	3.96e-07	0.647101	5.21e-06	up-down	18.55	19.14	26.95	7.26	15.34	8.77	5.95	11.68	50.75	others
CsaV3_3G000690	77.77	48.14	58.28	262.14	170.11	237.54	65.43	72.33	62.47	2.24e-06	0.9691	4.18e-08	up-down	109.06	117.12	90.69	181.38	213.99	176.61	71.93	76.29	106.9	up
CsaV3_3G000720	40.24	28.93	21.35	107.76	74.99	74.05	27.04	38.24	30.2	0.00141669	0.990973	8.08e-05	up-down	38.22	36.5	24.85	49.98	61.27	40.37	25.06	28.15	29.07	up
CsaV3_3G000880	33.5	56.16	42.34	84.38	127.59	104.16	34.41	39.73	49.44	0.000956431	0.942926	3.09e-05	up-down	17.18	18.07	34.4	6.91	9.38	5.44	39.77	34.16	15	down
CsaV3_3G001050	0.41	0.58	0.67	3.45	6.35	1.99	0.84	0.9	0.73	5e-05	0.938936	0.000244219	up-down	3.13	3.98	5.72	0	0.32	0.09	0.2	1.51	4.06	down
CsaV3_3G001250	111.33	95.81	100.38	258.78	199.27	245.69	68.34	100.36	131.8	0.000232003	0.969821	0.0016044	up-down	166.6	195.05	194.68	190.89	263.46	158.27	187.52	165.42	200.08	others
CsaV3_3G001370	156.52	211.77	194.23	304.39	343.9	260.06	120.44	131.41	143.65	0.0409154	0.0581517	2.88e-06	up-down	160.65	146.26	125.97	102.29	136.01	121.62	109.07	124.15	116.47	others
CsaV3_3G001460	25.25	24.87	27.19	316.03	148.34	175.25	33.15	31.22	37.33	1.56e-14	0.657757	1.7e-12	up-down	86.95	88.79	87.34	58.61	66.22	64.34	31.2	53.75	93.3	others
CsaV3_3G001660	2.06	1.46	0.68	9.02	7.76	5.35	1.64	2.27	0.14	0.00073457	0.985958	0.00386184	up-down	0.72	0.55	2.89	4.03	7.14	3.8	0.59	0.44	0.62	up
CsaV3_3G001730	8.33	10.46	10.31	21.71	23.97	17.22	10.55	13.42	12.75	0.00261389	0.72351	0.0362504	up-down	12.4	13.81	14.24	10.18	11.74	12.79	8.28	9.91	16.76	others
CsaV3_3G002010	23.9	34.32	37.33	62.79	73.68	52.64	17.06	23.26	21.05	0.0100399	0.144042	7.07e-08	up-down	41.25	41.25	53.2	31.53	33.65	40.47	40.56	44.13	58.29	others
CsaV3_3G002090	108.86	88.37	103.55	282.41	282.5	158.3	75.94	97.95	88.42	0.00291174	0.787257	5.19e-05	up-down	60.17	65.76	73.52	31.23	32.08	40.71	39.87	56.34	49.11	down
CsaV3_3G002160	11.73	19.39	18.46	43.37	45.33	32.93	17.17	14.88	15.89	0.00118466	0.973698	6.91e-05	up-down	14.52	17.83	26.77	2.32	6.11	2.13	10.55	17.79	30.9	down
CsaV3_3G002220	32.36	41.36	33.4	69.36	114.01	61.55	32.99	26.65	31.54	0.00703329	0.738185	0.00015456	up-down	57.96	64.33	62.66	43.33	51.64	78.13	43.35	53.95	97.97	others
CsaV3_3G002240	10.87	6.75	2.58	154.04	64.75	49.61	1.28	1.24	6.58	3.94e-06	NA	5.56e-08	up-down	65.42	42.45	145.56	37.96	58.43	17.06	1.72	16.55	231.64	others
CsaV3_3G002250	15.7	11.18	12.47	54.92	43.98	31.59	14.05	14.31	14.32	7.43e-07	0.993124	1.42e-07	up-down	12.21	19.71	21.41	6.54	12.21	10.51	4.45	8.09	27.91	others
CsaV3_3G002260	24.91	45.87	43.72	75.26	104.22	76.38	37.01	24.59	35.73	0.0141612	0.870588	0.000187245	up-down	36.18	41.07	44.16	20.63	23.77	37.01	34.01	50.37	44.13	others
CsaV3_3G002460	12.27	13.83	10.03	99.24	103.49	50.58	3.2	8.77	13.74	1.18e-12	0.772877	7.75e-11	up-down	38.16	21.72	58.85	10.09	8.27	4.49	6.06	17.72	34.12	down
CsaV3_3G002510	1.6	2.24	1.64	15.67	8.16	6.48	2.14	2.65	2.97	0.000199787	0.856173	0.0022228	up-down	2.31	1.6	0.98	11.5	31.12	8.43	2.48	2.8	3.43	up
CsaV3_3G002720	72.16	115.05	113.33	250.07	275.68	352.57	66.54	83.23	121.17	1.67e-05	0.912013	1.29e-06	up-down	115.34	124.12	167.45	160.29	180.37	106.16	117.26	117.37	147.66	others
CsaV3_3G002730	5.18	5.04	4.61	12.2	8.41	10.11	0.82	4.65	3.8	0.0379116	0.713648	0.0157542	up-down	19.06	18.11	14.89	10.81	28.37	8.34	13.15	10.98	23.5	others
CsaV3_3G002750	15.51	14.86	9.98	31.95	28.09	23.85	4.85	5.2	4.18	0.0256072	0.000193644	2.3e-15	up-down	4.29	9.23	11.78	8.66	10.33	4.5	8.83	10.77	8.07	others
CsaV3_3G002770	57.03	196.93	274.61	4444.23	2218.81	2369.4	38.86	33.2	27.37	2.82e-13	1.03e-05	1.5e-76	up-down	39.14	71.86	58.91	382.86	171.82	327.16	4.94	11.4	30.38	up
CsaV3_3G002780	2.75	2.48	7.49	252.89	125.09	152.07	0.51	2.38	0.5	3.3e-34	0.134878	4.48e-50	up-down	0.15	2.11	0.14	18.42	2.06	25.06	0	0.42	0.2	up
CsaV3_3G003030	7.78	8.07	6.43	22.09	26.5	26.86	12.89	6.96	8.56	1.22e-07	0.840292	0.000686682	up-down	2.04	2.18	1.16	0.72	0.63	1.51	0.8	1.33	0.85	others
CsaV3_3G003480	5.64	5.78	5.33	30.55	18.66	11.6	4.78	5.39	6.29	0.000176491	0.973496	2.89e-05	up-down	18.08	14.45	32.56	0.95	1.07	0.71	1.31	5.6	30.23	down
CsaV3_3G003750	36.35	32.03	34.16	77.84	65	61.88	30.06	34.98	30.63	0.00316568	0.907654	0.00051998	up-down	42.43	37.94	44.26	57.03	58.45	38.69	29.07	23.99	39.3	others
CsaV3_3G003990	34.51	38.38	34.92	155.69	184.58	140.11	27.11	31.93	27.26	7.48e-25	0.44728	1.91e-25	up-down	32.4	35.42	35.18	12.06	11.7	24.09	21.46	22.33	28.07	down
CsaV3_3G004040	2.82	6.44	4.04	138.21	363.63	217.98	3.15	3.09	10	1.85e-32	0.949353	2.03e-37	up-down	8.43	12.91	13	23.19	18.18	13.07	4.84	6.08	4.15	others
CsaV3_3G004150	11.82	19.61	15.32	36.14	38.17	40.14	13.7	15.85	15.49	0.000149451	0.999299	5.4e-06	up-down	9.89	9.79	9.88	19.58	14.63	15.81	9.43	8.99	17.69	up
CsaV3_3G004440	20.02	24.64	24.75	51.93	58.29	42.18	29.41	22.59	28.91	0.000449846	0.858225	0.0128127	up-down	16.61	12.4	11.84	13.55	14.88	15.87	18.18	17.58	26.48	others
CsaV3_3G004450	10.83	10.26	8.6	32.13	33.34	17.25	6.42	9.44	10.43	0.00120622	0.869318	8.15e-05	up-down	6.86	9.18	9.6	0.98	0.67	0.27	1.22	2.84	11.16	down
CsaV3_3G004560	13.19	16.54	16.1	68.2	88.34	44.78	12.5	7.69	13.92	7.82e-08	0.687557	2.84e-10	up-down	34.79	12.57	33.22	5.18	6.96	5.33	4.36	7.47	33.98	down
CsaV3_3G004570	19.71	27.14	25.11	36.97	46.68	41	24.81	19.69	25.3	0.0378965	0.963812	0.0187777	up-down	18.53	15.16	17.27	10.66	12.8	12.21	14.74	17.91	19.33	others
CsaV3_3G004810	38.13	27.51	22.96	178.71	95.71	120.1	58.07	61.79	31.89	7.16e-07	0.347702	0.00494112	up-down	37.44	40.36	40.59	74.63	64.3	70.8	21.48	26.54	43.67	up
CsaV3_3G004820	19.13	19.17	21.04	33.73	33.09	37.54	14.07	18.16	20.31	0.0223828	0.837529	0.00661545	up-down	11.65	12.6	16.36	10.95	11.89	10.45	8.66	10.65	13.5	others
CsaV3_3G004830	22.08	51.65	43.11	72.92	90.05	86.23	18.7	21.45	40.32	0.0434495	0.656759	8.57e-05	up-down	68.61	81.28	108.32	41.61	53.34	32.63	79.72	84.32	82.02	down
CsaV3_3G004850	16.16	7.76	9.46	102.55	33.94	31.32	20.97	18.11	13.53	0.000601886	0.555154	0.00534032	up-down	16.25	33.4	31.27	10.31	27.31	4.31	1.67	7.1	44.41	others
CsaV3_3G005500	12.55	22.43	15.09	149.58	102.4	86.15	12.45	20.64	60.26	1.9e-08	0.710505	0.00602417	up-down	99.26	77.4	197.21	9.77	9.1	5.9	20.81	54.47	129.6	down
CsaV3_3G005530	102.45	52.9	60.68	266.22	168.8	113.71	75.15	83.8	49.2	0.0294463	0.976354	0.0050655	up-down	57.46	180.24	160.97	49.79	37.17	40.09	13.12	43.56	119.4	down
CsaV3_3G005790	7.31	9.84	10.69	24.79	33.65	13.85	9.69	10.78	12.64	0.00881287	0.854524	0.0276901	up-down	22.82	20.35	30.82	10.27	5.64	8.4	7.24	10.94	22.51	down
CsaV3_3G005840	7.64	10.53	5.86	25.82	22.76	15.45	8.65	7.65	9.52	0.00189194	0.976327	0.000263503	up-down	7.51	14.26	15.3	2.25	1.72	3.25	5.24	8.89	21.66	down
CsaV3_3G005900	0	0.6	0	34.72	24.64	9.56	0	0.24	0	3.73e-07	NA	9.13e-08	up-down	11.07	14.58	31.59	0.58	4.23	0.65	1.75	7.85	24.32	down
CsaV3_3G007020	19.48	23.91	23.48	37.31	37.87	37.57	20.08	21.93	25.19	0.0149476	0.988655	0.0279709	up-down	14.21	14.33	16.61	7.69	9.05	7.58	19.25	15.91	16.13	down
CsaV3_3G007090	39.62	57.71	50.63	79.15	114.41	88.61	40.03	29.19	50.8	0.0379475	0.686709	0.000769174	up-down	15.42	33.47	23.76	4.18	7.24	16.55	27.42	46.21	10.72	down
CsaV3_3G007260	1.07	1.22	1.52	33.27	5.52	2.21	0.39	1.33	0.38	0.0106665	NA	0.00142535	up-down	0.95	3.19	3.22	0	0	0	0.19	0.34	0	down
CsaV3_3G007470	19.16	38.97	29.08	49.87	87.73	54.46	34.59	19.45	28.81	0.0137821	0.926246	0.00259807	up-down	36.69	33.57	27.39	18.53	37.34	24.37	24.14	28.79	29.19	others
CsaV3_3G007490	2.78	3.05	2.41	17.37	9.6	11.23	1.79	1.68	3.06	0.000330619	0.919546	5.55e-05	up-down	10.43	6.04	4.79	9.99	6.92	14.53	9.52	6.67	6.41	others
CsaV3_3G007520	0.34	0.4	0	20	11.91	6.72	0.96	0.8	1.31	7.08e-08	NA	2.78e-07	up-down	19.49	30.92	26.36	0.91	4.19	3.22	0.63	2.45	55.44	down
CsaV3_3G007900	9.23	11.35	8.37	44.99	36.05	22.88	5.02	6.99	7.24	0.000621493	0.710505	3.73e-06	up-down	6.25	12.75	13.03	23.49	27.87	23.02	11.3	7.75	23.85	up
CsaV3_3G008040	2.38	1.02	1.9	14.23	13.19	10.59	0.73	1.02	0.95	9.9e-06	0.770967	5.97e-08	up-down	12.29	11.67	12.17	12.33	11.54	7.24	4.78	13.47	16.34	others
CsaV3_3G008170	13.31	21.66	11.27	245.09	284.63	139.64	12.95	20.52	44	9.89e-23	0.596276	2.49e-11	up-down	55.01	46.54	82.68	10.76	3.43	1.02	5.47	27.17	69.06	down
CsaV3_3G008410	13.19	24.58	22.63	47.91	66.69	34	30.61	15.79	21.24	0.0116435	0.954686	0.0283718	up-down	76.12	53.82	48.78	25.42	38.08	33.49	35.87	40.81	49.29	others
CsaV3_3G008460	3.22	1.09	1.04	43.52	37.67	29.71	0	0.98	0	8.99e-06	NA	1.18e-05	up-down	5.24	1.9	1.73	12.72	0.53	0.36	0.27	0.5	3.23	others
CsaV3_3G008760	5.39	9.44	10.72	24.03	36.82	15.98	6.62	5.25	7.53	0.00299699	0.721408	2.83e-06	up-down	27.51	22.81	26.76	3.68	11.73	6.87	13.69	18.97	31.85	down
CsaV3_3G008890	85.66	139.37	135.61	210.69	276.26	286.89	82.2	112.81	138.09	0.00377086	0.935417	0.000635868	up-down	66.67	73.92	77.4	38.39	48.69	49.5	73.83	72.39	75.54	others
CsaV3_3G009150	108.69	71.32	100.74	325.82	304.82	204.07	120.48	162.1	138.64	6.17e-05	0.345468	0.0125057	up-down	50.92	34.05	70.06	26.12	20.38	19.95	25.04	34.2	73.12	down
CsaV3_3G009160	2.45	2.47	2.65	333.38	146.25	105.87	0.67	1.72	2.65	2.5e-27	0.885697	2.92e-30	up-down	2.65	0.81	1.42	0	0	0	0	0.8	6.44	down
CsaV3_3G009180	0	0	0	26.35	8.42	3.58	0	0.18	0	2.83e-07	NA	2.31e-06	up-down	1.36	1.56	5.46	0	0	0.72	0.27	0.62	6.87	down
CsaV3_3G009410	27.95	36.54	42.93	105.15	134.07	112.48	35.88	28.87	47.44	4.8e-06	0.993124	1.34e-05	up-down	26.23	22.59	30.87	72.43	60.99	88.11	11.33	19.68	24.98	up
CsaV3_3G009510	2.28	3.28	2.6	9.26	7.83	4.69	1.39	3.51	3.14	0.00997119	0.969924	0.0123882	up-down	7.81	5.54	9.69	0.33	2.42	0.33	2.46	3.27	11.37	down
CsaV3_3G009530	11.02	13.7	14.9	23.3	39.61	27.32	14.46	11.76	18.27	0.00426623	0.942492	0.0196285	up-down	7.12	11.8	9.67	5.85	14.83	6.42	15.77	15.61	26.23	others
CsaV3_3G009670	96.69	41.98	49.87	265.67	162.99	178.7	56.56	93.55	76.03	0.0019688	0.924336	0.000336103	up-down	133.74	129.87	112.81	187.05	203.67	159.87	58.45	89.4	117.43	up
CsaV3_3G010180	167.6	246.35	142.81	439.61	523.58	410.76	226.92	177.49	230.61	0.00922502	0.949579	0.0127416	up-down	586.82	511.56	647.89	753.34	824.68	513.3	528.03	531.65	866.93	others
CsaV3_3G010840	43.41	57.73	45.41	222.99	278.54	212.94	32.42	29.09	39.77	7.32e-20	0.195675	1.44e-30	up-down	7.32	9.7	15.53	15.49	23.66	25.71	15.29	32.01	22.56	up
CsaV3_3G010860	12.01	16.41	14.56	20.83	30.61	28.36	13.74	13.6	14.78	0.0312865	0.970259	0.0131885	up-down	8.95	8.41	8.04	13.41	9.28	14.23	11.59	10.27	8.59	up
CsaV3_3G011350	12.11	15.7	16.11	25.13	27.46	24.03	11.96	13.11	16.84	0.0110589	0.9593	0.0157217	up-down	12	12.54	13.1	4.64	5.38	5.52	8.06	13.09	13.56	down
CsaV3_3G011450	5.97	5.84	5.69	270.75	107.5	129.65	7.43	9.33	9.08	3.2e-26	0.687557	1.49e-24	up-down	33.57	48.53	46.37	17.11	17.47	10.47	12.69	20.58	29.56	down
CsaV3_3G011460	729.47	660.79	507.52	4148.5	2326.18	2065.78	747.14	621.77	1104.68	1.01e-07	0.72725	8.12e-06	up-down	1334.64	1521.29	1645.14	359.36	311.39	333.24	786.96	989.68	1143.87	down
CsaV3_3G011890	7.5	9.62	8.79	30.96	27.53	21.33	6.94	6.17	9.42	1.92e-07	0.817404	3.53e-09	up-down	6.89	9.66	8.3	1.26	3.55	2.11	2.39	3.84	17.37	down
CsaV3_3G011970	33.25	29.03	33.52	115.9	140.77	87.15	23.67	39.8	20.02	3.72e-05	0.942492	3.29e-05	up-down	266.47	267.98	254.97	680.05	678.12	484.58	281.14	198.72	279.11	up
CsaV3_3G012090	20.98	23.7	20.86	36.42	42.64	38.43	21.77	22.58	24.9	0.00971577	0.97672	0.0296087	up-down	5.9	9.22	5.65	4.91	6.37	5.41	5.89	7.88	4.46	others
CsaV3_3G012170	2.42	5.24	3.34	47.23	52.58	27.51	1.59	2.85	6.21	2.56e-13	0.990195	7.31e-12	up-down	29.29	25.69	98.27	4.28	3.69	3.38	11.13	41.01	45.98	down
CsaV3_3G012250	25.71	18.42	18.92	51.94	37.94	40.37	19.29	24.55	21.34	0.0254073	0.99716	0.0123586	up-down	13.15	15.07	16.8	7.82	10.27	7.47	15.63	16.14	26.82	others
CsaV3_3G012270	6.1	2.77	1.18	146.87	50.4	21.05	0.77	2.53	6	0.000287092	0.973542	0.00019767	up-down	74.07	138.67	170.01	2	6.02	1.03	0.68	19.67	109.28	down
CsaV3_3G012290	0.56	1.47	0.74	8.74	7.6	3.95	0.32	1.94	2.93	2.83e-05	0.798604	0.0208443	up-down	4.09	10.11	7.54	0.3	2.71	1.01	2	3.02	20.04	down
CsaV3_3G012590	14.56	21.38	17.58	127.35	102.6	47.05	8.08	14.54	17.73	2.11e-07	0.681133	9.61e-10	up-down	30.33	19.79	23.16	19.1	17	23.27	8.7	9.05	39.84	others
CsaV3_3G012700	17.01	12.56	12.75	82.16	54.31	35.65	12.64	18.36	17.54	1.06e-05	0.929364	1.36e-05	up-down	34.88	33.84	54.31	5.11	5.8	3.27	6.6	14.06	73.81	down
CsaV3_3G012800	1.96	1.09	5.13	36.61	13.82	8.48	2.59	5.02	2.58	0.00763068	0.9691	0.00670076	up-down	18.98	13.21	31.04	0.38	2.08	0	0.42	8.24	28.57	down
CsaV3_3G013100	86.89	37.99	37.16	355.75	151.33	208.66	59.41	82.27	51.54	0.000301421	0.935417	2.39e-05	up-down	95.48	125.85	90.3	159.69	189.83	122.02	50.72	68.31	114.34	up
CsaV3_3G013140	25.9	50.26	41.75	394.26	274.12	304.74	22.57	32.8	61	4.01e-18	0.986839	3.91e-15	up-down	81.22	57.63	170.56	25.8	8.66	10.13	20.99	66.39	107.22	down
CsaV3_3G013150	1.6	4.31	1.01	16.31	19.09	14.37	2.31	3.02	2.77	2.51e-05	0.970345	1.81e-06	up-down	6.12	3.98	7.65	5.69	3.82	6.67	1.5	3.06	3.38	others
CsaV3_3G013240	28.96	36.56	39.68	66.13	71.48	72.88	42.01	28.91	39.57	0.00428661	0.98731	0.0164474	up-down	22.29	34.55	25.49	40.47	42.13	39.47	33.97	37.12	35.62	up
CsaV3_3G013680	1.72	0.19	0.09	69.96	20.36	8.7	0	0.59	1.5	0.00109293	0.995935	0.00174577	up-down	1.19	21.33	18.83	12.71	13.3	5.03	0	2.45	3.3	others
CsaV3_3G014000	7.2	6.46	4.79	28.57	21	10.54	5.29	6.3	5.5	0.00502169	0.952618	0.000578163	up-down	14.75	22.58	22.6	6.11	7.1	4.3	3.09	6.45	24.88	down
CsaV3_3G014560	42.1	52.09	49.94	114.76	117.34	120.64	74.58	51.14	59.02	2.52e-05	0.7736	0.0228695	up-down	59.93	82.34	126.05	112.66	92.17	111.73	87.61	94.7	110.67	others
CsaV3_3G014820	1.71	1.25	1.77	19.07	55.42	24.11	1.78	0.53	7.71	1.11e-06	NA	0.000332415	up-down	0.46	0	0.81	3.23	4.82	3.01	0.45	3.52	0.89	up
CsaV3_3G014830	12.36	12.19	8.32	28.07	37.98	19.96	7.19	10.06	6.94	0.00129888	0.525902	1.1e-06	up-down	6.03	10.44	11.97	6.57	7.68	11.38	7.87	10.75	6.69	others
CsaV3_3G014860	9.29	16.17	9.2	59.95	55.19	44.66	5.25	15.54	28.39	3.78e-09	0.854892	0.00603887	up-down	66.57	29.59	64.96	13.94	12.15	8.93	16.58	23.98	50.92	down
CsaV3_3G015240	276.69	117.59	56.96	2151.43	1087.44	981.59	69.52	110.85	75.7	6.49e-07	0.522437	1.46e-27	up-down	181.03	102.39	335.03	53.15	27.62	12.4	12.78	55.4	247.28	down
CsaV3_3G015290	1.75	0.99	1.05	9.55	3.59	7.34	0.81	1.55	2.35	0.00164871	0.962016	0.00512696	up-down	1.51	2.08	2.88	1.96	2.51	1.86	2.06	2.93	5.09	others
CsaV3_3G015650	49.05	56.38	50.7	145.33	111.87	74.64	48.44	44.52	66.63	0.029409	0.998717	0.0329979	up-down	25.67	28.76	35.08	13.32	18.48	14.07	16.13	24.31	45.54	others
CsaV3_3G015880	35.38	62.81	60.29	80.13	125.21	124.92	42.97	45.96	63.77	0.0283448	0.9691	0.00449072	up-down	40.19	30.9	33.1	40.85	32.65	35.79	41.16	34.07	31.94	others
CsaV3_3G016150	14.35	19.11	22.82	88.89	89.17	40.23	20.54	18.07	19.72	1.82e-05	0.991927	1.93e-06	up-down	79.77	168.13	106.65	19.99	19.94	20.73	26.22	61.5	211.34	down
CsaV3_3G016330	15.5	18.77	14.25	57.36	53.62	40.54	29.55	27.53	25.02	2.2e-07	0.0611641	0.0185399	up-down	14.36	15.51	17.94	27.95	16.47	17.54	16.93	14.46	28.8	others
CsaV3_3G016680	13.36	19.93	16.26	35.28	37.82	32.4	6.47	5.61	10.87	0.0025413	0.0231522	1.12e-09	up-down	9.59	9.52	17.65	9.59	10.41	7.15	8.17	9.76	17.88	others
CsaV3_3G016920	5.45	9.35	5.68	25.49	20.85	11.42	8.65	5.45	6.66	0.00119544	0.997273	0.000754247	up-down	3.98	7.06	5.85	0.38	0.63	0.63	0.93	2.32	12.2	down
CsaV3_3G017360	49.28	87.94	55.47	262.2	276.48	317.39	109.74	109.22	117.98	6.64e-11	0.0679752	2.44e-07	up-down	81.92	80.34	112.9	151.22	100.55	145.47	101.68	107.24	140.87	up
CsaV3_3G018080	4.42	6.7	4.14	12.13	13.62	8.6	1.85	3.05	3.99	0.0179189	0.345468	1.15e-05	up-down	0.71	0.29	0.53	2.02	0.68	0.22	0.32	0.84	0.92	others
CsaV3_3G018200	4.32	5.86	2.86	16.8	15.28	17.03	0.49	1.43	4.04	0.000474193	0.605184	1.07e-05	up-down	1.18	6.46	4.9	4.72	4.42	1.17	2.75	5.66	2.31	others
CsaV3_3G018700	5.07	5.78	5.1	10.48	11.38	11.25	3.88	4.31	6.24	0.0464731	0.943131	0.0278401	up-down	20.23	23.11	24.95	25.69	21.34	15.16	9.42	11.42	27.68	others
CsaV3_3G018960	2.55	1.78	1.69	59.21	12.89	9.93	0.85	7.82	1.71	0.00199009	NA	0.0149294	up-down	2.07	0	4.16	0.46	0.75	0	0	0	3.36	others
CsaV3_3G019240	51.41	52.23	64.88	106.57	97.15	118.76	57.25	68.24	69.55	0.000859198	0.808097	0.0194195	up-down	36.96	36.64	39.75	41.58	40.36	42.63	48.24	45.65	47.5	others
CsaV3_3G019520	9.75	9.88	11.08	23.13	18.91	16.3	11.33	8.93	10.97	0.0157602	0.993124	0.0164969	up-down	6.9	7.85	6.55	4.91	8.12	3.87	5.79	4.88	11.12	others
CsaV3_3G020060	3.77	4.43	2.68	85.35	71.09	38.89	1.99	2.51	4.62	2.68e-18	0.942926	2.63e-20	up-down	89.29	40.44	90.42	3.19	1.01	0.99	2.94	8.74	90.81	down
CsaV3_3G020190	18.41	17.28	19.78	41.81	36.25	39.4	16.56	21.08	21.72	0.000278125	0.969821	0.00352998	up-down	14.24	13.84	15.48	15.7	15.34	14.97	13.26	13.17	19.86	others
CsaV3_3G020490	52.08	82.41	74.86	130.95	140.16	177.37	70.47	68.62	107.38	0.00509359	0.880345	0.0420979	up-down	50.48	55.64	76.56	61.51	46.73	60.77	70	69.91	72.73	others
CsaV3_3G020580	1.16	0.26	0.6	7.61	6.63	3.1	0.49	0.4	1.42	0.000294412	0.990973	0.000207716	up-down	11.04	14.4	22.25	2.82	0.99	0.49	0.09	2.55	23.21	down
CsaV3_3G020960	33.58	42.8	37.03	88.41	86.97	74.3	52.48	42.15	44.22	8.96e-05	0.8825	0.00365201	up-down	88.04	88.51	91.09	68.37	65.94	68.69	66.16	85.67	79.42	others
CsaV3_3G021030	122.69	93.66	94.27	326.49	241.73	225.19	103.98	144.17	159.24	0.000280019	0.67398	0.0158352	up-down	179.51	156.83	193.67	143.72	132.53	106.82	89.06	105.63	199.01	others
CsaV3_3G021200	13.12	21.87	14.38	154.82	95.65	61.04	14.59	17.69	28.44	1.55e-07	0.913874	1.12e-06	up-down	23.15	25.98	32.97	16.34	21.71	11.93	10.17	14.63	34.14	others
CsaV3_3G021800	21.7	12.18	10.32	184.35	160.78	96.3	10.25	16.91	17.5	1.45e-13	0.990848	1.03e-21	up-down	20.86	31.14	30.37	6.44	13.82	17.76	13.19	20.71	8.96	down
CsaV3_3G021840	3.8	3.2	5.45	18.1	16.84	14.12	4.52	4.69	5.42	5.51e-06	0.942926	1.64e-05	up-down	2.99	3.05	6.5	1.24	1.63	3.03	2.44	9.6	2.72	others
CsaV3_3G022000	89.58	82.11	96.64	195.62	164.69	218.97	83.3	82.99	113.08	0.00110856	0.991953	0.00332625	up-down	229.52	169.38	137.22	228.67	273.54	300.83	246.77	186.39	203.22	up
CsaV3_3G022030	64.3	77.56	87.14	424.55	694.59	396.87	50.37	45.35	59.11	2.86e-18	0.0849461	1.88e-30	up-down	39.54	35.26	35.77	50.13	45.48	65.42	36.59	42.4	31.78	up
CsaV3_3G022730	8.72	10.83	8.38	36.37	44.95	27.34	10.22	12.36	28.03	7.76e-09	0.408579	0.0356227	up-down	8.04	10.73	11.6	1.75	0.9	1.52	4.28	10.26	12.15	down
CsaV3_3G022880	21.57	22.23	27.38	50.81	40.4	50.24	15.47	19.48	22.52	0.00496973	0.605184	6.46e-05	up-down	14.79	16.43	16.12	17.3	21.3	11.38	13.45	12.74	17.56	others
CsaV3_3G023140	153.83	280.94	369.96	714.16	1536.28	891.54	47.2	63.23	75	0.000575588	2.59e-08	1.96e-32	up-down	211.98	171.08	193.98	176.53	221.39	98.46	187.4	117.72	170.12	others
CsaV3_3G023250	28.35	28.16	31.34	52.28	46.29	58.56	36.25	33.5	37.13	0.00776654	0.898901	0.0445876	up-down	27.41	26.69	25	32.77	34.96	51.67	27.81	30.63	33.09	up
CsaV3_3G023620	1.34	0.31	0.22	29.2	14.66	5.44	0.09	0.89	1.22	0.000182816	0.984287	0.000560762	up-down	8.89	9.58	14.28	0.16	0.32	0.12	0.26	1.97	8.37	down
CsaV3_3G025060	6.63	9.5	7.25	56.92	41.03	34.68	5.78	10.77	15.58	3.9e-11	0.819713	1.13e-05	up-down	19.47	11.62	29.42	2.05	3.12	0.77	2.04	10.65	16.25	down
CsaV3_3G026590	14.68	18.01	17.07	37.17	28.28	33.77	17.69	17.01	16.5	0.00658003	0.99448	0.00995809	up-down	21.39	19.8	20.28	20.16	29.25	23.27	21.86	19.15	24.79	others
CsaV3_3G026900	101.17	92.27	83.25	320.97	256.88	157.32	97.46	84.96	110.16	0.00157368	0.954172	0.000354037	up-down	200.26	220.71	260.37	63.12	64.78	64.8	69.2	129.03	289.21	down
CsaV3_3G027270	75.18	114.02	129.32	192.97	286.83	280.35	53.27	80.02	116.01	0.00265715	0.638327	1.35e-05	up-down	62.09	65.19	67.14	22.9	36.72	31.98	61.21	59.52	68.53	down
CsaV3_3G027290	3.66	2.19	1.19	155.98	64.33	24.1	2.44	3.76	2.78	7.84e-13	0.92534	2.91e-16	up-down	79.49	77.05	121.16	2.94	6.11	1.81	0.64	14.06	111.21	down
CsaV3_3G027340	20.46	20.3	20.42	56.74	47.79	42.68	26.04	20.35	24.43	3.13e-05	0.862029	0.00160894	up-down	12.05	18.76	20	13.67	12.32	14.2	11.25	15.53	20.03	others
CsaV3_3G027450	5.67	8.18	6.52	116.05	52.86	33.25	6.21	5.05	9.76	2.9e-10	0.998717	3.84e-11	up-down	97.82	149.26	140.65	3.37	3.2	0.54	3.98	24.25	135.94	down
CsaV3_3G027480	0	1.2	1.7	6.31	18.55	2.77	0	0	0	0.0411216	NA	0.000446906	up-down	0	0.69	0	0	0	0	0	0	0	others
CsaV3_3G027570	7.38	6.93	8.33	17.33	15.66	12.88	7.53	8.32	8.39	0.00635868	0.97021	0.0142281	up-down	8.28	11.19	12.14	5.85	8.75	5.17	5.59	8.16	12.7	others
CsaV3_3G027720	6.07	8.56	12.13	21.41	19.34	24.1	6.36	9.74	12.81	0.0106165	0.979982	0.0199521	up-down	31.47	10.37	17.78	16.07	23.24	8.09	18.49	20.38	14.33	others
CsaV3_3G028000	7.69	5.08	4.4	28.63	24.4	9.85	7.9	7.57	7.77	0.00362101	0.789231	0.0108146	up-down	6.35	4.8	3.23	3.91	4.84	5.48	3.54	3.61	4.58	others
CsaV3_3G028050	2.85	3.93	2.78	46.45	48.71	13.87	2.23	1.24	3.43	7.82e-11	0.759796	4.85e-14	up-down	35.09	39.37	74.82	0.21	0.4	0.48	1.35	10.82	34.8	down
CsaV3_3G028170	31.32	47.41	49.3	105.73	92.94	103.96	43.47	38.44	48.73	0.000655688	0.999669	0.000109912	up-down	29.53	29.33	26.13	51	49.41	36.44	32.15	27.97	39.54	up
CsaV3_3G028570	0.49	1.7	1.12	4.59	5.74	3.95	0.19	0.78	1.02	0.00202525	0.846012	5.94e-05	up-down	1.4	1.43	0.97	1.38	0.52	1.13	1.29	1.91	0.5	others
CsaV3_3G028620	97.62	74.79	70.48	451.41	292.61	382.93	83.67	90.25	87.79	1.02e-10	0.969821	1.16e-13	up-down	115.58	125.26	105.29	209.24	251.66	157.21	86.14	71.73	115.68	up
CsaV3_3G028740	95.54	165.69	150.73	217.01	276.65	292.22	77.43	116.91	158.82	0.0318369	0.862029	0.00538679	up-down	138.35	138.75	161.06	84.37	88.89	79.78	135.23	122.45	134.32	down
CsaV3_3G028760	17.85	17.41	14.77	102.89	51.26	28.52	14.12	15.59	15.69	0.00190172	0.878589	9.06e-05	up-down	39.75	29.77	32.39	17.96	11.62	13.59	8.23	13.8	45.28	down
CsaV3_3G028850	23.34	17.82	14.28	117.37	71.52	51.32	17.01	18.34	15.69	2.1e-05	0.942926	1.24e-07	up-down	38.48	41.81	38.9	31.74	39.74	25.83	11.44	8.89	47.86	others
CsaV3_3G030310	275.16	285.98	317.92	490.12	420.96	635.9	211.03	242.35	315.75	0.0408261	0.649153	0.00124699	up-down	97.96	126.25	110.9	105.86	125.86	128.27	147.88	176.91	147.14	others
CsaV3_3G030450	79.24	120.89	111.63	209.32	255.55	278.23	81.93	112.15	130.21	0.00018715	0.993124	0.000297635	up-down	61.52	66.88	77.39	51.43	44.74	52.97	69.39	67.64	73.47	others
CsaV3_3G030560	8.57	11.7	9.06	19.46	21.83	20.62	13.11	10.98	10.78	0.000238506	0.795984	0.0163584	up-down	13.23	5.45	7.28	19.84	24.48	33.63	6.97	7.41	5.29	up
CsaV3_3G030690	3.15	1.33	0.66	508.17	135.84	79.38	3	4.02	2.76	2.91e-10	0.63281	3.79e-11	up-down	48.94	41.04	68.29	6.92	2.22	2.45	1.56	13.79	103.94	down
CsaV3_3G030830	8.94	16.01	5.68	23.84	49.67	17.48	9.48	11.75	9.54	0.0466754	0.996801	0.0108963	up-down	34.89	22.32	27.31	13.74	34.17	14.55	18.2	21.16	34.44	others
CsaV3_3G030920	9.78	19.43	12.8	454.99	362.77	168.87	9.06	5.93	11.42	2.81e-25	0.427678	4.03e-40	up-down	37.43	57.58	60.83	25.56	10.47	14.39	8.74	17.47	58.49	down
CsaV3_3G031210	0.2	0.03	0.11	4.09	2.37	1.29	0.3	0.26	0.13	8.74e-08	NA	4.25e-07	up-down	0.12	0.33	0	0.06	0	0	0	0	0.16	others
CsaV3_3G031640	0.63	0.69	1.3	40.86	41.63	23.4	2.61	1.76	0	1.08e-07	NA	1.12e-07	up-down	11.09	8.31	10.55	0	0.23	0	0.46	1.72	11.34	down
CsaV3_3G031850	1.05	0.64	0.12	6.09	5.1	4.23	2.19	1.3	0.94	0.000220687	0.660333	0.0112071	up-down	3.55	2.64	4	0.83	1.89	0.25	1.46	3.99	7.88	others
CsaV3_3G032290	21.75	27.28	28.3	69.48	86.48	54.56	27.27	20.53	46.02	0.000285365	0.949353	0.0110594	up-down	33.73	24.48	44.65	17.86	15.03	11.77	9.86	19.66	43.05	down
CsaV3_3G032400	10	14.5	17.6	31.54	26.97	28.03	4.23	6.81	7.17	0.0119469	0.00696145	1.43e-11	up-down	5.17	6.7	5.89	3.63	5.36	3.31	5.95	8.22	6.94	others
CsaV3_3G032540	10.37	14.3	10.9	29.17	25.04	25.39	9.1	8.28	13.61	0.0127325	0.912322	0.00381512	up-down	6.66	9.74	14.62	7.25	4.81	2.6	11.11	20.12	8.26	others
CsaV3_3G032840	8.04	5.61	7.27	47.33	24.03	14.01	3.92	6.54	6.22	0.00128795	0.828353	2.59e-05	up-down	48.5	23.2	37.64	15.52	16.57	15.21	23.29	16.2	47.14	down
CsaV3_3G032850	0.45	0.2	0	43.09	13.07	5.77	0	0.43	0.76	2.22e-09	NA	5.28e-05	up-down	5.02	7.98	13.37	0	0.09	0	0	3.67	12.52	down
CsaV3_3G032970	20.02	22.19	27.15	73.32	55.13	46.37	15.53	23.14	35.16	0.00163398	0.988999	0.0137594	up-down	10.64	14.56	34.3	7.14	2.02	5.11	8.52	29.18	37.06	down
CsaV3_3G033000	32.87	25.96	20.61	955.52	706.3	384.2	15.88	35.66	55.43	8.22e-31	0.850191	3.82e-20	up-down	152.65	60.73	186.93	11.19	4.08	0.52	4.34	51.08	305.51	down
CsaV3_3G033020	22.67	19.35	15.54	84.68	73.1	37.97	13.57	16.86	16.54	0.000118574	0.677187	6.4e-08	up-down	80.34	69.56	77.79	38.04	58.51	29.96	24.67	24.13	64.01	others
CsaV3_3G033260	35.08	28.12	14.5	642.63	211.86	155.86	16.8	40.01	47.85	5.82e-09	0.860358	1.84e-08	up-down	114.12	144.72	241.39	39.81	43.23	20.13	21.24	90.1	183.64	down
CsaV3_3G033300	1.25	1.05	1.26	6.27	5.62	2.17	0.72	0.36	1.68	0.025461	0.936321	0.0118983	up-down	2.85	2.02	1.79	2.43	0.91	0.84	1.03	2.2	3.56	others
CsaV3_3G033350	13.3	14.96	8.47	54.59	55.2	24.07	4.23	7.4	12.9	0.000328334	0.61611	1.33e-06	up-down	63.21	40.03	81.48	4.36	5.39	2.53	3.14	16.71	61.35	down
CsaV3_3G033380	1.01	0.83	0.72	3.61	2.91	1.96	0.96	0.87	0.99	0.00981035	0.983306	0.0131857	up-down	0.96	0.27	0.5	0.09	0.39	0.13	0.49	0.73	0.85	others
CsaV3_3G033470	1.72	2.02	2.88	10.29	4.48	3.5	1.12	2.21	2.49	0.0407709	0.953351	0.0136769	up-down	3.74	3.75	5.81	0.52	0.51	0.38	2.33	3.89	8.13	down
CsaV3_3G033480	8.11	11.54	12.16	30.43	24.97	19.74	10.38	8.67	13.08	0.00159103	0.993124	0.000996755	up-down	6.63	5.45	7.84	2.68	2.02	1.29	3.67	5.94	6.77	down
CsaV3_3G033490	61.76	70.37	87.06	262.42	206.23	193.29	37.55	64.15	93.82	1.47e-07	0.918425	2.08e-05	up-down	54.82	52.37	81.17	16.7	27.13	12.81	50.29	74.03	79.17	down
CsaV3_3G033690	8.56	11.86	8.02	58.56	33.74	25.55	12.52	7.82	6.36	2.29e-05	0.968851	1.04e-05	up-down	5.8	15.84	8.96	11.09	12.13	18.24	18.36	20.08	22.34	others
CsaV3_3G033700	0.88	0.45	0.99	73.94	49.29	33.18	0.87	1.07	1.83	3.1e-27	0.871563	9.49e-29	up-down	25.8	62.64	39.89	4.68	3.56	2.38	1.03	5.58	46.41	down
CsaV3_3G034110	3.72	1.98	1.54	14.1	7.45	5.63	2.45	4.5	1.99	0.00902631	0.942926	0.0180737	up-down	0.27	0.36	1.07	1.3	0.26	0	1.11	0.3	0.35	others
CsaV3_3G034250	3.81	6.56	5.61	17.92	23.46	10.47	4.15	3.04	4.51	0.00065147	0.614827	2.95e-07	up-down	6.25	4.15	7.62	1.28	3.93	2.19	2.83	2.59	8.32	others
CsaV3_3G034280	25.57	25.85	17.94	616.04	448.52	727.57	172.05	106.79	88.23	6.41e-48	2.16e-09	3.16e-09	up-down	22.09	41.59	22.68	54.81	54.17	27.25	10.57	22.03	14.45	others
CsaV3_3G034460	5.38	8.87	4.46	26.48	25.21	14.13	1.69	4.5	1.68	0.0178787	0.604008	0.000159588	up-down	10.93	8.54	10.57	32.41	60.09	17.39	6.98	8.12	11.59	up
CsaV3_3G034470	5.65	4.74	5.27	17.65	14.52	8.96	4.35	6.64	5.36	0.00434767	0.991927	0.00661566	up-down	18.19	9.9	14.58	12.64	13.78	10.6	13.25	12.93	9.84	others
CsaV3_3G034700	3.55	4.83	5.08	15.87	12.53	11.27	4.42	4.42	7.9	1.88e-05	0.859182	0.00494822	up-down	3.32	3.79	8.17	1.05	0.48	0.66	1.02	5.59	7.15	down
CsaV3_3G035020	21.7	19.95	19.92	45.54	54.6	62.55	19.46	30.77	34.14	3e-05	0.631655	0.0411771	up-down	8.37	10.8	4.78	15.9	8.63	8.53	7.99	13.76	2.09	others
CsaV3_3G035690	24.29	9.16	5.12	122.01	94.12	74.68	6.33	37.71	17.52	8.85e-06	0.836654	0.000377817	up-down	32.66	70.86	71.43	68.22	210.34	86.62	137.76	136.96	124.26	up
CsaV3_3G035700	17.94	50.83	42.97	73.4	113.95	110.33	34.94	20.26	56.09	0.013407	0.991953	0.00399078	up-down	44.64	45.23	46.95	35.14	38.79	30.72	48.81	59.72	39.56	others
CsaV3_3G035900	49.48	31.57	36.22	196.04	165.99	146.83	44.11	58.28	40.61	7.14e-10	0.856399	2.8e-09	up-down	38.47	44.53	44.84	60.8	68.12	50.21	27.39	30.84	39.14	up
CsaV3_3G036070	1.49	0.98	1.06	7.66	4.29	2.92	0.47	1.54	1.21	0.0193177	0.979381	0.0150686	up-down	0.44	0.6	0.89	2.95	4.81	4.26	1.3	0.71	2.16	up
CsaV3_3G036190	151.01	103.75	128.66	529.61	145.12	480.8	129.64	172.54	140.26	0.0167455	0.901622	0.0198344	up-down	14.49	19.14	10.54	54.3	38.61	35.92	33.11	35.34	6.83	up
CsaV3_3G036300	22.34	20.48	17.81	66.24	42.95	49.62	13.8	18.86	18.01	0.000294408	0.75084	2.35e-06	up-down	9.46	19.65	29.66	11.02	11.51	10.45	16.13	23.97	19.21	others
CsaV3_3G036340	168.21	179.97	171.61	511.48	413.01	427.1	139.4	156.01	247.49	3.7e-08	0.993124	0.000160703	up-down	171.87	221.04	286.36	79.36	99.37	80.7	190.44	211.31	177.51	down
CsaV3_3G036820	3.21	4.91	4.89	14.21	22.81	17.71	5.01	4.18	5.75	5.03e-09	0.892745	2.59e-08	up-down	6.91	6.49	7.68	4.22	13.35	5.75	8.06	10.98	8.67	others
CsaV3_3G036870	6.75	8.24	6.39	17.77	17.96	13.61	5.41	7.1	5.46	0.00166754	0.8384	0.000161084	up-down	24.7	23.52	21.56	17.88	25.85	13.86	14.23	13.65	27.99	others
CsaV3_3G036900	5.98	7.48	6.58	11.12	14	15.37	3.37	5.1	5.96	0.0304924	0.628066	0.00122955	up-down	15.68	9	7.65	22.83	22.56	16.39	12.29	10.63	10.39	up
CsaV3_3G036910	223.48	141.95	112.27	562.64	404.71	376.97	141.82	172.4	66.53	0.00221969	0.852668	8.73e-05	up-down	287.8	233.52	177.35	513.63	423.23	481.97	157.16	119.98	225.93	up
CsaV3_3G037550	3.67	0	1.17	25.89	36.73	27.72	2.34	6.71	11.94	0.00028671	NA	0.023808	up-down	0.29	0.22	0	4.56	10.44	5.66	25.71	4.68	19.66	up
CsaV3_3G037630	94.32	196.19	139.29	217.36	305.77	303.11	70.77	79.39	118.17	0.0385929	0.215564	1.46e-07	up-down	14.59	38.78	29.74	45.72	54.36	58.93	47.04	46.72	43.65	up
CsaV3_3G037780	0	0.22	0.2	12.81	8.45	4.09	0	0	0.6	2.53e-05	NA	9.92e-06	up-down	8.71	4.62	14.14	0	0.26	0.18	0.13	0.24	4	down
CsaV3_3G037860	24.75	14.66	11.43	68.8	54.03	55.74	10.1	14.82	31.45	0.000201109	0.982596	0.00127455	up-down	33.33	61.26	52.18	14.7	38.28	19.08	6.01	22.92	51.86	others
CsaV3_3G037870	0	0.43	0	13.49	6.53	4.71	0.42	0.69	1.42	4.03e-05	NA	0.00015487	up-down	6.46	17.31	13.23	5.25	1.42	0.53	0.53	3.43	17.65	down
CsaV3_3G037900	76	109.49	90.66	352.23	392.68	368.9	52.92	54.85	101.77	5.49e-11	0.734737	7.84e-12	up-down	80.77	81.85	101.09	74.98	64.89	38.97	57.19	69.74	132.53	others
CsaV3_3G037910	18.89	27.57	19.68	97.1	114.31	96.65	21.67	20.74	23.77	9.11e-15	0.990973	1.21e-17	up-down	48.14	42.37	60.76	50.87	66.38	32.15	24.05	32.55	57.33	others
CsaV3_3G037980	33.02	60.58	46.32	85.44	112.27	99.43	49.01	39.87	51.43	0.01092	0.992636	0.0009631	up-down	43.62	54.75	47.68	74.26	67.4	53.44	49.53	54.22	69.9	up
CsaV3_3G038000	87.31	77.1	83.2	166.51	127.95	138.9	69.93	95.25	82.38	0.00808625	0.899659	0.00459006	up-down	55.95	63.69	51.73	53.37	61.49	36.38	37.46	33.3	50.19	others
CsaV3_3G038210	34.26	47.28	47.72	241.5	240.16	235.92	28.7	27.27	36.49	2.72e-23	0.429247	6.01e-33	up-down	102.13	92.29	87.78	125.92	148.44	73.04	53.26	62.69	95.68	others
CsaV3_3G038240	36.83	34.32	41.54	93.92	60.15	92.37	28.42	37.94	43.07	0.00650953	0.965398	0.00366541	up-down	18.53	20.92	18.43	11.3	18.22	11.71	18.2	15.27	19.18	others
CsaV3_3G038310	112.82	98.93	117.48	205.69	190.72	209.16	35.7	44.83	47.64	0.00671043	6.27e-09	3.01e-20	up-down	9.99	21.11	12.46	23.78	27.57	29.84	23.23	25.2	6.88	up
CsaV3_3G038460	0.81	0.44	0.2	4.12	3.57	1.47	0.63	0.26	0.2	0.00891483	NA	0.00131729	up-down	3.57	3.31	5.94	0	0.08	0.22	0	1.44	12.95	down
CsaV3_3G038520	55	122.32	87.11	153.38	263.87	290.55	45.13	48.7	152.79	0.00541458	0.968734	0.0104476	up-down	10.08	16.21	18.94	29.27	10.59	6.29	23.73	24.62	15.39	others
CsaV3_3G038570	13.87	26.27	19.32	37.86	69.51	40.69	20.73	16.08	22.57	0.0097017	0.990973	0.00207636	up-down	30.9	33	32.25	36.07	44.33	35.71	31.31	45.11	51.42	others
CsaV3_3G038810	36.84	44.42	47.78	85.42	109.56	83.32	58.54	43.13	55.34	0.000300305	0.758936	0.0262518	up-down	41.39	49.67	62.54	32.03	23.08	29.39	37.48	44.93	77.55	others
CsaV3_3G039160	12.51	14.96	14.86	28.04	29.91	25.94	13.79	16.49	13.24	9.45e-05	0.993124	0.00425974	up-down	11.85	13.13	12.44	6.99	7.64	9.36	8.49	8.54	12.51	others
CsaV3_3G039390	2.72	5.04	3.88	9.98	8.77	7.29	4.44	3.96	3.21	0.00877335	0.994401	0.00344959	up-down	3.83	2.77	4.04	2.03	1.54	3.63	1.56	3.29	2.98	others
CsaV3_3G039730	1.91	1.84	1.35	11.2	6.91	3.66	1.69	1.76	1.84	0.000241664	0.996801	3.84e-05	up-down	3.2	2.72	2.28	0.13	0.53	0.6	0.66	0.57	2.93	down
CsaV3_3G039740	62.34	82.75	86.36	173.86	186.49	196.12	109.7	106.83	124.53	4.48e-06	0.132747	0.0359994	up-down	67.99	72.59	99.16	116.41	62.04	88.9	64.17	85.5	109.57	others
CsaV3_3G039860	35.05	68.09	57.47	115.47	131.6	108.43	42.43	45.1	67.72	0.0071701	0.973496	0.00057108	up-down	43.37	38.79	50.01	20.59	24.31	13.39	29.87	41.05	50.19	down
CsaV3_3G039930	87.39	64.63	59.38	173.9	163.6	148.76	46.26	66.01	69.12	0.000803895	0.82438	1.01e-06	up-down	10.33	39.02	17.03	20.41	36.05	27.53	31.49	62.58	1.68	others
CsaV3_3G040050	0.04	0.1	0	1.44	2.04	0.79	0.05	0.04	0.05	0.000131309	NA	6.46e-05	up-down	0.9	0.86	0.48	0	0	0	0.13	0.04	0.29	down
CsaV3_3G040130	28.82	40.31	35.88	71.54	63.13	61.06	23.68	28.36	41.41	0.00902298	0.876754	0.00502945	up-down	57.31	41.25	51.44	28.08	36.25	24.51	25.29	30.35	50.25	others
CsaV3_3G040150	10.25	10.19	9.17	25.75	19.31	18.23	8.81	11.85	11.28	0.00495157	0.9691	0.0172884	up-down	14.66	15.32	18.86	7.41	5.83	7.33	8.27	9.87	17.03	down
CsaV3_3G040160	67.03	102.09	64.8	254.35	244.09	174.69	73.29	25.83	138.87	0.00249422	0.999741	0.0443273	up-down	51.26	37.76	139.22	4	2.79	5.11	9.78	48.69	140.27	down
CsaV3_3G040350	11.58	14.88	12.82	22.25	36.31	18.04	12.01	9.98	10.26	0.0404171	0.737482	0.0016576	up-down	28.38	22.9	22.81	24.06	27.99	20.78	13.58	10.59	21.74	others
CsaV3_3G040550	2036.87	1437.57	1487.52	11955	7790.4	9724.75	1506.74	1656.72	1161.89	1.39e-25	0.8393	7.95e-25	up-down	24649.8	15520.1	17012.2	60145.6	77397	50255.2	27217.5	14850.9	29772.4	up
CsaV3_3G040600	11.03	9.74	9.2	28.94	24.58	22.23	8.78	11.81	10.4	1.86e-05	0.984287	1.97e-05	up-down	18.29	17.86	14.56	21.13	42.15	24.78	18.17	20.86	17.12	up
CsaV3_3G040820	93.38	136.35	88.47	245.49	211.15	191.92	103.56	88.12	92.7	0.012361	0.891755	0.000130323	up-down	86.45	79.38	102.24	41.57	64.35	33.05	80.97	84.11	207.17	others
CsaV3_3G041210	0.64	0.75	0.64	4.06	2.12	1.54	0.3	0.51	0.32	0.00285476	0.556413	1.09e-05	up-down	2.52	2.44	2.77	0.46	1.27	0.99	0.59	0.7	2.05	down
CsaV3_3G041280	6.42	10.39	7.19	13.52	25.3	18.39	3.04	6.34	10.9	0.0262468	0.923356	0.0204	up-down	15.32	9.81	19.37	7.04	18.89	2.4	15.1	6.09	38.02	others
CsaV3_3G041300	0.47	0.27	0	43.25	10.7	4.46	1.04	0.88	0	4.92e-06	NA	5.04e-06	up-down	3.09	8.74	8.83	1.09	0	0.2	0.15	1.83	22.45	down
CsaV3_3G041800	1.15	1.95	1.29	228.45	242.87	88.81	2.79	2.38	2.93	5.44e-54	0.352738	3.16e-56	up-down	8.86	2.93	9.31	4.99	0.4	0.32	0.06	0.49	7.07	others
CsaV3_3G041810	0	0	0	4.69	1.72	0.85	0	0	0	5.86e-06	NA	2.13e-06	up-down	0	0	0.21	0	0	0	0	0	0.39	others
CsaV3_3G041820	4.67	3.21	4.71	660.87	256.96	125.42	2.87	6.62	5.07	1.91e-28	0.949579	2.66e-13	up-down	78.78	32	147.88	5.78	1.8	1.6	1.54	11.1	171.67	down
CsaV3_3G041940	105.03	167.57	166.7	229.81	274.82	335.76	112.79	99.53	198.08	0.038157	0.94549	0.0215505	up-down	60.81	76.27	98.61	52.94	43.89	43.33	81.44	98.58	67.63	others
CsaV3_3G042030	5.38	11.57	6.74	241.94	197.53	180.65	6.86	8.34	8.79	9.98e-41	0.99907	9.79e-54	up-down	17.78	25.44	26.88	36.81	65.23	10.32	2.28	6.95	22.22	others
CsaV3_3G042050	17.71	26.69	21.92	51.23	54.02	35.27	21.12	19.4	21.23	0.00652314	0.919062	0.000332125	up-down	31.17	21.04	33.6	14.33	15.72	14.22	13.42	16.28	36.79	down
CsaV3_3G042210	4.7	3.2	1.89	28.37	12.41	7.88	1.58	2.48	3.63	0.00198358	0.888858	2.42e-05	up-down	9.72	7.23	19.19	6.67	4.59	3.76	5.47	3.92	20.37	others
CsaV3_3G042240	1.41	2.15	1.88	7.93	10.11	4.58	1.21	1.23	1.68	9.18e-07	0.569156	1.52e-10	up-down	2.19	1.92	2.61	0.81	1.23	0.72	0.76	0.46	2.31	others
CsaV3_3G042290	23.16	37.72	35.49	84.45	96.05	64.84	33.77	28.68	36.3	0.000394052	0.997319	4.88e-05	up-down	112.15	86.73	93.85	73.86	97.84	75.25	50.79	44.95	103.5	others
CsaV3_3G042420	59.41	41.2	33.17	232.01	244.94	128.29	19.73	50.83	49.03	8.85e-07	0.938987	2.8e-07	up-down	112.57	185.25	308.28	67.31	97.5	48.3	144.15	442.35	165.2	down
CsaV3_3G042470	16.51	12.36	9.3	23.97	28.02	30.73	4.23	9.92	14.41	0.0406559	0.819121	0.00650923	up-down	12.59	12.51	17.96	11.59	10.13	5.44	22.03	28.3	19.49	others
CsaV3_3G042730	3.65	3.59	4.49	8.49	8.65	6.16	3.84	3.99	3.82	0.0117962	0.980771	0.00594881	up-down	2.84	2.19	1.88	2.11	2.41	2.85	0.81	1.66	3.35	others
CsaV3_3G042870	15.6	39.78	24.44	45.36	84.24	45.12	18.41	13.75	20.79	0.0302367	0.531299	2.49e-06	up-down	18.56	24.6	21.45	11.74	17.13	20.37	17.73	19.65	33.69	others
CsaV3_3G043060	79.55	66.91	49.74	155.59	132.16	102.21	41.8	54.03	46.38	0.0460828	0.436188	5.6e-06	up-down	24.69	49.58	51.14	38.26	56.49	37.7	41.48	54.35	64.74	others
CsaV3_3G043320	37.25	37.71	40.12	64.99	62.77	67.03	28.46	39.81	35.28	0.0211619	0.859182	0.0128567	up-down	35.75	37.91	28.32	55.79	59.8	45.64	48.78	36.91	46.52	up
CsaV3_3G044040	35.3	52.63	48.42	102.98	90	90.95	44.06	38.65	49.31	0.00165425	0.96633	0.000169271	up-down	70.42	86	90.95	72.57	63.69	71.06	73.33	90.71	99.59	others
CsaV3_3G044180	0.64	0.25	0.27	7.26	5.66	2.5	0.76	1.03	0.81	5.25e-08	0.500759	3.99e-06	up-down	1.11	0.23	0.46	0	0.32	0	0.04	0.07	0.72	others
CsaV3_3G044190	4.97	2.44	1	113.82	84.67	33.59	2.7	4.49	5.42	4.79e-13	0.854204	4.53e-19	up-down	74.03	38.09	91.91	3.46	0.12	0.32	1.43	15.42	157.44	down
CsaV3_3G044520	0	3.18	1.2	19.45	14.4	17.55	1.81	3.78	3.63	0.000585529	NA	0.00288653	up-down	27.06	19.66	30.14	5.28	1.77	1.52	1.12	5.01	41.4	down
CsaV3_3G044540	23.66	31.39	13.1	70.78	108.81	59.9	6.71	7.43	11.04	0.000361117	0.00816173	1.94e-20	up-down	103.79	88.11	128.91	311.65	346.14	243.59	154.61	91.28	149.73	up
CsaV3_3G044690	0.48	0	0.2	10.71	4.07	1.64	0.35	0.17	0.2	3.37e-05	NA	3.45e-07	up-down	16.92	49.07	62.65	1.18	1.28	0.24	0.18	1.76	32.17	down
CsaV3_3G044710	2.76	1.92	1.07	6.53	5.94	6.04	1.39	1.67	2.41	0.00643817	0.975131	0.000302073	up-down	0.13	0.58	0.67	2.78	3.2	5.56	1.72	7.59	3.1	up
CsaV3_3G044850	4.94	5.42	3.58	36.82	14.49	9.54	5.78	4.39	4.48	0.00927712	0.993124	0.00635309	up-down	36.42	45.49	35.56	3.87	3.07	0.89	5.09	6.57	95.26	down
CsaV3_3G044870	3.34	4.3	3.03	24.7	18.85	11.23	4.11	4.39	6.4	2.41e-06	0.779836	0.000132656	up-down	7.31	7.78	16.81	1.35	0.82	0.13	0.28	4.23	10.97	down
CsaV3_3G044920	7.66	8.18	10.76	18.73	15.82	19.75	5.97	8.73	7.67	0.000604399	0.94549	0.000241585	up-down	2.06	5.03	5.99	2.71	1.52	3.59	4.32	11.43	4.26	others
CsaV3_3G045110	19.98	22.9	23.51	40.17	34.81	34.78	21.34	18.42	24.02	0.0464731	0.942926	0.0275837	up-down	18.83	19.69	16.91	7.58	13.04	11.19	15.38	18.03	23.69	others
CsaV3_3G045130	40.95	40.86	41.86	79.11	106.97	66.77	36.52	34.65	39.43	0.00559536	0.775595	0.00025837	up-down	63.68	65.53	68.96	18.21	32.94	31.37	32.64	34.36	68.98	down
CsaV3_3G045140	25.6	19.35	27.11	63.91	49.44	37.92	18.42	22.48	23.4	0.0209037	0.855146	0.000656194	up-down	16.19	19.37	20.14	8.56	12.17	7.95	7.61	8.12	21.46	down
CsaV3_3G045340	10.8	20.09	16.35	31.73	55.34	32.56	16.13	12.07	15.81	5.08e-07	0.979989	7.19e-06	up-down	5.72	4.12	4.67	3.68	4.26	2.92	4.61	4.29	6.12	others
CsaV3_3G045530	20.56	19.18	19.91	43.15	40.13	39.68	15.3	12	19.87	0.00719821	0.737575	0.000575062	up-down	52.76	59.32	38.14	26.72	51.35	52.41	32.89	44.44	46.2	others
CsaV3_3G045750	0	0.58	1.35	3.71	10.47	8.87	1.37	0.93	2.16	0.00183709	NA	0.0100851	up-down	0.48	1.34	0	0.28	0.46	0	0.47	0.29	1.44	others
CsaV3_3G045960	4.97	2.93	3.57	13.92	8.55	7	3.57	4.55	3.24	0.0192634	0.96564	0.00168167	up-down	11.59	6.81	4.94	6.24	8.93	9.41	9.3	7.47	5.46	others
CsaV3_3G046000	50.66	57.57	67.13	136.07	120.33	159.61	38.07	55.22	55.69	6.88e-05	0.767428	6.37e-06	up-down	44.5	46.74	45.78	39.97	64.79	39.26	42.24	48.59	44.79	others
CsaV3_3G046050	18.23	6.15	4.83	236.04	100.07	47.44	30.21	28.13	16.22	1.07e-06	0.190539	8.97e-05	up-down	36.06	35.57	37.37	6.84	8.03	9.49	2.72	13.06	69.08	down
CsaV3_3G046070	185.78	412.33	344.69	521.93	957.72	695.35	395.88	282.37	419.18	0.0230612	0.914168	0.0201425	up-down	464.85	534.88	670.01	558.62	397.76	588.13	575.96	585.98	631.3	others
CsaV3_3G046110	6.2	11.59	8.44	21.62	28.14	19.77	15.15	10.47	10.32	0.00018654	0.632559	0.0297705	up-down	4.26	8.25	6.26	9.6	6.74	7.56	8.75	6.48	9.01	others
CsaV3_3G046320	65.02	83.6	61.25	173.45	162.3	165.92	109.3	64.65	80.66	0.000236732	0.869402	0.0305758	up-down	49.64	38.87	59.85	44.39	40.98	51.77	46.56	60.7	50.87	others
CsaV3_3G046410	1.75	2.29	2.25	8.77	6.21	6.73	1.97	2.28	1.53	4.87e-06	0.957174	5.51e-06	up-down	0.55	0.91	0.81	0.28	0.88	0.16	0.31	0.11	0.57	others
CsaV3_3G046860	8.74	7.11	9.53	18.28	18.09	16.35	8.24	10.91	8.93	0.00164289	0.943929	0.0113114	up-down	9.56	11.21	8.59	7.7	12.12	11.81	7.85	8.71	9.6	others
CsaV3_3G047020	4.94	8.05	5.85	18.24	18.22	12.5	5.28	3.51	10.37	0.000772944	0.9906	0.00908183	up-down	32.04	23.84	26.31	5.94	8.1	6.5	3.13	5.42	38.52	down
CsaV3_3G047030	0.21	0.52	0	5.05	6.15	2.09	0.25	0.27	0.88	1.25e-05	NA	3.95e-05	up-down	2.91	4.67	5.82	0	0.47	0	0.14	2.52	7.02	down
CsaV3_3G047040	1.5	2.13	2.22	11.54	9.37	3.96	2.58	1.59	2.83	0.00102852	0.942926	0.00325176	up-down	18.26	20.33	34.91	1.26	2.43	1.57	2.4	5.9	26.89	down
CsaV3_3G047430	60.35	65.39	73.24	140.16	121.18	155.25	48.73	66.3	100.91	0.000818548	0.972567	0.0399549	up-down	115.59	163.78	180.03	91.46	98.31	106.22	101.07	133.31	184.24	others
CsaV3_3G047490	152.15	151.74	188.03	260.96	263.71	325.91	89.01	130.89	138.29	0.0472069	0.170078	1.46e-05	up-down	41.97	56.2	56.51	58.47	74.63	59.75	74.27	81.52	37.74	others
CsaV3_3G047570	4.34	4.23	3.08	13.39	19.62	6.53	4.28	2.96	3.37	0.00413457	0.942926	0.000445645	up-down	2.61	14.54	8.19	0.71	1.42	0.09	2.94	4.99	2.52	down
CsaV3_3G047630	96.37	103.99	133.86	263.14	222.31	291	93.12	145.3	188.61	2.25e-05	0.814167	0.0119339	up-down	100.45	117.52	102.4	117.65	143	123.31	107.38	111.4	119.68	others
CsaV3_3G047680	0.78	1.24	0.58	7.33	7.79	3.64	0.15	0.61	0.72	0.000199442	NA	1.26e-05	up-down	32.99	25.01	55.33	0.96	1.14	0.14	0.32	4.51	58.39	down
CsaV3_3G048040	22.8	15.6	17.78	53.55	43.06	51.3	16	23.31	19.69	0.00018744	0.990973	8.11e-05	up-down	4.33	3.42	4.84	3.61	6.16	3.3	2	2.08	5.66	others
CsaV3_3G048210	26.19	42.35	37.86	52	76.45	77.05	23.52	23.06	39.33	0.0362257	0.741849	0.00155064	up-down	30.36	23.55	29.59	31.29	31.33	28.46	20.8	22.38	37.6	others
CsaV3_3G048320	9.74	8.95	8.97	45.57	36.1	28.46	6.02	9.09	8.63	3.25e-10	0.819008	2.5e-11	up-down	11.94	7.46	11.29	7.58	10.5	7.06	4.25	7.54	12.14	others
CsaV3_3G048370	13.2	24.74	19.94	41.92	64.56	54.41	8.39	8.72	7.7	0.00252417	0.00495064	9.74e-18	up-down	17.64	16.81	14.85	13.36	18.52	13.93	30.64	30.09	26.8	others
CsaV3_3G048830	2.94	1.91	0.47	14.12	6.95	5.14	1.09	2.79	2.6	0.0125559	0.9691	0.00488134	up-down	6.81	10.5	14.76	1.16	7.09	0.99	2.28	4.33	10.91	others
CsaV3_3G048860	122.51	138.19	129.97	285.58	295.38	255.6	122.89	124.86	143.03	4.79e-06	0.94407	8.75e-06	up-down	201.29	181.71	189.28	152.88	171	186.54	162.13	175.76	166.84	others
CsaV3_3G049040	1.48	4.36	2.99	8.33	8.64	12.89	1.47	3.21	3.09	0.00597204	0.966661	0.000762017	up-down	0.94	1.65	1.93	4.16	3.61	4.22	5.05	3.76	0.97	up
CsaV3_3G049080	138.49	153.36	126.39	327.55	334.41	264.4	73.54	99.04	150.2	6.57e-05	0.628066	2.78e-05	up-down	165.91	182.62	286.11	157.21	186.16	110.62	138.24	137.13	260.43	others
CsaV3_3G049360	0.11	0.13	0	5.21	3.85	2.19	0.24	0.3	0.36	0.000106416	NA	0.000106628	up-down	0.28	0.43	0	0	0.36	0	0	0	0.24	others
CsaV3_3G049440	14.48	13.9	11.56	43.45	43.9	32.59	9.2	8.97	6.53	2.08e-05	0.369759	1.54e-09	up-down	0	0	0	0	0	0	0	0	0	others
CsaV3_3G049580	5.36	5.04	6.19	20.48	13.5	16.05	8.22	8.06	7.44	2.63e-07	0.605854	0.000581117	up-down	3.47	2.45	3.7	6.86	4.68	3.63	2.6	2.75	4.39	others
CsaV3_3G049680	17.25	19.3	21.21	51.02	55.51	53.93	16.18	18.28	17.3	3.63e-09	0.790664	9.33e-09	up-down	5.86	4.72	3.68	4.4	8.71	6.46	3.21	3.98	4.09	others
CsaV3_3G049710	14.42	22	15.95	45.14	47.53	36.82	15.57	12.74	14.99	0.000224265	0.765169	1.54e-07	up-down	31.41	31.18	34.19	14	19.47	14.89	14.84	13.32	43.67	down
CsaV3_3G049880	52	61.19	59.31	129.95	121.56	108.8	52.66	56.49	81.03	0.00018744	0.947277	0.0135441	up-down	58.09	60.13	76.04	74.1	66.93	70.42	75.95	83.42	60.22	others
CsaV3_3G049980	1.24	1.84	1.04	8.96	4.22	3.86	1.6	1.98	1.11	0.00245901	0.967129	0.00524746	up-down	1.36	0.84	0.81	0.46	0.31	0	0	0.18	0.59	others
CsaV3_4G000150	0.3	0.3	0.35	3.34	3.26	2.74	0.29	0.69	0.34	1.76e-06	0.939519	7.24e-05	up-down	0.86	0.66	0.6	0	0.24	0.08	0.18	0.5	0.64	others
CsaV3_4G000310	2.22	0	0	43.71	51.02	27.99	0	6.06	6.21	0.000566555	NA	0.00396597	up-down	48.35	189.86	133.8	0	7.28	3.04	32.5	102.04	313.54	down
CsaV3_4G000770	3.23	5.92	3.08	11.64	15.61	8.51	3.29	3	3.38	0.000637997	0.827792	3.74e-07	up-down	17.54	8.68	6.26	13.23	16.13	10.36	9.52	7.75	11.71	others
CsaV3_4G000930	7.76	2.02	3.76	114.32	34.46	27.56	2.89	6.67	3.74	1.05e-06	0.990322	1.08e-09	up-down	6.74	18.44	13.42	5.07	11.98	7.15	2.4	4.46	3.58	others
CsaV3_4G000940	9.44	17.39	11.93	35.14	31.6	30.88	10.37	14.05	18.73	0.00167876	0.954375	0.00257881	up-down	10.17	21.08	26.54	2.73	5.83	8.15	7.14	19.06	21.34	down
CsaV3_4G000990	4.22	7.4	4.88	27.04	26.59	12.51	3.79	5.27	5.87	0.000301411	0.955702	2.5e-05	up-down	13.84	6.94	6.82	6.55	11.36	1.73	3.03	5.86	6.82	others
CsaV3_4G001040	1.03	0.46	0.66	5.9	2.91	1.48	0.39	0.52	0.34	0.00189553	0.654016	1.43e-06	up-down	0.1	0.13	0.03	0	0.06	0.13	0	0.15	0.35	others
CsaV3_4G001080	13.05	8.66	14.26	56.12	52.37	30.57	15.67	16.86	20.67	5.62e-05	0.629242	0.00257403	up-down	12.15	10.42	20.57	7.18	13.87	3.43	7.77	15.03	17.88	others
CsaV3_4G001540	36.22	25.06	20.85	83.78	97.01	40.05	28.19	11.17	28.32	0.0294463	0.920783	0.00965186	up-down	40.15	57.35	50.12	12.15	22.62	27.18	38.09	60.14	21.94	down
CsaV3_4G001730	31.77	39.52	35.92	91.59	84.07	65.01	36.59	35.11	48.84	0.000241664	0.979381	0.000501582	up-down	31.95	38.2	63.34	17.63	18.8	19.31	29.27	42.19	48.92	down
CsaV3_4G001980	36.05	32.84	35.03	75.94	70.58	66.04	36.76	30.81	41.65	0.00129195	0.988655	0.0056037	up-down	46.27	41	52.04	48.35	56.74	38.22	46.25	43.23	52.41	others
CsaV3_4G002420	61.64	53.13	45.96	233.31	234.68	114.14	40.65	50.08	50.7	1.48e-05	0.825389	2.31e-08	up-down	121.06	123.83	192.8	55.98	53.96	36.47	28.76	74.13	251.78	down
CsaV3_4G002430	8.55	6.77	7.09	15.71	13.59	14.32	5.87	8.92	8.59	0.0254822	0.993124	0.0480951	up-down	11.35	8.23	7.64	4.53	8.89	9.09	8.55	7.6	8.55	others
CsaV3_4G002510	0.48	0.52	0.41	5.17	3.37	1.26	0.42	0.69	0.21	0.00111957	0.989977	0.0010192	up-down	6.27	19.2	12.08	0.76	0.88	0	0.24	0.89	8.62	down
CsaV3_4G002800	7.5	10.23	9.21	37.86	38.67	36.91	7.31	8.43	8.03	1.56e-06	0.945947	4.19e-07	up-down	30.43	27.15	28.42	28.51	43.08	28.44	28.25	31.92	67.46	others
CsaV3_4G002900	6.48	5.99	3.82	13.68	20.59	10.15	4.34	4.76	6.47	0.0128159	0.969165	0.00214468	up-down	16.66	11.27	8.88	13.42	23.08	9.9	5.68	8.42	18.14	others
CsaV3_4G002910	22.38	26.62	30.3	43.51	55.38	57.19	21.69	22.01	30.52	0.0144141	0.942492	0.00556904	up-down	23.24	24.21	29.53	26.97	32.02	16.84	30.13	28.98	34.63	others
CsaV3_4G003030	1.56	0.39	0.24	19.22	8.22	5.97	0	0.5	0.12	4.93e-07	NA	2.79e-08	up-down	14.92	26.31	41.11	1.07	1.16	1	1.18	6.03	17.03	down
CsaV3_4G003290	9.66	16.84	15.87	46.65	32.25	22.59	5.46	9.4	10.34	0.040427	0.406244	1.87e-05	up-down	37.2	36.43	37.32	24.33	25.62	21.58	24.42	31.14	39.64	others
CsaV3_4G003350	83.9	106.99	99.82	175.11	188.94	226.05	83.16	104.69	130.04	0.00150957	0.951028	0.0217223	up-down	69.46	69.62	80.45	129.94	86.77	91.3	84.64	79.58	96.96	up
CsaV3_4G003570	9.25	8.35	9.78	14.92	18.8	16.06	8.14	8.09	9.73	0.0182246	0.922148	0.00689501	up-down	5.22	5.18	6.79	7.03	4.86	8.04	5.95	4.47	8.12	others
CsaV3_4G003590	44.32	52.34	58.2	126.96	84.95	85.25	49.94	54.18	54.12	0.038212	0.999171	0.0305363	up-down	60.71	53	61.22	60.14	59.45	50.68	46.74	39.87	84.78	others
CsaV3_4G003720	11.04	18.76	19.21	28.36	48.29	28.76	13.06	16.14	18.25	0.0223721	0.97194	0.0035371	up-down	17.41	90.49	41.78	3.4	8.82	2.8	13.83	23.39	20.92	down
CsaV3_4G003860	9.99	10.37	6.44	40.63	30.89	21.93	10.26	11.59	9.72	9.97e-05	0.912013	0.000135937	up-down	20.34	17.11	21.45	13.74	11.59	7.96	9.28	14.69	12.2	others
CsaV3_4G003890	3.89	0	0	48	30.18	10.6	1.76	1.77	3.65	0.00937427	NA	0.00928518	up-down	15.32	30.06	71.35	10.18	10.75	0	0.31	22.65	73.8	others
CsaV3_4G003910	3	11.2	6.28	27.62	48.55	13.62	3.78	14.08	7.56	6.83e-05	0.993874	7.79e-06	up-down	38.31	30.21	90.76	5.43	1.84	1.01	3.37	19.87	80.1	down
CsaV3_4G004150	15.58	21.55	22.14	82.92	79.66	36.96	22.83	16.07	22.37	0.000228103	0.994605	0.000110646	up-down	65.01	52.99	70.54	11.3	10.3	7.22	12.36	32.94	127.75	down
CsaV3_4G004430	1.68	1.13	0.53	13.77	9.38	6.09	0.76	0.71	2.73	2.86e-06	0.9691	3.06e-05	up-down	6.07	1.57	6.72	0	0.66	0	0.33	1.87	0.67	down
CsaV3_4G004890	7.71	14	10.58	17.64	32.66	20.5	8.23	9.19	11.17	0.0294023	0.908991	0.00172695	up-down	3.19	0.98	1.14	1.29	1.93	0.12	0.36	0.41	0.47	others
CsaV3_4G005120	0.32	0.37	0.15	9.66	6.89	1.89	0.27	0.18	0.58	2.63e-07	NA	1.97e-07	up-down	9.61	6.79	11.02	0.26	0	0.19	0.22	0.67	19.05	down
CsaV3_4G005190	14.34	17.89	16.59	49.92	38.61	29.56	20.86	15.84	19.87	0.000636836	0.86577	0.00508536	up-down	10.99	20.81	23.02	5.97	7.72	3.82	11.85	19.26	26.46	down
CsaV3_4G005320	6.51	2.7	3.04	20.7	9.28	9.31	3.66	7.19	4.78	0.0216661	0.907764	0.0309937	up-down	10.44	11.06	9.24	6.42	6.6	6.58	2.22	4.79	12.05	others
CsaV3_4G005460	5.26	0	0.71	111.62	127.14	36.73	0.36	0.62	0.71	0.00146304	NA	1.29e-17	up-down	0.37	0.14	0.49	8.43	34.85	4.11	0.54	0	0	up
CsaV3_4G005640	2.95	5.09	5.03	56.8	22.86	14.13	4.56	5.33	5.58	1.54e-05	0.932326	9.7e-06	up-down	4.93	6.23	7.57	3.8	2.16	0.14	1.36	3.22	12.1	others
CsaV3_4G005820	12.15	14	11.94	22.64	35.87	23.03	13.9	13.72	14.58	0.00581035	0.919062	0.0169724	up-down	3.73	5.54	2.84	1.39	2.08	6.02	4.52	10.04	3.7	others
CsaV3_4G005830	40.9	30.45	25.65	77.91	62.31	50.38	31.57	36.91	39.82	0.00430317	0.95966	0.00977788	up-down	45.09	38.15	36.07	35.98	35.27	37.81	32.76	28.54	59.92	others
CsaV3_4G005930	7.3	11.77	8.42	24.88	35.67	17.09	9.31	6.15	9.68	0.00169312	0.775609	6.15e-06	up-down	20.48	29.17	31.92	6.21	5.33	6.46	9.75	11.58	26.24	down
CsaV3_4G005940	22.15	33.85	24.89	47.64	52.85	52.58	12.96	27.05	23.83	0.022065	0.786807	0.00472553	up-down	37.51	33.05	45.88	45.48	50.17	29.56	31.56	42.37	67.98	others
CsaV3_4G006200	19.65	19.52	16.77	53.34	62.51	38.59	19.45	21.68	23.75	2.51e-05	0.862736	0.000226801	up-down	22.94	22.19	27.79	8.53	10.68	15	11.58	21.21	39.97	down
CsaV3_4G006270	0.19	0.09	0.04	3.31	1.06	0.79	0	0.07	0.17	0.000325879	NA	6.97e-05	up-down	0.04	0.28	0.11	0	0	0	0	0	0.16	others
CsaV3_4G006480	2.86	4.34	2.31	31.18	19.17	12.56	1.66	3.39	9.53	4.71e-07	0.845448	0.00270675	up-down	15	13.86	21.51	0	1.32	0	0.72	5.82	38.13	down
CsaV3_4G006560	25.37	21.82	17.4	40.65	45.57	36.92	20.75	25.31	21.22	0.0308743	0.992682	0.0153441	up-down	12.27	14.63	12.38	11.87	11.85	15.24	7.42	9.81	32.63	others
CsaV3_4G006640	236.22	241.81	252.5	488.72	465.02	372.2	202.62	224.72	219.72	0.006497	0.72725	0.000376649	up-down	666.34	553	581.17	425.17	507.67	595.08	599.31	789.64	566.83	others
CsaV3_4G006830	76.05	68.45	67.87	338.54	242.84	281.66	76.88	89.2	78.33	4.23e-13	0.862029	1.17e-10	up-down	152.97	142.69	126.98	307.95	318.83	250.38	84.28	83.56	147.38	up
CsaV3_4G007310	22.47	23.35	25.49	46.97	44.21	36.11	22.06	25.31	24.47	0.0153024	0.9906	0.02012	up-down	23.59	17.87	16.05	7.35	10.77	10.32	9.92	10.95	20.39	down
CsaV3_4G007370	42.62	30.85	24.31	86.78	76.4	51.24	23.47	41.32	28.39	0.0357448	0.968734	0.00827525	up-down	23.08	35.67	42.69	5.91	11.23	9.66	10.47	24.38	28.39	down
CsaV3_4G007390	40.01	40.96	47.32	83.2	61.02	81.99	27.38	41.06	38.18	0.0407875	0.682632	0.00313295	up-down	22.59	22.52	33.43	17.14	21.97	12.67	16.82	22.85	27.41	others
CsaV3_4G007550	22.72	25.79	22.63	97.35	70.16	59.27	26.49	26.46	33.21	5.9e-07	0.734737	3.6e-05	up-down	54.96	43.52	57.33	28.17	27.06	26.96	23.32	30.94	64.88	down
CsaV3_4G007680	1.06	1.98	1.36	7.5	7.14	2.39	0.91	1.14	2.71	0.00925498	0.9906	0.0175977	up-down	0.07	0.58	0.06	0	0	0	0.27	0	0	others
CsaV3_4G007700	64.07	72.87	54.47	165.36	141.36	150.3	50.93	91.62	96.29	5.26e-05	0.831554	0.0396759	up-down	32.12	52.47	87.2	25.83	38.34	27.52	101.39	129.04	70.67	others
CsaV3_4G007890	244.12	665.49	541.61	772.95	1410.27	1259.47	456.09	318.31	659.27	0.0202141	0.997752	0.00310053	up-down	372.19	419.5	585.66	443.16	255.49	224.95	432.89	488.18	469.58	others
CsaV3_4G008280	15.74	17.59	17.03	36.32	43.56	32.31	17.28	17.7	17.23	2.24e-05	0.990973	9.16e-05	up-down	6.19	10.59	6.01	3.36	3.92	6.39	5.04	10.06	7.75	others
CsaV3_4G008490	2.78	4.09	4.08	12.67	9.43	13.24	4.18	4.13	4.47	0.000725018	0.942926	0.00330197	up-down	7.52	6.71	8.57	1.28	2.58	1.77	3.73	7.12	9.77	down
CsaV3_4G008800	193.52	173.1	172.35	559.23	495.52	322.82	160.62	221.83	244.73	2.9e-06	0.919174	4.21e-05	up-down	340.43	400.27	579.04	350	307.52	264.77	253.66	396.66	560.97	others
CsaV3_4G009030	8.07	6.57	7.46	17.11	13.78	11.92	6.1	7.82	7.3	0.0246332	0.951028	0.00720639	up-down	6.91	5.28	6.11	4.74	4.41	5.03	4.83	6.4	6.57	others
CsaV3_4G009120	50.82	39.23	21.55	112.17	107.63	87.89	16.48	23.76	26.28	0.00442626	0.30498	4.06e-14	up-down	62.37	104.03	150.54	9.88	19.32	15.62	48.21	126.8	103.32	down
CsaV3_4G009200	7.31	2.36	2	16.41	12.18	15.44	7.13	7.64	3.32	8.95e-05	0.727428	0.000294068	up-down	1.63	1.95	0.64	6.49	2.94	2.69	0.1	0.83	0.79	up
CsaV3_4G009310	41.8	33.07	36	99.46	73.89	62.54	33.83	40.14	43.72	0.0105615	0.980046	0.00855543	up-down	33.36	32.48	32.67	17.3	27.61	20.12	19.3	21.71	35.88	others
CsaV3_4G009450	93.51	107.93	102.1	733.62	707.11	713.9	77.56	83.52	91.81	8.98e-57	0.525041	3.54e-53	up-down	171.34	159.48	214.44	151.29	104.97	54.85	60.8	98.31	171.69	others
CsaV3_4G009460	36.62	46.11	34.26	171.72	108.2	87.89	40.37	35.28	48.22	9.95e-05	0.980771	6.11e-05	up-down	83.81	83.2	88.07	39.45	60.29	35.6	37.64	40	112.95	others
CsaV3_4G009510	69.9	40.77	37.87	365.89	173.14	110.23	8.46	17.53	19.85	0.000546381	0.000850841	4.97e-15	up-down	31.29	24.77	57.65	35.08	55.3	15.05	29.98	28.17	40.49	others
CsaV3_4G009710	94.09	74.54	99.32	219.14	151.23	182.65	83.94	79.52	105.57	0.0100198	0.990973	0.00712738	up-down	113.3	109.27	139.78	116.61	93.14	100.82	96.23	125.19	170.89	others
CsaV3_4G010180	2.29	4.41	3.77	16.32	15.06	6.69	2.06	2.24	1.33	0.00137465	0.404981	1.64e-07	up-down	12.35	7.98	12.58	3.8	7.28	12.27	5.59	7.15	12.61	others
CsaV3_4G010240	3.55	4.99	4.11	25.18	15.65	12.98	6.1	5.9	6.42	3.18e-07	0.338992	9.97e-05	up-down	7.69	10.36	16.27	0.71	1.16	0.77	1.93	5.57	17.52	down
CsaV3_4G011640	31.64	38.47	34.26	75.83	91.55	66.74	31.86	39.38	47.43	9.13e-05	0.903332	0.00706556	up-down	79.52	53.98	76.98	88.78	107.62	100.11	61.67	65.9	79.15	up
CsaV3_4G011670	6.02	16.21	8.65	28.4	37.14	31.51	9.65	10.37	12.15	0.00215043	0.991953	2.46e-05	up-down	16.35	19.48	29.47	19.39	20.3	7.84	30.31	20.75	30.65	others
CsaV3_4G011780	21.16	35.64	41.24	56.54	83.62	66.94	19.38	17.55	32.03	0.026534	0.578329	3.16e-05	up-down	27.29	28.54	38.15	20.3	15.13	10.69	19.55	18.28	37.19	others
CsaV3_4G011890	38.48	42.67	40.05	75.56	69.83	57.06	35.15	34.36	42.43	0.0410362	0.823299	0.00531174	up-down	47.26	54.18	62.73	11.09	19.99	12.85	17.3	26.64	43.08	down
CsaV3_4G011930	21.07	28.34	27.35	57.3	60.11	54.22	30.72	28.68	26.67	3.83e-05	0.90961	0.00125153	up-down	25.08	30.37	29.31	21.1	20.1	33.15	31.49	36.43	36.65	others
CsaV3_4G011970	46.67	45.96	39.5	101.76	71.82	78.43	46.06	42.89	43.16	0.0231648	0.981326	0.00971342	up-down	76.9	82.43	80.69	95.29	106.72	81.53	62.91	66.57	88.24	others
CsaV3_4G012200	30.07	34.03	35.85	66.9	62.51	55.89	35.58	36.56	33.11	0.00182011	0.976179	0.0127221	up-down	10.25	9.37	9.09	8.64	12.7	13.74	7.74	9.7	12.78	others
CsaV3_4G013420	2.04	1.64	0.38	15.2	9.21	7	1.18	1.72	0.63	8.5e-05	0.97027	7.44e-07	up-down	16.63	9.72	17.24	1.22	2.93	1.17	1.25	4.21	39.22	down
CsaV3_4G014960	60.33	60.61	55.33	129.26	132.73	112.04	65.55	69.75	60.31	8.41e-07	0.903332	0.00013283	up-down	11.32	18.68	8.48	20.19	8.84	24.68	6.33	17.05	7.83	others
CsaV3_4G022010	7.08	6.22	5.84	209.09	231.93	122.92	3.07	9.25	13.19	3.88e-54	0.86999	2.14e-21	up-down	50.39	21.73	41.14	6.65	7.75	5.96	5.18	10.56	64.67	down
CsaV3_4G023210	72.32	131.72	121.74	184.59	244.92	282.37	53.89	88.51	125.02	0.0123364	0.836755	0.00113773	up-down	106.66	113.75	155.07	66.8	74.02	31.52	78.26	102.05	131.03	others
CsaV3_4G023250	2.13	2.71	1.46	6.19	8.31	6.28	1.23	1.46	2.78	0.00555172	0.951028	0.00254918	up-down	1.12	3.34	5.71	2.52	1.46	1.07	3.08	8.77	1.98	others
CsaV3_4G023290	1.33	1.69	1.1	4.2	4.55	4.75	2.09	1.31	1.79	0.000479919	0.907654	0.00776941	up-down	2.85	1.42	3.88	0.09	0.1	0.14	0.05	0.29	3.23	down
CsaV3_4G023490	3.44	0.88	0.73	176.38	64.2	20.25	1.21	3.95	2.43	9.21e-06	0.894398	3.36e-06	up-down	23.66	81.25	78.83	4.45	7.83	1.31	0.52	9.41	66.99	down
CsaV3_4G023620	6.75	4.63	2.62	35.6	20.31	12.11	0.67	4.55	3.53	0.000322394	0.755598	9.22e-06	up-down	12.58	100.08	45.33	0.78	1.86	0.29	32.37	12.8	60.9	down
CsaV3_4G023640	11.22	1.01	0.12	196.78	93.64	40.98	1.08	6.7	5.36	0.0214655	0.999918	1.28e-05	up-down	68.73	173.29	126.62	0.66	1.78	0	0.45	12.12	147.89	down
CsaV3_4G023820	1.98	1.95	1.15	101.11	54.13	31.95	2.29	5.17	2.54	7.48e-26	0.359385	9.47e-18	up-down	21.9	88.52	86.99	0.35	0.34	0.26	0.54	25.42	91.65	down
CsaV3_4G023830	0.3	0.45	0	107.93	60.3	35.26	0.19	0.84	0.3	2.34e-10	0.873595	1.05e-40	up-down	0.98	3.65	6.27	0.45	0.14	0.1	0.07	6.31	9.15	down
CsaV3_4G023940	3.55	1.8	2.53	31.81	11.55	8.57	2.7	3.15	3.7	4.14e-05	0.919062	1.08e-05	up-down	24.29	20.16	35.72	1.91	1.69	1.43	1.84	9.09	28.02	down
CsaV3_4G023950	0.44	0.45	0.63	18.78	13.32	5.39	1.15	0.77	0.58	1.36e-15	0.754595	2.03e-13	up-down	13.72	9.77	14.72	0.21	0.42	0.79	0.31	3.33	15.39	down
CsaV3_4G024020	4.4	6.42	8.22	21.46	19.33	15.05	5.43	5.7	6.71	0.000100407	0.954375	4e-07	up-down	11.55	10.43	15.25	3.94	6.79	5.49	7.42	8.26	12.3	down
CsaV3_4G024030	0.91	0.72	0.22	55.75	21.31	12.73	1.3	1.12	1.99	5.42e-15	0.509375	2.28e-14	up-down	8.63	6.01	12.99	0	0.06	0.09	0.32	1.77	10.45	down
CsaV3_4G024270	3.18	2.01	0.45	15.32	7.88	4.6	0.65	3.23	3.09	0.0300373	0.965477	0.0410682	up-down	19.48	22.25	30.2	4.32	8.79	3.02	4.17	6.78	18.77	down
CsaV3_4G024310	56.93	103.95	84.68	292.99	297.2	261.08	103.72	78.69	118.33	1.72e-05	0.903404	4.79e-05	up-down	161.95	182	207.65	377.43	285.61	363.38	141.81	169.35	276.56	up
CsaV3_4G025040	20.14	22.89	19.55	50.59	47.87	31.85	20.37	21.19	28.03	0.0105451	0.942926	0.0383657	up-down	20.13	24.48	33.72	12.44	8.38	8.94	14.23	17.47	23.95	down
CsaV3_4G025090	15.64	11.43	11.88	67.96	39.39	24.68	12.01	16.22	11.84	0.00201355	0.998717	0.000869038	up-down	47.51	29.62	104.38	4.74	3.33	1.92	3.71	10.96	104.42	down
CsaV3_4G025190	2.5	2.12	1.87	6.89	5.85	3.39	2.56	2.12	1.96	0.0312865	0.997319	0.0229889	up-down	1.01	1.03	1.84	0	0.42	0.25	0.38	0.57	0.87	down
CsaV3_4G025400	0.4	0.32	0.21	32.2	16.49	12.15	0.56	1.01	0.88	1.3e-16	0.619828	2.54e-16	up-down	2.21	2.62	4.01	3.1	6.81	4.02	0.37	1.73	5.73	others
CsaV3_4G025410	0.79	0.95	0	74.04	21.24	30.77	0.36	2.85	2.82	2.37e-14	0.601745	7.66e-11	up-down	18.13	4.91	11.91	0.87	0.24	0.16	0.12	0.79	11.69	down
CsaV3_4G025500	47.21	30.15	25.46	257.24	125.48	167.2	50.28	51.8	43.46	2.19e-07	0.629992	4.82e-07	up-down	76.33	85.65	73.01	88.88	101.02	93.14	44.6	49.77	71.89	others
CsaV3_4G025590	41.32	30.24	25.77	180.33	148.46	132.23	20.77	30.64	31.8	8.73e-11	0.847392	7.07e-17	up-down	80.64	77.44	69.81	105.66	120.52	64.63	43.64	41.7	67.34	others
CsaV3_4G025650	190.21	172.8	182.39	686.56	435.2	474.49	197.9	210.32	315.56	3.28e-06	0.586652	0.00365405	up-down	116.94	221.03	207.66	111.84	83.7	76.33	139.04	196.04	73.68	others
CsaV3_4G025680	14.53	3.83	1.93	205.86	55.02	45.44	5.6	13.39	6.01	0.00370377	0.966483	2.35e-08	up-down	24.97	33.42	69.06	0.78	1.55	0.97	0.86	1.99	14.41	down
CsaV3_4G025690	11.89	13.72	9.05	802.4	725.78	651.96	20.65	23.84	17.35	3.74e-119	0.210193	1.16e-94	up-down	116.63	123.28	134.44	120.94	28.49	36.39	3.62	12.52	80.73	others
CsaV3_4G025700	6.71	26.35	74.6	450.28	292.71	166.82	4.08	3.64	5.24	0.000242235	0.00503372	6.53e-34	up-down	11.98	16.62	6.67	64.93	25.89	37.06	12.39	16.46	13.22	up
CsaV3_4G025750	0.63	0.25	0.47	5.47	7.46	1.35	0	0	0.7	0.00944802	NA	0.00401853	up-down	2.92	2.57	7.83	1.29	0	0	0.57	0.93	2.47	down
CsaV3_4G025760	5.4	1.05	1.67	196.04	85.25	69.69	3.89	7.74	3.09	9.39e-16	0.795773	1.99e-18	up-down	92.95	159.65	163.03	3.15	9.54	2.93	0.72	4.98	37.48	down
CsaV3_4G025770	24.5	16.57	17.61	112.7	49.26	35.94	30.49	28.19	17.21	0.00672497	0.828353	0.032376	up-down	132.88	189.03	301.95	20.7	27.82	9.65	7.43	16.34	60.49	down
CsaV3_4G025830	23.98	42.07	32.67	59.74	92.24	67.96	41.6	31.57	38.88	0.00910746	0.941401	0.0126238	up-down	43.27	45.42	57.29	62.98	55.66	66.04	35.2	41.8	86.9	others
CsaV3_4G025840	9.56	11.82	6.53	26	27.22	13.77	7.53	8.25	8.53	0.0361345	0.903332	0.00201465	up-down	37.3	45.68	55.28	19.18	16.06	20.43	17.14	22.5	64.64	down
CsaV3_4G025860	11.22	11.32	14.06	30.5	24.47	25.96	10.71	11.62	19.18	0.00224055	0.94549	0.0411688	up-down	9.73	7.45	11.4	11.6	11.02	10.82	10.62	11.91	14.88	others
CsaV3_4G025930	52.31	36.04	31.55	105.15	72.22	77.58	38.64	42.77	46.57	0.0341129	0.983791	0.0064794	up-down	58.49	61.3	60.06	45.95	46.52	36.79	37.01	48.35	68.83	others
CsaV3_4G026040	0.56	0.17	0.4	6.5	3.45	0.85	0.49	0.67	0.56	0.00294955	0.914436	0.00533607	up-down	0.14	0	0.19	0.12	0.33	0	0.2	0.31	0	others
CsaV3_4G026510	12.58	12.48	11.36	34.41	25.68	28.31	7.8	10.39	9.79	0.00085884	0.656759	9.47e-06	up-down	79.22	62.08	81.74	175.17	165.61	122.5	91.28	63.8	68.31	up
CsaV3_4G026530	3.85	10.49	4.48	35.21	34.63	46.52	14.59	10.9	11.27	3.18e-07	0.378633	3.25e-05	up-down	48.22	33.84	41.62	39.29	39.47	13.55	19.93	34.79	37.61	others
CsaV3_4G026790	45.64	25.1	40.02	128.64	247.52	166.49	55.43	60.4	29.28	4.92e-07	0.811096	3.12e-05	up-down	10.01	8.13	1.65	9.49	1.35	0.58	0.52	2.48	2.05	others
CsaV3_4G026930	2.86	3.28	5.56	20.91	18.03	12.4	3.33	4.42	2.23	0.000293636	0.954406	3.88e-05	up-down	0	0.55	0	1.69	0.46	1.89	0.93	0	0.93	others
CsaV3_4G026970	14.73	12.38	9.15	41.19	71.2	46.11	5.02	6.13	6.43	1.2e-07	0.0201522	8.67e-23	up-down	0.82	3.49	2.38	0.6	2.62	3.96	3.6	21.38	1.68	others
CsaV3_4G027080	7.1	10.72	7.24	23.48	20.98	22.74	13.82	9.56	11.56	0.000302225	0.661906	0.0329999	up-down	6.59	6.83	17.33	3.61	4.2	4.23	10.05	8.29	11.33	others
CsaV3_4G027270	35.2	64.64	59.82	147.99	166.19	118.54	70.34	34.35	91.07	0.00169723	0.919023	0.0400856	up-down	57.68	78.35	77.98	24.73	28.42	29.82	58.71	71.31	92.13	down
CsaV3_4G027290	206.86	270.43	304.2	452.64	608.15	585.61	130.11	186	288.34	0.00564272	0.705868	0.000307053	up-down	326.72	336.95	472.63	347.05	350.35	231.1	319.65	324.27	594.03	others
CsaV3_4G027320	0.98	1.56	2.37	8.54	14.93	11.09	1.31	1.39	4.91	7.6e-06	0.882595	0.00244484	up-down	16.97	21.08	33.61	0	0.85	1	0.49	11.78	123.6	down
CsaV3_4G027530	4.65	3.88	4.84	13.81	7.41	8.54	3.38	5.22	4.97	0.0321029	0.995121	0.0301493	up-down	1.22	1.14	1.13	0.95	2.24	0.56	1.27	1.46	1.14	others
CsaV3_4G027710	62.39	30.6	27.85	165.59	81.94	75.27	47.86	71.09	36.61	0.0203972	0.86242	0.0457721	up-down	38.94	42.83	48.92	58.11	46.84	37.42	29.23	36.44	63.36	others
CsaV3_4G027850	13.19	14.8	6.02	734.37	313.03	275.59	5.98	7.51	11.48	3.38e-25	0.784151	7.44e-41	up-down	173.55	305.09	364.12	21.86	15.19	8.64	9.53	17.06	98.51	down
CsaV3_4G027890	10.4	6.09	9.27	27.35	17.5	14.73	8.04	11.27	10.58	0.035671	0.932736	0.0489304	up-down	10.11	17.11	16.62	5.58	7.97	6.85	4.87	6.98	20.91	down
CsaV3_4G028130	9.44	17.38	10.41	72.86	96.4	48.29	7.57	6.26	11.86	5.73e-10	0.576416	4.89e-17	up-down	22.65	30.71	61.32	3.76	6.66	2.5	4.54	15.38	59.76	down
CsaV3_4G028840	4.85	5.23	5.33	21	13.83	11.09	2.92	4.17	6.78	0.000270357	0.930853	0.000344664	up-down	11.33	8.64	19.71	1.95	3.17	2.21	4.35	7.79	16.58	down
CsaV3_4G028900	1.38	1.69	1.21	6.6	6.07	2.06	1.47	1.55	2.13	0.0187608	0.942926	0.0374794	up-down	7.15	9.17	9.09	2.34	5.92	5.72	2.39	2.68	8.88	others
CsaV3_4G029090	49.93	63.22	55.86	118.61	139.99	111.42	49.57	50.65	53.88	5.87e-05	0.854204	2.35e-06	up-down	127.61	132.74	101.44	69.08	75.3	78.95	94.48	85.35	111.41	others
CsaV3_4G029660	43.95	45.05	42.63	131.44	140.39	107.33	32.39	26.85	54.89	2.52e-07	0.880146	8.9e-06	up-down	4.23	5.92	20.89	3.59	5.13	6.81	6.84	17.07	17.2	others
CsaV3_4G029880	2.36	1.68	2.7	7.19	6.77	6.6	3.55	3.26	3.29	0.000133247	0.569156	0.0157707	up-down	2.04	2.91	2.97	2.74	2.68	3.22	3.46	2.41	3.73	others
CsaV3_4G029960	0.36	0	0.13	1.69	1.97	2.59	0	0	0.27	0.00881287	NA	0.00465768	up-down	0.31	0.08	0.64	3.26	3.14	0.4	0.1	0.56	0	up
CsaV3_4G030040	9.35	9.47	8.14	22.89	25.75	19.75	14.05	11.18	9.56	6.16e-05	0.828353	0.0114601	up-down	15.03	12.66	9.73	16.11	11.84	16.84	8.89	11.98	14.87	others
CsaV3_4G030510	13.16	33.16	32.58	61.61	98.85	56.59	14.61	10.36	15.64	0.00714199	0.12738	1.65e-13	up-down	32.36	38.78	32.81	30.23	33.02	32.79	16.38	22.01	35.31	others
CsaV3_4G030600	29.47	35.91	41.92	60.51	67.94	71.71	25.38	28.85	33.56	0.00937884	0.622384	5.14e-05	up-down	33.56	32.12	38.45	23.42	35.48	26.09	34.45	35.26	41.14	others
CsaV3_4G030710	4.07	4.99	4.41	32.5	34.03	28.57	4.11	4.95	4.97	2.03e-29	0.990973	1.17e-24	up-down	13.35	8.5	12.31	3.78	4.78	5.29	8.36	3.55	18.65	down
CsaV3_4G031010	16.64	15.27	16.59	91.02	55.3	67.18	16.26	19.61	19.75	8.72e-11	0.880146	2.13e-09	up-down	21.76	20.56	22.41	25.11	30.16	18.46	15.65	16.69	21.64	others
CsaV3_4G031060	31.71	36.56	37.21	77.91	71.1	67.52	36.12	32.36	38.8	0.00023272	0.995097	0.000660742	up-down	44.78	49.33	55.4	56.2	62.75	39.43	50.17	41.91	59.72	others
CsaV3_4G031200	11.31	10.05	10.98	25.3	21.93	25.72	11.43	16.23	9.28	9.98e-05	0.921724	0.0311472	up-down	6.68	5.77	5.92	5.71	6.28	7.19	5.2	4.98	6.16	others
CsaV3_4G031590	30.47	28.55	27.97	55.33	51.32	50.56	29.94	34.01	33.53	0.00454897	0.913113	0.0341471	up-down	21.08	20.22	21.6	22.74	18.19	13.09	18.72	16.59	22.31	others
CsaV3_4G031710	135.37	110.08	108	687.04	369.67	503.1	140.39	135.57	149.03	5.4e-09	0.775353	1.37e-08	up-down	140.28	177.59	160.7	181.22	215.33	168.72	84.36	98.82	107.58	others
CsaV3_4G032000	125.42	131.91	129.8	474.37	531.85	463.91	40.3	67.8	78.22	2.81e-25	0.00361573	4.65e-23	up-down	28.99	41.55	78.53	44.8	44.73	16.52	58.34	62.75	38.58	others
CsaV3_4G032410	43.78	37.39	37.09	141.23	101.99	102.48	25.98	40.38	54.71	2.63e-06	0.995935	0.000135061	up-down	39.58	63.93	96.31	26.62	29.51	15.68	73.33	90.66	78.02	down
CsaV3_4G032420	16.79	24.72	17.69	38.29	42.16	36.8	13.98	15.23	29.9	0.00684067	0.988733	0.0413412	up-down	18.62	22.32	32.93	9.93	15.54	10.32	22.78	25.37	24.09	others
CsaV3_4G032430	162.29	165.57	138.83	592.2	388.06	406.66	141.26	137.87	228.48	3.39e-06	0.9691	7.02e-05	up-down	161.42	206.09	251.85	60.07	72	66.76	152.27	173.15	127.04	down
CsaV3_4G032550	1.75	2	0	446.09	227.85	172.79	2.67	1.64	2.64	1.58e-30	NA	9.91e-40	up-down	61.36	100.72	146.23	211.84	278.93	167.69	30.38	176.88	280.38	up
CsaV3_4G032560	43.21	36.46	32.68	155.09	143.22	118.94	41.54	45.78	38.37	4.36e-15	0.951028	2.14e-14	up-down	97.82	100.91	105.78	162.1	167.91	160.85	64.48	82.02	127.88	up
CsaV3_4G032670	102.41	85.22	75.96	488.34	226.23	266.97	69.99	88.34	95.99	2.99e-05	0.952722	7.83e-07	up-down	44.59	43.54	61.26	12.61	12.18	8.49	12.08	24.92	70.92	down
CsaV3_4G032790	30.66	31.21	31.56	78.84	71.54	64.83	38.11	35.05	47.69	2.29e-05	0.596276	0.0231797	up-down	31.63	32.39	28.56	35.29	27.74	32.62	26.48	24.34	35.56	others
CsaV3_4G032890	8.41	5.31	3.41	32.92	25.96	15.99	4.19	5.65	5.5	3.66e-05	0.942926	5.56e-10	up-down	12.94	21.01	28.68	0.51	0.71	0.68	0.59	6.19	12.78	down
CsaV3_4G033160	3.15	2.65	5.53	15.77	11.9	11.22	2.62	6.12	6.26	0.000366604	0.871563	0.0126849	up-down	3.26	4.32	4.33	6.8	5.08	3.16	5.03	3.42	3.1	others
CsaV3_4G033300	0.03	0.25	0.04	5.51	6.54	1.76	0.2	0.23	0.15	1e-09	NA	4.58e-11	up-down	19.69	7.37	15.91	0.26	0	0.05	0.36	1.22	20.64	down
CsaV3_4G033420	44.16	32.11	17.18	61.45	165	52.82	31.65	32.35	37.66	0.0385365	0.980046	0.00808449	up-down	20.03	25.35	48.5	5.17	26.55	14.8	15.35	58.53	26.52	others
CsaV3_4G033450	18.69	13.28	12.14	36.74	34.42	26.01	12.4	14.93	12.63	0.0155823	0.910776	0.000213009	up-down	30.33	23.36	19.2	41.15	46.29	41.08	19.32	21.18	27.09	up
CsaV3_4G033720	17.28	27.27	21.97	37.68	58.76	34.71	13.61	14.37	19.52	0.0342325	0.339379	3.09e-05	up-down	26.2	22.65	24.72	18.23	23.57	18.18	11.16	13.83	24.83	others
CsaV3_4G033770	16.63	22.62	16.04	38	54.12	30.24	8.49	10.52	11.9	0.00375433	0.30179	1.95e-07	up-down	29.58	22.26	42.11	32.6	22.13	23.82	19.46	25.1	39.38	others
CsaV3_4G034000	3.76	5.12	5.47	37.18	29.93	14.81	4.29	5.3	6.88	1.56e-08	0.921724	5.56e-08	up-down	13.55	9.98	17.74	0.7	1.41	0.58	2.36	5.15	47.74	down
CsaV3_4G034160	107.67	75.25	77.85	244.05	190.85	230.28	75.17	109.35	129.28	0.000312275	0.876754	0.00453377	up-down	72.79	83.07	69.77	87.69	89.45	79.84	46.86	50.93	71.21	others
CsaV3_4G034490	12.29	9.18	11.32	28.88	20.11	19.87	10.25	12.49	9.68	0.038303	0.984815	0.0248542	up-down	14.34	15.11	15.13	11.85	20.23	12.83	9.81	9.61	22.12	others
CsaV3_4G034500	2.59	0.35	0.98	64.24	13.18	15.72	1.59	2.39	1.79	1.87e-07	0.90323	2.63e-10	up-down	2.73	1.93	5.32	0.62	0.13	0.09	0.34	1.85	3.18	down
CsaV3_4G034510	1.63	1.35	0.76	26.09	9.52	5.9	0.6	1.89	2.42	2.52e-06	0.938987	1.6e-05	up-down	9.59	12.88	30.26	0	0.48	0.76	0.98	6.38	13.29	down
CsaV3_4G034640	4.99	9.4	9.9	70.29	55.16	40.59	5.79	11.16	12.58	9.29e-08	0.951028	8.53e-07	up-down	7.38	8.97	8.93	7.31	8.77	6.89	13.38	6.91	10.15	others
CsaV3_4G034900	81.28	110.4	114.23	365.8	411.74	462.42	46.6	87.34	50.8	0.000449372	0.691589	1.05e-06	up-down	35.49	49.22	33.96	134.66	128.15	91.6	84.55	94.95	35.78	up
CsaV3_4G034990	17.8	20.99	20.74	32.39	34.07	33.48	15.59	18.57	16.55	0.0195215	0.631742	0.000426018	up-down	16.34	16.68	16.97	14.11	16.59	16.74	18.79	17.36	14.57	others
CsaV3_4G035020	0.32	0.19	0.18	1.57	4.37	3.81	0.55	0.3	0.36	0.00390622	NA	0.00984404	up-down	0.25	0	0	0.44	0.24	0.82	0	0.34	0	others
CsaV3_4G035350	20.4	27.75	34.96	55.41	88.01	77.25	12.65	16.02	26.43	0.000301179	0.414166	1.28e-07	up-down	7.13	9.59	10.26	17.92	10.21	10.74	7.59	6.32	10.55	others
CsaV3_4G035740	6.55	4.2	3.6	10.4	9.85	7.16	2.13	3.88	2.98	0.0438741	0.404278	2.96e-05	up-down	12.9	11.1	12.14	32.01	39.67	39.71	26.45	15.71	17.23	up
CsaV3_4G035750	1.29	1.41	1.03	12.46	10.75	2.87	0.88	0.88	2.95	0.000136298	0.952748	0.00132089	up-down	16.72	34.54	55.81	10.74	16.93	11.68	4.71	12.42	22.85	down
CsaV3_4G035760	97.27	99.32	92.89	539.82	569.17	311.8	100.75	83.95	114.39	3.01e-12	0.995121	2.54e-12	up-down	418.82	540.04	973.3	50.53	93.42	85.89	117.74	368.45	705.08	down
CsaV3_4G035790	8.03	12.8	10.13	18.83	27.95	17.6	9.33	7.08	11.57	0.0223721	0.912722	0.00364575	up-down	13.14	13.25	16.68	6.03	7	10.24	9.64	11.74	16.76	others
CsaV3_4G035840	4.3	7.92	7.37	19.22	17.74	13.03	9.35	6.28	8.37	0.00286717	0.865596	0.0150657	up-down	4.26	11.64	7.32	3.95	5.17	3.38	2.05	5.07	12	others
CsaV3_4G035900	35.38	49.59	86.02	532.24	190.54	184.3	2.42	1.44	3.92	6.71e-05	7.33e-22	4.17e-44	up-down	5.83	6.23	3.77	68.22	19.54	31.62	5.21	4.3	4.05	up
CsaV3_4G036120	0.66	0.2	0	4.85	6.18	1.79	0.67	0.62	1.02	0.000440448	0.742888	0.001645	up-down	5.35	9.14	10.26	0	0.22	0.41	0.3	2.61	8.46	down
CsaV3_4G036150	10.06	19.61	26.02	29.24	125.53	67.07	30.34	14.03	27.36	0.0129835	0.907654	0.0279386	up-down	42.51	88.29	66.11	43.28	48.09	70.24	134.51	231.23	42.88	others
CsaV3_4G036260	46.06	46.96	42.54	521.39	340.83	344.4	36.56	44.53	39.63	5.22e-28	0.832839	1.08e-31	up-down	76.01	72.48	92.9	102.01	105.98	61	37.74	42.74	62.36	others
CsaV3_4G036350	123.77	118.59	125.35	592.42	507.26	421.58	135.94	149.84	143.02	2.13e-16	0.78403	1.09e-12	up-down	295.95	364.51	192.36	965.05	1094.37	765.04	236.38	212.36	490.96	up
CsaV3_4G036360	14.34	20.5	21.43	46.57	76.52	61.97	13.23	14.34	27.76	2.74e-06	0.981287	3.99e-05	up-down	6.95	4.33	7.46	25.69	15.95	7.35	12.82	8.04	11.35	up
CsaV3_4G036400	5.92	10.01	6.45	65.54	38.09	20.14	3.28	4.3	5.86	7.99e-05	0.623597	2.81e-08	up-down	14.95	12.34	35.35	0.88	2.88	2.2	1.79	10.28	15.1	down
CsaV3_4G036530	3.46	5.82	4.54	10.28	14.43	7.82	5.25	3.4	5.17	0.011488	0.990973	0.00752245	up-down	3.25	2.64	3.18	0.45	0.49	2.01	1.04	1.57	3.89	others
CsaV3_4G036690	69.58	62.56	62.41	179.78	133.64	103.46	65.67	56.8	83	0.00998462	0.98395	0.0155722	up-down	76.38	105	144.89	66.76	74.51	57.52	28.77	95.29	136.22	others
CsaV3_4G037110	28.96	19.83	19.31	87.49	39.7	40.49	11.93	24.74	27.17	0.0354026	0.954375	0.0137041	up-down	17.73	19.95	31.65	14.24	10.58	10.47	13.01	18.82	31.16	others
CsaV3_4G037660	7.92	7.8	5.08	22.33	39.42	10.45	3.98	6.42	4.85	0.00786919	0.715266	8.18e-05	up-down	3.35	37.64	14.85	3.48	6.69	1.19	1.36	4.24	7.54	others
CsaV3_4G037670	258.9	313.52	281.82	474.17	767.78	570.77	238.54	226.47	306.9	0.00237105	0.826299	0.000200414	up-down	205.35	315.5	260.55	122.1	167.93	236.86	279.45	361.5	208.54	others
CsaV3_4G037700	32.63	34.46	32.81	204.04	147.33	135.03	28.48	28.65	35.1	1.8e-15	0.880146	2.24e-17	up-down	128.22	101.34	124.97	114.44	138.87	68.72	51.5	55.12	125.07	others
CsaV3_4G037760	103.84	136.15	141.65	261.59	307.35	207.66	87.06	107.71	108.67	0.00617693	0.436601	1.63e-06	up-down	69.35	69.57	70.66	33.95	48.4	47.5	40.07	63.95	62.94	others
CsaV3_4G037780	0.54	0.96	0.71	12.09	8.26	3.85	0.92	0.98	1.03	3.83e-09	0.878377	1e-08	up-down	7.53	4.79	7.76	2.19	2.25	2.16	4.18	3.13	7.1	down
CsaV3_4G037790	2.93	2.29	1.87	95.38	48.02	45.51	3	3.91	9.88	1.32e-18	0.507682	7.02e-11	up-down	18.81	15.49	24.02	6.44	8.37	1.67	9.12	9.63	41.26	down
CsaV3_5G000040	14.22	15.6	13.45	49.48	22.52	28.58	18.11	16.3	16.2	0.022992	0.871563	0.00417568	up-down	2.69	4.55	3.8	7.03	1.36	3.93	3.05	5.41	3.86	others
CsaV3_5G000250	128.76	199.55	181.88	338.03	392.59	295.46	181.63	127.38	211.4	0.0195043	0.999035	0.0188041	up-down	228.9	255.38	265.46	179.55	183.83	175.04	155.04	200.34	294.77	others
CsaV3_5G000270	72.17	54.68	41.16	157.9	88.91	93.56	58.52	51.65	52.37	0.00685093	0.758828	0.00020422	up-down	53.75	66.48	70.93	45.8	60.43	40.99	47.53	47.26	71.15	others
CsaV3_5G000340	44.38	17.57	33.67	94.86	66.52	131.77	16.72	26.95	29.77	0.0174197	0.893005	0.00100947	up-down	21.2	33.16	43.39	32.67	29.56	6.09	21.34	30.18	35.51	others
CsaV3_5G000450	10.42	13.52	14.76	30.64	32.36	28.21	10.84	10.28	14.88	0.00107026	0.567806	3.22e-06	up-down	30.75	18.62	20.94	21.29	23.63	17.88	12.05	8.59	23.65	others
CsaV3_5G000700	5.95	6.05	6.18	26.31	21.67	14.22	6.06	7.96	7.8	2.28e-05	0.873595	0.000454811	up-down	24.77	21.74	21.04	17.37	16.48	22.54	12.76	16.57	42.29	others
CsaV3_5G001030	11.51	7.83	3.98	295.54	164.8	98.51	1.15	14.78	16.58	1.65e-15	0.942622	0.000356077	up-down	245.01	86.82	290.32	1.99	3.89	1.78	2.86	40.45	441.85	down
CsaV3_5G001140	5.92	1.86	1.82	77.75	23.31	9.42	1.1	2.91	1.99	0.00783041	0.72711	0.000156995	up-down	28.59	43.57	42.87	2.94	6.6	1.96	0.6	4.14	67.04	down
CsaV3_5G001480	1.9	1.28	0.36	140.52	156.83	59.17	1.34	4.1	3.32	7.64e-31	0.516209	5.78e-30	up-down	4.3	2.15	6.44	1.33	0	0	0	3.15	9.84	others
CsaV3_5G001820	17.41	25.91	18.7	37.97	50.62	33.89	22.29	15.67	16.92	0.0211964	0.874938	0.00184783	up-down	28.6	26.01	27.05	31.07	26.47	36.11	36.49	30.21	34.73	others
CsaV3_5G001900	41.2	29.78	32.1	118.15	116.14	59.63	29.49	34.5	23.76	0.00119297	0.827792	1.52e-05	up-down	37.53	36.28	47.29	12.73	16.48	9.4	13.61	26.84	131.83	down
CsaV3_5G001960	144.05	110.25	92.07	378.39	318.74	165.29	131.91	142.99	115.09	0.0165175	0.942926	0.0139252	up-down	188.92	308.8	375.57	53.03	101.44	77.29	84.86	270.35	316.28	down
CsaV3_5G002020	3.04	1.73	2.15	11.16	7.37	7.01	1.96	3.08	1.54	0.000287092	0.978161	0.000129186	up-down	14.39	37.64	18.09	4.22	6.45	2.07	2.91	12.55	10.68	down
CsaV3_5G002040	44.5	37.38	38.2	223.49	178.05	118.52	30.69	44.22	42.66	3.21e-09	0.969821	4.83e-10	up-down	58.62	75.47	80.27	17.64	17.66	14.22	19.62	28.17	61.39	down
CsaV3_5G002330	0.36	0	0	3.74	1.38	2.53	0	0.17	0	0.0180037	NA	0.00509372	up-down	9.51	13.95	11.62	0	0	0	0	1.46	27.32	down
CsaV3_5G002420	4.73	10.74	2.28	64.46	64.82	38.08	2.27	2.16	16.21	3.67e-05	0.988655	0.000512202	up-down	94.57	46.39	117.21	1	0	0.75	4.71	39.93	75.38	down
CsaV3_5G002430	5.49	9.95	0.79	602.45	316.29	259.32	7.89	6.51	14.31	7.46e-24	0.846732	1.65e-30	up-down	140.85	80.78	190.02	1.79	0.73	1	1.98	36.74	301.6	down
CsaV3_5G002520	0.14	0.33	0.62	5.71	3.17	0.3	0	0.26	0.62	0.047736	NA	0.0278254	up-down	4.17	16.04	14.81	0	0	0.3	0	1.23	11.41	down
CsaV3_5G003190	3.64	2.98	3.34	28.09	22.49	11.25	2.05	2.15	1.11	2.55e-07	0.441822	8.71e-12	up-down	1.51	0.54	0.8	2.52	2.31	4.35	0	1.7	0.81	up
CsaV3_5G003200	0.18	0.05	0.42	3.3	3.82	2.48	0.35	0.28	0.25	3.31e-08	0.951527	1.92e-09	up-down	0.2	0.54	0.36	0	0	0.27	0	0	0.13	others
CsaV3_5G003260	1.6	1.87	1.58	3.74	6.35	3.05	0.89	0.86	1.49	0.0480375	0.706261	0.00213327	up-down	0.27	0.21	0.06	0.36	0.39	0.27	0.33	0.99	0.35	others
CsaV3_5G003590	156.61	165.93	167.32	311.44	323.05	261.09	169.48	138.84	170.52	0.00925424	0.948236	0.00716792	up-down	173.03	191.9	200.51	226.75	237.88	159.43	232.81	238.92	208.19	others
CsaV3_5G003760	12.01	19.45	14.65	37.27	38.59	25.8	12.54	8.89	16.51	0.0229045	0.856271	0.00235238	up-down	27.41	25.04	41.1	25.59	12.05	6.43	17.87	20.64	22.96	others
CsaV3_5G003910	1.28	0.16	0.53	7.73	11.95	3.09	0.78	1.02	0.68	7.14e-05	0.968851	1.2e-06	up-down	1.72	3.45	2.73	5.88	22.72	5.87	2.01	3.56	11.97	up
CsaV3_5G004430	1.77	1.69	1.65	5.37	4.3	2.9	1.74	1.47	1.4	0.00881287	0.972744	0.00507217	up-down	0.36	1.24	1.4	0	0.64	0.32	0	0.11	2.5	others
CsaV3_5G004510	0.27	0.25	0.15	3.43	2.57	2.23	0.32	0.13	0.23	2.06e-05	NA	2.02e-05	up-down	0.34	0	1.14	0	0.52	0	0	0	1.31	others
CsaV3_5G004830	6.08	6.94	5.51	15.47	16.83	9.17	4.56	5.49	7.13	0.0118851	0.92482	0.00358037	up-down	5.47	6.07	8.42	2	2.09	2.66	2.99	3.59	10.98	down
CsaV3_5G004890	133.65	249.19	160.17	417	708.68	574.99	100.71	93.65	201.31	0.00017319	0.683602	2.39e-07	up-down	32.56	36.11	48.15	23.68	25.11	19.31	51.26	86.4	45.81	others
CsaV3_5G005000	1.67	0.72	0.44	52.41	8.48	3.21	1.03	2.24	0.33	3.43e-05	0.96553	0.0112993	up-down	26.07	174.63	65.7	0.32	0.86	0.82	0.78	2.51	37.55	down
CsaV3_5G005030	0.08	0.31	0.1	5.36	3.82	1.59	0.29	0.26	0.1	4.23e-09	0.944209	2.33e-09	up-down	0	0.04	0	0	0	0	0	0.04	0.18	others
CsaV3_5G005050	4.91	7.77	6.56	19.14	19.46	14.45	4.11	4.92	7.96	9.2e-06	0.896531	5.43e-06	up-down	3.96	1.36	6.45	0	0.19	0.27	0.89	2.9	5.58	down
CsaV3_5G005400	28.34	31.95	28.41	83.37	69.8	74.22	35.58	33.66	33.2	1.38e-06	0.856637	0.000165053	up-down	25.61	26.75	31.06	31.61	28.24	20.7	40.58	32.36	32.73	others
CsaV3_5G005540	51.16	60.61	61.07	138.64	124.34	110.86	74.04	75.18	74.01	2.42e-05	0.35628	0.0271432	up-down	33.88	30.9	31.63	28.03	32.11	43.18	29	33.6	39.4	others
CsaV3_5G005810	1.4	0.33	0.3	13.53	5.61	3.54	1.55	2.11	1.22	0.00513275	NA	0.0351841	up-down	8.48	15.84	18.35	1.8	1.63	0.45	0.33	2.16	41.85	down
CsaV3_5G005970	120.51	265.81	202.83	421.88	523.71	772.46	152.16	232.31	267.7	0.00142785	0.9593	0.000829338	up-down	209.02	249.93	364.47	362.96	269.49	239.94	379.09	390.39	385.96	others
CsaV3_5G006170	0.24	0.35	0.27	2.95	2.2	2.37	1.01	0.86	0.92	4.4e-06	0.182262	0.0283001	up-down	0.3	1.08	1.08	0.27	0.82	0.07	0.1	0.82	1.69	others
CsaV3_5G006540	5.15	6.15	5.47	20.79	20.12	12.99	2.86	3.74	6.52	1.53e-06	0.756916	1.2e-06	up-down	6.82	4.55	5.96	2.83	3.96	2.06	1.44	3.23	12.23	others
CsaV3_5G006610	0	0	0.29	4.61	1.81	0.83	0	0.05	0.34	0.00058644	NA	0.000220235	up-down	2.1	1.25	0.7	0.19	0	0	0	0	0.55	down
CsaV3_5G006930	7.96	7.91	10.02	26.17	40.57	21.24	8.67	6.48	13.39	0.00176418	0.979387	0.00650923	up-down	12.16	17.91	17.07	15.59	16.03	12.37	5.86	6.47	17.26	others
CsaV3_5G008030	18.97	30.69	25.7	39.79	48.94	58.18	14.5	16.51	25.6	0.0423812	0.645657	0.000823913	up-down	43.01	40.57	52.2	30.65	33.6	31.32	29.55	35.14	54.98	others
CsaV3_5G008290	1.84	1.28	1.54	12.5	11.85	12.72	1.05	2.18	1.88	1.87e-08	0.989038	2.31e-07	up-down	11.94	13.85	12.72	22.02	20.43	20.72	16.05	9.76	30.86	up
CsaV3_5G008380	9.67	26.2	17.32	56.38	62.61	36.55	33.26	21.7	23.42	0.00450278	0.657671	0.0406922	up-down	29.07	26.83	36.77	20.37	16.15	24.72	33.29	32.7	30	others
CsaV3_5G008390	12.95	25.1	20.01	50.21	62.73	34.99	18.62	14.4	21.6	0.00338643	0.954406	9.86e-05	up-down	34.03	20.8	21.97	14.02	8.29	14.35	11.92	16.88	30.56	down
CsaV3_5G008580	10.24	9.43	10.34	40.9	39.98	20.89	6.27	11.48	11.84	5.44e-05	0.983791	0.000136308	up-down	31.67	24.11	39.21	6.15	12.41	6.23	13.67	16.35	54.42	down
CsaV3_5G008680	12.49	15.56	29.03	549.44	193.35	201.83	2.16	2.35	1.86	1.06e-13	7.19e-08	6.33e-45	up-down	0.58	0.89	0	16.82	2.53	14.86	0.29	1.06	2.09	up
CsaV3_5G008750	1.76	3.81	2.75	17.28	10.39	7.7	1.4	1.18	0.55	0.00639781	0.543186	1.76e-05	up-down	0.32	0.37	0.29	3.13	0	1.06	0.31	1.75	0.62	others
CsaV3_5G008760	221.99	352.3	762.83	6025.22	3053.26	3590.56	10.86	13.41	9.86	1.2e-09	2.95e-28	9.15e-133	up-down	2.44	30.69	12.19	401.11	98.9	332.23	6.97	17.59	13.22	up
CsaV3_5G010180	12.41	21.02	21.39	35.72	50.05	37.81	14.37	10.06	21.17	0.00985499	0.805238	0.000488377	up-down	9.09	21.14	18.5	5.26	5.63	4.28	16.46	17.59	17.17	down
CsaV3_5G010640	2.12	0.97	1.66	4.36	4.13	3.99	1.32	0.94	1.35	0.0445742	0.859182	0.00161375	up-down	15.89	18.8	19.49	45.26	41.38	24.47	8.03	8.54	12.28	up
CsaV3_5G010650	1.25	0.64	1.35	9.67	6.74	4.25	1.77	1.62	1.12	1.67e-05	0.878273	0.000112515	up-down	18.34	35.32	24.85	37.01	58.96	25.53	3.64	5.34	18.64	others
CsaV3_5G010670	20.04	30.14	27.96	47.76	57.31	51.84	16.45	20.57	27.2	0.00605423	0.773424	0.000254748	up-down	44.23	36.09	39.54	37.04	46.39	28.39	22.73	27.77	40.9	others
CsaV3_5G011080	26.81	39.67	29.99	548.9	523.39	232.2	22.05	23.74	37.5	2.12e-21	0.856399	7.44e-26	up-down	228.52	105.97	351.5	10.4	6.98	3.8	11.37	60.61	432.01	down
CsaV3_5G011140	28.45	36.57	34.3	114.58	111.08	126.87	24.24	27.33	33.01	1.25e-12	0.648773	2.91e-20	up-down	27.28	24.98	25.11	24.18	35.13	17.76	17.47	19.04	18.76	others
CsaV3_5G011160	36.24	23.25	22.53	98.35	81.83	81.72	30.36	43.17	42.44	1.94e-05	0.611861	0.000463496	up-down	10.01	18.44	17.19	3.81	9.75	12.51	17.91	23.25	6.22	others
CsaV3_5G013180	32.98	53.77	50.55	118.59	139.04	123.51	61.42	42.42	61.81	5.87e-06	0.852668	0.000179637	up-down	49.09	51.57	64.11	60.14	56.57	54.21	55.33	50.31	57.95	others
CsaV3_5G013320	9.83	10.29	8.92	21.71	21.91	21.62	8.12	8.2	8.23	3.07e-05	0.687775	1.04e-07	up-down	12.79	10.66	7.8	6	11.65	9.4	5.89	6.66	10.22	others
CsaV3_5G013550	6.77	8.57	6.46	51.09	19.39	20.58	6.92	6.84	8.39	0.000328187	0.996313	7.59e-05	up-down	0.99	0.41	0.8	1.27	0.6	0.36	0.97	1.14	0.82	others
CsaV3_5G014360	2.79	3.46	3.13	9.71	9.27	8.19	5.56	3.54	3.46	2.67e-06	0.731613	0.0131857	up-down	9.12	13.46	20.38	26.55	15.04	19.8	21.66	28.44	23.68	others
CsaV3_5G014690	32.68	30.06	32.36	91.45	77.66	50.67	36.09	46.32	34.49	0.000328187	0.696251	0.00577767	up-down	40.92	44.09	52.42	36.17	36.42	44.42	21.53	31.67	49.5	others
CsaV3_5G014710	8.44	16.36	16.27	28.98	46.54	27.33	10.68	11.49	12.33	0.00847078	0.852668	1.94e-05	up-down	13.53	21.2	17.09	5.02	7.95	8.42	9.62	12.95	29.72	down
CsaV3_5G015150	10.45	10.84	14.89	27.28	38.44	32.27	11.74	11.75	13.57	2.33e-05	0.999669	3.15e-06	up-down	0.51	3.33	3.57	2.45	3.3	5.82	2.6	8.01	1.13	others
CsaV3_5G017200	9.34	4.23	4.55	27.99	18.49	15.06	7.3	8.58	3.77	0.00590052	0.985958	0.00398058	up-down	99.8	23.99	22.65	9.85	7.81	5.58	4.35	7.48	44.74	down
CsaV3_5G017290	7.6	6.14	4.1	43.57	18.06	8.25	3.99	5.07	2.69	0.0126415	0.598632	6.9e-05	up-down	60.45	31.95	41.95	28.63	53.48	31.77	17.94	14.81	62.02	others
CsaV3_5G018790	5.66	21.99	17.47	212.21	450.87	232.42	8.85	6.51	5.54	2.46e-15	0.455679	5.31e-36	up-down	40.6	63.27	70.02	259.71	121.77	82.81	50.41	71.43	58.08	up
CsaV3_5G018810	28.52	33.47	34.86	51.62	74.65	50.83	28.84	31.16	32.35	0.0157602	0.898214	0.00279507	up-down	14.13	16.48	13.96	5.77	10.41	9.7	11.83	13.1	11.18	others
CsaV3_5G018820	22.7	80.66	55.82	122.1	264.23	143.57	78.98	34.42	56.81	0.00971444	0.985382	0.00173198	up-down	48.55	47.74	85.39	40.57	34.56	44.09	85.92	97.85	107.65	others
CsaV3_5G018840	0.78	2.66	1.25	63.13	14.48	17.79	0.42	2.2	0.42	3.4e-06	NA	2.46e-07	up-down	13.62	9.22	14.64	0.35	0.76	0.78	0.97	3.05	19.22	down
CsaV3_5G018850	8.73	13.19	8.82	557.21	376.75	257.19	14.77	10.09	14.85	1.34e-32	0.916047	1.13e-33	up-down	187.48	114.25	151.51	27.98	7.6	6.85	11.83	24.69	360.74	down
CsaV3_5G018880	13.91	11.63	15.49	51.08	37.97	29.85	13.79	15.33	14.64	1.34e-07	0.979381	3e-06	up-down	21.1	24.18	27.26	31.56	32.51	23.37	15.51	24.19	23.28	others
CsaV3_5G020120	0.98	0.47	0.29	4.94	1.67	1.6	0.52	0.54	0.32	0.0151828	0.929166	0.000390291	up-down	1.33	1.52	1.56	0.25	0.13	0	0.24	0.22	3.4	down
CsaV3_5G020270	73.08	76.97	69.84	240.26	193.41	160.87	15.68	40.98	64.47	2.19e-06	0.313312	4.12e-06	up-down	21.95	33.35	52.62	11.7	17.97	10.29	24.4	43.59	44.34	down
CsaV3_5G020280	0.4	0	0.46	2.71	4.54	1.26	0	0.6	0.91	0.0020095	0.938686	0.0205556	up-down	0	0	0	0	0	0	0	0	0	others
CsaV3_5G020300	1.11	1.15	0.82	104.01	28.28	13.47	1.75	2.26	1.07	2.4e-14	0.696251	4.66e-06	up-down	25.54	12.7	15.49	1.1	0.27	0.82	0.78	6.44	26.4	down
CsaV3_5G023060	0.17	0	0.38	45.06	27.81	9.44	0	1.79	0.96	5.56e-10	NA	0.000621108	up-down	0.52	5.86	2.55	8.28	6.87	2.23	0	0.12	0.51	others
CsaV3_5G023890	154.85	82.82	70.31	3634.08	1719.31	1990.63	134.07	148.55	107.82	3.66e-26	0.8393	8.6e-36	up-down	324.07	339.26	353.93	348.65	334.16	272.4	73.53	127.22	383.79	others
CsaV3_5G024070	5.36	10.9	6.92	14.88	21.9	13.34	10.63	8.61	8.59	0.0236406	0.892377	0.0291481	up-down	32.04	42.87	31.74	57.18	24.88	37.16	34.44	37.23	27.8	others
CsaV3_5G024260	27.88	28.47	27.48	62.73	48.09	58.37	16.54	26.11	34.24	0.00441153	0.929432	0.0107625	up-down	44.01	46.34	57.97	27.61	35.67	34.98	29.84	40.04	45.21	others
CsaV3_5G025280	1.24	0.79	0.99	8.72	8.88	2.27	1.02	1.57	3.8	7.99e-05	0.468931	0.0391096	up-down	15.65	25.43	28.71	0.14	0.39	0.91	0.4	4.22	25.18	down
CsaV3_5G025790	16.66	13.9	13.49	143.51	83.58	53.25	17.63	18.35	21.54	8.4e-09	0.671366	6.2e-08	up-down	32.74	36.52	56.82	13.81	9.6	10.64	8.91	22.38	49.68	down
CsaV3_5G025930	5.29	3.82	4.33	45.34	16.91	17.92	3.08	5.83	6	6.13e-08	0.951527	1.43e-07	up-down	20.26	23.88	33.12	0.26	1.67	0.77	0.71	3.82	24.25	down
CsaV3_5G026550	4.7	5.76	0	125.84	32.98	14.96	2.11	8.06	8.77	0.0411924	0.869516	0.000178701	up-down	124.33	163.32	196.9	3.5	8.36	1.04	2.7	56.02	353.18	down
CsaV3_5G026570	0.46	0	0	39.09	8.81	10.29	0	0.85	0.97	4.94e-05	NA	3.63e-05	up-down	20.8	35.54	36.06	4.47	5.86	0	0.41	5.92	22.92	others
CsaV3_5G026600	0	0	0	4.3	0.16	0.47	0	0	0	0.0214491	NA	0.0122284	up-down	0	0	0	0	0	0	0	0	0	others
CsaV3_5G026680	147.48	228.47	222.69	289.65	428.94	387.59	68.11	70.05	168.64	0.0456554	0.113941	2.4e-05	up-down	66.8	62.56	88.46	69.55	63.87	43.04	59.02	61.15	96.64	others
CsaV3_5G026710	44.63	61.74	56.01	93.67	93.87	90.1	33.88	35.9	54.35	0.0249595	0.525727	0.000517117	up-down	36.21	41.36	48.37	21.97	26.19	16.27	33.13	35.3	39.66	down
CsaV3_5G026800	1.15	2.32	4.04	33.14	20.49	20.17	3.16	2.15	6.84	2.52e-07	0.85994	2.03e-05	up-down	14.22	12.86	22.06	2.13	7.92	5.89	1.84	8.89	22.26	down
CsaV3_5G026820	26.09	23.55	25.14	46.02	111.37	37.59	12.27	19.03	30.19	0.031691	0.830627	0.00532813	up-down	79.81	39.98	48.8	46.17	35.44	33.96	22.36	25.31	38.75	others
CsaV3_5G026890	60.89	119.61	90.1	172.63	250.69	297.74	67.7	53.35	83.5	0.00388815	0.685769	5.34e-07	up-down	45.02	48.08	50.8	110.13	79.45	88.5	50.55	50.03	54.16	up
CsaV3_5G026900	22.7	30.06	26.53	43.46	48.38	51.82	12.56	19.25	18.29	0.0159868	0.137574	6.52e-06	up-down	8.72	16.41	10.4	14.81	13.64	19.7	16.5	18.65	7.46	others
CsaV3_5G026910	28.24	50.3	39.92	73.34	105.76	78.94	37.9	23.54	50.01	0.00734175	0.955891	0.00408629	up-down	79.07	82.49	96.96	54.9	55.03	60.31	54.91	69.44	131.68	others
CsaV3_5G026930	19.79	21.1	17.61	41.2	47.15	32.19	18.03	18.16	20.39	0.00135592	0.994401	0.000942835	up-down	25.64	21.19	30.1	14.55	14.38	17.31	17.69	21.82	32.23	others
CsaV3_5G026940	1.02	0.58	0.93	3.42	5.96	2	0.87	0.64	1.23	0.00643817	0.992636	0.00587204	up-down	0.53	0.26	0.06	0.95	0.19	0.71	0.13	0.49	0	others
CsaV3_5G027070	1.32	0.64	0.79	46.05	24.45	29.34	2.24	1.66	2.27	5.1e-25	0.455532	5.74e-23	up-down	1.22	1.37	2.04	0.58	1.34	0.76	0.08	0.59	3.92	others
CsaV3_5G027270	10.76	5.93	6.61	31.27	20.48	21.35	7.89	11.82	8.9	6.08e-05	0.878589	0.000132638	up-down	2.67	7.36	7.08	4.87	4.82	5.55	5.77	11.98	5.14	others
CsaV3_5G027330	0.96	1.06	0.41	12.77	7.03	3.06	0.95	1.25	2.19	1.11e-05	0.685769	0.000330215	up-down	22.92	13.27	29.16	0.09	0.51	0.07	0.15	4.27	18.89	down
CsaV3_5G027790	80.18	96.99	95.3	167.79	140.29	182.73	39.49	65.67	52.25	0.0198796	0.039628	2.14e-06	up-down	158.43	126.66	97.01	131.32	204.05	136.08	168.54	140.05	166.75	others
CsaV3_5G027900	5.33	8.75	8.44	32.32	23.74	21.26	7.79	6	7.35	1.32e-06	0.947494	5.01e-09	up-down	6.55	6.11	11.7	1.52	2.17	1.84	4.12	6.1	10.68	down
CsaV3_5G027960	3.07	4.83	2.74	37.7	44.35	20.66	3.6	3.55	4.81	6.39e-15	0.955406	2.43e-17	up-down	33.94	32.4	44.19	2.26	1.02	1.82	2.75	9.55	54.69	down
CsaV3_5G027970	0.65	0.48	0.22	12.89	6.41	4.03	0.26	0.87	0.35	6.79e-11	0.993124	4.3e-11	up-down	5.8	1.34	5.08	0.05	0	0.04	0.11	0.27	5.49	down
CsaV3_5G028000	16.86	12.96	16.44	45.7	32.26	27.51	16.09	19.54	18.25	0.00721918	0.878589	0.0223012	up-down	15.43	13.88	19.85	17.12	14.73	12.92	9.04	11.04	27.99	others
CsaV3_5G028120	28.34	63.71	33.02	142.35	198.35	122.73	33.91	28.17	58.79	9.06e-05	0.979381	1.94e-06	up-down	19.35	35.61	31.27	7.26	12.35	5.41	13.47	23.7	45.67	down
CsaV3_5G028230	0.23	0.13	0.11	1.72	0.53	0.33	0.1	0.13	0.13	0.0298271	NA	0.00657062	up-down	0.44	0.45	0.63	0	0	0.12	0.09	0.13	1.29	down
CsaV3_5G028420	77.87	148.23	217.02	369.32	459.22	371.84	107.24	72.67	95.14	0.0248292	0.61278	1.02e-07	up-down	44.73	42.55	62.34	204.62	98.43	146.08	76.27	81.99	133.27	up
CsaV3_5G028470	2.39	4.3	4.04	9.1	22.35	17.79	2.61	2.24	8.82	0.0037918	0.955406	0.0340716	up-down	10.23	13.82	14.47	7.26	11.28	9.84	7.1	13.03	21.51	others
CsaV3_5G028520	6.11	9.84	9.14	14.74	24.56	22.13	7.7	7.21	9.04	0.00155884	0.985958	0.000145345	up-down	3.06	2.75	6.43	4.15	4.5	4.91	4.52	5.4	6.93	others
CsaV3_5G028820	25.58	47.89	39.84	71.11	98.38	76.92	42.67	34.51	37.91	0.00733698	0.999741	0.000488338	up-down	44.45	46.93	46.22	39.39	42.19	43.75	33.04	44.1	41.16	others
CsaV3_5G028850	0.94	0.34	0.42	2.87	4.03	1.63	0.43	0.09	0.53	0.0208422	NA	0.00218926	up-down	2.23	3.8	6.67	1.82	1.07	0.11	0	0.16	3.12	others
CsaV3_5G028890	6.74	11.78	5.55	293.54	398.21	234.13	10.71	5.39	7.1	9.43e-38	0.990322	3.41e-42	up-down	4.28	8.04	14.75	25.44	8.66	7.65	2.72	6.24	11.96	others
CsaV3_5G029170	22.75	18.47	13.64	103.83	77.44	65.86	24.83	28.19	15.35	3.71e-10	0.843643	1.98e-07	up-down	29.25	32.88	23.64	48.9	44.09	53.32	16.65	14.55	32.03	up
CsaV3_5G029810	10.79	15.89	15.33	23.17	31.79	22.34	13.74	12.84	15.92	0.0447492	0.994632	0.0196777	up-down	10.56	9.05	9.41	3.94	7	4.43	8.36	9.98	13.67	others
CsaV3_5G029990	35.63	41.91	28.77	89.13	85.56	91.86	52.61	44.22	47.04	2.73e-05	0.507537	0.0049296	up-down	37.64	35.89	42.79	34.8	34.56	48.99	41.22	46.59	45.37	others
CsaV3_5G030140	22.32	17.99	17.66	50.04	35.04	37.33	22.01	18.14	22.87	0.0171061	0.969592	0.0221644	up-down	21.56	26.51	16.75	17.18	22.53	20.01	12.89	15.75	18.95	others
CsaV3_5G030180	20.15	18.76	16.96	45.45	42.45	31.05	17.94	17.29	20.12	0.00154454	0.895076	0.000149949	up-down	13.32	12.37	22.22	14.82	11.17	12.34	6.44	12.34	25.73	others
CsaV3_5G030400	1.51	1.8	0.51	25.56	29.87	21.76	1.03	1.28	0.84	2.27e-17	0.962952	3.64e-20	up-down	2.98	5.66	4.16	1.48	13.43	2.68	0.35	0.11	1.39	others
CsaV3_5G030430	0	0	0.2	3.08	3.21	2.59	0.1	0	0.1	9.82e-05	NA	6.3e-05	up-down	0.49	0.63	1.54	0	0.47	0	0.08	0	2.23	others
CsaV3_5G030540	0.99	0.5	0.58	3.99	3.68	2.18	0.57	0.7	0.49	4.68e-05	0.922333	6.85e-08	up-down	10.27	9.07	3.78	5.92	4.97	2.18	2.96	3.75	6.51	others
CsaV3_5G030810	1.26	1.82	0.62	26.93	16.64	7.8	0.18	1.12	3.1	4.46e-09	0.978669	3.51e-06	up-down	27.24	20.56	27.3	0.4	0.65	0.99	1.17	3.34	34.2	down
CsaV3_5G030970	4.88	6.01	5	20.42	12.51	9.3	3.55	5.83	6.07	0.00127951	0.970706	0.000374373	up-down	13.99	13.12	17.58	6.43	6.04	4.5	7.03	8.6	18.22	down
CsaV3_5G031040	16.89	14.21	15.52	104.84	67.79	44.41	13.11	16.29	20.55	4.59e-07	0.979381	3.84e-07	up-down	34.56	38.47	68.12	11.57	11.96	16.19	15.8	25.5	57.48	down
CsaV3_5G031080	4.97	9.74	6.61	14.19	20.21	11.58	2.9	4.34	4.21	0.0464778	0.184781	1.29e-06	up-down	14.66	11.47	15.25	8.39	7.37	4.72	9.58	8.08	24.43	others
CsaV3_5G031280	0.93	1.48	1.46	11.88	11.73	4.6	1	0.95	1.13	1.32e-06	0.911056	1.24e-08	up-down	3.06	3.57	4.11	0.49	1	1.56	0.2	0.95	5.15	down
CsaV3_5G031350	0.13	0	0	2.76	1.15	1.13	0.15	0.25	0	0.00116724	NA	0.00245001	up-down	0	0.05	0.06	0.34	0.31	0	0	0	0.58	others
CsaV3_5G031370	10.69	8.8	8.18	45.92	29.72	18.93	10.61	10.2	10.3	0.00030403	0.938987	0.000199676	up-down	9.79	8.18	7.77	3.1	3.8	3.23	1.81	2.64	12	down
CsaV3_5G031460	11.82	14.91	11.45	37.1	32.04	34.03	14.68	15.24	17.5	0.000219717	0.8393	0.00702507	up-down	27.59	23.31	31.13	11.76	18.86	18.73	20.94	16.87	35.05	others
CsaV3_5G031690	5.19	8.45	7.98	14.27	17.51	12.93	7.06	6.55	8.03	0.00448557	0.990322	0.00264418	up-down	3.31	4.6	5.22	1.4	1.24	1.04	3.77	3.81	4.36	down
CsaV3_5G031880	3.8	7.84	5.6	16.87	26.14	11.39	5.97	4.91	4.65	0.00213435	0.942926	5.06e-05	up-down	9.36	9.36	9.03	4.42	6.3	9.73	3.84	5.45	12.72	others
CsaV3_5G031960	6.3	9.96	9.93	19.09	18.19	13.13	9.78	7.62	10.03	0.0404995	0.987026	0.0321278	up-down	14	9.34	11.3	3.38	6.66	5.2	4.67	6.8	12.6	down
CsaV3_5G032100	12.15	11.92	11.29	31.87	28.81	17.98	12.17	13.59	15.65	0.0096532	0.859573	0.0451672	up-down	11.34	23.86	20.33	7.85	8.64	6.17	5.52	7.5	20.24	down
CsaV3_5G032130	19.94	19.4	17.33	58.33	92.89	66.17	14.15	14.95	14.1	7.83e-10	0.425608	1.21e-15	up-down	82.03	63.75	52.09	95.9	111.67	111.27	52.8	33.97	55.25	up
CsaV3_5G032220	9.91	12.47	8.41	63.24	53.36	31.27	15.25	13.46	8.24	1.3e-08	0.884246	2.87e-06	up-down	4.89	12.48	14.24	2.99	11.82	7.54	2.29	8.8	9.88	others
CsaV3_5G032520	34.81	51.82	46.21	79.92	102.98	75.77	32.57	24.57	38.53	0.0175538	0.448317	2.61e-05	up-down	55.29	57.28	64.88	27.56	46.81	21.26	41.74	60.94	61.97	others
CsaV3_5G032690	56.12	42.18	33.93	97.78	95.53	99.92	28.27	84.61	82.37	0.000427176	0.912717	0.00705274	up-down	16.28	15.58	16.87	18.36	18.87	17.12	15.2	13.47	31.24	others
CsaV3_5G032930	17.23	22.33	11.79	52.53	70.8	35.14	2.82	6.08	11.59	0.00107026	0.106099	1e-08	up-down	80.79	78.9	90.84	98.77	61.81	34.76	15.98	24.02	129.92	others
CsaV3_5G032970	2.23	2.66	2.41	9.29	13.61	5.98	2.15	1.9	2.71	6.17e-05	0.954347	1.07e-05	up-down	6.38	6.49	7.43	4.14	6.52	3.91	3.4	3.16	7.25	others
CsaV3_5G033000	6.94	15.74	8.22	47.1	61.92	43.09	18.76	13	16.07	6.18e-06	0.71523	0.000165072	up-down	51.98	51.21	59.28	136.63	84.56	73.12	43.76	34.26	76.94	up
CsaV3_5G033010	4.39	2.31	1.77	15.14	17.33	4.64	1.7	1.78	1.64	0.00412746	0.50119	6.22e-08	up-down	1.06	0.15	0.56	0.14	0.6	0.05	0.04	0.07	0.41	others
CsaV3_5G033140	11.4	11.21	12.11	19.63	21.53	27.19	8.53	9.99	12.84	0.00562581	0.852668	0.00124621	up-down	13.31	13.64	14.72	15.3	20.94	12.3	11.56	15.15	16.57	others
CsaV3_5G033360	9.48	14.18	14.19	15.45	26.65	23.43	7.43	7.86	10.61	0.0273031	0.36217	0.000152412	up-down	10.9	10.91	9.45	4.24	6.12	8.66	6.97	10.4	14.59	others
CsaV3_5G033380	4.96	4.09	4.22	17.16	13.15	15.34	6.41	4.7	4.2	4.74e-05	0.951028	0.000725986	up-down	3.92	3.94	5.8	6.76	9.22	11.17	4.54	7.22	6.69	up
CsaV3_5G033460	0.19	0.23	0.07	74.85	28.55	19.19	0.15	0.46	0.35	2.81e-25	NA	6.57e-30	up-down	2.43	8.36	3.51	0	0.48	0.25	0.06	0.28	4.86	down
CsaV3_5G033500	11.72	25.05	19.28	37.44	43.57	35.95	19.21	14.84	17.62	0.0196742	0.931748	1.39e-05	up-down	7.85	7.69	4.4	4.28	6.31	6.39	4.6	6.79	6.95	others
CsaV3_5G033610	1.31	5.23	2.5	68.5	35.51	17.24	2.49	1.2	2.55	0.000636836	NA	0.000113131	up-down	81.7	36.28	96.69	10.31	13.71	23.06	18.2	25.92	144.61	down
CsaV3_5G033710	16.36	20.75	15.03	30.94	50.97	29.83	12.48	12.86	11.29	0.0212548	0.349597	2.11e-05	up-down	25.3	24.42	22.02	37.59	46.84	27.48	24.42	23.17	34.81	up
CsaV3_5G033730	0	0	0.1	2.41	1.52	1.3	0	0.17	0.41	0.00131393	NA	0.0129145	up-down	0.34	1.42	0.76	0	0.08	0	0.08	0.08	1.76	others
CsaV3_5G033740	0	0	0	4.73	2.39	0.66	0	0	0	4.74e-05	NA	1.97e-05	up-down	5.49	2.91	6.36	0	0	0	0	0.44	4.62	down
CsaV3_5G033770	2.31	3.57	3.3	7.07	8.55	4.85	2	2.66	3.14	0.0197648	0.913874	0.00466716	up-down	10.58	11.21	10.56	8.89	6.93	7.9	4.28	7.76	11.85	others
CsaV3_5G033840	0	0	0.81	27.07	14.89	12.2	0.41	1.07	1.63	1.33e-05	NA	2.63e-06	up-down	21.64	14.93	48.29	2.42	2.81	1.8	4.39	2.13	10.38	down
CsaV3_5G033980	16.06	20.1	17.78	39.88	38.78	28.05	14.3	15.69	14.98	0.010948	0.713726	4.72e-05	up-down	19.35	18.86	23.28	12.95	12.94	12.33	15.21	18.31	22.1	others
CsaV3_5G034010	32.91	45.1	29.62	245.57	261.14	222.68	14.82	25.71	58.96	1.53e-26	0.958475	5.2e-10	up-down	24.54	36.71	46.92	93.51	52.4	51.53	20.78	39.84	57	up
CsaV3_5G034230	89.24	66.93	65.18	184.82	123.79	130.53	68.43	90.23	75.69	0.0394213	0.983443	0.0305758	up-down	126.15	126	112.16	129.96	157.19	122.99	85.36	92.32	128.68	others
CsaV3_5G034240	76.01	129.11	99.07	249.05	354.75	251.78	159.39	99.65	172.78	9e-05	0.596276	0.0231542	up-down	110.6	115.17	129.95	91.89	127.79	68.53	112.48	122.3	205.54	others
CsaV3_5G034250	16.13	23.66	25.11	254.06	183.94	115.24	33.24	28.51	48.85	1.48e-12	0.436188	4.57e-08	up-down	37.69	32.27	79.96	6.32	9.87	5.9	14.62	26.38	80.81	down
CsaV3_5G034270	5.5	17.86	9.43	19.81	45.4	21.61	19.67	9.44	8.48	0.00914328	0.859182	0.0394831	up-down	4.31	18.74	9.67	23.83	30.22	75.39	3.8	12.14	19.51	up
CsaV3_5G034550	2.79	6.27	5.28	25.08	27.94	10.85	3.34	3.76	8.84	7.17e-05	0.97194	0.000264998	up-down	26.36	16.17	27.01	0	0.72	2.54	4.39	6.47	34.72	down
CsaV3_5G034800	54.22	66.13	59.3	363.01	253.53	287.41	32.48	48.11	65.41	1.32e-18	0.732582	3.15e-15	up-down	31.02	68.12	75.89	38.36	50.68	35.69	52.97	86.25	85.01	others
CsaV3_5G034940	12.93	20.2	12.73	93.51	68.62	37.5	19.48	13.82	16.93	7.83e-06	0.962768	1.97e-06	up-down	87.96	82.88	150.85	14.24	10.72	9.69	22.62	39.88	61.69	down
CsaV3_5G035120	0	0	0	7.29	3.05	1.18	0.18	0	0	0.000122105	NA	0.000622076	up-down	0.85	7.19	0.98	17.72	29.69	2.1	0	0.55	3.48	others
CsaV3_5G035130	44.63	50.95	51.73	124.96	120.84	98.53	56.01	56.17	63.79	2.1e-06	0.690714	0.00092054	up-down	91.64	81.75	81.88	54.01	113.1	77.86	66.43	67.53	114.39	others
CsaV3_5G035760	25.94	22.49	29.01	80.59	64.44	82.38	12.58	30.36	36.59	3.75e-07	0.998735	0.00183689	up-down	27.54	26.55	41.44	8.69	12.67	8.73	16.78	22.48	31.61	down
CsaV3_5G035920	15.18	19.2	13.33	105.73	59.13	47.07	13.82	15.93	26.19	1.16e-06	0.913874	1.45e-05	up-down	20.89	52.9	55.35	23.68	15.96	12.62	26.2	60.09	64.74	down
CsaV3_5G035990	2.84	2.41	1.8	21.2	11.08	7.84	1.66	3.21	3.4	8.57e-06	0.948236	2.83e-05	up-down	2.29	8.18	3.8	1.19	2.96	1.77	1.09	2.6	12.57	others
CsaV3_5G036030	1.35	1.34	0.86	6.57	4.59	2.21	0.79	0.72	1.14	0.0186908	0.886687	0.00186945	up-down	1.75	0.85	2.13	1.55	3.74	0.73	0.54	2.24	1.55	others
CsaV3_5G036490	19.1	23.33	12.15	47.4	41.59	34.51	12.72	12.97	12.09	0.0250738	0.543186	1.28e-07	up-down	29.31	22.13	24.57	35.64	42.93	54.23	29.87	33.01	37.89	up
CsaV3_5G036540	11.63	17.39	14.87	31.98	52.34	31.41	20.29	14.83	17.72	0.000204897	0.806178	0.00449523	up-down	19.43	16.64	14.52	25.54	21.45	29.57	15.03	16.22	22.02	up
CsaV3_5G036860	10.36	25.88	11.24	42.4	52.59	36.8	3.33	9	13.34	0.0393635	0.665147	0.000163534	up-down	221.76	146.11	276.24	21.48	38.88	9.74	18.37	65.73	314.85	down
CsaV3_5G037190	107.63	59.39	52.74	227.47	131.07	153.93	77.96	97.95	80.24	0.044413	0.936679	0.0214922	up-down	200.01	192.97	183.81	136.49	139.63	135.09	95.81	116.87	165.92	others
CsaV3_5G037210	0.16	0	0	3.77	1.03	0.34	0	0	0	0.0355256	NA	0.00752192	up-down	0	0	0	0	0.47	0	0	0	0	others
CsaV3_5G037660	62.79	65.54	61.62	149.85	136.7	125.48	66.19	61.87	67.71	2.06e-05	0.995828	7.01e-05	up-down	61.62	59.79	51.88	52.65	67.22	61.6	41.2	44.18	60.84	others
CsaV3_5G037860	11.86	18.3	15.03	29.97	26.13	29.29	6.52	13.76	9.72	0.0139645	0.449783	0.000292243	up-down	136.78	80.83	82.26	210.59	275.2	199.06	83.72	47.24	90.19	up
CsaV3_5G038130	6.45	6.83	2.57	17.95	19.42	13.72	4.77	6.41	7.3	0.0275221	0.96913	0.0359989	up-down	20.58	19.88	17.15	6.37	7.88	6.34	4.3	17.08	45.92	down
CsaV3_5G038150	58.14	46.95	41.94	112.17	88.58	74.22	41.47	65.1	50.08	0.00251543	0.9826	0.00252345	up-down	37	38.11	38.55	27.2	41.05	41.04	37.62	40.83	43.8	others
CsaV3_5G038200	21.61	31.35	34.71	45.41	57.89	56.14	19.27	19.66	24.06	0.0371008	0.309649	1.84e-06	up-down	20.67	29.65	26	10.43	15.11	16.59	24.56	31.43	26.42	down
CsaV3_5G038390	175.03	213.23	176.22	353.63	460.13	394.73	208.71	162.31	201.78	7.93e-05	0.993124	0.000150816	up-down	72.83	125.84	94.86	61.48	101.82	214.21	132.79	208.52	49.29	others
CsaV3_5G038610	0.69	0.99	0.61	4.9	3.01	2.36	0.9	1.42	0.74	0.000324962	0.879111	0.00662213	up-down	2.82	1.05	1.96	1.1	1.44	1.86	1.18	1.17	3.12	others
CsaV3_5G038720	14.79	13.59	14.49	31.77	30.8	26.77	10.54	13.39	10.18	0.000288076	0.58965	8.02e-06	up-down	19.73	13.44	12.66	30.08	40.65	25.9	11.74	11.57	15.18	up
CsaV3_5G038730	10.53	15.31	13.23	47.08	50.56	33.55	18.07	10.61	18.07	1.61e-07	0.881225	8.43e-05	up-down	82.92	56.4	97.27	13.91	15.26	12.74	27.14	34.29	65	down
CsaV3_5G038770	7.84	6.58	7.54	16.13	21.52	14.99	3.39	4.81	5.79	0.00198396	0.130563	1.61e-07	up-down	0.77	0.26	1.22	0.45	1.07	2.82	2.09	1.24	1.55	others
CsaV3_5G038780	8.78	8.06	6.43	20.88	21.91	17.97	13.13	11.39	8.43	1.95e-05	0.562806	0.0270583	up-down	2.37	2.57	2.09	1.46	2.85	2.3	1.8	1.71	2.73	others
CsaV3_5G038920	9.02	7.18	4.56	26.45	20	16.82	5.93	7.04	7.55	0.0013789	0.981956	1.19e-05	up-down	7.46	14.76	19.96	5.15	4.83	2.62	5.69	18.03	15.95	down
CsaV3_5G039100	119.32	61	60.59	457.64	266.64	317.65	111.32	121.1	87.63	2.8e-06	0.773249	2.69e-06	up-down	188.27	214.17	205.01	317.02	329.45	224.3	105.89	140.19	245.69	up
CsaV3_5G039540	11.71	11.31	10.45	35.34	22.76	36.68	15.34	18.79	14.77	0.000179393	0.352508	0.0439199	up-down	11	9.31	10.18	12.32	12.76	16.67	10.2	10.19	9.28	up
CsaV3_5G039580	30.66	36.7	34.84	65.19	61.15	76.12	30.67	36.27	42.66	0.00163013	0.967102	0.0145896	up-down	29.91	31.5	32.69	21.36	19	27.88	36.48	31.59	38.26	others
CsaV3_5G039610	30.09	18.84	15	379.3	236.69	169.58	17.54	27.01	19.73	1.62e-15	0.990973	8.91e-23	up-down	115.04	90.81	126.32	34.24	46.42	27.29	17.65	35.67	128.14	down
CsaV3_5G039660	16.86	23.36	25.74	36.23	37.87	42.42	15.26	19.6	24.31	0.026801	0.869717	0.00608855	up-down	6.86	9.41	12.52	1.41	2.11	2.05	6.53	11	10.77	down
CsaV3_5G039750	0.11	0	0	2.73	0.8	0.12	0	0	0	0.0150331	NA	0.000430921	up-down	2.54	5.8	5.36	0	0	0	0	0.21	5.36	down
CsaV3_5G040460	28.75	37.81	39.31	53.18	66.47	73.74	24.9	33.66	45.19	0.0226082	0.973092	0.0358113	up-down	24.99	29	34.97	34.03	28.08	29.64	27.45	32.6	35.37	others
CsaV3_6G000120	23.61	18.25	21.68	62.5	49.5	44.42	25.43	22.44	26.43	0.000308957	0.859182	0.00095239	up-down	81.46	68.17	57.64	72.85	94.78	90.33	50.34	55.27	77.01	others
CsaV3_6G000880	140.07	177.88	150.77	307.24	331.27	277.03	149.62	117.05	126.41	0.00544393	0.583733	1.3e-05	up-down	95.62	112.85	171.69	124.44	97.21	118.84	85.01	88	159.87	others
CsaV3_6G000910	0.33	0.19	0.18	5.13	2.3	1.58	0	0.15	0.9	0.0082345	NA	0.0284093	up-down	0	0	0	0.22	1.93	0.5	0	0	0	up
CsaV3_6G000970	110.14	250.97	359.12	953.52	1315.86	1254.47	67.08	52.14	74.89	6.91e-07	3.06e-05	1.92e-70	up-down	19.87	27.78	22.48	42.96	28.18	141.32	19.3	17.51	12.97	up
CsaV3_6G001030	17.65	21.38	20.06	67.14	90.13	58.7	14.2	16.24	28.34	6.14e-07	0.989754	1.46e-05	up-down	9.01	16.62	21.22	2.61	1.77	0.97	19.98	17.07	10.27	down
CsaV3_6G001040	2.22	0.61	0	120.35	77.14	41.95	0	0.41	0	0.00023358	0.831806	2.39e-08	up-down	15.79	21.34	18.43	1.61	2.76	0.09	0	0.25	22.51	down
CsaV3_6G001200	63.77	71.04	55.51	135.19	145.71	118.39	67.59	54.23	73.62	0.000802335	0.999202	0.00140041	up-down	101.34	126.25	102.64	145.03	144.65	123	85.27	81.08	99.34	up
CsaV3_6G001270	0.56	1.37	1.18	6.76	7.47	4.47	0.93	0.84	1.72	1.34e-05	0.979381	3.01e-05	up-down	0.92	3.04	3.61	2.3	1.69	0.91	1.64	4.93	13.47	others
CsaV3_6G001330	9.66	12.04	11.88	34.02	31.8	20.56	10.66	9.55	12.41	0.000418595	0.968734	0.000132638	up-down	23.98	27.14	31.69	15.33	19.23	12.47	13.14	11.44	29.53	others
CsaV3_6G001360	3.54	2.75	2.51	12.94	7.36	5.37	2.75	2.09	3.56	0.012361	0.966963	0.00312148	up-down	3.22	2.35	3.81	0.92	1.3	0.89	2.29	2.22	5.6	down
CsaV3_6G001440	49.66	70.35	63.61	116.43	136.36	101.47	77.49	58.82	65.67	0.0125593	0.945161	0.0439291	up-down	88.58	95.37	97.48	84.19	86.82	76.61	100.1	112.38	106.89	others
CsaV3_6G001840	10.18	10.05	7.1	22.2	21.61	12.5	6.66	6.37	4.6	0.0374521	0.34931	3.34e-05	up-down	9.49	8.41	9.32	6.1	8.27	7.7	5.54	6.76	16.93	others
CsaV3_6G002130	10.39	12.64	22.01	46.63	64.56	60.31	16.95	13.2	23.86	0.000124335	0.942926	0.00024861	up-down	35.8	34.84	32.37	25.81	6.62	9.62	105.27	87.21	8.93	others
CsaV3_6G002400	24.57	24.36	32.05	66.42	49.8	47.25	13.82	16.28	20.58	0.00891162	0.0595361	5.71e-08	up-down	14.56	13.59	16.21	7.17	8.72	5.18	6.64	7.07	21.66	down
CsaV3_6G002780	24.21	24.68	28.24	56.34	69.87	41.07	21.85	23.35	21.3	0.00875514	0.817024	0.000522012	up-down	95.4	91.92	88.02	88.82	113.34	87.43	50.03	42.01	99.78	others
CsaV3_6G002790	0	0	0	14.18	11.27	6.3	0.29	0.12	0	1.73e-09	NA	6.29e-09	up-down	0.21	1.44	1.78	38.41	50.48	12.87	0.51	0.76	0.82	up
CsaV3_6G003000	2.15	0.46	1.13	35.69	6.1	2.19	1.31	1.79	1.56	0.00293736	0.967237	0.000964222	up-down	8.06	26.55	9.86	0.56	1.84	0.42	0.31	0.29	11.85	down
CsaV3_6G003010	0	0.28	0.26	10.29	5.27	0.5	0.53	0	0.26	0.00805299	NA	0.0071336	up-down	6.05	18.4	4.85	0.55	0.15	0	0.3	0.56	10.07	down
CsaV3_6G003430	11.17	10.23	10.57	28.81	21.9	25.98	7.56	16.37	11.97	0.000252654	0.951028	0.0323815	up-down	5.9	8.31	3.98	2.86	8.89	6.33	12.96	16.51	5.06	others
CsaV3_6G003500	49.01	34.47	31.45	67.95	83.69	86.7	40.07	58.32	46.83	0.0123786	0.982346	0.00202866	up-down	22.84	18.78	16.26	20.24	28.89	33.54	15.31	19.24	37.9	others
CsaV3_6G003510	10.74	27.15	35.42	50.87	68.84	62.78	34.44	13.91	19.64	0.030779	0.97194	0.0026744	up-down	79.42	69.71	81.77	55	69.15	75.96	72.3	88.5	70	others
CsaV3_6G003520	39.41	40.9	47.32	84.01	85.76	78.19	44.55	42.27	53.77	0.00199485	0.942926	0.0192243	up-down	48.97	53.66	53	51.77	51.07	43.53	46.45	53.93	54.23	others
CsaV3_6G003570	49.91	72.45	67.76	116.45	131.89	107.04	70.05	43.7	54.5	0.0449927	0.913874	0.0132252	up-down	253.12	226.35	208.44	209.69	256.94	247.92	185.2	174.38	304.48	others
CsaV3_6G003660	3.84	6.94	3.74	50.4	55.65	30.27	4.49	4.37	9.57	2.43e-12	0.963798	1.51e-12	up-down	84.98	50.99	133.79	0	0.66	0.15	0.67	23.53	399.9	down
CsaV3_6G003730	78.81	69.18	73.77	161.1	137.32	114.36	72.29	78.05	61.39	0.000793785	0.804523	0.000137235	up-down	59.71	59.09	60.6	66.68	84.61	73.3	55.12	55.13	57.15	up
CsaV3_6G003960	0	0	0.2	4.89	3.9	3.68	0	0	0.2	0.000353799	NA	0.000290599	up-down	0.93	0.1	0.24	0	0	0	0.13	0	1.39	others
CsaV3_6G004200	28.46	46.53	45	54.74	83.99	65.81	30.67	23.99	40.07	0.0225587	0.491381	0.000819419	up-down	17.52	15.08	17.28	9.88	14.62	11.2	13.6	14.95	20.34	others
CsaV3_6G004230	37.61	34.53	19.74	129.91	111.38	81.49	19.33	27.77	30.75	0.00012681	0.883292	1.23e-07	up-down	79.45	70.8	109.27	71.95	88.78	76.33	21.45	33.38	143.22	others
CsaV3_6G004320	16.1	13.55	7.3	35.04	49.28	24.05	9.21	4.76	8.56	0.0108182	0.543186	1.93e-06	up-down	6.12	9.8	15.55	4.93	11.11	6.44	6.94	5.44	14.46	others
CsaV3_6G004450	13.03	8.3	5.38	77	33.42	27.09	6.92	15.19	4.91	0.000959753	0.999171	0.000945397	up-down	163.45	233.91	128.92	502.55	718.65	371.73	88.75	57.32	288.33	up
CsaV3_6G004600	54.4	68.29	66.19	123.84	131.26	105.83	48.76	47.75	62.31	0.000591405	0.611733	1.19e-05	up-down	16.28	14.35	16.76	6.12	18.99	14.35	5.31	3.59	15.38	others
CsaV3_6G004820	27.75	42.28	49.36	94.98	128.51	144.26	60.17	45.58	81.05	8.6e-05	0.440959	0.03447	up-down	33.24	55.83	81.27	26.45	33.46	47.75	66.2	126.05	67.62	others
CsaV3_6G004840	9.33	13.38	11.26	23.31	23.54	22.92	9.99	10.56	10.52	0.00357729	0.914963	0.000410727	up-down	30.17	24.6	26.65	35.09	37.61	26.17	21.85	21.97	30.23	others
CsaV3_6G005100	0.34	0	0	18.35	9.61	5.62	0	0.08	0.19	1.03e-09	NA	2.29e-10	up-down	2.57	15.7	8.77	2.42	3.25	0.43	0	0.15	4.7	down
CsaV3_6G005380	14.32	4.75	3.1	77.42	30.37	19.59	2.97	6.93	2.92	0.00100623	0.713726	1.17e-08	up-down	108.38	540.36	141.97	67.97	152.41	113.82	15.65	26.92	327.98	others
CsaV3_6G005590	42.09	91.48	91.42	144.78	222.97	141.78	46.25	53.79	36.25	0.0457642	0.396185	5.03e-07	up-down	1298.31	795.13	710.89	1238.78	1322.29	1111.31	491.64	334.84	702.55	others
CsaV3_6G006170	19.21	32.95	30.98	47.51	55.1	64.83	20.82	21.47	33.48	0.0194982	0.922148	0.00244484	up-down	13.22	16.88	21.11	7.06	11.94	11.68	17.62	16.76	14.92	others
CsaV3_6G006210	0.22	0.62	1.36	10.64	20.52	8.14	0.28	0.28	0.37	5.22e-11	NA	2.15e-14	up-down	0.12	0	0.32	0.64	1.27	0.16	0.59	0.11	2.03	others
CsaV3_6G006240	49.26	40.71	43.84	131.2	114.32	95.93	39.7	50.69	49.19	2.07e-05	0.990973	2.71e-05	up-down	62.45	60.78	51.4	88.71	87.17	81.57	45.03	48.82	48.21	up
CsaV3_6G006330	42.7	38.85	35.51	98.8	79.37	75.04	32.72	46.23	47.62	0.000424832	0.968921	0.00443298	up-down	86.16	60.66	45.78	32.04	57.21	33.13	62.54	62.05	93.41	others
CsaV3_6G006400	48.22	146.63	131.46	236.29	384.42	372.38	81.14	62.18	102.34	0.000911829	0.760658	2.11e-12	up-down	189.15	187.57	159.95	357.98	439.7	355.87	237.86	234.78	290.01	up
CsaV3_6G006650	5.1	5.49	2.84	51.39	42.19	18.6	1.38	2.25	3.37	1e-09	0.219068	3.93e-19	up-down	39.59	32.91	77.27	1.01	1.87	0.17	0.78	12.58	82.02	down
CsaV3_6G006970	1.8	0.33	0.19	8.34	8.05	9.35	0.64	3.74	1.3	4.93e-05	0.691589	0.00208812	up-down	1.4	2.4	1.95	18.48	17.1	25.63	7.95	3.98	6.48	up
CsaV3_6G007270	19.15	44.58	47.32	154.87	156.73	90.05	16.77	12.96	36.03	0.00210257	0.667752	9.27e-07	up-down	33.65	57.34	93.4	53.87	58.23	14.71	55.49	47.89	99.73	others
CsaV3_6G007310	14.2	18.73	15.38	30.24	34.44	24.14	16.91	14.55	14.24	0.0160304	0.942926	0.00636547	up-down	15.07	13.06	8.42	9.93	14.57	15.08	8.6	7.1	12.38	others
CsaV3_6G007510	7.4	9.72	12.12	16.61	22.45	21.7	5.06	6.62	9.8	0.0177125	0.650964	0.000299664	up-down	5.55	6.86	7.63	3.81	4.14	4.86	4.28	5.24	6.49	others
CsaV3_6G007920	79.14	105.2	99.31	263.76	164.72	140.5	90.3	96.29	78.68	0.0414568	0.929432	0.0109041	up-down	636.36	377.79	408.36	448.06	656.07	343.83	404.64	302.78	486.98	others
CsaV3_6G007970	34.68	65.81	47.14	85.68	146.56	102.34	42.84	26.14	39.99	0.0102361	0.601745	7.76e-06	up-down	24.37	26.46	43.1	18.7	18.79	13.54	25.8	23.87	25.42	others
CsaV3_6G008100	0.14	0	0	17.1	12.7	10.06	0	0	0.08	7.98e-11	NA	8.48e-11	up-down	0.56	0.11	0.63	0.25	0	0	0	0	0	others
CsaV3_6G008110	1.42	0.79	0.62	170.09	79.88	95.69	1.52	2.07	2.33	9.98e-41	0.611733	3.31e-45	up-down	6.72	7.21	11.16	2.72	3.05	1.9	0.56	0.44	10.6	down
CsaV3_6G008140	40.48	49.23	37.91	106.78	155.48	84.15	37.05	33.91	41.32	0.000184231	0.789231	1.08e-06	up-down	115.99	114.51	145.42	30.05	38.96	43.57	32.56	72.87	165.97	down
CsaV3_6G008250	15.46	13.99	13.92	29.79	25.89	24.27	12.14	15.07	12.91	0.00576252	0.881908	0.00192169	up-down	11.23	11.93	11.28	5.69	9.47	5.81	5.29	10.09	14.45	others
CsaV3_6G008360	3.23	3.61	2.77	7.42	7.51	5.99	3.09	2.58	3.17	0.0223721	0.845032	0.00130876	up-down	5.46	7.81	4.96	9.2	8.84	10.85	4.77	7.55	3.92	up
CsaV3_6G008460	52.42	89.84	70	170.85	238.13	105.52	60.47	42	58.43	0.0112436	0.552769	1.97e-05	up-down	38.24	39.6	58.6	15.63	14.77	19.5	29.78	44.28	78.41	down
CsaV3_6G008510	46.66	35.08	31.07	178.48	124.58	164.26	26.46	37.42	34.94	1.02e-08	0.880146	3e-12	up-down	11.08	18.76	23.71	24.1	31.5	36.83	63.22	78.64	15.91	up
CsaV3_6G008630	5.39	7.18	6.14	14.71	18	11.16	3.69	4.4	6.72	0.00364812	0.611567	6.8e-05	up-down	9.35	9.32	9.48	2.93	4.58	5.27	4.77	4.69	8.11	down
CsaV3_6G009050	16.7	16.78	14.93	33.97	30.67	34.22	21.66	19.58	20.03	0.000198647	0.584748	0.0471927	up-down	7.95	9.93	11.91	15.53	14.88	15.79	8.53	12.66	11.55	up
CsaV3_6G009220	82.5	89.42	80.43	218.56	233.06	199.41	93.83	81.76	109.58	6.87e-09	0.896531	1.8e-05	up-down	158.73	198.07	238.13	77.51	95.05	98.87	114.77	160.64	206.67	down
CsaV3_6G009290	0.47	2.54	2.21	19.98	12.97	9.09	1.17	1.97	3.03	4.95e-06	0.963561	5.39e-08	up-down	5.56	6.79	10.53	1.41	1.46	0.44	2.01	6.86	11.95	down
CsaV3_6G009330	133.57	148.64	169.79	441.71	517.29	476.58	145.37	179.28	195.19	2.04e-10	0.880766	8.12e-08	up-down	141.47	507.16	141.23	355.64	694.43	181.47	174.14	184.15	214.02	others
CsaV3_6G009470	18.95	16.74	17.71	70.28	45.2	34.62	16.92	18.8	22.81	0.000759303	0.952748	0.00111624	up-down	31.22	22.55	30.2	18.37	20.07	17.81	11.57	15.2	37.54	others
CsaV3_6G012340	0	0	0	17	14.02	4.96	0	0.29	0.17	1.16e-08	NA	6.16e-08	up-down	0	0	0	0.43	1.04	0.16	0	0.22	0	others
CsaV3_6G012660	0.21	0.26	0	5.57	1.3	0.93	0.12	0.15	0.18	0.0011197	NA	0.000107178	up-down	0.71	7.8	4.72	0	0	0	0	0.25	2.83	down
CsaV3_6G012770	15.94	14.91	18.27	37.69	32.36	30.85	15.59	19.33	18.64	0.00150957	0.950552	0.00952964	up-down	12.66	11.44	9.96	8.78	11.61	8.23	6.92	5.7	12.92	others
CsaV3_6G013150	76.93	36.06	36.27	218.05	118.82	143.83	51.32	80.64	59.24	0.00357729	0.862945	0.00212177	up-down	30.25	128.88	113.34	15.97	31.21	13.95	23.11	71.31	48.39	down
CsaV3_6G013170	109.64	139.96	129.61	355.66	433.02	351.28	143.7	110.75	149.84	1.73e-09	0.989754	1.19e-07	up-down	98.85	101.74	101.58	192.42	173.57	144.64	72.38	81.94	93.16	up
CsaV3_6G013210	2.95	2.64	2.41	36.27	74.42	39.58	0.98	0.95	4.09	7.68e-21	0.90374	1.56e-17	up-down	89.63	61.57	139.08	14.48	23.25	12.93	22.29	76.73	104	down
CsaV3_6G013530	47.72	45.82	55.29	94.77	83.2	75.48	30.95	37.49	48.75	0.0376918	0.522437	0.000862528	up-down	28.47	30.19	31.18	15.38	25.03	16.57	19.46	27.29	36.83	others
CsaV3_6G013770	9.91	11.58	13.38	27.97	33.72	24.78	11.7	11.63	11.52	5.41e-05	0.999171	3.34e-05	up-down	45.03	26.47	32.44	64.3	112.09	77.45	37.95	28.71	83.93	up
CsaV3_6G014290	16.77	27.93	34.35	47.86	54.1	51.8	11.13	13.84	17.12	0.0445334	0.0707531	1.52e-10	up-down	0.85	1.63	3.35	4.64	3.81	5.15	6.86	9.92	1.93	up
CsaV3_6G014460	14.5	12.27	15.38	32.43	28.13	21.04	13.33	16.18	14.54	0.0147014	0.98047	0.0168711	up-down	6.54	10.54	14.18	10.21	7.67	8.84	7.72	8.87	12.46	others
CsaV3_6G014600	11.96	9.08	7.08	25.01	23.97	19.76	12.84	13.66	10.51	3.95e-06	0.519228	0.00607332	up-down	7.53	10.27	9.96	9.04	12.38	16.39	4.45	7.42	10.6	others
CsaV3_6G014680	60.69	104.74	79.52	329.91	338.7	214.59	166.12	119.17	91.96	6.31e-07	0.445295	0.0049142	up-down	88.27	113.13	112.9	64.16	65.37	128.91	99.78	111.88	173.66	others
CsaV3_6G015180	1.6	1.5	1.29	56.43	33.19	27.01	1.5	1.48	1.71	1.03e-39	0.98731	2.53e-43	up-down	10.67	6.7	16.92	1.05	0.05	0.72	0.19	3.55	20.21	down
CsaV3_6G015290	0.58	1.27	1.2	16.41	12.67	13.45	0.6	0	2.42	0.000361117	NA	0.000813918	up-down	10.78	6.14	10.25	16.66	8.16	12.12	3.14	3.55	7.15	others
CsaV3_6G015300	387.84	257.66	230.27	1497.31	850.5	1120.07	302.96	329.1	260.37	2.72e-07	0.998717	1.01e-09	up-down	1343.96	985.63	935.04	1791.93	2014.79	1594.05	730.28	605.52	1193.26	up
CsaV3_6G015670	19.1	23.53	23.79	38.16	43.1	34.93	14.45	22.3	19.35	0.0145697	0.779836	0.00507952	up-down	16.04	15.81	11.77	4.84	14.31	12.37	10.12	16.71	16.35	others
CsaV3_6G015780	12.48	10.2	10.38	21.46	23.6	18.21	10.74	11.05	11.06	0.0269211	0.979381	0.00946627	up-down	10.11	8.85	6.6	18.67	20.15	18.08	9.65	13.38	16.19	up
CsaV3_6G016080	75.98	88.11	94.28	127.08	123.63	114.12	77.87	88.89	79.08	0.30235	0.932393	0.191475	up-down	161.99	119.77	98.37	125.17	118.29	150.42	117.81	90.49	104.09	others
CsaV3_6G016090	10.56	12.54	11.48	61.52	75.89	33.5	1.2	3.63	3.72	4.31e-09	5.96e-05	3.22e-21	up-down	11.46	20.22	36.09	40.83	74.18	6.15	15.5	24.99	29.56	others
CsaV3_6G016110	0.82	0.75	0.63	2.52	5.32	2.27	0.72	0.51	0.5	0.0316545	NA	0.00869644	up-down	0.11	0.43	0.1	0	0	0.15	0	0.1	0	others
CsaV3_6G016180	50.25	52.02	53.94	179.43	146.79	128.12	34.47	42.02	49.81	1.35e-08	0.527651	1.2e-10	up-down	29.34	34.28	51.56	19.86	24.35	14.75	23.34	30.72	41.29	others
CsaV3_6G016290	240.33	238.25	289.95	492.35	406.05	589.9	130.5	203.14	258.23	0.0139025	0.607658	0.000768963	up-down	278.63	204.29	279.38	422.74	422.49	322.58	239.46	224.28	234.98	up
CsaV3_6G016700	28.6	28.98	29.2	55.75	50.5	47.87	28.44	28.99	31.21	0.00766474	0.996651	0.0122331	up-down	23.82	23.74	23.78	28.12	25.86	22.18	23.46	24.63	21.64	others
CsaV3_6G016730	4.05	2.73	2.82	21.34	9.29	11.18	3.04	4.36	4.78	0.000135719	0.87407	0.000530782	up-down	5.3	4.8	12.57	1.62	0.88	1.37	0.54	4.65	11.54	down
CsaV3_6G016800	20.38	33.97	30.07	123.05	143.13	126.26	29.06	25.03	36.3	1.23e-15	0.973496	2.53e-17	up-down	38.51	44.93	32.13	36.77	58.95	39.64	34.53	39.42	34.56	others
CsaV3_6G016920	43.49	31.24	32.42	117.47	99.23	72.33	47.85	52.1	37.58	4.88e-06	0.662768	0.000869038	up-down	46.96	49.62	42.95	99.05	76.37	70.82	36.53	41.39	41.99	up
CsaV3_6G017280	5.84	5.24	5.76	13.94	12.7	10.94	7.87	7.06	6.54	0.000381129	0.651869	0.0367958	up-down	6.35	4.83	4.42	5.05	5.94	5.08	4.03	4.5	4.9	others
CsaV3_6G018860	78.6	115.06	139.37	188.15	217.03	320.52	60.15	102.45	163.89	0.019897	0.981422	0.0321987	up-down	295.95	228.98	220.45	343.49	386.62	325.01	207.68	199.32	257.26	up
CsaV3_6G018900	13.45	17.17	17.46	43.15	49.85	30.84	14.17	15.23	17.18	0.00815774	0.990261	0.00409851	up-down	0.61	2.11	0.75	0.41	2.8	1.32	0.45	2.16	0.7	others
CsaV3_6G019100	42.78	76.92	63.94	231.29	273.9	180.47	23.06	32.77	39.77	1.29e-08	0.0262169	1.03e-21	up-down	178.79	154.24	210.81	96.31	142.22	99.41	74.17	87.08	136.69	others
CsaV3_6G021510	16.51	11.82	16.84	27.08	32.98	29.95	6.93	9.82	16.8	0.00501009	0.796265	0.00326003	up-down	11.1	21.85	22.24	45.61	41.43	19.02	19.45	17.64	25.34	up
CsaV3_6G021700	160.41	114.41	107.05	459.54	341.43	397.21	140.17	157.54	146.01	3.94e-06	0.889806	3.75e-07	up-down	212.98	232.06	225.32	280.12	305.44	209.79	150.22	169.55	187.72	others
CsaV3_6G022020	4.01	5.93	4.41	13.62	18.36	11.05	8.69	4.36	6.22	0.000169669	0.787549	0.0230837	up-down	7.92	4.14	5.58	12.2	8.42	11.48	4.85	3.98	8.52	up
CsaV3_6G022190	0	0.45	0.84	21.48	10.19	4.51	0	0.37	0.85	0.00055582	NA	0.000278228	up-down	6.16	7.9	7.28	3.52	3.44	6.04	1.17	1.63	21.4	others
CsaV3_6G022480	29.41	34.98	23.35	96.09	148.33	115.43	10.22	19.55	16.87	3.06e-10	0.0520678	7.77e-19	up-down	11.36	20.47	18.69	24.7	37.19	37.68	25.74	57.56	6.03	up
CsaV3_6G022620	134.38	311.93	248.92	367.47	716.59	541.54	117.41	129.56	233.91	0.0352016	0.537308	1.83e-05	up-down	404.11	385.07	553.13	343.35	432.76	253.69	438.82	378.01	608.42	others
CsaV3_6G022660	16.42	16.98	12.79	47.21	38.99	36.17	22.92	23.65	15.69	2.64e-05	0.640496	0.021658	up-down	15.07	10.97	14.71	19	15.83	20.44	15.95	14.52	17.78	up
CsaV3_6G022710	3.98	3.17	1.89	13.5	8.31	11.61	2.91	3.47	2.94	0.00127503	0.999299	0.000228548	up-down	2.7	8.62	10.81	5.44	6.45	10.7	2.28	15.57	7.97	others
CsaV3_6G023820	4.45	0	2.01	629.38	374.18	223.9	0	10.09	4.14	4.93e-13	NA	2.35e-17	up-down	354.24	200.94	491.08	5.25	11.39	6.09	2.57	23.04	510.03	down
CsaV3_6G023850	13.82	47.55	29.28	67.86	93.86	62.12	14.66	16.78	31.58	0.0441933	0.74326	1.24e-05	up-down	53.3	33.98	80.92	5.42	7.29	5.09	17.42	25.88	84.58	down
CsaV3_6G030910	42.36	27.1	22.07	756.29	932.28	390.8	30.61	29.23	76.87	1.03e-23	0.796352	4.82e-19	up-down	2018.9	1629.99	2451.96	23.09	28	17.77	34.3	376.91	3599.61	down
CsaV3_6G030930	15.1	25.09	23.12	50.49	80.35	37.06	21.36	15.05	23.6	0.00349477	0.954406	0.00040913	up-down	39.13	38.73	37.68	10.45	16.25	18.51	20.06	26.64	34.54	down
CsaV3_6G031210	21.37	33.41	30.56	112.87	162.19	80.45	21.38	19.12	29.02	8.62e-08	0.773811	1.52e-12	up-down	33.9	38.9	34.01	21.45	29.4	17.15	17.14	20.44	49.06	others
CsaV3_6G031430	0.99	1.21	1.13	4.23	5.95	3.62	0.84	0.99	1.31	8.99e-05	0.976619	7.25e-05	up-down	1.75	4.18	3.98	0	0.27	0.22	0.28	0.87	3.73	down
CsaV3_6G031480	65.42	110.16	106.45	224.68	225.9	188.18	54.17	63.25	104.89	0.00100371	0.732262	1.46e-05	up-down	39.35	43.47	44.61	9.92	7.86	3.76	16.96	27.04	51.34	down
CsaV3_6G031560	126.52	297.24	259.21	430.07	894.2	789.95	298.19	86.8	258.52	0.0481171	0.983306	0.0329127	up-down	529.48	564.13	557.91	843.56	917.7	591.97	305.05	415.54	566.56	up
CsaV3_6G031690	11.45	6.04	4.74	67.17	58.4	33.15	4.84	8.48	12.84	1.46e-07	0.967102	5.74e-08	up-down	70.86	202.06	362.42	4.32	7.87	1.71	5.47	84.17	226.35	down
CsaV3_6G031720	340.61	206.94	200.7	1037.72	578.45	459.15	196.03	246.98	194.12	0.00837254	0.838089	3.38e-05	up-down	68.01	81.1	53.43	339.95	553.57	163.63	86.43	105.37	127.76	up
CsaV3_6G032040	0.14	0.09	0	5.04	3.17	1.22	0	0	0	3.81e-05	NA	5.04e-07	up-down	6.89	7.32	28.14	0	0	0	0	3.91	22.16	down
CsaV3_6G032060	2.51	5.74	1.2	138.74	94.12	39.45	2.24	5.59	13.04	2.5e-14	0.578884	1.25e-09	up-down	66.35	23.65	100.36	0.93	0.42	0.7	1.8	14.93	55.28	down
CsaV3_6G032100	0	0	0	29.74	25.34	8.71	0.99	0	1	6.27e-05	NA	0.00118551	up-down	26.05	9.14	34.45	0	0	0.36	0.8	10.62	46.52	down
CsaV3_6G032330	84.53	59.89	58.84	245.79	185.01	180.34	82.27	85.4	62.58	2.01e-05	0.939304	2.38e-05	up-down	239.61	223.23	191.31	346.71	350.25	312.08	132.86	162.59	206.25	up
CsaV3_6G032400	5.56	6	3.42	16.68	19.62	9.01	3.28	4.12	4.2	0.00690601	0.818256	6.26e-05	up-down	8.89	4.37	6.57	3.54	4.54	3.84	3.46	2.81	10.48	others
CsaV3_6G032510	13.33	21.25	23.28	74.5	41.07	37.63	26.02	15.77	19.94	0.00555814	0.977839	0.00494112	up-down	1.79	0.39	1.09	0.45	6.6	0.85	0.13	0.29	0.67	others
CsaV3_6G032520	7.43	12.9	10.71	25.6	26.57	21.47	12.57	11.2	14.06	0.0020832	0.847644	0.0135864	up-down	2.3	2.85	0.87	0.16	1.36	7.13	1.39	2.01	6.55	others
CsaV3_6G033950	0	0	0	15.3	17.01	8	0	0	0	0.0218673	NA	0.0200221	up-down	18.42	3.78	6.18	1.17	0	0	0.64	0.3	9.82	down
CsaV3_6G034220	154.47	82.73	74.78	665.8	330.66	448.67	121.55	159.6	120.81	2.91e-10	0.907654	1.33e-13	up-down	189.34	217.42	209.61	378.37	404.13	297.09	97.9	146.67	200.1	up
CsaV3_6G034250	51.85	61.36	45.18	260.77	292.8	166.97	40.49	32	37.15	6.05e-11	0.202474	5.28e-20	up-down	84.09	73.19	114.68	36.34	38.72	32.61	34	51.67	81.02	down
CsaV3_6G034410	23.32	32.43	29.9	72.81	87.54	51.33	23.29	21.53	31.06	0.00280291	0.839836	5.48e-05	up-down	45	40.49	67.49	23.96	25.45	20.61	29.35	30.97	72.4	down
CsaV3_6G035640	0.52	0.13	0.35	12.47	2.88	2.39	0.36	0.5	0.35	0.000190829	NA	7.07e-05	up-down	12.47	23.58	26.12	0	0	0.37	0.36	3.13	36.01	down
CsaV3_6G035740	0.64	0.49	0.53	6.19	8.33	2.83	0.54	0.82	0.71	2.04e-10	0.869516	4.68e-09	up-down	2.73	1.97	0.81	2.15	6.27	6.01	0.74	0	0	others
CsaV3_6G035750	10.9	14.13	10.72	24.01	25.44	22.53	12.03	14.53	10.41	0.000636303	0.988655	0.00893845	up-down	5.84	6.15	4.24	7.89	6.03	6.91	4.61	4.76	5.82	others
CsaV3_6G035820	1.33	1.47	0.12	395.3	116.11	62.8	0.76	2.72	0.62	1.26e-09	0.942926	3.31e-10	up-down	46.09	41.28	79.56	3.08	1.12	0.89	0.57	10.55	156.48	down
CsaV3_6G036010	18.73	11.01	17.85	38.22	26.6	36.95	10.8	16.26	17.35	0.035279	0.943534	0.00311941	up-down	9.04	11.4	10.52	9.74	13.16	13.34	10.27	11.22	15.49	others
CsaV3_6G036250	174.82	156.55	142.08	420.77	315.51	268.31	151.12	159.9	203.19	0.00589398	0.959392	0.00973274	up-down	184.52	167.24	185.6	130.41	134.79	101.94	105.75	135.64	183.99	others
CsaV3_6G036520	0.58	0.92	0.47	3.42	5.81	2.42	0.49	0.43	0.75	4.36e-05	0.945669	2.59e-06	up-down	1.91	2.04	2.46	0.16	0.38	0.18	0.61	1.45	4.21	down
CsaV3_6G036600	18.39	24.04	17.88	44.27	49.57	28.9	15.22	10.53	19.84	0.0258496	0.601745	0.000513002	up-down	44.42	36.73	55.32	5.09	10.11	8.99	10.94	19.86	57.2	down
CsaV3_6G036940	0.89	0	0.47	14.03	3.6	3.18	0	1.65	0.47	0.0196742	NA	0.0371213	up-down	31.11	58.91	21.14	8.82	8.18	4.11	2.64	2.26	69.76	down
CsaV3_6G037050	4.3	7.25	4.51	13.09	15.26	13.74	4.6	4.53	4.52	0.000735307	0.830627	3.62e-06	up-down	11.21	4.9	4.77	2.84	4.62	3.53	3.13	1.46	2.08	others
CsaV3_6G037650	0.79	0	1.1	8.34	3.65	4.05	0.45	0.38	1.73	0.0039729	NA	0.00657435	up-down	3.11	5.53	5.95	0.75	0.54	0	0.14	2.19	8.64	down
CsaV3_6G037780	27.59	14.75	7.55	130.79	91.6	37.95	19.75	21.69	14.49	0.000990028	0.975108	1.19e-05	up-down	9.52	8.78	13.09	5.63	4.63	3.79	4.91	9.41	7.18	others
CsaV3_6G038140	0.43	0.23	0.16	3.76	1.7	0.84	0.06	0.27	0.27	0.00400026	NA	0.000560528	up-down	1.3	2.33	4.24	0	0.29	0	0.05	0.41	3.24	down
CsaV3_6G038210	5.52	1.91	1.35	22.47	8.61	3.99	0.8	1.45	1.23	0.0282949	0.299919	1.03e-07	up-down	13.23	33.95	42.67	1.82	6.74	2.64	1.06	9.07	15.3	down
CsaV3_6G038790	8.77	9.27	9.11	23.95	18.81	21.61	7.83	9.84	7.64	1.16e-05	0.922148	2.97e-05	up-down	2.42	2.9	2.05	2.28	3.2	2.22	0.79	1.55	2.11	others
CsaV3_6G038810	12.84	12.38	11.08	23.12	27.09	33.37	6.05	12.78	17.32	0.00234794	0.989423	0.0292687	up-down	20.61	21.13	28.57	15.33	16.79	13.02	20.01	21.55	14.45	others
CsaV3_6G038870	4.3	7.3	7.56	13.02	19.89	13.12	9.4	7.18	7.39	0.00643817	0.822195	0.040937	up-down	8.84	7.18	6.51	5.13	6.44	6.87	5.4	8.04	8.42	others
CsaV3_6G039140	6.99	11.9	8.11	26.54	38.46	25.22	5.56	4.66	5.53	1.94e-05	0.124377	3.55e-15	up-down	15.47	10.7	25.41	12.39	10.9	6.93	12.6	14.72	31.28	others
CsaV3_6G039680	0.52	0.27	0.11	12.82	1.94	1.53	0.37	0.67	0.15	7.94e-05	0.94549	7.34e-05	up-down	3.72	7.84	9.2	0	0.4	0	0.04	0.92	5.01	down
CsaV3_6G039690	1.41	0.63	0	38.4	10.17	5.75	0.3	2.57	1.12	0.0253155	0.859182	0.00684629	up-down	6.8	6.46	13.37	0.65	0.09	0	0	2.32	12.32	down
CsaV3_6G039700	0.51	0.1	0.15	13.57	4.43	1.97	1.2	2.19	2.13	1.09e-06	0.00417399	0.026003	up-down	2.9	1.94	5.11	0	0	0	0.04	1.73	6.66	down
CsaV3_6G039710	0.61	0.11	0.05	13.17	6.08	1.77	0.1	0.95	0.64	5.71e-06	0.831806	2.42e-05	up-down	3.6	2.75	5.48	0.08	0.04	0.12	0	0.8	3.59	down
CsaV3_6G039720	1	0.11	0.25	42.19	9.23	9.16	0.2	0.37	0.2	6.73e-05	0.852668	1.28e-18	up-down	6.36	11.19	18.8	0.57	0.18	0.06	0	1.05	11.86	down
CsaV3_6G039800	4.64	4.39	4.99	27.1	14.79	12.95	3.84	5.49	6.43	9.39e-06	0.944209	5.16e-05	up-down	10.81	7.73	12.98	1.69	1.54	0.85	1.86	3.77	13.6	down
CsaV3_6G039810	3.01	4.73	2.89	11.86	18.8	6.51	2.16	2.21	4.33	0.00150654	0.824982	2.6e-05	up-down	5.19	12.86	9.28	3.18	5.54	3.24	1.66	10.05	17.77	others
CsaV3_6G039820	2.28	1.81	1.95	12.58	26.04	10.12	3.44	1.2	5.49	1.92e-05	0.846732	0.00250487	up-down	8.45	16.3	15.82	3.61	7.38	3.93	3.68	9.68	17.48	others
CsaV3_6G039850	94.42	49.06	62.19	300	209.69	212.98	51.89	92.11	59.7	4.93e-05	0.984762	1.25e-06	up-down	59.48	61.67	52.24	99.57	114.94	77.03	41.83	43.01	51.71	up
CsaV3_6G039900	38.43	72.46	55.83	307.44	323.69	187.46	36.01	49.45	81.14	7.39e-10	0.990973	3.05e-09	up-down	121.05	132.72	206.36	10.71	9.63	4.41	15.27	51.78	253.97	down
CsaV3_6G040110	8.48	9.07	7.87	29.6	26.72	22.64	12.4	13.23	10.13	9.77e-10	0.400016	0.000576427	up-down	7.6	7.49	6.89	8.09	8.85	11.61	8.05	5.69	8.57	others
CsaV3_6G040190	3.12	2.9	2.93	18.82	12.6	6.61	4.51	3.67	3.83	0.000227851	0.774802	0.00241393	up-down	5.22	2.46	3.95	3.44	1.54	1.24	1.64	2.8	8.77	others
CsaV3_6G040240	45.11	38.14	32.94	77.4	79.44	82.99	25.17	38.81	37.27	0.000561911	0.777406	1.06e-05	up-down	40.1	39.9	48.72	32.47	42.61	49.32	37.87	42.44	41.62	others
CsaV3_6G040470	0.41	0.14	0.2	1.97	1.55	1.42	0.25	0.31	0.31	2.33e-05	0.977839	2.19e-06	up-down	0.29	0.75	0.54	0	0.19	0.21	0.09	0	0.32	others
CsaV3_6G040710	3.82	4.77	4.84	16.8	15.7	7.39	4.14	2.62	5.08	0.00433369	0.914436	0.000814753	up-down	9.71	18.11	22.98	3.04	1.54	2.42	1.68	9.04	18.7	down
CsaV3_6G040920	3.27	3.44	2.44	12.41	11.86	8.21	2.96	2.98	3.22	4.45e-05	0.995406	1.7e-05	up-down	6.93	8.23	8.69	5.22	11.2	11.1	8.58	10.25	6.41	others
CsaV3_6G040990	7.72	4.82	4.53	38.08	18.79	16.73	5.51	8.01	6.82	0.00383936	0.958977	0.00712738	up-down	10.04	5.17	7.51	3.99	3.94	2.44	3.21	5.78	11.17	others
CsaV3_6G041620	49.41	48.63	51.31	112.56	92.6	79.13	44.26	47.41	50.8	0.00948854	0.918513	0.00244592	up-down	61.22	44.81	53.22	13.96	20.72	16.97	29.63	33.02	54.87	down
CsaV3_6G041640	11.76	15.75	12.77	50.98	53.04	40.91	15.72	14.51	19.38	3.17e-11	0.775066	9.63e-08	up-down	18.18	17.14	15.12	11.44	23.7	18.09	15.31	13.66	22.6	others
CsaV3_6G041950	7.33	6.56	2.38	52.63	33.53	13.53	6.62	9.32	3.94	0.000253288	0.942926	0.000140376	up-down	12.45	7.73	10.32	2.08	4.08	6.2	4.06	5.83	6.91	down
CsaV3_6G042180	10.58	13.18	10.41	31.23	24.12	23.68	14.27	13.29	14.85	0.00235	0.791138	0.0364152	up-down	39.76	37.65	50.32	17.57	28.9	23.38	16.93	16.18	59.08	others
CsaV3_6G042280	1.81	5.73	2.82	153.59	63.25	34.67	1.15	3.16	5.08	2.91e-11	0.978037	1.34e-13	up-down	86.62	27.92	84.42	0	1.1	0	0.16	14.96	191.36	down
CsaV3_6G042310	5.91	11.95	8.62	26.98	37.53	21.95	8.64	6.34	11.21	6.95e-05	0.986265	2.67e-06	up-down	6.5	5.61	13.2	0.07	0.61	0.21	0.85	3.12	11.61	down
CsaV3_6G042480	0.11	0.41	0.26	2.74	3.01	2.35	0.26	0.54	1.02	0.00139868	NA	0.0307601	up-down	0	0.91	0.27	0.88	1.33	2.62	0.68	0.09	0	others
CsaV3_6G042580	4.92	4.48	5.56	17.82	12.58	10.37	5.14	5.51	7.07	0.000885708	0.884797	0.00623708	up-down	4.99	4.17	5.32	1.44	2.99	2.08	1.99	3.01	6.81	others
CsaV3_6G042600	71.49	77.06	90.63	149.15	147.9	163.5	65.43	76.06	100.96	0.00932116	0.943131	0.00279527	up-down	85.11	71	64.18	82.24	85.98	68.35	96.26	74.21	74.11	others
CsaV3_6G042900	17.55	24.68	24.18	34.93	42.26	44.89	21.24	21.51	22.83	0.0175272	0.983791	0.00494822	up-down	9.93	8.29	8.99	8.57	9.43	9.72	7	7.51	13.23	others
CsaV3_6G043080	1.97	1.74	1.58	6.22	7.49	3.04	2.29	2.03	2.43	0.00246579	0.788125	0.0155379	up-down	0.51	0.81	0.53	0.15	0.28	0.22	0.04	0.42	1.15	others
CsaV3_6G043240	2.46	2.3	2.14	27.08	15.68	8.42	1.41	0.91	1.22	5.16e-06	0.569938	1.01e-09	up-down	6.6	12.68	12	1.98	5.71	0.15	1.09	2.54	11.04	others
CsaV3_6G043280	64.05	50.58	38.21	120.66	180.13	131.92	47.6	38.8	41.93	0.000274949	0.725124	4.7e-09	up-down	8.26	13.39	22.52	13.35	14.58	21.95	11.09	36.03	10.1	others
CsaV3_6G043450	13.39	9.01	11.11	77.44	36.9	30.69	8.45	12.29	13.3	0.000100915	0.994401	1.96e-05	up-down	14.24	12.84	16.58	12.72	11.15	3.65	2.27	10.95	14.62	others
CsaV3_6G043630	130.59	95.55	72.03	1160.45	631.78	622.56	107.04	184.3	224.72	1.24e-12	0.318748	6.81e-08	up-down	167.46	409.87	281.82	57.6	115.02	64.56	304.06	309.74	145.29	down
CsaV3_6G043650	10.15	9.28	6.11	152.85	57.29	32.04	6.2	4.97	3.63	3.07e-07	0.274105	1.39e-13	up-down	11.76	20.9	29.23	1.04	0.88	0	0.64	3.07	13	down
CsaV3_6G043710	0.32	0.26	0.25	6.55	8.34	3.3	0.25	0.26	0.18	6.45e-11	NA	5.58e-12	up-down	0	0.17	0.05	0	0.69	0.37	0	0	0	others
CsaV3_6G043930	17.4	17.31	10.5	56.35	70.38	39.23	9.71	18.21	14.65	1.56e-05	0.966963	1.61e-06	up-down	178.31	223	251.6	79.22	46.81	29.87	81.19	152.61	278.72	down
CsaV3_6G044270	1.74	2.55	2.45	8.47	10.3	9.67	2.68	2.18	2.2	2.6e-07	0.990973	1.1e-06	up-down	8.81	18.87	13.43	1.33	2.36	2.53	4.61	9.75	6.92	down
CsaV3_6G044440	45.97	62.09	60.41	165.91	245.65	123.23	43.79	38.53	55.29	2.18e-05	0.666904	3.21e-08	up-down	149.91	113.17	173.24	30.71	32.87	15.59	47.01	48.4	202.19	down
CsaV3_6G044570	0.11	0	0	2.11	4.38	0.37	0	0.32	0	0.00428978	NA	0.0124059	up-down	0.2	0.15	0	0	0	0.39	0	0	0	others
CsaV3_6G044670	11.2	8.11	11.73	27.94	18.16	28.69	8.45	12.99	14.07	0.00677059	0.942492	0.0213827	up-down	2.31	3.65	4.1	6.75	5.15	4.08	7.14	8.38	4.3	others
CsaV3_6G044680	47.66	27.62	29.09	103.2	57.91	77.58	41.09	44.74	37.44	0.0367741	0.909036	0.0350392	up-down	30.94	35.53	47.14	28.17	23.93	29.71	34.95	38.1	45.51	others
CsaV3_6G044930	0.35	0	0	4.26	1.07	0.78	0	0.27	0	0.00721918	NA	0.00300676	up-down	2.86	7.79	7.54	0.37	0.07	0	0	0.19	2.54	down
CsaV3_6G044950	2.53	11.09	3.8	16.8	21.71	16.7	8.07	6.9	10.6	0.0150963	0.756916	0.00251743	up-down	15.53	11.31	14.79	1.36	1.36	1.44	2.37	9.25	19.91	down
CsaV3_6G044970	3.46	4.32	2.62	19.91	35.76	19.88	3.71	2.92	3.02	1.87e-08	0.973092	1.13e-09	up-down	30.15	28.31	37.74	1.43	8.25	2.13	0.66	9.14	47.68	down
CsaV3_6G045160	3.71	3.09	0.36	14.38	10.17	9.49	2.58	4.74	2.54	0.0232352	0.942926	0.0296612	up-down	3.52	16.85	5.62	11.15	21.9	5.62	3.8	5.89	19.7	others
CsaV3_6G045220	10.29	14.65	10.25	49.18	34.16	27.81	8.99	10.35	13.07	7.05e-05	0.937984	3.28e-06	up-down	10.31	8.27	13.68	3.63	2.83	2.16	2.64	6.85	30.39	down
CsaV3_6G045420	3.12	5.33	3.42	28.39	14.29	6.86	3.21	4.06	7.35	0.0132111	0.944414	0.0306073	up-down	12.84	39.67	37.37	3.88	8.13	4.35	3.52	12.25	38.43	down
CsaV3_6G045530	11.26	12.73	13.26	63.03	52.19	55.81	13.39	12.84	16.47	2.63e-14	0.924975	5.68e-11	up-down	12.83	15.57	12.34	18.02	15.84	13.28	11.84	12.55	24.21	others
CsaV3_6G045670	3.25	3.92	1.38	91.36	64.33	26.47	1.74	3.3	7.18	8.65e-15	0.869516	2.11e-12	up-down	82.62	53.36	99.09	3	5.81	8.58	5.85	12.58	105.83	down
CsaV3_6G045840	0.5	3.04	1.68	4.68	12.25	4.98	1.36	1.75	3.29	0.0080685	0.913874	0.0205272	up-down	3.78	6.04	7.97	1.82	3.52	1.78	5.14	7	8.82	others
CsaV3_6G045890	0.07	0.79	0.32	4.31	5.47	1.68	0.43	0.28	0.51	0.000364651	NA	9.45e-06	up-down	4.46	7.28	7.61	5.13	2.94	2.29	2.26	6.62	10.3	others
CsaV3_6G045980	46.72	37.96	44.83	87.32	74.74	90.83	34.85	52.35	60.61	0.000287483	0.951028	0.0391896	up-down	22.39	32.02	33.02	25.97	29.77	23.54	23.2	33.33	35.81	others
CsaV3_6G046030	69.7	97.23	119.33	367.91	338.04	304.18	58.88	65.61	97.87	2.6e-09	0.657671	1.7e-14	up-down	60.44	82.14	157.38	33.44	47.17	28.27	86.64	133.47	98.47	down
CsaV3_6G046070	21.1	18.03	17.55	65.83	31.1	58.21	5.54	22.09	24.83	0.0141162	0.969821	0.0336342	up-down	4.87	7.97	5.74	2.36	6.82	5.86	6.5	6.05	6.62	others
CsaV3_6G046080	54.36	122.73	103.14	180.99	274.33	199.36	54.54	50.31	92.26	0.0121255	0.584748	1.03e-06	up-down	106.56	104.13	105.82	69.51	82.99	68.26	89.32	77.73	88.5	others
CsaV3_6G046220	7.75	10.89	8.54	52.76	28.87	21.86	8.44	9.19	13.49	0.00020047	0.942926	0.000537234	up-down	20.04	14.09	27.65	8.3	8.28	5.61	4.05	8.72	18.39	down
CsaV3_6G046270	6.77	8.46	6.63	38.22	21.56	18.12	5.66	4.67	7.71	0.000342449	0.856399	1.34e-05	up-down	5.6	7.87	11.03	2.63	3.41	2.42	3.91	3.53	10.39	down
CsaV3_6G046310	10.13	11.14	6.6	64.68	47.23	48.42	20.07	22.9	14.31	5.9e-13	0.047507	7.3e-05	up-down	5.56	8.03	6.13	15.19	10.49	9.06	5.74	6.99	10.05	up
CsaV3_6G046370	2.48	5.29	4.95	19.75	18.68	15.32	4.96	2.06	2.84	0.0311104	NA	0.0122599	up-down	0	0	0	0	0	0	0	0	0	others
CsaV3_6G046380	0	2.33	0	11.43	13.22	2.23	0	1.6	1.22	0.0434495	NA	0.0390803	up-down	0.25	0.57	0.22	1.77	2.4	0	0	0	2.27	others
CsaV3_6G046440	34.82	48.2	43.79	89.88	112.11	111.25	27.2	33.1	40.59	3.97e-05	0.476301	1.36e-09	up-down	74.84	58.99	63.27	92.01	112.14	67.3	59.8	43.85	56.48	up
CsaV3_6G046520	3.76	0.84	1.9	54.01	32.06	18.6	5.95	9.65	6.22	1.31e-09	0.0657974	1.06e-05	up-down	1.52	0.48	1.36	5.06	2.32	2.95	0.26	1.95	0	up
CsaV3_6G046540	2.82	1.92	1.38	37.46	30.14	20.87	14.41	11.85	10.98	5.72e-16	2.58e-07	0.00583842	up-down	3.43	3.82	3.07	4.98	2.9	0.96	3.46	16.09	0.81	others
CsaV3_6G046590	0.9	1.01	1.1	54.55	29.5	20.05	1.37	0.92	2.02	9.77e-24	0.861031	7.14e-22	up-down	13.74	6.53	17.37	1.08	0.13	0	0.07	1.79	12.84	down
CsaV3_6G046600	1.04	0.68	0.7	25.66	10.6	10.09	1.22	0.99	2.5	4.79e-13	0.628009	2.54e-09	up-down	2.04	1.98	5.84	0.33	0.3	0	0	0.79	4.41	down
CsaV3_6G046610	16.11	23.8	26.8	184.62	112.07	115.64	9.36	14.34	22.11	1.3e-13	0.534319	8.32e-17	up-down	79.56	52.14	71.3	52.42	32.74	24.21	20.41	25.17	110.43	others
CsaV3_6G046640	6.64	7.49	3.65	516.03	421.39	195.68	5.32	7.92	10.95	1.88e-41	0.818177	7.74e-45	up-down	82.8	30.89	101.46	3.95	0.87	0.74	1.36	9.62	68.22	down
CsaV3_6G046970	6.29	7.32	7.55	15.61	14.22	14.86	8.43	6.45	8.65	0.00404544	0.950545	0.0293865	up-down	5.35	6.25	6.85	5.24	4.94	4.18	3.51	5.95	3.01	others
CsaV3_6G047100	40.19	43.61	48.59	78.59	79.43	79.05	28.6	37.71	50.03	0.00366763	0.840292	0.00547448	up-down	51.48	46.92	68.07	16.34	16.65	11.87	19.56	32.24	62.89	down
CsaV3_6G047150	108.03	82.43	66.65	366.73	219.18	218.39	71.38	127.8	142.45	0.00012921	0.771936	0.00777659	up-down	201.1	370.3	466.32	188.88	172.43	88.17	232.85	558.18	326.52	down
CsaV3_6G047290	63.69	52.87	47.44	413.99	302.61	365.13	56.98	61.14	72.69	2.68e-21	0.880146	5.57e-22	up-down	129.47	164.83	146.72	186.76	164.32	141.18	43.71	71.33	111.81	others
CsaV3_6G047450	0.34	0.21	0.51	6.02	3.56	1.78	0.07	0.53	0	2.45e-05	NA	2.78e-05	up-down	1.03	5.2	4.75	0.41	0.27	0	0.11	0.62	6.01	down
CsaV3_6G047720	0.73	0.89	1.07	9.13	3.38	2.96	0.49	1.04	0.82	0.00605318	0.9691	0.0028144	up-down	9.14	143.12	17.91	1.64	10.58	4.89	0.9	1.59	33.48	others
CsaV3_6G048100	11.42	9.55	9.14	35.13	38.33	23.13	8	8.36	11.08	0.000166522	0.942926	2.16e-05	up-down	32.84	29.01	38.65	9.95	15.67	8.72	8.93	18.13	61.98	down
CsaV3_6G048230	6.1	1.71	4.58	23.53	15.9	18.46	2.24	3.22	1.59	0.000559446	0.716769	8.51e-09	up-down	3.72	3.36	3.56	2.12	4.09	3.69	1.17	0.48	4.32	others
CsaV3_6G048240	17.05	22.68	14.3	36.05	36.82	25.54	12.43	8.55	13.27	0.0490514	0.546218	0.000245343	up-down	16.28	12.76	34.25	3.39	6.08	6.33	5.43	12.89	36.07	down
CsaV3_6G048390	28.51	35.19	35.11	61.52	72.76	71.08	26.9	24.4	35.37	0.000160208	0.798784	3.03e-05	up-down	41.94	32.52	37.33	21.62	23.3	16.84	21.98	23.5	38.54	others
CsaV3_6G048480	96.06	211.39	174.36	484.67	417.5	560.84	77.64	148.14	209.46	0.000363813	0.942926	3.38e-05	up-down	135.5	204.61	156.7	236.66	250.46	91.28	298.91	448.33	111.54	others
CsaV3_6G048820	0.57	0.14	0.25	2.84	4.73	5.16	0.26	0.86	0.89	8.96e-05	NA	0.00160894	up-down	0.49	0.6	0.53	0	0.85	0.39	0.1	0.54	0.26	others
CsaV3_6G048850	5.68	8.12	7.05	18.04	25.02	14.77	2.76	5.39	7.83	0.000621493	0.819008	0.000259278	up-down	6.92	6.85	10.86	13.76	11.93	13.49	4.95	3.38	9.86	up
CsaV3_6G049360	2.94	4.5	2.03	20.2	17.68	9.07	3.02	2.7	4.51	6.17e-06	0.981987	2.32e-07	up-down	8.22	6.65	10.19	0.47	1.19	0.04	0.29	2.68	21.1	down
CsaV3_6G049470	9.27	11.38	10.8	18.94	20.83	15.93	9.8	9.21	11.3	0.00762535	0.929432	0.0406497	up-down	14.33	9.39	10.76	6.56	8.42	6.56	6.59	7.39	10.99	others
CsaV3_6G049540	7.29	8.83	10.78	22.71	22.38	20.35	6.73	8.03	14.05	0.000529568	0.984762	0.0121948	up-down	18.06	17.1	16.07	15.93	18.32	11.05	17.06	13.27	31.66	others
CsaV3_6G049550	5.53	5.7	5.49	19.02	11.86	8.42	5.61	6.61	6.37	0.0219855	0.942492	0.0384251	up-down	9.46	10.18	12.74	1.48	1.54	0.5	3.16	4.11	9.77	down
CsaV3_6G049600	16.93	15.75	15.33	46.43	34.48	23.63	15.92	16.61	16.93	0.0235761	0.997319	0.0165006	up-down	12.29	12.52	9.31	6.8	9.49	5.48	8.5	11.25	14.23	others
CsaV3_6G049650	10.48	13.08	16.23	81.67	81.67	81.25	4.98	10.78	42.01	1.34e-06	0.928932	0.0105659	up-down	20.64	26.04	46.01	37.62	31.33	22.29	18.77	26.18	40.78	others
CsaV3_6G049720	1.82	4.03	3.3	15.02	25.15	12.17	1.18	3.32	5.18	2.84e-07	0.989106	7.16e-06	up-down	10.35	4.67	18.44	0.12	0.19	0.26	1.56	3.5	10.51	down
CsaV3_6G049750	11.05	12.81	6.46	61.96	142.03	62.28	7.83	10.38	40.32	2.68e-09	0.650215	0.00173935	up-down	45.18	48.42	55.63	16.01	15.42	6.54	9.01	30.71	60.22	down
CsaV3_6G049760	46.11	29.95	29.12	120.15	62.66	62.51	21.87	39.72	38.67	0.0401594	0.966661	0.0113232	up-down	130.36	137.44	167.59	81.89	101.2	71.83	64.15	84.57	166.87	others
CsaV3_6G049800	0.3	0.22	0.4	20	12.34	7.26	0.42	0.39	0.33	1.01e-16	NA	3.05e-18	up-down	3.59	1.6	8.35	0.11	0	0.08	0	0.54	7.23	down
CsaV3_6G049830	16.21	21.81	22.34	33.08	36.17	38.05	21.54	20.95	18.55	0.0180885	0.995935	0.0206383	up-down	11.47	11.43	12.23	13.13	13.82	9.7	11.43	11.51	14.2	others
CsaV3_6G049960	16.9	32.24	22.95	74.37	106.7	49.39	13.86	17.96	37.82	0.000457355	0.977923	0.000794117	up-down	60.89	59.27	94.73	11.91	8.65	11.89	11.43	44.67	90.35	down
CsaV3_6G050010	29.37	21.56	13.67	122.43	172.19	84.67	1.51	4.39	15.83	4.83e-08	0.19221	9.2e-05	up-down	44.47	64.5	126.87	40.42	42.92	12.39	18.59	71.93	250.11	others
CsaV3_6G050100	0.79	0	0.29	24.35	9.76	4.17	0	0.5	0.57	6.36e-05	NA	1.6e-05	up-down	11.51	15.11	17.5	0	0	0	0	0.45	6.62	down
CsaV3_6G050320	92.59	151.35	142.53	222.4	417.36	281.31	41	66.71	164.47	0.00600761	0.724833	0.00192678	up-down	82.13	125.85	219.81	61.92	67.49	27.71	61.52	111.66	178.23	down
CsaV3_6G050440	0.92	1.24	0.46	13.86	8.01	8.45	0.95	0.29	0.34	9.27e-09	0.859833	1.29e-10	up-down	4.02	5.04	7.11	0.97	0.79	1.33	0.72	1	6.18	down
CsaV3_6G050450	0.52	1.56	1.32	144.72	75.57	81.9	2.02	1.72	1.26	3.9e-40	0.572254	1.12e-44	up-down	12.97	5.72	12.73	2.25	0.81	0.56	0	1.15	5.13	down
CsaV3_6G050470	10.63	16.81	13.67	29.75	41.73	24.41	17.46	11.74	13.85	0.00404544	0.988083	0.00487092	up-down	14.23	8.17	7.22	5.99	6.67	4.78	8.32	10.15	17.62	others
CsaV3_6G050490	29.91	41.12	34.72	119.13	107.84	69.65	36.43	25.62	35.58	0.000363999	0.942926	6.82e-05	up-down	69.34	68.48	82.71	51.94	47.37	39.24	23.42	45.48	98.01	others
CsaV3_6G050560	7.72	9.61	4.35	52.32	34.07	30.9	10.05	10.77	12.47	2.33e-06	0.702366	4.75e-05	up-down	12.73	19.61	43.15	2.93	4.77	5.24	4.37	14.89	33.92	down
CsaV3_6G050790	37.06	75.43	79.51	162.69	227.96	257.58	47.08	45.96	87.25	2.69e-05	0.967129	4.08e-07	up-down	21.5	33	32.02	20.45	14.94	18.71	45.04	51.57	23.29	others
CsaV3_6G050810	6.77	14.04	14.08	33.5	49.4	34.07	11.24	9.02	14.81	0.000232456	0.994605	1.34e-05	up-down	8.86	8.97	8.27	5.31	10.03	11.36	8.41	14.69	10.49	others
CsaV3_6G050820	4.36	15.64	9.66	20.71	53.64	26.37	11.17	6.51	9.7	0.0348424	0.976758	0.00463406	up-down	8.04	14.99	12.53	8.04	9.92	8.17	10.08	15.75	10.71	others
CsaV3_6G051150	4.13	4.41	4.12	34.46	11.56	11.92	4.05	5.85	5.91	0.00133556	0.898241	0.00441728	up-down	0.71	5.58	1.68	5.21	2.71	1.4	0.12	0.11	4.89	others
CsaV3_6G051270	87.71	154.56	140.98	226.66	321.35	294.46	93.64	91.42	132.91	0.00312819	0.759522	1.88e-06	up-down	63.54	63.93	73.19	33.98	43.18	45.37	64.1	64.98	83.92	others
CsaV3_6G051310	3.24	5.88	2.28	11.71	13.6	9.34	1.99	4.79	7.04	0.00679904	0.947552	0.0444398	up-down	8.53	12.01	38.03	3.54	9.95	3.6	20.5	32.35	23.21	down
CsaV3_6G051540	0.62	0.89	0.69	4.53	3.28	1.32	0.71	0.4	0.51	0.00231933	0.819008	5.99e-05	up-down	1.44	0.78	0.98	0.25	0.38	0.93	0.77	1.36	0.77	others
CsaV3_6G051930	34.43	47.62	33.45	131.74	123.98	120.33	76.48	55.41	58.98	2.91e-09	0.215726	0.00149391	up-down	29.98	29.1	36.45	58.56	43.92	59.07	31.3	29.97	57.05	up
CsaV3_6G052050	3.9	4.99	3.47	61.48	61.73	29.09	3.45	3.08	5.91	4.66e-21	0.973778	2.06e-22	up-down	30.99	21.41	56.01	4.51	1.98	1.2	1.42	8.09	32.38	down
CsaV3_6G052660	10.51	15.65	13.29	35.43	33.54	18.04	8.44	10.53	16.1	0.0251864	0.903567	0.00681618	up-down	96.65	72.69	110.86	33.47	39.54	39.43	26.7	36.85	139.81	down
CsaV3_6G052700	41.9	55.52	64.3	98.68	103.73	104.82	47.12	49.91	52.23	0.0286351	0.932646	0.00233242	up-down	112.08	100.15	122.54	136.57	145.56	88.34	88.53	77.16	113.84	others
CsaV3_6G053070	2.87	1.09	0.34	9.68	5.81	2.88	1.22	2.16	1.46	0.0495907	0.987319	0.00360956	up-down	11.56	16.32	14.86	1.01	1.84	0.55	0.96	2.44	29.29	down
CsaV3_6G053210	4.34	2.63	3.34	22.56	23.12	11.18	3.98	5.36	4.62	2.26e-07	0.775353	1.86e-06	up-down	4.54	21.13	14.97	9.28	6.81	5.64	4.23	9.24	18.65	others
CsaV3_7G000130	22.98	20.63	20.14	56.79	52.66	40.43	20.75	29.28	23.08	4.85e-06	0.952662	2.28e-05	up-down	14.65	16.2	14.36	14.3	17.38	20.05	9.63	16.43	19.61	others
CsaV3_7G000160	17.81	22.4	19.43	29.34	36.99	33.67	17.99	19.75	20.07	0.0444523	0.958475	0.019869	up-down	9.53	9.25	9.03	5.55	4.18	5.88	7.64	5.18	8.05	others
CsaV3_7G000220	38.3	35.56	35.55	181.79	127.07	128.28	32.76	29.8	57.37	1.03e-10	0.970345	8.47e-07	up-down	44.63	47.07	65.63	53.85	42.52	31.9	36.27	35.84	85.33	others
CsaV3_7G000760	82.43	59.7	44.57	152.28	132.72	110.89	55.4	62.28	53.44	0.0324671	0.929432	0.000140376	up-down	85.61	106.06	111.76	54.47	68.65	66.42	56.32	105.18	103.27	others
CsaV3_7G000920	0.7	0.62	1.16	6.44	10.59	1.69	0.6	1.32	2.32	0.00748422	0.874853	0.0471634	up-down	1.44	0.5	0.7	0.93	0.88	0	0.26	0.24	2.72	others
CsaV3_7G000950	0.04	0.04	0.12	0.68	0.69	0.32	0.04	0	0	0.0253914	NA	0.00341362	up-down	0.39	0.36	1.26	2.58	6.35	1.14	0.08	0	0	up
CsaV3_7G001120	31.76	45.32	37.88	117.48	143.46	98.04	43.8	36.8	43.41	2.02e-08	0.956792	2.52e-08	up-down	31.28	40.34	25.49	42.27	47.46	42.68	24.26	26.49	26.76	up
CsaV3_7G001570	2.36	3.21	1.85	15.82	20.61	12.94	1.8	1.79	2.4	6.68e-10	0.968734	1.45e-11	up-down	7.22	2.81	8.3	0.41	1.1	0.15	0.56	3.23	50.63	down
CsaV3_7G001850	9.77	17.68	16.75	69.12	62.82	42.82	12.62	12.12	26.16	2.46e-07	0.945669	2.97e-05	up-down	15.73	25.95	28.55	5.02	7.72	2.5	5.54	11.31	36.98	down
CsaV3_7G002170	73.43	64.63	64.7	119.7	156.36	513.41	19.95	40.74	75.7	0.00461867	0.597173	0.0194608	up-down	3.8	8.47	3.94	2.97	4.62	0.74	3.88	17.48	1.02	others
CsaV3_7G002370	31	53.67	45.77	94.34	108.33	104.65	45.26	45.94	40.93	0.000487245	0.998735	2.19e-05	up-down	45.55	48.61	63.3	54.12	45.39	46.93	65.3	50.3	66.79	others
CsaV3_7G002470	67.13	98.33	84.69	249.43	185.3	127.85	90.88	60.99	83.24	0.010691	0.942926	0.00225621	up-down	128.26	158.36	143.46	52.11	64.7	73.39	54.09	96.01	221.94	down
CsaV3_7G002730	20.57	14.91	9.89	101.21	48.04	26.94	10.66	22.43	21.26	0.00435888	0.935394	0.00611363	up-down	111.3	107.44	175.62	13.08	24.63	7.48	17.09	47.83	146.15	down
CsaV3_7G002960	1469.17	1729.41	1867.7	5596.23	4834.6	5126.14	1503.2	1953.84	2738.7	1.41e-11	0.824788	3.86e-05	up-down	800.72	850.97	734.92	1693.61	1743.43	1117.54	1655.46	1192.18	1752.72	up
CsaV3_7G003090	58.72	36.31	37.15	192.79	116.93	125.85	36.16	68.64	43.59	0.000143511	0.9593	0.000354996	up-down	50.13	52.33	43.07	72.77	82.12	66.6	28.84	32.4	47.15	up
CsaV3_7G003150	155.6	195.98	147.02	399.08	252.8	362.82	55.22	84.49	48.34	0.0158172	9.55e-05	2.19e-11	up-down	19.59	49.96	14.56	42.23	62.54	36.39	59.31	71.65	20.46	others
CsaV3_7G003200	4.41	2.18	1	16.95	11.45	8.54	1.57	2.99	1.11	0.00269477	0.917678	2.81e-06	up-down	0	0	0.74	0.44	0.64	0	0.08	0.83	0	others
CsaV3_7G003210	7.3	8.72	2.73	89.64	81.44	82.9	4.36	2.05	6.65	3.08e-17	0.871563	1.39e-22	up-down	45.4	24.34	19.18	22.07	15.3	13.42	9.18	8.54	47.76	others
CsaV3_7G003220	0.36	0.44	0.5	2.07	2.1	1.03	0	0.21	0.33	0.0419189	NA	0.00465688	up-down	2.61	1.68	1.77	1.25	0.88	1.03	0.55	0.45	1.93	others
CsaV3_7G003310	3.96	1.53	0.51	109.07	35.76	25.12	0.84	4.1	13.99	3.06e-09	0.50974	0.0305363	up-down	47.55	59.99	98.21	4.43	2.72	1.76	1.47	20.68	85.88	down
CsaV3_7G003360	11.35	17.71	12.45	36.05	37.83	39.99	13.11	11.83	13.34	0.000115592	0.943534	3.74e-06	up-down	22.01	22.2	19.22	17.36	17.38	18.66	21.16	24.18	27.26	others
CsaV3_7G003380	54.39	58.63	54.63	101.27	112.65	95.63	55.16	49.8	66.28	0.00280626	0.961092	0.00362662	up-down	46.05	53.65	52.29	16.06	21.14	18.87	30.93	43.52	49.41	down
CsaV3_7G004010	1.47	0.15	0.55	25.02	16.96	13.42	1.69	3.02	1.51	1.9e-11	0.538526	1.11e-09	up-down	1.87	5.26	2.88	6.64	12.01	5.78	1.63	1.7	4.73	up
CsaV3_7G004030	0	1.2	0	102.45	89.06	25.44	1.34	0.48	0.19	0.00011183	NA	1.03e-21	up-down	4.21	3.42	8.56	0	0	0	0.12	3.72	14.93	down
CsaV3_7G004040	0	0	0.17	70.86	73.11	20.42	0	0	0.34	6.36e-12	NA	3.55e-13	up-down	4.91	1.37	4.17	0.42	0	0	0	0	18.19	down
CsaV3_7G004130	84.95	100.56	108.25	154.35	210.76	202.76	64.78	68.52	100.52	0.0231519	0.691589	0.000862923	up-down	176.87	236.14	348.54	344.7	266.12	260.31	527.84	409.86	317.46	others
CsaV3_7G004200	29.48	33	34.63	64.76	70.77	63.64	22.25	30.44	26.89	1.72e-05	0.619828	6.45e-06	up-down	22.46	27.6	18.06	20.45	30.39	24.15	17.92	21.89	25.44	others
CsaV3_7G004500	58.82	86.62	39.55	100.66	192.6	145.15	3.94	19.63	48.28	0.0270236	0.593111	0.0310069	up-down	10.33	12.29	29.51	61.89	13.72	21.08	25.71	37.28	11.37	others
CsaV3_7G004510	1.89	5.31	4.45	152.18	181.71	59.66	2.54	1.51	1.56	7.43e-19	0.347702	1.81e-36	up-down	2.31	0	0.55	1.09	0.3	0	0	0	1.2	others
CsaV3_7G005720	0	0	0	3.45	1.73	0.66	0	0	0	0.00101708	NA	0.000635552	up-down	0.41	5.86	3.05	0	0.2	0.41	0	0	0.13	down
CsaV3_7G005750	13.86	41.18	27.8	56.21	108.87	68.48	11.37	14.86	27.15	0.0144499	0.50701	1.92e-07	up-down	18.84	38.77	43.03	15.06	7.65	9.64	24.93	36.86	31.54	down
CsaV3_7G005840	9.93	12.58	9.6	68.55	61.38	31.29	8.11	8.75	12.29	1.01e-07	0.931748	2.68e-09	up-down	6.36	9.48	32.4	5.93	5.15	0.29	6.76	19.38	27.08	others
CsaV3_7G006000	36.93	46.44	36.2	74.49	68.98	61.72	43.16	35.65	40.51	0.0388811	0.9826	0.0234135	up-down	43.07	38.97	41.46	14.98	18.31	22.61	27.35	40.94	52.37	down
CsaV3_7G006180	55.4	59.48	55.49	102.9	93.46	83	42.94	59.18	54.24	0.0325929	0.868428	0.0175118	up-down	29.07	36.09	49.5	13.71	11.52	12.31	16.1	29.76	33.65	down
CsaV3_7G006370	4.9	0.88	0.47	335.63	99.17	39.44	0.6	1.78	2.81	2.51e-05	0.954406	8.46e-09	up-down	81.82	149.57	230.57	5.59	3.75	1.1	1.72	28.86	145.9	down
CsaV3_7G006500	48.49	53.63	53.6	121.04	124.99	84.45	36.39	41.87	46.76	0.00092635	0.398388	3.58e-06	up-down	57.13	52.78	60.2	30.92	39.48	25.27	28.12	31.14	55.18	others
CsaV3_7G006720	17.75	32.11	28.74	56.4	125.09	47.71	27.81	16.14	24.9	0.00808969	0.899327	0.0004818	up-down	47.78	48.3	70.92	7.01	11.81	22.53	21.34	26.3	35.83	down
CsaV3_7G007060	5.32	5.96	5.78	19.08	17.49	15.17	5.11	3.8	4.73	1.29e-05	0.801896	4.97e-07	up-down	11.82	11.67	12.1	7.35	11.37	8.35	7.41	7.47	15.93	others
CsaV3_7G007170	1.51	2.65	1.87	8.43	5.93	4.21	2.07	1.47	3.52	0.00285091	0.948236	0.0171744	up-down	0.69	1.51	2.87	0.24	0.57	0.36	0.76	1.25	3.09	others
CsaV3_7G007180	0.32	0.61	0.36	3.7	2.54	1.8	0.11	0.17	0.15	0.000134677	0.516683	1.67e-07	up-down	3.12	1.91	5.7	0.25	0.28	0	0.05	0.7	11.52	down
CsaV3_7G007370	6.87	8.55	7.41	25.79	29.62	18.03	13.36	9.95	15.61	1.74e-06	0.111887	0.0438534	up-down	11.61	13.93	25.21	4.03	5.18	3.48	6.44	10.78	28.61	down
CsaV3_7G007500	2.62	2.24	1.06	28.21	12.72	10.94	2.49	2.4	2.13	5.59e-08	0.942926	1.33e-10	up-down	9.84	12.62	15.91	4.98	10.77	2.84	1.68	5.08	22	others
CsaV3_7G007850	61.22	58.71	56.37	120.13	117.02	89.81	46.37	54.4	53.03	0.0103584	0.69708	0.000263051	up-down	58.48	51.36	53.39	45.11	58.95	51.9	39.82	40.08	54.8	others
CsaV3_7G007890	1.69	2.62	0.75	38.16	30.05	11.8	0.77	1.92	2.06	5.27e-09	0.986535	6.05e-11	up-down	10.9	8.05	13.75	2.04	4.19	0.51	2.13	4.9	15.98	down
CsaV3_7G007970	10.47	10.12	7.18	22.33	28.04	15.44	8.91	8.01	11.08	0.0095069	0.995647	0.00438295	up-down	25.51	27.34	23.79	8.29	8.75	6.86	7.99	12.38	35.33	down
CsaV3_7G008210	2.37	11.05	31.34	462.33	202.78	118.24	1.46	2.97	2.87	0.00139774	0.0378326	1.06e-33	up-down	2.3	3.4	2.21	17.49	6.17	20.65	0.32	1.5	3.63	up
CsaV3_7G008380	110.28	65.64	41.89	279.39	158.47	146.31	48.74	65.81	67.81	0.0308703	0.859182	1.52e-05	up-down	51.04	80.49	139.08	13.44	20.59	11.81	14.64	27.53	43.26	down
CsaV3_7G008450	3.8	3.94	2.46	111.6	57.8	23.76	1	3.16	4.91	8.03e-11	0.9691	1.53e-11	up-down	67.69	79.29	146.77	10.15	14.65	8.97	9.14	23.18	92.21	down
CsaV3_7G008470	56.95	61.84	78.55	111.07	140.42	157.46	34.08	49.64	65.86	0.00349477	0.576416	9.48e-05	up-down	51.91	53.05	60.29	46.48	54.29	50.09	66.53	56.66	46.44	others
CsaV3_7G008480	8.87	9.33	7.37	58.8	44.15	29.09	7.74	7.32	8.87	1.77e-09	0.942622	6.27e-12	up-down	14.25	18.27	25.91	6.72	15.73	12.06	7.42	16.09	30.26	others
CsaV3_7G008710	8.73	18.43	14.84	39.35	42.55	27	13.52	7.25	15.65	0.00388815	0.913874	0.000250487	up-down	11.36	8.63	16.26	2.36	2.65	1.88	2.95	9.61	17.4	down
CsaV3_7G010150	27.19	12.33	10.2	97.89	52.06	65.82	18.39	28.47	16.96	0.000363932	0.893863	6e-05	up-down	34.85	28.65	18.9	38.01	43.47	39.76	17.77	16.8	22.69	up
CsaV3_7G010160	42.5	47.09	44.19	68.91	91.74	78.5	44.9	45.29	49.93	0.0109056	0.990973	0.0231636	up-down	2.31	5.88	4.44	10.96	9.88	6.38	12.77	12.99	4.41	up
CsaV3_7G011470	33.24	45.27	44.57	66.12	76.17	76.2	26.37	29.25	36.46	0.0144376	0.338965	1.34e-05	up-down	15.41	27.79	31.74	7.66	8.53	14.13	21.88	29.99	17.59	down
CsaV3_7G011490	19.68	20.31	21.55	42.32	39.81	34.3	11.81	23.49	18.99	0.00288039	0.892745	0.0142277	up-down	7.55	15.45	25.38	7.23	9.88	15.2	23.96	34.25	16.36	others
CsaV3_7G018610	37.39	22.97	18.69	255.58	79.09	82.89	21.94	28.94	19.73	0.000211565	0.914963	6.95e-07	up-down	36.09	16.18	48.38	4.45	1.87	2.46	2.54	9.98	40.86	down
CsaV3_7G021760	17.14	20.26	17.45	32.79	36.85	27.04	20.46	17.5	18.44	0.0401594	0.998717	0.0369652	up-down	47.91	42.57	36.89	48.09	38.63	42.35	46.25	42.74	53.51	others
CsaV3_7G022690	1.8	2.52	3.32	19	36.53	11.98	1.92	1.68	7.14	0.000132656	0.943131	0.00216882	up-down	68.26	143.98	116.82	32.93	40.37	15.73	4.9	38.36	102.47	down
CsaV3_7G024010	2.83	4.41	2.26	9.96	14.08	10.98	3.82	2.35	3.21	0.00199465	0.989105	0.00118384	up-down	7.5	4.12	2.78	3.01	4.63	3.18	2.49	4.77	6.99	others
CsaV3_7G024020	54.07	56.44	59.77	93.75	92.79	111.03	53.95	51.15	69.45	0.0180243	0.99798	0.0378819	up-down	59.68	61.24	61.83	50.86	56.43	51.46	48.16	44.24	49.93	others
CsaV3_7G024580	11.61	16.46	17.5	36.66	49.13	25.87	14.37	13.86	17.22	0.00398423	0.989484	0.00111412	up-down	15.73	14.69	20.11	6.55	4.92	5.82	6.54	10.16	23.09	down
CsaV3_7G024740	35.12	31.05	32.04	92.37	77.94	55.9	29.34	32.58	33.67	0.001792	0.954686	0.000284374	up-down	78.03	84.26	141.73	34.52	33.65	30.48	29.1	39.5	112.39	down
CsaV3_7G024760	2.81	9.87	22.19	81.65	52.09	39.97	7.2	3.04	4.63	0.00228797	0.345618	9.68e-19	up-down	0	0	0	1.7	1.25	2.98	0.05	0	0.75	up
CsaV3_7G024880	183.35	152.38	92.44	1263.81	923.02	482.5	88.4	132.17	167.67	7.09e-08	0.929364	1.26e-11	up-down	834.47	813.02	1090.18	113.51	125.34	128.23	179.12	333.48	876.31	down
CsaV3_7G025230	42.12	15.25	21.76	201.56	125.36	140.69	27.76	37	32.53	8.21e-07	0.91544	2.92e-12	up-down	57.64	85.7	71.4	111.42	121.33	93	17.21	30.81	58.03	up
CsaV3_7G025370	6.84	11.43	10.17	238.38	158.71	70.38	11.35	10.87	12.86	3.5e-17	0.839836	1.66e-19	up-down	79.16	50.53	108.7	3.5	3.69	2.75	3.97	22.64	165.17	down
CsaV3_7G025800	35.8	48.05	45.15	113.13	111.81	102.53	73.31	39.63	64.67	5.25e-06	0.631975	0.0148921	up-down	44.67	34.92	39.34	39.83	31.2	49.62	51.87	46.64	56.97	others
CsaV3_7G026250	3.73	4.22	3.05	9.97	13.26	9.18	2.52	3.87	1.47	0.000685919	0.81297	0.000207826	up-down	29.57	19.22	16.66	34.02	42.32	23.34	9.91	8.4	18.09	up
CsaV3_7G026380	11.72	14.94	14.79	39.34	61.44	75.94	11.24	12.19	19.65	9.37e-09	0.99448	1.32e-07	up-down	9.88	9.32	14.81	7.2	10.62	8.94	11.72	15.11	15.07	others
CsaV3_7G026400	0.98	2.56	1.61	16.81	12.13	13.88	1.29	3.15	3.76	5.76e-12	0.74399	5e-07	up-down	3.58	5.87	8.62	1.2	2.44	0.65	2.66	15.29	16.21	down
CsaV3_7G026420	0.16	0.58	0.18	7.56	2.28	1.22	0.18	0.15	0.54	0.0109587	NA	0.0065351	up-down	16.59	11.17	15.28	1.11	3.24	0.16	0.49	2.84	44.56	down
CsaV3_7G027070	16.57	13.9	15.26	50.61	24.4	23.33	11.21	18.16	16.11	0.0250289	0.827567	0.00341983	up-down	19.75	17.59	24	8.54	9.58	8.05	9.64	11.8	27.64	down
CsaV3_7G027190	37.77	32.66	23.44	90.76	95.13	58	32.25	33.8	35.25	0.00758902	0.9826	0.00127612	up-down	38.62	40.87	44.59	29.82	27.37	28.96	22.26	32.6	64.3	others
CsaV3_7G027450	0.76	0.65	0.49	4.61	3.93	2.11	0.25	0.1	0	0.00444056	NA	7.58e-05	up-down	6.19	1.97	2.38	3.88	4.03	2.27	0.65	0.52	0.25	others
CsaV3_7G027500	3.54	4.21	2.97	8.76	12.23	6.99	2.93	2	2.41	0.00460534	0.488756	4.64e-06	up-down	3.6	5.27	5.38	1.43	3.93	3.41	1.16	2.98	5.44	others
CsaV3_7G027550	0.58	0.71	0.52	4.68	1.73	2.48	0.23	1.04	0.88	0.00484674	0.969821	0.0243563	up-down	1.22	0.54	0.17	0.46	0.37	0.68	0.31	1.05	0.25	others
CsaV3_7G027670	0.92	1.23	0.72	30.83	13.38	8.2	0.33	0.84	0.54	1.5e-13	0.666765	5.04e-19	up-down	1.09	1.62	2.04	0.74	0.59	0.3	0.22	0.38	2.17	others
CsaV3_7G027810	21.48	21.42	22.09	37.35	44.26	33.8	11.33	18.72	14.85	0.0151828	0.313464	0.000175103	up-down	19.78	33.43	32.39	12.08	25.08	15.26	28.7	48.74	42.35	others
CsaV3_7G027820	30.3	35.07	36.99	72.39	81.43	58.48	30.45	30.15	33.05	0.000333887	0.836755	9.14e-06	up-down	32.03	29	29.56	19.74	24.75	18.7	18.91	15.35	29.05	others
CsaV3_7G027860	52.46	108.29	165.68	625.66	453.39	323.52	4.12	8.76	6.68	0.000398269	4.48e-18	8.1e-94	up-down	22.91	15.19	18.75	35	23.82	19.49	9.45	5.99	10.94	others
CsaV3_7G028090	26.92	21.13	27.33	73.05	54.3	38.5	10.91	19.67	15.49	0.0160384	0.163834	4.46e-06	up-down	43.33	31.4	33.8	20.67	35.6	23.42	20.9	13.71	42.85	others
CsaV3_7G028130	2.88	3.54	5.19	7.86	10.37	6.62	2.69	2.86	3.11	0.0391691	0.696251	0.000174234	up-down	9.6	9.83	12.2	2.86	4.35	1.95	1.53	2.68	11.24	down
CsaV3_7G028220	5.82	5.35	5.31	26.91	21.04	13.89	6	5.65	7.41	1.91e-06	0.907654	9.05e-06	up-down	27.96	39.77	49.16	5.7	5.85	3.13	7.17	18.61	43.1	down
CsaV3_7G028410	12.85	16.88	17.46	41.55	61.3	45.13	26.08	14.46	21	2.41e-07	0.73855	0.00146101	up-down	15.73	19.16	19.54	20.28	25.86	21.67	18.28	16.46	28.1	others
CsaV3_7G028420	30.48	28.01	15.41	155	144.17	96.97	22.4	22.86	26.94	5.27e-09	0.976179	1.29e-17	up-down	22.88	34.96	50.33	18.34	70.71	28.49	26.1	26.08	89.39	others
CsaV3_7G028550	46.71	48.32	35.05	98.72	104.53	84.18	58.41	68.73	53.63	0.000452103	0.511756	0.0398717	up-down	42.53	39.13	47.96	67.57	44.33	68.33	32.35	41.05	51.76	up
CsaV3_7G028620	22.5	20.78	20.89	72.61	58.61	60.12	18.58	23.61	22.25	1.4e-08	0.988655	7.06e-08	up-down	36.22	33.24	29.36	28.51	36.2	20.59	16.89	22.97	29.65	others
CsaV3_7G028670	30.43	45.6	46.2	97.27	106.08	89.9	45.87	37.29	55.03	8.59e-05	0.927065	0.000639276	up-down	75.94	125.45	133.99	26.13	28.68	34.49	68.18	85.78	104.55	down
CsaV3_7G029060	17.86	6.54	3.86	159.61	94.03	54.59	5.5	7.74	6.02	4.06e-11	0.734606	2.79e-26	up-down	27.74	35.32	62.54	4.54	5.51	2.99	0.88	20.02	111.6	down
CsaV3_7G029160	311.84	343.5	408.67	1106.23	534.57	736.29	350.05	294.14	253.64	0.0153289	0.749043	0.000702189	up-down	208.46	234.37	252.4	592.04	392.8	519.39	200.75	252.01	272.96	up
CsaV3_7G029310	20.51	25.68	24.43	45.29	40.98	51.91	20.85	25.57	22.7	0.00325066	0.969821	0.00381445	up-down	12.88	13.47	13.64	10.39	11.01	12.56	13.34	12.54	16.82	others
CsaV3_7G029610	14.6	17.35	18.91	27.07	32.92	27.61	13.71	15.55	15.22	0.0194347	0.757772	0.00116809	up-down	12.44	11.18	10.6	5.8	12	10.14	9.87	10	12.9	others
CsaV3_7G029830	44.56	42.78	39.38	102.9	98.81	56.86	34.08	45.35	48.06	0.0299387	0.990034	0.0229338	up-down	81.45	92.78	116.95	37.47	34.06	43.04	23.82	60.71	121.23	down
CsaV3_7G029850	12.75	12.94	6.82	46.52	65.58	44.03	3.67	5.71	12.89	2.1e-08	0.694952	7.75e-10	up-down	6.38	10.14	15.85	8.66	8.21	3.66	5.34	10.81	11.94	others
CsaV3_7G029990	0.22	0.95	1.13	3.42	3.88	1.17	0.52	0.63	0.62	0.00839726	0.955406	0.000223622	up-down	2.09	1.64	3.33	0	1.63	0.07	0.44	1.64	1.69	others
CsaV3_7G030160	72.83	93.45	102.71	219.93	217.12	236.66	72.3	81.84	95.19	4.72e-06	0.883734	9.26e-10	up-down	80.45	75.02	78.32	71.73	89.3	71.23	65.32	80.14	82.44	others
CsaV3_7G030280	0.61	0	0	442.07	603.18	260.19	1.88	1.13	4.4	7.86e-16	NA	3.99e-38	up-down	80.01	23.15	91.91	2.06	0.45	0	0.46	6.56	70.08	down
CsaV3_7G030300	39.86	52.86	42.47	208.64	417.16	175.85	49.79	37.12	68.33	4.63e-10	0.919062	7.47e-09	up-down	153.72	92.94	111.2	102.83	139.41	95.81	65.9	71.73	129.77	others
CsaV3_7G030350	1.57	1.69	2.1	6.14	8.88	4.06	1.25	0.89	2.27	0.0182834	0.943469	0.00811548	up-down	0.24	2.16	2.3	0.65	0.94	0	0.6	1	2.07	others
CsaV3_7G030440	14.24	7.67	7.19	444.03	168.01	193.95	7.9	9.25	7.85	2.63e-21	0.880146	1.75e-36	up-down	25.22	36.95	67.96	14.81	13.6	7.43	4.16	13.08	27.49	down
CsaV3_7G030480	305.46	338.71	349.65	649.44	613.26	775.74	276.65	284.26	353.07	0.00214325	0.898262	0.000292332	up-down	185.53	171.36	210.88	185.75	229.34	148.66	241.21	254.16	187.28	others
CsaV3_7G030660	82.6	53.22	41.54	170.97	135.39	128.77	37.01	55.83	68.64	0.0234237	0.896531	0.00011497	up-down	53.34	72.94	88.79	22.28	49.76	24.71	28.67	50.06	107.67	down
CsaV3_7G030690	2.65	1.98	5.38	50.22	34.3	26.78	1.6	1.55	3.53	5.65e-12	0.807239	5.59e-19	up-down	13.15	12.1	18.78	4.32	3.57	2.8	0.62	4.15	13.09	down
CsaV3_7G031230	5.21	9.69	9.06	16.93	19.13	12.32	5.8	3.98	8.08	0.0299387	0.58483	0.000106973	up-down	4.51	9.72	8.02	3.41	4.75	3.98	2.47	5.86	5.78	others
CsaV3_7G031330	139.15	348.45	289.5	476.05	778.11	681.72	358.6	255.54	382.86	0.0132803	0.822762	0.0190547	up-down	252.64	290.97	465.92	512.2	336.57	443.96	489.95	473.97	537	others
CsaV3_7G031400	7.24	10.71	9.41	30.51	24.51	22.52	12.91	10.22	12.97	2.86e-05	0.676392	0.00352998	up-down	18.26	16.36	20.43	13.09	17.5	15.41	14.98	16.12	17.97	others
CsaV3_7G031430	7.95	5.56	6.87	27.28	27.72	22.12	5.85	9.5	9.68	2.7e-07	0.897715	4.79e-05	up-down	9.86	10.44	12.64	3.53	4.79	4.34	5.65	6.34	12.8	down
CsaV3_7G031610	0	0.07	0	4.49	0.46	0.52	0	0.11	0.07	0.00128795	NA	0.00188668	up-down	0.54	1.47	1.13	0.43	0	0	0.06	0.33	2.26	others
CsaV3_7G031620	0.06	0	0	27.73	5.69	1.49	0	0.23	0.07	4.88e-05	NA	0.000211025	up-down	3.12	5.23	5.79	0	0	0	0	1.15	5.3	down
CsaV3_7G031810	126.6	68.47	73.02	311.76	182.5	205.68	114.53	121.31	91.52	0.0105504	0.878589	0.0088354	up-down	115.46	119.56	99.27	173.41	200.7	178.11	69.31	76.31	121.22	up
CsaV3_7G032090	13.23	22.08	23.62	59.36	50.47	57.79	19.25	18.79	25.95	7.99e-05	0.978669	3.12e-05	up-down	0	0.42	0	0	0.26	1.81	0.27	0.5	0	others
CsaV3_7G032140	5.4	0	7.18	28.96	56.1	28.67	2.36	4.89	9.89	0.0180037	NA	0.0256625	up-down	4.8	22.83	23.9	4.86	3.96	25.37	23.14	26.82	15.14	others
CsaV3_7G032150	2.33	17.41	16.77	73.15	137.9	127.32	4.14	21.15	38.87	0.000134677	0.907654	0.00263023	up-down	45.52	75.29	55.85	41.22	37.41	123.86	136.21	100.05	58.69	others
CsaV3_7G032350	312.8	259.16	243.7	1703.98	441.22	388.9	153.18	248.3	353.42	0.0337691	0.942492	0.00969554	up-down	442.71	347.36	781.25	161.16	224.82	68.68	131.78	214.49	659.99	down
CsaV3_7G032360	0.28	0.98	1.22	71.54	9.75	7.97	0.31	0.79	1.83	5.77e-06	NA	1.61e-06	up-down	96.67	51.03	94.61	0.3	0.49	0	0.17	7.41	207.48	down
CsaV3_7G032730	1.47	1.05	7.35	23.18	39.4	13.39	2.47	3.12	0	0.0187332	NA	0.00217088	up-down	24.42	8.68	33.01	0	0	0	1.71	6.35	19.26	down
CsaV3_7G032740	7.26	12.22	10.91	26.65	30.54	17.73	6.24	7.21	10.09	8.66e-05	0.852668	7.25e-07	up-down	20.32	13	20.5	14.9	17.28	15.97	4.71	8.54	11.66	others
CsaV3_7G032830	8.65	6.47	5.57	19.72	16.47	11.42	5.11	6.65	5.87	0.00445803	0.817024	2.98e-05	up-down	9.07	7.18	8.17	4.63	5.87	5.09	3.59	4.17	9.89	others
CsaV3_7G033580	0.5	1.41	0.51	9.56	7.77	3.62	1.52	0.95	2.27	2.31e-06	0.601745	0.000222617	up-down	7.65	4.06	4.79	1.11	0.95	1.1	2.8	3.12	11.28	down
CsaV3_7G033910	0.93	0.74	0.69	10.45	6.58	3.84	0.89	1.03	0.86	0.000177044	NA	0.000258634	up-down	15.31	10.88	25.2	0.43	1.05	0.8	0.12	1.55	8.99	down
CsaV3_7G033930	35.78	22.74	18.86	124.62	139.38	258.76	5.22	36.91	46.84	8.29e-09	0.976354	0.0295747	up-down	4.53	31.79	32.97	10.94	36.7	14.23	59.87	106.61	18.02	others
CsaV3_7G033940	12.9	14.44	10.44	65.47	42.75	34.95	9.63	8.4	6.48	4.71e-07	0.34931	2.06e-11	up-down	19.51	23.65	28.52	19.36	25.5	25.79	6.32	14.6	38.74	others
CsaV3_7G034170	49.08	68.61	73.28	101.87	112.97	115.9	61.75	52.05	78.62	0.0416561	0.990973	0.0373597	up-down	26.47	30.26	42.58	44.29	34.52	29.69	30.15	26.85	46.02	others
CsaV3_7G034340	155.79	107.78	103.8	409.31	251.37	346.23	102.29	135.09	125.46	0.000646923	0.978161	1.83e-05	up-down	189.05	211.64	157.35	245.81	283.91	211.55	70.16	111.54	177.89	up
CsaV3_7G034440	20.1	19.21	14.64	53.68	54.4	35.99	12.37	12.76	16.66	0.000177386	0.5383	5.62e-09	up-down	57.33	45.92	64.72	16.65	22.77	19.97	18.25	30.55	51.61	down
CsaV3_7G034610	13.48	18.84	16.43	32.08	35.18	34.29	18.6	18.47	14.56	0.00187697	0.990973	0.0363752	up-down	3.37	2.07	2.2	2.46	2.63	2.53	2.35	1.94	2.82	others
CsaV3_7G034640	16.48	21.02	16.91	48.24	58.03	55.76	25	21.86	20.08	8.91e-09	0.759522	3.11e-05	up-down	21.06	28.19	29.98	19.59	14.66	16.68	24.04	29.08	32.69	others
CsaV3_7G034680	23.37	18.08	18.58	77.58	55.62	52.5	10.91	18.64	18.81	5.51e-06	0.732582	5.95e-08	up-down	13.62	17.34	17.57	3.87	5.67	5.56	5.69	7.7	21.59	down
CsaV3_7G034730	8.22	6.1	5.49	58.5	27.53	15.37	4.75	8.63	6	0.000130955	0.981287	1.86e-05	up-down	9.78	16.97	18.38	2.76	8.02	3.01	3.26	7.33	22.23	down
CsaV3_7G034900	45.48	25.39	25.57	102.18	61.82	64.93	29.13	47.32	23.25	0.0308585	0.99716	0.021211	up-down	38.35	43.21	34.53	49.13	53.47	42.33	18.23	29.5	26.39	others
CsaV3_7G035010	1.56	1.54	0.78	14.36	6.31	3.32	0.72	1.55	1.85	0.000241664	0.993124	9.68e-05	up-down	13.22	12.22	22.71	0.13	0.21	0	0.76	2.4	20.25	down
CsaV3_7G035130	4.89	6.45	3.71	286.13	183.74	90.31	5.41	5.82	12.67	2.93e-29	0.616622	4.68e-23	up-down	101.18	86.88	126.92	5.51	4.11	3.34	6.65	31.39	163.02	down
CsaV3_7G035140	2.06	2.79	1.57	12.14	8.62	6.27	1.86	1.81	3.06	4.02e-05	0.99448	2.5e-05	up-down	6.22	8.81	9.56	2.03	1.73	1.8	1.55	3.87	15.44	down
CsaV3_7G035220	2.31	3.43	2.46	5.55	8.88	4.85	2.07	2.28	2.39	0.0284797	0.854204	0.00209976	up-down	6.91	9.33	10.62	1.45	4.19	1.15	2.5	1.91	5.32	down
CsaV3_7G035320	2.58	2.75	3	9.84	14.07	7	1.05	3.14	2.41	3.46e-05	0.880146	5.53e-05	up-down	0.92	0.57	1.23	0.71	0.44	0.3	1.18	1.61	1.19	others
CsaV3_7G035410	38.73	47.34	43.21	90.3	90.12	83.67	53.35	45.94	55.76	0.00644085	0.9691	0.00496138	up-down	44.76	39.24	46.53	32.26	30.86	39.4	31.38	36.51	53.15	others
CsaV3_UNG000020	1.1	0.97	0.23	8.11	6.75	2.4	0.23	0.67	0.79	0.00148669	0.942492	4.57e-05	up-down	0.63	4.35	13.71	0	0.09	0	0.09	3.28	4.92	down
CsaV3_UNG013130	16.02	14.95	13.11	44.67	44.16	31.22	18.25	17.72	19.24	2.72e-05	0.628066	0.00426827	up-down	0	0.24	0.14	0	0	0	0.31	0	0	others
CsaV3_UNG019130	0	0	0.04	6.26	1.53	1.29	0.11	0.49	0.31	2.76e-06	NA	0.000250487	up-down	2.65	1.93	3.11	0.29	0	0.11	0.08	0.94	2.47	down
CsaV3_UNG022130	4.4	8.11	1.32	29.5	50.5	17.57	1.83	1.19	1.32	0.000113645	0.14226	4.79e-22	up-down	7.9	103.87	10.38	4.56	10.44	9.82	0.65	1.65	84.45	others
CsaV3_UNG050360	17.28	23.81	32.24	34.93	43.7	48.08	12.97	16.27	23.38	0.0314259	0.48934	0.00108248	up-down	37.21	34.13	44.57	23.77	42.75	26.85	31.1	25.81	41.38	others
CsaV3_UNG110800	24.06	28.7	26.73	41	47.44	46.02	20.79	24.06	27.99	0.0190788	0.870225	0.00860157	up-down	4.43	3.44	1.87	3.7	1.29	0.86	0.64	0.86	0.47	others
CsaV3_UNG148160	8.52	11.39	12.22	68.35	79.81	53.4	13.73	7.88	17.43	5.71e-08	0.949109	4.85e-06	up-down	0	0	0	0	0	0	0	0	0	others
CsaV3_UNG167280	0	0.2	0	9.48	13.41	3.9	0.38	0.16	0.18	5.99e-06	NA	1.09e-06	up-down	0.25	0.1	1.13	0	0.36	0.33	0.86	0.23	0.16	others
CsaV3_UNG227860	0.19	0.1	1.16	6.75	19.28	5.55	1.67	0.24	0.89	2.62e-14	0.353082	7.34e-08	up-down	1.61	11.59	6.77	1.22	0	0.91	0.45	2.29	5.36	down
CsaV3_UNG227910	1.08	0.34	0.69	21.46	4.4	1.6	0.7	1.62	1.25	0.000889109	0.831042	0.00320114	up-down	0	0	0	0	0	0	0	0	0	others
CsaV3_UNG236440	6.77	8.57	6.46	51.09	19.39	20.58	6.92	6.84	8.39	0.000328187	0.996313	7.59e-05	up-down	0	0	0	0	0	0	0	0	0	others

## Sheet: down-up
Table 2d The expression of down-up genes in WT and Csrboh5.1 mutants
Gene	WT_CK_1	WT_CK_2	WT_CK_3	WT_R4h_1	WT_R4h_2	WT_R4h_3	WT_R48h_1	WT_R48h_2	WT_R48h_3	qvalue_CK-vs-R4h	qvalue_CK-vs-R48h	qvalue_R4h-vs-R48h	gene_expression_type	Csrboh5.1_CK_1	Csrboh5.1_CK_2	Csrboh5.1_CK_3	Csrboh5.1_R4h_1	Csrboh5.1_R4h_2	Csrboh5.1_R4h_3	Csrboh5.1_R48h_1	Csrboh5.1_R48h_2	Csrboh5.1_R48h_3	gene_expression_type
CsaV3_1G000100	704.17	567.84	630.34	357.75	343.67	443.6	517.87	779.42	712.35	0.000302066	0.98395	0.000432237	down-up	184.84	243.86	225.21	79.95	81.08	113.71	216.35	238.27	178.68	down
CsaV3_1G000140	293.91	207.72	235.16	140.22	99.36	117.04	375.34	306.48	259.05	2.54e-05	0.969821	0.000330391	down-up	124.42	235.74	184.94	56.38	35.68	95.79	121.17	227.91	26.64	down
CsaV3_1G000160	1108.39	924.27	1218	638.04	458.75	786.59	2096.4	1424.52	1766.83	0.0016228	0.111679	5.27e-08	down-up	271.44	580.05	466.44	165.39	118.09	323.46	660.93	853.77	187.78	others
CsaV3_1G000240	2.76	1.48	2.1	1.56	1.19	1.22	2.26	2.67	2.16	0.0410362	0.966661	0.00340289	down-up	0.73	0.91	0.79	0.34	0.39	0.51	0.79	0.94	0.65	others
CsaV3_1G000660	78.14	67.62	75.25	51.6	34.2	51.02	78.25	98.74	57.5	0.00222493	0.979381	0.00512566	down-up	12.63	30.22	17.79	8.31	5.27	11.49	24.72	30.67	8.88	down
CsaV3_1G000690	19.17	10.25	10.55	7.82	4.38	4.71	23.16	22.92	19.28	0.007028	0.465728	8.33e-08	down-up	3.81	6.03	4.93	2.56	1.52	0.35	0.9	4.06	3.41	others
CsaV3_1G000780	5.49	7.57	8.36	4.63	5.28	5.38	10.68	7.46	12.03	0.0452086	0.585534	0.000487836	down-up	1.64	4	4.25	1.25	0.62	1.94	4.31	7.47	1.14	others
CsaV3_1G000830	734.98	355.81	515.13	335.6	167.91	291.24	609.08	669.18	772.78	0.00558696	0.819008	1.05e-06	down-up	113.26	164.84	176.49	40.04	34.86	39.01	124.84	173.02	53.13	down
CsaV3_1G001110	1155.61	594.49	762.23	477.21	304.8	548.72	1237.61	1454.31	1104.35	0.00716145	0.488084	3.44e-08	down-up	231.11	391.94	374.24	187.96	119.37	167.53	404.92	499.55	136.24	down
CsaV3_1G001330	15.72	25.55	20.6	11.68	15.22	14.16	21.54	19.93	19.05	0.0108358	0.978674	0.0100474	down-up	117.69	63.27	44.85	86.36	79.68	76.88	65.99	46.8	54.55	others
CsaV3_1G001420	101.35	129.41	126.38	67.28	66.19	90.31	99.2	104.81	120.25	0.000566442	0.828027	0.00661566	down-up	44.32	82.97	62.86	22.97	25.86	32.43	105.29	110.61	43.11	down
CsaV3_1G001600	551.99	337.83	290.54	262.46	212.21	288.31	425.63	564.43	400.04	0.0299168	0.919056	0.000181305	down-up	84.82	166.01	123.34	31.12	39.5	77.22	238.96	256.79	95.36	down
CsaV3_1G001760	101.09	93.1	88.88	65.34	61.96	78.98	122.55	80.53	109.44	0.0113023	0.94549	0.00967347	down-up	42.45	71	75.64	37.36	41.69	55.53	49.64	55.81	39.08	others
CsaV3_1G001940	24.42	30.85	27.39	15.74	20.85	20.02	30.26	26.35	33.09	0.0102897	0.970261	0.00385985	down-up	29.5	33.31	28.85	19.62	17.62	35.57	34.57	35.62	29.98	others
CsaV3_1G001970	16.46	32	29.29	6.91	13.02	12.72	22.51	13.38	27.84	0.00118466	0.854204	0.015151	down-up	6.46	13.02	9.9	4.67	4.57	9.41	30.44	20.75	4.62	others
CsaV3_1G002370	1079.49	1082.75	982.01	557.72	665.26	749.04	812.37	836.59	959.67	8.22e-05	0.464198	0.0136009	down-up	183.57	361.09	273.5	155.8	61.19	216.13	461.94	521.4	105.9	others
CsaV3_1G002410	3278.79	3795.01	4428.42	619.91	694.51	551.41	3025.2	2661.1	3506.41	1.73e-48	0.465728	1.25e-36	down-up	1444.61	2988.94	1862.81	179.3	77.53	414.09	2561.72	3839.33	469.53	down
CsaV3_1G002440	1052.32	1174.91	1247.92	618.83	579.84	800.89	1220.19	819.89	1452.27	4.18e-05	0.990973	0.00149225	down-up	259.95	350.4	311.89	140.07	130.62	196.59	374.06	372.29	149.91	down
CsaV3_1G002560	116.9	163.35	112.92	31.46	49.31	38.58	296.11	158.55	206.54	5.74e-13	0.183391	2.18e-19	down-up	53.25	62.27	43.31	17.62	27.67	27.96	40.21	60.16	50.43	down
CsaV3_1G002840	6.65	3.04	2.83	0.34	0.55	0.34	3.19	3.13	3.3	1.08e-07	0.825338	1.08e-07	down-up	0	0	0	0.33	0	0	0.06	0	0	others
CsaV3_1G002860	117.65	67.69	85.54	69.63	34.78	54.04	117.45	140.87	118.3	0.0223198	0.586652	1.65e-05	down-up	80.62	99.23	93.27	156.33	97.8	128.71	110.88	138.05	51.73	up
CsaV3_1G002970	4.57	9.48	4.12	0.77	0.11	0.5	7.83	4.39	4.72	2.01e-09	0.9691	8.19e-11	down-up	1.57	3.52	1.07	2.4	2.56	6.35	0	1	2.51	others
CsaV3_1G003160	30.03	34.99	32.48	19.54	25.36	21.22	29.4	27.6	29.1	0.000237642	0.732582	0.0169857	down-up	35.65	24.18	14.23	17.18	20.92	27.31	20.94	19.38	18.12	others
CsaV3_1G003220	77.98	56.25	53.39	30.77	28.52	35.94	72.22	84.76	69.8	6.73e-05	0.844232	3.34e-09	down-up	2.75	5.8	4.31	2.06	2.7	2.34	5.02	5.06	3.97	others
CsaV3_1G003350	7.71	9.67	8.18	5.45	4.75	4.43	7.1	8.28	7.18	5.76e-05	0.812378	0.00500041	down-up	1.69	1.84	1.89	0.84	0.99	2.31	1.63	2.75	1.86	others
CsaV3_1G003690	49.5	50.4	50.47	26.09	27.75	29.6	55.91	46.65	46.03	1.42e-07	0.973496	2.33e-05	down-up	18.07	36.25	27.13	5.54	8.59	22.78	33.72	45.37	11.88	others
CsaV3_1G003790	17.19	29.85	29.51	17.08	19.67	17.45	28	22.81	32.09	0.0290161	0.968734	0.00248696	down-up	18.88	33.39	19.63	8.69	7.68	10.45	25.34	34.28	16.63	down
CsaV3_1G004140	174.16	88.84	94.47	80.21	49.78	64.38	132.73	140.3	119.42	0.0101072	0.97027	2.46e-05	down-up	32.56	48.11	40.61	12.99	10.29	21.28	48.55	59.79	31.37	down
CsaV3_1G004200	159.44	197.49	192.61	124.45	121.15	129.02	162.91	125.3	166.03	2.62e-05	0.546218	0.0484894	down-up	61.63	99.2	76.11	18.14	15.44	34.34	125.42	125.28	65.54	down
CsaV3_1G004230	132.97	90.89	119.49	57.71	39.39	61.21	152.83	164.37	123.62	4.27e-05	0.717187	1.13e-08	down-up	29.55	46.81	33.63	25.15	20.86	30.96	60.86	71.63	19.44	others
CsaV3_1G004330	14.35	33.94	42.53	6.68	4.15	13.26	45.06	57.76	79.44	0.000249804	0.16387	5.96e-13	down-up	4.35	4.48	4.01	3.8	1.94	1.72	4.07	4.73	6.42	others
CsaV3_1G004950	10.14	10.25	10.38	4.26	3.56	6.06	17.14	11.62	17.98	5.95e-05	0.273599	1.59e-08	down-up	3.31	2.93	2.73	0.92	1.94	2.81	3.75	2.73	1.82	others
CsaV3_1G005100	85.58	70.24	80.08	48.77	40.64	59.96	89.38	98.14	86.86	0.00275658	0.847644	9.26e-05	down-up	257.67	146.06	94.93	184.36	129.42	278.51	123.6	107.05	113.46	others
CsaV3_1G005120	27.13	24.88	23.74	21.53	14.47	23.74	38.44	35.68	36.23	0.0410188	0.609807	0.00129177	down-up	8.58	9.86	9.59	7.83	6.92	11.68	11.73	11.6	10.82	others
CsaV3_1G005220	48.23	61.54	61.64	23.36	27.56	31.4	84.07	61.7	107.71	6.12e-05	0.457586	1.05e-07	down-up	22.66	50.73	46.65	20.59	17.77	31.21	44.34	51.1	25.23	others
CsaV3_1G005250	44.91	61.5	52.21	30.98	33.31	41.07	70.87	37.7	67.61	0.0054563	0.954406	0.0102803	down-up	85.48	105.26	84.27	69.44	55.45	59.35	86.99	102.76	78.96	others
CsaV3_1G005600	253.45	153.93	130.32	21.13	14.75	14.8	137.16	125.41	117.7	1.17e-23	0.492925	2.64e-32	down-up	19.33	53.53	22.96	4.83	1.87	6	52.42	48.03	5.05	down
CsaV3_1G005660	1142.1	1137.58	1299.06	749.08	662.15	953.81	1203.19	1237.73	1837.92	0.00177877	0.819065	0.000301062	down-up	332.97	583.62	627.24	170.9	179.84	168.08	446.79	648.9	314.79	down
CsaV3_1G005680	102.42	84	106.9	59.19	52.85	64.37	85.35	105.32	99.15	0.00565	0.997752	0.00213057	down-up	59.91	48.03	36.15	29.89	44.04	48.03	48.63	42.19	43.59	others
CsaV3_1G006050	567.52	449.36	545.97	293.26	266	367.1	656.98	494.56	584.27	4.07e-05	0.998717	0.00166401	down-up	179.92	259.36	202.17	97.06	77.39	153.47	272.56	257.04	102.73	down
CsaV3_1G006370	197.91	99.22	128.39	46.37	23.98	48.71	167.02	204.27	195.82	2.02e-06	0.746241	5.36e-14	down-up	16.73	34.21	25.72	5.41	8.65	17	24.36	28.05	11.88	down
CsaV3_1G006440	117.98	86.07	107.9	50.46	23.25	48.86	163.2	101.53	89.14	9.13e-05	0.942926	2.07e-05	down-up	18.06	34.48	22.94	13.84	7.81	19.31	32.95	46.88	5.4	others
CsaV3_1G006520	69.73	28.91	35.34	36.02	26.71	25.18	69.37	72.27	42.72	0.0181835	0.724967	3.6e-05	down-up	6.88	4.31	4.97	13.14	8.09	9.1	6.09	5.12	4.47	up
CsaV3_1G007080	719.69	562.85	627.84	369.03	209.58	315.36	896.82	722.97	756.83	2.77e-07	0.723854	3.34e-09	down-up	197.69	295.2	242.56	80.98	68.49	152.6	363.66	325.27	111.49	down
CsaV3_1G007100	26.72	15.6	35.07	10.28	17.17	15.36	20.77	26.06	60.57	0.0244394	0.8393	0.00196597	down-up	3.24	4.07	3.6	3.91	3.62	3.09	3.68	7.55	1.52	others
CsaV3_1G007140	83.39	43.65	62.29	49.63	37.97	41.87	83.9	109.65	111.56	0.0442237	0.337063	1.26e-08	down-up	21.36	35.17	29.52	25.23	22.33	25.79	29.79	43.66	24.48	others
CsaV3_1G007230	6.45	11.31	9.99	4.85	6.22	7.65	15.46	7.04	11.44	0.0408596	0.878589	0.00925078	down-up	4.52	9.4	10.21	2.26	3.64	6.78	15.15	13.37	2.61	others
CsaV3_1G007410	61.82	22.65	31.16	13.34	9.6	24.72	65.85	59.53	46.09	0.0191265	0.70379	4.98e-06	down-up	5.12	10.92	3.27	5.19	8.45	3.14	8.59	25.8	1.43	others
CsaV3_1G007700	32.03	47.28	54.5	20.27	27	24.83	37.02	35.02	36.24	0.000406316	0.694024	0.00271379	down-up	5.14	12.59	6.27	3.23	3.91	4.2	9.14	15.94	5.28	others
CsaV3_1G007940	96.74	92.31	165.31	64.48	48.13	81.11	96.21	102.57	131.94	0.00581035	0.942926	0.00272204	down-up	13.22	32.05	33.82	30.16	18.02	28.96	29.46	55.91	11.45	others
CsaV3_1G007950	12.79	16.78	10.21	2.16	4.24	1.49	6.59	6.26	3.84	1.71e-08	0.0107198	0.0192977	down-up	0.54	2.15	2.1	0.59	0.84	0.71	1.38	2.38	0.87	others
CsaV3_1G007980	206.93	180.3	206.16	121.42	113.25	150.29	150.4	205.5	169.69	0.000748789	0.828855	0.0250795	down-up	45.83	94.58	58.92	18.15	27.54	68.09	95.14	122.12	22.01	others
CsaV3_1G008110	54.03	31.92	27.22	25.33	23.82	20.67	48.55	49.6	43.82	0.0251851	0.852668	1.69e-06	down-up	72.63	67.18	65.88	179.32	289.74	265.66	70.96	70.79	81.69	up
CsaV3_1G008420	59.73	62.03	63.14	43.75	50.56	53.94	70.7	57.27	67.58	0.0231716	0.976354	0.0260066	down-up	25.81	38.35	28.43	10.23	10.9	25.77	29.19	35.37	34.51	others
CsaV3_1G008570	34.86	23.67	15.55	7.71	8.34	5.25	18.78	24.96	15.02	6.58e-06	0.828353	2.63e-05	down-up	9.72	18.44	8.09	11.42	15.34	18.83	8.85	22.53	6.9	others
CsaV3_1G008630	145.76	225.9	243.71	83.56	104.04	128.49	163.29	149.76	179.99	0.000106987	0.596392	0.00151973	down-up	49.29	97.94	66.17	14.85	20.84	50.67	136.16	134.59	51.46	down
CsaV3_1G008970	11.19	7.24	6.68	0.88	0.83	1.42	8.74	10.45	10.84	6.93e-12	0.905232	4.17e-18	down-up	1.86	2.14	4.27	1.54	0.18	1.97	2.37	3.95	4.75	others
CsaV3_1G009060	12.2	6.91	6.5	5.28	2.79	5.13	16.88	16.1	12.78	0.0237548	0.277548	9.14e-08	down-up	0.58	4.02	1.54	1.59	1.6	4.57	4.51	6.93	2.99	others
CsaV3_1G009250	16.74	8.21	9.38	6.26	6.52	6.71	21.64	25.6	21.45	0.0240312	0.127813	1.43e-12	down-up	0.48	2.39	1.5	4.25	3.62	2.75	1.17	3.35	0.31	up
CsaV3_1G009330	41.61	55.92	60.99	26.33	31.85	31.99	60.86	50.11	55.78	5.99e-05	0.993491	1.06e-05	down-up	14.05	26.43	16.07	5.75	6.63	15.63	21.48	29.01	6.84	others
CsaV3_1G009350	218.28	234.7	230.35	125	129.25	155.88	407.96	282.64	344.33	1.16e-05	0.134037	1.79e-09	down-up	87.83	139.62	143.9	132.64	69.68	138	74.47	134.86	43.22	others
CsaV3_1G009540	4.64	4.09	5.71	2.71	3.72	2.27	4.37	4.4	7.21	0.0411724	0.970345	0.0305338	down-up	2.66	1.11	0.48	0	0.07	0.91	1.41	1.45	0.49	others
CsaV3_1G009750	3.98	5.23	5.99	0	0.79	0.79	4.16	5.62	4.62	0.000708781	0.980046	0.00151299	down-up	168.56	73.56	94.9	138.91	105.21	122.16	194.74	58.81	79.81	others
CsaV3_1G009900	47.67	38.17	49.97	29.87	21.64	31.48	64.03	69.39	54.15	0.00235	0.456528	1.34e-06	down-up	12.88	20.99	13.21	9.32	6.14	8.28	24.4	35.54	6.45	others
CsaV3_1G010170	91.49	77.44	66.14	43.92	52.86	58.21	70.06	70.53	67.38	0.00363671	0.82438	0.0124713	down-up	50.76	51.09	43.21	32.53	34.6	41.97	60.56	61.3	33.76	others
CsaV3_1G010260	18.02	23.11	24.78	5.42	7.28	8.1	16.86	16.54	16.14	3.15e-12	0.331638	1.99e-07	down-up	2.32	1.95	1.99	0.74	1.07	1.1	1.22	1.85	1.44	others
CsaV3_1G010620	1782.44	1116.14	1307.59	658.38	376.97	633.36	2049.72	1712.3	2063.01	1.94e-05	0.538526	3.68e-12	down-up	199.69	293.4	244.03	139.19	112.13	162.99	260.48	315.69	94.84	down
CsaV3_1G010690	13.13	9.73	9.55	2.07	1.29	0.79	4.73	4.47	4.34	1.51e-12	0.00173623	0.000281539	down-up	4.58	3.88	2.21	5	3.73	2.61	10	4.36	9.25	others
CsaV3_1G010740	167.89	52.43	60.02	56.12	26.8	38.55	64.33	131.41	56.89	0.0155004	0.95344	0.00547631	down-up	17.43	27.09	22.9	7.71	7.42	9.89	20.92	28.98	14.27	down
CsaV3_1G010750	1650.64	641.28	757.93	537.72	209.37	406.29	1210.44	1499.13	847.79	0.00273945	0.947539	6.43e-06	down-up	115.01	179.43	173.58	85.64	71.46	68.36	195.75	233.11	107.98	down
CsaV3_1G010780	929.87	750.12	852.92	191.85	154.1	357.13	456.46	625.02	626.85	1e-07	0.122216	0.000109342	down-up	106.12	198.45	183.44	88.66	122.22	104.1	305.34	319.7	90.56	others
CsaV3_1G010860	169.77	214.76	169.01	93.53	88.41	122.13	237.49	171.5	243.47	0.000738373	0.872958	7.93e-05	down-up	270.68	463.9	351.84	87.02	50.18	108.61	490.56	675.32	192.94	down
CsaV3_1G010930	45.32	37.93	31.25	15.23	18.47	14.51	26.15	22.14	18.85	1.41e-07	0.0678674	0.0248253	down-up	11.36	7.28	5.38	3.76	12.57	9.58	7.23	9.09	7.91	others
CsaV3_1G010960	12.67	9.55	9.78	8.81	6.4	4.82	10.04	12.56	8.84	0.02792	0.979982	0.0389216	down-up	21.11	15.84	14.52	4.43	12.63	8.9	13.99	11.62	17.04	others
CsaV3_1G011000	27.01	77.87	91.56	25.45	34.03	40.79	98.62	58.75	90.99	0.0462761	0.896806	7.42e-05	down-up	29.51	69.64	35.84	11.9	19	21.52	83.63	88.87	20.62	down
CsaV3_1G011330	5344.28	3209.63	3707.21	2002.32	1380.85	1761.85	4704.03	4233.75	4522.2	6.81e-06	0.979381	2.84e-11	down-up	771.68	955.87	944.76	423.4	256.61	479.21	1140.84	1412.73	345.42	down
CsaV3_1G011490	17.25	14.48	16.72	6.43	10.03	6.71	19.88	12.94	14.38	6.81e-06	0.9691	9.6e-05	down-up	1.36	1.6	0.83	0.69	1.05	0.77	1.82	2.01	2.72	others
CsaV3_1G011860	37.41	25.2	28.78	17.25	15.22	18.19	51.35	43.72	35.42	0.000720021	0.683584	2.44e-07	down-up	15.43	19.87	18.34	10.44	6.1	12.97	28.28	36.12	13.79	others
CsaV3_1G011910	9.08	14.08	18.01	5.82	6.15	8.08	16.61	11.11	16.84	0.00236013	0.938498	0.000158421	down-up	1.51	1.87	1.66	5.98	2.91	5.69	0.8	3.07	2.11	up
CsaV3_1G012180	39.53	26.37	29.94	8.24	7.79	12.73	38.19	37.98	27.33	1.26e-07	0.973698	5.03e-09	down-up	7.71	9.2	6.09	5.68	3.09	3.31	11.17	17.68	5.2	others
CsaV3_1G012290	280.48	206.48	177.11	142.04	118.47	126.22	289.43	268.45	222.43	0.000891164	0.88459	5.31e-07	down-up	106.96	184.81	129.67	28.76	27.72	69.3	182.83	215.5	75.12	down
CsaV3_1G012620	38.97	41.18	42.04	31.7	28.14	39	50.74	44.88	49.72	0.0252777	0.88009	0.00649526	down-up	6.22	6.85	3.05	2.27	3.28	2.48	7.26	7.21	3.87	others
CsaV3_1G012820	234.79	132.31	132.14	97.72	80.12	94.42	107.74	179.92	99.19	0.00276416	0.772379	0.0477739	down-up	57.18	82.55	67.56	35.62	33.57	38.34	74.58	90.59	52.83	down
CsaV3_1G012840	312.25	187.23	242.2	183.98	133.7	145.32	388.89	275.96	307.4	0.00943571	0.699221	0.000213519	down-up	205.4	198.95	108.61	142.06	199.15	173.82	264.36	198.82	142.32	others
CsaV3_1G012930	14.63	14.17	19.25	9.2	6.25	4.45	10.86	16.55	13	0.000792182	0.858127	0.0130586	down-up	2.8	7.46	8.95	2.37	3.47	5.29	7.96	16.88	7.97	others
CsaV3_1G013880	128.34	94.68	103.32	79.38	60.05	81.45	89	133.7	120.01	0.0107909	0.990322	0.00706115	down-up	30.87	25.7	31.23	23.56	24.07	18.91	24.36	29.21	19.46	others
CsaV3_1G013890	2.95	0.71	1.48	0.32	0	0.16	1.52	2.51	0.66	0.0182195	0.979832	0.0263241	down-up	0	0.09	0	0	0	0	0	0	0	others
CsaV3_1G014090	85.59	61.21	59.91	45.59	22.59	34.4	124.38	65.88	67.86	0.00241143	0.855389	0.000327621	down-up	21.05	12.67	12.55	33.48	26.14	30.68	18.83	15.88	24.77	up
CsaV3_1G014110	216.65	246.54	202.17	160.88	129.4	188.13	357.7	228.9	279.23	0.0217703	0.677237	0.00134073	down-up	66.95	85.24	62.5	115.83	84.8	107.76	85.1	76.03	102.62	up
CsaV3_1G014160	136.44	128.57	121.12	70.65	72.95	83.01	303.77	163.6	160.2	0.00017319	0.352047	6.98e-06	down-up	60.34	77.23	49.88	97.67	72.75	108.06	76.86	65.25	109.42	up
CsaV3_1G014370	24.54	34.79	32.61	21.5	23.4	23.26	40.51	32.3	33.49	0.000584369	0.947494	0.000996755	down-up	4.78	7.89	7.78	4	2.75	3.95	10.86	14.03	4.49	others
CsaV3_1G014400	1.86	0.93	3.45	0.45	0.84	0.6	1.53	3.27	3.66	0.0186311	0.898214	0.000512247	down-up	0.14	0.21	0.18	0	0.2	0	0	0	0	others
CsaV3_1G014580	677.35	671.77	668.93	289.4	288.34	355.86	874.5	652.64	1093.27	1.33e-10	0.61611	1.8e-10	down-up	219.39	310.02	271.38	73.36	77.94	88.09	366.23	323.22	133.68	down
CsaV3_1G014650	0.79	1.13	0.81	0.16	0	0	2.17	1.36	1.05	0.00642612	0.739086	0.000473124	down-up	0	0.32	0.06	0	0	0.28	0.27	0.06	0	others
CsaV3_1G014770	2.09	2.97	1.99	0.52	0.75	1.18	2.13	2.05	2.14	0.00697867	0.94515	0.0223003	down-up	0.07	0.2	0	0	0	0	0.2	0	0	others
CsaV3_1G015100	5504.7	4262.7	5223.05	2461.52	1909.38	2136.85	5866.3	4547.13	5637.99	6.64e-11	0.964746	6.05e-11	down-up	1525.58	2857.43	2385.39	602.26	332.74	859.37	2562.93	3676.12	826.8	down
CsaV3_1G015290	8.12	13.4	15.41	3.25	5.81	3.99	7.55	7.82	9.46	1.9e-06	0.24837	0.000933115	down-up	1.71	1.89	1.63	1.61	0.77	1.13	1.47	2.39	1.46	others
CsaV3_1G015440	73.4	120.38	150.99	55.71	79.08	82.94	116.66	99.12	125.12	0.0205918	0.985958	0.00246868	down-up	82.46	97.09	79.84	111.51	128.42	95.71	123.22	100.22	93.9	up
CsaV3_1G015490	88.76	57.28	70.35	50.02	29.99	59.42	100.81	127.14	108.22	0.00803707	0.148037	2.13e-07	down-up	16.86	23.48	20.81	16.45	7.82	13.92	30.91	30.76	14.46	others
CsaV3_1G015630	39.71	43.45	43.24	21.99	30.02	25.65	43.83	37.94	41.44	9.03e-06	0.946695	0.000167503	down-up	4.81	5.8	4.56	6.02	5.25	9.08	6.03	6.63	4.78	others
CsaV3_1G015650	98.51	94.37	80.66	54.86	70.5	49.86	86.86	90.5	92.25	0.000294306	0.968734	0.00021108	down-up	211	146.09	136.31	69.63	54.06	62.66	124.1	125.6	119.44	down
CsaV3_1G015710	75.71	93.02	93.82	64.37	63.39	83.02	132.95	106.91	114.55	0.0294109	0.436948	0.000261129	down-up	21.37	31.28	26.98	28.08	14.03	33.07	39.48	42.89	14.04	others
CsaV3_1G015760	92.08	59.95	31.5	7.42	13.67	10.12	60.86	57.08	29.42	3.62e-09	0.868114	3.87e-10	down-up	17.73	16.47	16.38	15	13.22	18.03	12.18	21.2	12.29	others
CsaV3_1G016950	80.72	32.33	24.1	7.63	4.72	6.86	21.81	39.44	24.13	2.64e-10	0.426642	1.66e-11	down-up	4.76	1.41	1.64	2.11	0.73	0.57	2.33	4.53	5.48	others
CsaV3_1G017100	435.71	372.07	243.59	135.78	164.12	107.97	330.8	278.89	157.65	1.06e-06	0.674992	0.0019571	down-up	47.69	55.51	46.75	63.93	37.86	71.2	59.22	69.93	41.82	others
CsaV3_1G017150	201.92	135.09	117.75	102.44	74.77	77.49	148.31	133.93	119.58	4.92e-05	0.802208	0.000272265	down-up	37.58	58.48	58.07	16.07	18.97	24.31	38.75	59.81	14.06	down
CsaV3_1G021840	292.05	310.25	325.81	207.2	195.99	258	519.52	469.39	427.52	0.00236285	0.0413169	8.51e-08	down-up	44.6	92.48	78.57	26.83	21.4	38.71	86.95	111.32	33.06	down
CsaV3_1G022900	9.09	7.85	8.19	4.02	3.84	4	16.58	20.8	14.45	0.000337021	0.0220626	2.1e-11	down-up	0.7	1.61	0.63	1.4	0.93	1.39	1.8	4.47	0.8	others
CsaV3_1G024140	34.25	46.58	67.37	15.06	25.91	24.19	67.32	42.54	66.15	4.88e-05	0.566282	3.58e-09	down-up	8.51	16.18	13.69	4.09	4.56	9.96	13.43	32.17	7.1	others
CsaV3_1G024160	18.4	18.69	16.82	12.14	15.39	13.16	20.58	19.47	16.82	0.0263552	0.948236	0.013798	down-up	5.78	9.75	6.02	2.26	2.06	3.19	5.38	8.48	8.27	down
CsaV3_1G024170	45.97	48.19	46.16	23.69	34.33	34.09	73.94	49.55	42.03	0.00320602	0.881055	0.00338734	down-up	15.39	28.34	22.13	6.32	11.91	9.43	39.71	43.83	22.45	down
CsaV3_1G025460	36.57	40.85	45.7	20.54	30.84	28.29	42.63	32.95	44.38	0.00320727	0.967213	0.0117569	down-up	17.13	19.42	11.53	21.17	20.04	23.9	21.41	26.93	10.71	others
CsaV3_1G026730	1.13	1.85	1.06	0.83	0.58	0.73	1.59	1.71	1.05	0.0407875	0.976354	0.0259402	down-up	0.24	0.58	0.05	0.11	0.18	0.4	0.27	0.33	0.04	others
CsaV3_1G027960	15.09	9.89	16.19	5.33	5.23	7.31	16.99	19.14	13.1	0.000137482	0.88459	3.21e-06	down-up	0.09	1.2	0.58	3.28	4.18	0.98	2.26	2.19	0.36	up
CsaV3_1G028060	61.93	102.03	86.39	38.39	53.25	68.93	66.67	81.7	80.24	0.0192566	0.907654	0.0361526	down-up	54.58	55.26	63.47	37.23	30.1	56.5	119.35	100.97	74.81	others
CsaV3_1G028300	7.29	6.61	5.29	3.59	2.32	4.37	3.31	8.09	8.39	0.0246354	0.980046	0.0382398	down-up	1.61	3.92	5.35	0.34	0.91	2.13	2.79	5.1	6.04	others
CsaV3_1G028370	98.22	95.64	104.48	70.37	58.38	73.44	87.91	97.14	93.78	0.00179284	0.900687	0.0172671	down-up	103.75	72.95	55.37	43.28	59.14	42.62	107.13	59.39	102.61	others
CsaV3_1G028400	1456.25	660.25	665.92	118.84	186.88	198.19	488.47	895.19	649.13	1.58e-10	0.710505	6.77e-12	down-up	22.81	6.21	7.2	11.56	13.09	23.7	21.48	4.11	17.58	others
CsaV3_1G028410	150.51	163.09	166.93	120.46	126.41	128.59	184.75	156.7	184.21	0.0125259	0.989754	0.015463	down-up	49.55	86.52	86.54	23.09	24.21	58.23	108.07	137.55	65.84	others
CsaV3_1G028840	23.81	10.16	14.25	4.74	3.6	4.8	11.67	20.2	20.29	2.18e-06	0.9869	4.73e-10	down-up	0.88	1.08	1.57	0.1	0.28	1.08	1.2	3.41	0.38	others
CsaV3_1G029000	72.85	78.91	84.53	53.75	63.99	74.22	147.17	90.85	120.65	0.0420175	0.20469	0.00012519	down-up	31.63	50.85	36.33	27.32	17.26	46.18	61.39	60.49	21.61	others
CsaV3_1G029010	11.43	15.39	10	5.85	6.62	6.82	16.89	19.53	15.96	0.000370852	0.480243	1.54e-08	down-up	1.22	2.39	2.13	4.7	3.07	1.53	1.73	4.95	1.15	others
CsaV3_1G029140	11.09	11.11	8.95	5.3	6.59	6.79	13.23	11.02	12.01	0.000949208	0.876754	2.96e-05	down-up	1.17	1.15	1.05	0.93	1.16	1.6	1.69	1.87	1.02	others
CsaV3_1G029170	56.82	30.04	46.08	30.91	13.12	27.43	45.3	54.83	39.33	0.0218673	0.991953	0.00383259	down-up	4.66	5.77	3.25	1.74	2.49	2.02	4.31	3.51	1.56	others
CsaV3_1G029200	903.58	1031.37	1029.1	674.78	750.77	877.61	1434.3	990.88	1627.54	0.0196742	0.507682	0.000573965	down-up	360.12	538.91	559.64	331.47	208.62	364.44	412.26	631.84	186.68	others
CsaV3_1G029220	152.1	142.78	172.26	57.15	43.22	63.44	140.57	156.47	125.14	3.95e-12	0.82438	7.28e-10	down-up	27.07	55.26	34.36	7.97	7.94	25.88	57.54	51.01	13.95	down
CsaV3_1G029250	4.79	12.35	6.77	1.74	2.51	1.91	7.55	4.24	5.27	5.11e-06	0.742707	3.31e-05	down-up	1.88	1.59	1.22	1.61	1.12	4.19	1.84	1.77	0.92	others
CsaV3_1G029290	110.17	114.35	104.57	59.2	39.25	46.64	164.05	111.37	121.96	7.18e-08	0.801256	1.25e-08	down-up	43.38	77.96	46.79	13.75	16.3	20.08	61.68	84.99	25.12	down
CsaV3_1G029420	36.3	27.91	35.76	28.45	24.08	24.75	29.96	34.86	34.01	0.0321932	0.975131	0.0321112	down-up	4.42	3.94	2	3.32	10.51	2.89	3	3.74	3.24	others
CsaV3_1G029510	96.07	96.86	94.66	65.36	60.43	82.4	95.13	103.06	101.67	0.00703827	0.985958	0.00570939	down-up	34.77	43.39	35.98	16.99	15.64	30.92	51.83	60.65	26.83	others
CsaV3_1G030840	146.91	81.26	91.17	60.81	34.45	45.18	150.82	170.75	94.7	0.000406316	0.820477	4.24e-07	down-up	23.53	49.9	30.54	15.9	9.22	27.45	39.73	54.61	15.48	others
CsaV3_1G030940	16.39	12.33	13.06	8.61	11.37	7.8	19.1	17.08	15.02	0.0378298	0.852668	0.00299848	down-up	7.35	9.95	8.39	5.61	10.01	5.68	10.29	9.57	12.19	others
CsaV3_1G031060	14.95	16.22	23.12	7.54	9.07	10.37	32.49	20.32	22.43	9.13e-05	0.605172	7.67e-08	down-up	2.67	0.74	0.98	0.54	0.41	1.2	1.84	1.55	1.1	others
CsaV3_1G031090	88.47	100.9	82.23	37.43	43.36	46.1	168.84	109.59	131.15	1.74e-09	0.223706	1.62e-13	down-up	29.21	40.28	36.76	15.02	10.5	25.18	25.86	34.66	23.32	down
CsaV3_1G031470	136.29	144.47	168.31	54.38	68.99	77.45	179.97	134.76	208.45	7.24e-09	0.873595	2.48e-09	down-up	34.88	80.02	44.8	11.15	7.65	29.76	60.04	70.59	5.88	down
CsaV3_1G032020	15.26	16.7	12.59	9.62	9.31	8.36	15.73	14.64	10.84	0.00249301	0.942926	0.0274949	down-up	3.68	4	4.29	1.22	2.06	5.89	6.46	7.8	11.02	others
CsaV3_1G032120	15.4	14.03	12.74	9.33	11.04	8.75	15.91	18.23	16.64	0.0169081	0.838089	0.00115169	down-up	6.21	9.31	7.85	6.6	3.67	5.51	12.24	11.46	8.07	others
CsaV3_1G032200	101.76	62.75	48.97	27.17	21.96	25.75	63.65	64.3	49.86	3.02e-06	0.833338	1.17e-08	down-up	15.74	20.53	10.59	6.55	4.17	7.16	15.91	19.03	10.27	down
CsaV3_1G032500	22.11	25.57	25.62	14.79	14.75	15.33	26.97	23.43	26.23	5.68e-05	0.995921	0.000199478	down-up	5.85	13.81	18.07	4.26	7.02	8.69	15.54	24.3	17.81	others
CsaV3_1G032510	3262.87	1948.57	2148.76	132.99	126.88	75.63	2878.51	2225.03	1770.29	1.56e-45	0.914436	1.06e-49	down-up	140.17	286.68	204.66	32.76	9.54	35.6	268.04	316.39	45.95	down
CsaV3_1G032720	73.9	97.87	102.76	50.21	62.56	75.16	104.75	89.18	122.42	0.0114649	0.928932	0.00120504	down-up	19.14	29.2	15.68	13.31	10.49	20.2	28.48	35.31	17.43	others
CsaV3_1G032850	5.8	18.12	10.8	2.38	3.62	2.46	7.34	3.72	5.61	1.3e-06	0.173814	0.00427654	down-up	1.09	2.14	1.7	0.25	0.37	0.56	0.84	0.39	0.31	down
CsaV3_1G032890	79.02	112.56	80.51	13.21	19.88	11.87	49.41	38.28	37.45	5.1e-25	0.000101477	1.35e-09	down-up	72.36	29.62	12.16	21.21	11.21	31.36	18.75	23.71	15.05	others
CsaV3_1G032910	45.41	49.34	54.97	20.25	15.41	32.67	59.57	58.44	49.32	0.000332373	0.909036	3.58e-05	down-up	2.55	5.73	2.21	5.5	7.74	4.53	4.67	9.71	3.72	others
CsaV3_1G033090	158.98	145.3	141.52	91.89	98.27	87.98	112.6	150.6	99.66	3.36e-06	0.692695	0.0438012	down-up	82.93	112.43	89.67	24.8	26.93	56.07	121.04	140.59	58.13	down
CsaV3_1G033430	33.44	39.92	36.64	30.69	29.54	29.85	39.76	38.34	37.03	0.0325424	0.993124	0.0197156	down-up	9.95	14.79	7.81	3.17	6.54	8.14	11.2	17.38	4.46	others
CsaV3_1G033760	15.44	15.77	18.21	7.4	6.84	9.12	23.05	21.08	21.2	1.89e-07	0.390989	1.09e-11	down-up	1.64	3.25	2.52	0.49	0.63	1.47	1.88	4.17	0.88	down
CsaV3_1G033870	200.54	138.25	134.83	115.29	73.12	93.43	173.82	184.52	156.07	0.00539027	0.9691	0.000144657	down-up	53.96	100.26	91.91	21.3	20.73	31.2	114.84	126.51	50.6	down
CsaV3_1G034040	33.67	32.67	32.32	21.84	22.37	25.23	33.25	33.42	36.63	0.00555172	0.98731	0.00584008	down-up	18.3	19.34	15.66	17.11	13.07	21.67	15.38	22.88	19.98	others
CsaV3_1G034060	16.83	18.6	24.74	10.99	11.04	16.29	38.92	29.94	36.05	0.0251899	0.0726671	2.96e-07	down-up	6.87	6.27	7.03	5.69	4.37	4.39	10.29	5.74	2.73	others
CsaV3_1G034090	66.08	99.93	95.61	39.89	60.59	53.28	73.59	80.75	81.75	0.0217048	0.916266	0.0466414	down-up	16.92	14.33	15.36	9.54	13.57	12.88	15.3	26.12	7.66	others
CsaV3_1G034310	123.44	122.8	179.74	63.28	76.7	94.88	275.31	239.61	238.64	0.000529965	0.0233699	1.65e-13	down-up	19.54	46.5	22.06	18.42	15.91	25.49	55.14	91.03	14.31	others
CsaV3_1G034340	51.54	88.36	65.58	48.67	49.53	40.25	70.9	61.51	75.55	0.0401172	0.995935	0.0177603	down-up	78.84	72.65	60.33	66.45	65.97	65.98	64.97	88.09	65.1	others
CsaV3_1G034470	22.65	12.87	16.88	7.45	4.01	4.72	24.18	32.24	21.1	4.79e-06	0.566282	7.7e-12	down-up	10.23	6.77	5.25	0.74	3.93	4.2	13.19	15.41	2.51	others
CsaV3_1G034500	59.35	35.88	40.01	39.16	33.56	46.49	67.91	71.86	57.35	0.0254073	0.824788	0.0020146	down-up	19.71	13.98	13.48	3.77	11.06	10.86	25.52	23.21	21.21	others
CsaV3_1G034530	107.87	38.72	47.7	44.37	20.47	35.36	62.92	97.83	57.29	0.0383699	0.971476	0.000968876	down-up	22.39	36.29	26.48	7.98	5.29	7.93	19.03	41.4	11.47	down
CsaV3_1G035770	404.7	1608.56	1228.15	172.17	445.1	230.87	815.05	297.71	750.75	0.000348766	0.569	0.0107139	down-up	0.76	2.14	0.45	0	0.24	0.67	2.24	2.31	0.66	others
CsaV3_1G036040	101.61	92.56	85.28	73.35	62.62	65.48	89.22	92.67	75.98	0.00119069	0.856458	0.026003	down-up	22.38	30.47	17.19	8.16	14.65	16.53	21.55	20.54	18.34	others
CsaV3_1G036050	3538.13	2254.47	2441.19	1107.95	703.17	1125.25	3320.66	3511.57	2340.46	1.36e-15	0.97027	5.64e-13	down-up	325.18	402.15	366.72	84.35	119.94	109.06	749.83	640.82	273.51	down
CsaV3_1G036070	133.55	60.26	70.63	62.8	28.52	49.43	114.2	134.26	78.77	0.0268937	0.896531	0.000273442	down-up	55.6	104.89	88.89	19.39	24.09	37.43	116.29	141.68	40.53	down
CsaV3_1G036220	9.22	13.48	14.25	6.34	6.96	9.56	19.19	12.55	15.77	0.0077148	0.720787	9.92e-05	down-up	1.92	3.37	2.61	1.23	1.26	3.74	4.64	8.24	0.79	others
CsaV3_1G036320	93.2	143.13	142.91	64.49	94.75	89.59	118.69	83.45	130.05	0.0016324	0.840292	0.0228695	down-up	88.25	107.66	82.48	45.38	42.8	53.49	122.58	127.4	61.9	down
CsaV3_1G036530	6.42	4.17	3.07	1.88	1	1.28	8.81	7.97	3.56	0.00151101	0.778731	1.63e-05	down-up	0.67	0.96	0.6	2.22	0.48	1.99	0.98	1.6	0.87	others
CsaV3_1G036560	94.64	126.91	117.38	61.43	72.13	93.15	166.9	107.95	155.84	0.00595921	0.690997	0.00019767	down-up	27.04	41.17	35.46	28.68	24.97	33.91	41.13	43.27	29.73	others
CsaV3_1G036580	28.76	55.92	49.08	15.12	14.71	22.15	61.42	32.94	63.66	0.000330078	0.929493	2.33e-05	down-up	27.26	26.96	44.68	9.06	9.11	10.51	79.64	65.62	30.73	down
CsaV3_1G036600	243.62	335.35	310.51	115.54	132.24	135.42	521.56	258.95	405.52	7.03e-11	0.696251	2.29e-09	down-up	371.71	403.53	272.27	162.58	229.55	238.84	450.84	482.31	330.38	others
CsaV3_1G036610	155.56	133.55	146.21	73.74	70.69	99.52	183.35	148.97	156.31	0.000100088	0.907654	7.36e-06	down-up	55.04	68.13	54.65	20.18	22.11	39.21	66.55	66.06	35.41	down
CsaV3_1G036680	2.62	4.1	1.19	0.29	0.28	0.14	1.69	1.33	2.3	0.00217935	0.819008	0.0187777	down-up	0	0.25	0	0	0	0	0	0	0	others
CsaV3_1G036710	0.43	0.3	0.28	0	0	0	0.64	0.35	0.28	0.0220918	0.968734	0.0104837	down-up	0	0	0	0	0	0	0	0	0	others
CsaV3_1G036810	96.55	101.56	118.62	67.69	48.69	26.12	170.44	135.57	138.08	0.0262468	0.75707	0.0010647	down-up	124.88	157.24	151	129.38	147.03	120.61	161.74	182.3	144.99	others
CsaV3_1G036850	59.66	35.25	34.24	20.38	17.88	25.68	48.16	55.88	41.32	7.95e-05	0.967955	2.96e-07	down-up	13.77	23.29	12.89	12.3	6.78	8.33	29.98	34.38	7.63	others
CsaV3_1G037290	18.02	14.5	19.72	6.15	8.4	9.87	20.61	18.15	18.33	1.62e-05	0.952075	2.79e-07	down-up	0.06	0.56	1.75	0.71	1.21	1.54	2.52	3.65	0.08	others
CsaV3_1G037510	299.27	125.13	118.33	68.86	42.41	72.26	174.91	236.14	167.98	0.000278336	0.990973	4.7e-09	down-up	94.65	180.14	124.5	36.03	58.39	39.9	295.95	221.87	98.49	down
CsaV3_1G037630	33.41	23.69	27.34	10.34	14.26	17.47	42.93	35.42	30.89	0.00106361	0.743869	5.76e-06	down-up	14.51	28.1	18.75	8.65	7.75	26.12	21.84	33.95	14.25	others
CsaV3_1G037750	142.03	134.51	148.66	99.39	92.3	129.95	201.52	166.81	209.13	0.0264618	0.308317	9.86e-05	down-up	30.66	62.27	54.83	30.54	17.07	30.65	60.99	73.54	25.67	others
CsaV3_1G037900	140.92	142.12	168.66	62.66	57.67	81.17	151.35	158.12	206.78	2.23e-08	0.8727	1.52e-09	down-up	44.11	70.99	72.36	13.06	13.37	29.97	60.57	71.61	27.69	down
CsaV3_1G038250	30.13	32.74	40.03	19.55	14.84	22.44	35.73	31.3	33.62	0.000274949	0.968734	0.000375581	down-up	13.23	11.96	10.27	33.95	30.3	30.94	11.24	11.44	8.16	up
CsaV3_1G038260	43.91	36.75	38.75	12.99	7.38	13.62	22.11	45.19	38.33	4.08e-09	0.899968	7.81e-06	down-up	294.02	142.43	176.71	457.66	409.17	572.26	134.23	58.99	205.63	up
CsaV3_1G038510	5.22	22.81	23.32	0	0	0	6.41	1.21	11.31	3.18e-07	0.437539	0.000345558	down-up	4.48	7.63	2.18	0.36	0.39	2.42	11.55	5.92	2.11	others
CsaV3_1G039070	9.25	7.52	9.63	5.48	7.49	6.12	10.41	10.44	8.71	0.0262663	0.927065	0.00544771	down-up	2.89	2.86	3.04	2.41	3.35	4.61	4.74	3.87	3.42	others
CsaV3_1G039120	6.81	4.78	1.76	0.19	0.19	0.19	5.38	9.57	6.22	0.000142564	0.786287	7.75e-07	down-up	1.05	0.5	1.87	0	0.38	0.17	1.41	0.48	9.17	others
CsaV3_1G039150	31.58	38.85	43.62	25.13	25.71	34.13	53.15	34.57	36.28	0.0357358	0.962016	0.0297758	down-up	2.71	9.67	5.38	5.06	2.46	4.77	9.49	23.74	1.27	others
CsaV3_1G039580	63.49	64.47	57.84	48.02	46.1	52.15	70.29	70.82	61.4	0.0155119	0.969821	0.0154708	down-up	26.64	25.01	23.73	24.97	18.86	22.26	30.96	30.64	35.26	others
CsaV3_1G040020	36.49	29.95	24.52	19.19	20.96	16.32	24.65	29.72	23.96	0.00270883	0.829264	0.0192371	down-up	26.36	25.43	21.74	23.94	18.69	21.91	29.5	27.37	22.28	others
CsaV3_1G040390	23.5	22.63	27.08	16.79	14.75	18.82	112.36	73.99	60.66	0.00999975	1.66e-06	8.91e-15	down-up	12.59	31.81	15.81	3.54	4.81	10.83	48.76	60.88	16.99	down
CsaV3_1G040470	7.79	10.59	10.7	5.92	7.6	7.18	10.13	7.64	10.53	0.00792937	0.968734	0.0258914	down-up	1.24	2.59	2.77	1.04	1.1	1.84	2.21	3.38	2.41	others
CsaV3_1G040650	321.41	367.55	434.85	226.81	263.26	338.84	307.17	342.28	558.79	0.0295988	0.976354	0.0386397	down-up	108.86	191.96	227.27	67.47	55.4	64.46	202.54	269.76	124.62	down
CsaV3_1G040810	2632.38	2444.79	3381.73	1364.53	1357.09	1450.8	3545.75	2040.35	2912.47	1.92e-07	0.997347	5.11e-05	down-up	1442.99	2908.17	2333.04	689.7	581.36	554.92	2668.15	3569.98	697.25	down
CsaV3_1G041230	565.53	672.29	786.52	371.25	372.28	454.4	878.78	680.3	962.54	4.24e-05	0.694952	1.29e-07	down-up	177.88	261.75	234.74	51.9	55.07	84.96	201.01	268.05	91.36	down
CsaV3_1G041340	50.6	45	42.13	30.51	34.22	31.5	43.06	50.09	40.7	0.000379155	0.909628	0.00807068	down-up	16.17	21.27	16.66	9.48	11.68	15.67	15.03	18.27	13.6	others
CsaV3_1G041640	64	60.7	62.21	42.5	48.69	46.17	58.19	60.63	67.91	0.00120782	0.978161	0.00482767	down-up	18.24	37.6	22.3	15.83	14.07	21.67	54.83	64.71	6.4	others
CsaV3_1G041780	178.42	164.26	179.37	86.41	59.98	85.11	159.06	173.69	163.32	6.41e-11	0.912013	8.74e-09	down-up	48.46	80.18	39.96	6.25	5.75	32.3	64.24	95.83	20.25	others
CsaV3_1G041790	6.87	6.49	4.94	2.38	2.92	2.39	4.14	3.83	4.65	1.16e-05	0.390989	0.0121331	down-up	0.52	0.69	0.12	0.11	0.19	0.68	0.38	1.65	0.34	others
CsaV3_1G041810	186.27	232.29	203.7	102.42	136.75	125.2	210.5	183.96	187.97	6e-08	0.827579	4.64e-05	down-up	67.15	103.08	75.85	23.17	25.91	46.77	97.45	137.97	48.29	down
CsaV3_1G041840	21.95	25.29	29.18	15.28	18.53	20.77	19.94	24.99	26.55	0.00806189	0.921225	0.0493862	down-up	34.48	36.83	33.11	16.91	21.35	21	25.22	30.21	23.51	down
CsaV3_1G042250	4.88	7.89	3.51	1.3	1.02	1.34	3.81	3.87	3.21	7.78e-08	0.533421	6.16e-06	down-up	0.34	0.93	0.58	1.42	0.73	2.56	0.07	0.73	0.44	others
CsaV3_1G042600	68.72	73.46	55.2	18.41	28.62	22.4	200.35	120.36	99.14	1.23e-10	0.0181629	3.47e-18	down-up	40.74	45.28	33.89	5.85	9.46	9.05	69.79	77.64	43.72	down
CsaV3_1G042610	42.75	76.93	63.47	21.54	17.74	14.2	57.25	31.21	40.68	5.25e-06	0.689404	0.00306779	down-up	17.11	12.74	8.29	21.48	18.07	15.71	6.51	8.65	14.2	others
CsaV3_1G042820	170.04	147.8	160.74	91.6	66.73	91.27	227.25	168.1	256.09	1.02e-05	0.477133	1.46e-08	down-up	62.21	90.66	81.46	26.66	16.58	31.85	93.14	131.91	65.05	down
CsaV3_1G042840	12.4	25.01	20.77	6.63	13.81	10.26	24.66	12.73	18.56	0.0103584	0.976625	0.0135105	down-up	4.87	8.05	5.73	0.61	0.9	8.81	8.36	13.68	5.33	others
CsaV3_1G042860	238.81	129.69	145.93	127.26	69.47	98.37	169.4	257.45	162.46	0.006497	0.942926	0.00022307	down-up	84.91	90.96	77.7	45.89	39.29	59.7	67.57	74.41	76.31	down
CsaV3_1G043170	604.48	340.57	377.45	227.23	114.43	191.37	403.97	491.63	440.33	0.000201109	0.990973	2.2e-06	down-up	93.88	189.57	116.52	32.01	44.27	49.57	161.27	209.5	61.01	down
CsaV3_1G043710	3367.32	1127.23	1620.65	658	256.23	325.82	2000.54	2505.04	1967.12	2.53e-06	0.992636	2.4e-12	down-up	863.03	1523.45	1154.06	338.49	161.7	617.82	1365.35	1935.36	276.42	down
CsaV3_1G044000	1863.27	1625.35	1824.12	575.46	622.16	565.14	1932.25	1387.04	1556.92	8.25e-24	0.87753	3.97e-15	down-up	208.21	263.79	348.11	201.82	203.39	148.17	331.9	383.49	279.62	others
CsaV3_1G044150	245.61	288.9	309.23	200.98	170.22	244.35	339.24	272.72	391.14	0.0136356	0.794619	0.00124852	down-up	76.41	132.87	106.84	25.84	30.92	41.78	104.53	141.53	53.48	down
CsaV3_1G044450	498.73	512.66	575.82	352.56	341.74	431.65	501.12	528.38	494.71	0.00169312	0.934778	0.00949213	down-up	177.33	229.64	251.74	69.35	40.89	81.4	159.04	213.65	81.21	down
CsaV3_1G044520	3.75	5.19	4.96	2.48	2.76	2.51	4.35	4.09	4.63	0.000154355	0.949353	0.000904361	down-up	0.26	0.4	0.62	0.41	0.36	0.31	0.71	0.5	0.57	others
CsaV3_1G044940	44.26	32.73	33.95	27.33	22.54	32.05	57.66	61.25	44.65	0.03233	0.331638	1.91e-05	down-up	8.1	11.74	12.62	6.73	4.7	11.14	13.17	17.35	4.93	others
CsaV3_1G045010	211.02	187.16	189.25	124.5	128.05	149.06	189.74	174.86	277.69	0.000877393	0.960547	0.00204369	down-up	58.59	82.96	66.81	28.62	25.17	36.34	74.81	88.87	27.21	down
CsaV3_1G045040	131.28	82.13	76.04	66.26	46.6	50.72	102.85	101.58	70.17	0.00468269	0.961139	0.00256982	down-up	58.98	62.62	52.99	14	20.36	34.67	54.46	72.11	67.23	down
CsaV3_1G045110	26.51	31.14	31.39	19.82	21.12	24.94	38.01	23.78	31.07	0.00693395	0.990973	0.0255893	down-up	11.69	14.69	15.31	15.27	11.63	14.86	17.57	20.26	9.52	others
CsaV3_1G045540	9.13	4.85	6.74	5.16	2.3	4.17	10.46	9.43	8.61	0.047736	0.724833	0.000246451	down-up	1.14	3.54	3.07	1.45	0.94	2.38	1.65	2.43	1.98	others
CsaV3_1G045560	419.16	367.06	376.5	337.81	228.99	321.36	639.81	591.31	467.3	0.0454378	0.192897	6.7e-05	down-up	101.73	177.7	170.28	73.96	54.89	65.37	220.39	273.11	96.86	down
CsaV3_1G045680	221.75	132.01	154.73	121.24	63.07	111.67	188.07	209.82	155.15	0.0178782	0.97027	0.00171054	down-up	36	64.13	57.22	13.05	21.86	22.21	47.9	69.95	24.83	down
CsaV3_1G045740	56.02	34.35	36.96	19.34	24.72	16.04	25.74	29.03	27.78	0.000186489	0.233778	0.0282216	down-up	33.48	26.9	15.82	26.65	54.27	50.4	29.83	22.22	21.25	up
CsaV3_1G046220	160.52	163.81	152.91	102.47	98.42	134.57	152.04	146.86	171.68	0.0205918	0.977839	0.0423154	down-up	53.35	77.09	75.47	57.71	65.8	44.7	64.7	86.59	48.14	others
CsaV3_1G046260	101.19	91.76	99.04	76.78	67.22	83.52	122.95	110.23	114.09	0.0159059	0.742707	0.000521439	down-up	21.16	38.88	32.29	11.8	8.04	20.74	45.38	48.77	13.71	down
CsaV3_1G046290	1.21	0.4	1.24	0.12	0.12	0.12	0.51	2.93	1.24	0.0398527	0.87211	0.00740953	down-up	0.97	0	0.52	0.51	0	0	0	0.09	0	others
CsaV3_1G046450	35.48	44.97	51.62	15.72	27.6	24.1	58.96	34.68	48.44	0.000419489	0.972625	0.000366574	down-up	40.61	38.25	25.94	26.86	29.51	50.55	31.16	43.84	13.22	others
CsaV3_1G046680	5696.16	3264.5	3338.19	2279.12	1243.26	1504.94	5427.49	4838.36	3280.14	1.45e-13	0.973778	9.22e-08	down-up	1009.74	1893.89	1543.96	483.51	352.61	524.54	1596.99	2482.7	493.94	down
CsaV3_2G001110	61.26	74.5	70.61	35.76	35.25	39.94	89.01	65.36	92.03	9.69e-08	0.798784	4.9e-08	down-up	36.18	59.58	43.15	15.48	19.02	29.86	65.53	72.17	30.14	down
CsaV3_2G001200	50.92	39.16	36.37	27.62	26.76	28.01	52.42	41.42	34.96	0.00503413	0.996919	0.00650923	down-up	26.92	29.86	32.1	25.08	37.2	31.48	18.12	30.77	27.94	others
CsaV3_2G001260	9.29	8.93	10.99	6.95	7.01	7.66	10.89	10.92	9.84	0.0221493	0.962098	0.0118983	down-up	4.02	4.83	5.23	3.33	5.27	6.62	4.8	5.55	4.95	others
CsaV3_2G001270	1783.94	2549.56	3008.18	689.21	872.17	870.75	3156.35	1605.17	3277.67	4.52e-09	0.9691	2.13e-08	down-up	657.88	984.36	1019.39	366.92	270.8	343.99	1248.67	1344.13	525.69	down
CsaV3_2G001380	33.25	30.98	29.73	27.87	24.76	25.79	36.18	37.49	35.03	0.0310672	0.838384	0.00274718	down-up	7.93	8.36	5.62	19.56	16.49	17.81	5.25	7.77	6.97	up
CsaV3_2G001480	153.25	323.18	279.86	104.11	179.85	149.65	230.9	161.65	230.34	0.00717476	0.802208	0.0196777	down-up	52.68	100.82	64.38	12.1	12.09	29.79	78.49	92.39	34.84	down
CsaV3_2G001520	153.76	148.12	164.15	81.14	86.43	125.19	225.48	204.75	235.62	0.00239389	0.0951709	3.6e-07	down-up	57.57	76.58	72.02	25.27	18.84	32.35	81.41	84.22	46.99	down
CsaV3_2G001650	25.42	15.98	15.48	8.31	6.54	7.79	8.1	18.33	13.91	3.79e-05	0.665017	0.0201425	down-up	22.23	20.78	16.13	10.61	15.79	4.12	39.48	21.42	14.17	others
CsaV3_2G001740	2.37	1.51	1.41	0.17	0	0.34	0.9	2.39	3.34	0.0131051	0.957191	0.00729338	down-up	0.49	0	0.77	0.44	0	0.16	0	0.56	0	others
CsaV3_2G002080	241.02	174.5	196.5	141.25	130.06	174.92	190.93	229.28	262.08	0.0265117	0.942926	0.00280035	down-up	48.08	53.63	55.66	28.14	25.64	27.98	51.34	63.9	31.22	down
CsaV3_2G002860	411.09	382.66	419.98	239.86	220.67	287.01	430.41	446.15	518.91	7.11e-05	0.82438	3.55e-06	down-up	157.26	270.08	247.52	46.5	61.33	72.01	220.44	307.61	102.42	down
CsaV3_2G002960	62.12	65.69	69.99	57.42	47.1	44.69	70.03	74.31	83.86	0.0215279	0.858545	0.0037869	down-up	119.62	81.37	88.84	76.25	84.91	58.88	99.2	72.45	92.47	others
CsaV3_2G002980	462.24	348.6	398.43	278.71	190.69	288.7	507.51	413.39	445.99	0.00406206	0.907654	0.00017921	down-up	118.94	174.5	151.16	92.73	61.49	87.34	159.56	191.13	83.87	others
CsaV3_2G003280	434.75	487.63	276.98	22.25	106.26	15.87	263.98	185.98	143	5.34e-07	0.0378948	0.0266053	down-up	11.73	7.84	6.74	9.7	9.58	15.22	11.76	6.66	9.79	others
CsaV3_2G003300	70.84	64.76	58.46	12.16	15.46	16.09	51.84	54.5	41.25	5.68e-25	0.404981	9.16e-15	down-up	7.69	9.8	10.29	10.41	8.04	9.97	8.27	11.34	11.72	others
CsaV3_2G003320	42.94	50.72	45.01	24.97	34.01	28.2	135.38	96.63	87.58	6.35e-05	0.000142318	7.79e-15	down-up	12.78	24.33	14.93	7.05	7.49	13.87	32.57	41.75	15.04	others
CsaV3_2G003410	23.84	13.08	11.27	3.46	3.22	5.82	15.8	19.14	17.51	5.51e-06	0.979982	1.14e-10	down-up	0.2	1.1	0.06	2.54	2.26	2.93	0.45	1.18	0.34	up
CsaV3_2G003460	145.84	138.93	148.67	90.98	82.09	101.47	134.35	127.79	151.16	5.16e-05	0.907654	0.00059351	down-up	78.18	90.72	73.07	12.39	13.77	29.68	79.06	77.34	37.46	down
CsaV3_2G003500	5.79	6.05	3.31	2.09	1.34	1.77	4.18	4.48	3.95	7.14e-05	0.845032	0.000213906	down-up	1.59	2.3	1.74	0.78	1.66	4.8	0.09	1.81	4.6	others
CsaV3_2G003530	15.14	15.93	18.04	9.29	8.78	11.11	29.52	16.91	18.9	0.000740673	0.713726	0.000120057	down-up	3.61	10.19	5.38	1.98	5.87	2.5	8.24	10.32	3.01	others
CsaV3_2G003570	44.36	42.05	37.45	28.83	30.33	22.29	86.21	58.1	56.18	0.00161707	0.180921	2.66e-07	down-up	28.83	32.45	20.17	19.35	18.29	21.28	20.47	25.65	21.97	others
CsaV3_2G003590	127.48	90.96	89.06	51.55	42.84	65.23	133.75	147.94	184.86	0.000442845	0.301535	2.11e-10	down-up	21.26	24.56	23.29	26.65	19.81	19.88	16.68	25.18	20.77	others
CsaV3_2G003650	33.17	14.52	12.62	6.97	6.71	10.01	31.22	41.24	26.48	0.00202376	0.690997	5.41e-12	down-up	6.77	8.69	5.59	6.63	6.64	6.39	6.88	12.49	6.45	others
CsaV3_2G003960	41.25	40.42	41.52	26.5	25.65	28.27	52.4	46.93	41.87	1.37e-05	0.881662	2.97e-05	down-up	6.37	11.05	7.73	6.11	5.19	6.62	10.24	12.83	4.3	others
CsaV3_2G004170	207.38	122.81	140.89	115.21	67.97	109.63	178.75	225.7	180.82	0.00101623	0.816895	2.19e-06	down-up	50.27	78.88	53.59	62.31	63.67	54.92	76.81	101.68	38.14	others
CsaV3_2G004240	1044.07	635.22	811.24	648.46	394.07	571.58	1436.81	1223.51	1025.2	0.0225065	0.424358	2.99e-06	down-up	152.61	249.99	297.78	151.6	107.68	142.31	302.87	362.36	134.61	others
CsaV3_2G004300	36.84	36.76	43.8	20.63	18.58	27.4	54.16	41.42	40.12	0.000638882	0.881243	0.000127459	down-up	13.78	24.01	16.69	8.27	3.97	10.04	36	29.23	15.65	down
CsaV3_2G004360	805.2	571.75	576.76	373.86	314.61	428.89	754.71	459.17	522.41	4.74e-05	0.748721	0.0176955	down-up	64.48	88.98	76.24	67.43	55.22	65.2	100.94	123.77	38.94	others
CsaV3_2G004420	99.52	37.91	39.94	10.88	7.69	10.92	87.05	102.48	65.42	2.21e-09	0.7736	1.42e-29	down-up	8.18	10.55	7.23	3.01	4.07	4.74	11.23	18.13	7.58	down
CsaV3_2G004890	5.9	6.5	8.54	4.42	5.9	4.86	6.93	7.06	7.13	0.0161894	0.992682	0.0104466	down-up	1.77	3.03	2.4	0.32	0.52	0.74	2.98	4.85	1.57	down
CsaV3_2G004910	521.53	270.69	337.98	213.41	92.09	180.08	572.2	534.93	369.35	0.00250942	0.800859	2.16e-06	down-up	117.52	173.46	163.85	72.14	47.1	93.53	149.18	166.35	49.74	down
CsaV3_2G004960	18.06	15.11	17.45	5.42	7.13	7.34	19.75	15.44	18.31	3.5e-07	0.985319	2.63e-07	down-up	3.94	7.22	4.29	4.1	3.13	5.21	13.16	14.27	2.56	others
CsaV3_2G004990	21.85	28.65	23.5	6.64	10.28	10.99	20.91	15.38	17.03	5.08e-08	0.302492	0.000583612	down-up	4.74	9.15	5.03	2.6	2.37	5.5	5.16	9.32	2.81	others
CsaV3_2G005330	42.8	38.59	41.45	32.72	29.84	34.75	53.92	54.23	48.91	0.0178787	0.541142	0.000134208	down-up	15.23	27.98	23	14.39	13.24	20.91	24.36	34.46	17.33	others
CsaV3_2G006590	196.74	146.14	131.39	64.42	74.87	39.78	185.12	128.67	171.63	5.52e-06	0.995935	2.37e-06	down-up	46.55	43.01	21.94	60.15	45.46	92.15	33.43	26.49	41.4	up
CsaV3_2G006780	34.14	14.47	15.58	10.45	3.71	9.36	32.24	41.96	28.98	0.0072065	0.583252	1.25e-07	down-up	10.94	13.86	12.93	6.68	3.39	16.86	10.58	19.34	2.52	others
CsaV3_2G007270	9.46	5.67	3.93	2.72	3.3	1.62	6.46	5	5.15	0.00978104	0.922353	0.0106749	down-up	0.54	1.03	0.8	1.43	0.69	0.95	0.53	1.63	0.58	others
CsaV3_2G007280	16.43	8.67	11.14	7.82	6.14	7.54	8.17	12.56	13.89	0.0172192	0.96638	0.0142281	down-up	8.5	10.79	7.03	2.24	6.6	7.6	7.28	8.31	6.92	others
CsaV3_2G007480	29.56	24.08	22.88	10.91	14.29	11.5	59.52	43.47	45.08	1.13e-05	0.0161285	2.53e-16	down-up	30.78	35.65	22.65	14.23	14.68	22.64	43.55	58.6	16.1	others
CsaV3_2G007680	122.45	81.61	82.74	43.51	32.41	54.29	68.87	100.54	138.89	0.000140578	0.984762	4.84e-05	down-up	21.18	18.55	14.9	23.38	23.25	26.16	16.64	16.11	19.66	up
CsaV3_2G007950	71.78	59.66	52.77	23.57	33.18	29.2	97.17	72.61	118.13	2.64e-05	0.293459	3.77e-10	down-up	12.06	5.94	3.85	12.52	5.31	5.69	16.18	10.66	11.86	others
CsaV3_2G008220	23.89	36.99	33.01	9.07	10.96	12.88	93.12	73.95	61.59	2.43e-08	0.000343925	2.82e-24	down-up	32.66	46.04	40.21	12.44	7.83	18.56	87.61	98.31	38.85	down
CsaV3_2G008280	112.16	47.69	47.96	48.57	21.39	36.28	76.14	75.1	52.75	0.0321776	0.981287	0.00421587	down-up	37.93	60.01	40.18	16.76	17.07	22.04	32.53	56.76	19.63	down
CsaV3_2G008420	45.71	49.01	56.87	38.82	37.3	38.06	61.02	45.97	61.44	0.00432887	0.931845	0.00252132	down-up	11.67	20.07	18.6	9.14	6.84	16.21	12.41	21.93	9.56	others
CsaV3_2G008490	34.75	26.11	33.09	20.92	14.39	25.09	43.93	42.27	35.55	0.0170854	0.644494	0.000125779	down-up	7.17	12.3	10.61	6.49	4.64	8.66	15.68	14.97	7.76	others
CsaV3_2G008500	37.56	21.3	14.85	13.61	12.27	14.12	18.78	32.01	25.53	0.0188748	0.999669	0.00067961	down-up	15.8	31.68	27.9	8.31	7.72	11.23	18.65	38.44	30.22	down
CsaV3_2G008540	131.59	75.9	90.85	32.41	23.42	25.6	237.49	150.07	133.2	4.83e-09	0.261865	2.04e-16	down-up	42.14	86.68	44.33	21.12	13.93	34.88	57.26	105.52	18.8	down
CsaV3_2G008690	83.84	68.79	81.25	55.13	63.4	64.44	85.03	100.73	87.67	0.0153557	0.841885	0.000760989	down-up	32	33.93	27.44	23.38	34.67	40.67	43.28	45.07	37.06	others
CsaV3_2G008720	148.08	162.5	144.94	116.57	100.81	126.53	341.75	245.95	230.46	0.00662352	0.0172893	5.95e-08	down-up	125.65	210.78	126.39	86.77	46.11	118.83	423.51	406.22	129.76	others
CsaV3_2G008800	13.07	15.64	17.12	5.53	5.9	7.84	20.37	15.11	22.11	9.87e-07	0.734737	1.24e-08	down-up	6.43	9.15	7.51	1.86	3.1	4.6	14.19	9.2	6.57	down
CsaV3_2G009000	17.96	21.91	23.41	8.99	14.98	12	24.85	19.01	18.67	0.00133483	0.998717	0.0023646	down-up	3.66	8.21	4.31	3.73	3.07	9.59	6.24	12.16	4.93	others
CsaV3_2G009420	32.37	19.88	19.72	3.41	4.99	5.23	21.31	22.46	16.08	1e-12	0.826299	3.66e-13	down-up	11.58	17.03	12.94	0.96	2.44	7.65	15.46	22.77	2.27	down
CsaV3_2G009510	134.81	82.84	101.52	71.45	52.86	80.08	155.12	116.72	145.44	0.0208175	0.709024	5.17e-05	down-up	50.21	63.23	74	28.37	40.96	32.7	62.83	85.39	47.72	others
CsaV3_2G009680	6947.8	7472.38	8507.65	3479.86	3279.59	3532.84	7189.46	5258.49	8716.08	1.33e-14	0.903985	8.34e-07	down-up	1382.43	1730.92	1780.63	509.09	450.03	438.71	1784.04	2019.01	608.34	down
CsaV3_2G010090	4088.25	2184.45	2300.2	1644.81	1024.16	1115.08	2705.37	3290.68	3290.27	0.000302091	0.976354	2.6e-08	down-up	422.9	522.53	544.75	251.41	169.04	240.89	622.12	769.32	240.85	down
CsaV3_2G010110	90.28	29.87	56.09	17.14	11.39	27.34	78.51	125.27	72.77	0.000623107	0.644494	4.27e-10	down-up	5.56	10.27	6.31	7.19	3.14	15.4	8.72	15.98	1.49	others
CsaV3_2G010120	56.77	87.87	98.39	39.78	43.91	53.27	58.8	47.98	95.58	0.000865964	0.827579	0.038717	down-up	17.04	28.94	21	6.08	3.78	14.26	30.77	37.14	14.79	down
CsaV3_2G010280	13.2	16.43	13.54	10.56	8.83	10.21	13.55	12.17	13.37	0.0025807	0.847392	0.028751	down-up	6.61	8.45	6.3	14.64	10.39	13.71	9.76	7.37	9.66	up
CsaV3_2G010800	11.43	18.95	5.84	2	0.77	0.46	14.55	8.14	3.93	2.68e-07	0.863609	1.54e-05	down-up	6.63	9.53	2.66	7.49	3.52	24.77	1.12	4.89	9.35	others
CsaV3_2G010960	8.37	7.14	9.66	4	4.85	3.91	8.76	8.69	5.95	4.86e-05	0.944209	0.00193033	down-up	1.89	0.99	1.19	2.29	3.63	4.02	0.99	1.38	1.56	up
CsaV3_2G011150	136.19	147.09	154.81	54.25	68.96	47.73	121.91	119.35	95.99	8.32e-15	0.368555	1.78e-06	down-up	106.35	76.33	40.51	63.12	81.3	127.67	65.59	73.23	91.07	others
CsaV3_2G011770	15.63	17.05	14.93	5.98	7.55	8.82	14.9	14.47	21.09	1.07e-05	0.983443	3.28e-05	down-up	0.79	2.05	1.68	2.3	3.4	1.43	3.18	2.43	1.88	others
CsaV3_2G012010	23.71	44.73	26.45	6.79	16.54	8.47	62.3	25.51	37.31	4.32e-05	0.820445	5.38e-07	down-up	0	0	0	0	0	0	0	0	0	others
CsaV3_2G012050	20.19	15.07	22.66	6.84	10.17	10.44	20.3	24.71	24.85	0.000173188	0.844232	3.58e-07	down-up	1.37	0.72	0.39	0.77	0.63	0.96	0.85	1.58	0.47	others
CsaV3_2G012390	163.26	190.47	217.24	139.85	153.49	181.51	238.99	210.81	242.17	0.0358723	0.80042	0.00142217	down-up	68.77	114.38	88.23	33.63	37.57	78.37	144.48	146.87	55.56	others
CsaV3_2G012400	19.28	18.16	17.6	7.23	5.55	8.35	22.34	20.54	17.66	1.56e-06	0.951028	9.46e-07	down-up	2.67	8.81	3.21	2	1.58	2.04	11.66	11.96	3.2	others
CsaV3_2G012430	17.81	24.97	27.02	4.05	4.07	8.45	46.67	25.95	35.92	1.17e-07	0.385163	2.37e-12	down-up	2.14	7.13	8.43	3.23	0.62	2.55	6.18	16.57	1.39	others
CsaV3_2G012540	44.66	43.95	34.39	4.35	6.48	7.91	68.53	64.77	52.45	6.42e-22	0.225187	8.41e-34	down-up	8.27	17.33	7.33	1.07	0.62	3.23	14.13	26.2	7.76	down
CsaV3_2G012840	34518.9	9796.75	10443.5	8707.85	3005.84	5369.34	16210	25060.9	16512.7	0.00127921	0.976179	1.1e-07	down-up	3730.87	3279.68	4135.61	6140.45	8089.12	4460.59	7701.7	3743.69	4856.55	up
CsaV3_2G013020	33.71	17.35	13.05	11.9	8.54	6.39	25.17	30.12	14.21	0.000366969	0.968734	5.94e-06	down-up	0.83	1.1	0.54	0.81	0.8	2.4	1.11	1.52	0.69	others
CsaV3_2G013300	170.59	148.14	196.45	84.37	56.33	106.8	195.18	191.64	209.99	0.00027622	0.846732	3.79e-06	down-up	28.78	82.5	59.19	25.19	16.79	35.19	82.72	122.26	21.5	others
CsaV3_2G013370	0.77	1.53	1.53	0.21	0.43	0.21	2.06	1.13	1.19	0.0191571	0.990322	0.0175113	down-up	2.29	1.42	3.42	0.77	0.42	1.44	0.75	2.29	1.56	others
CsaV3_2G013460	13.69	15.71	16.21	10.9	10.77	16.22	21.04	20.09	15.87	0.0265394	0.82438	0.00569645	down-up	3.67	3.07	1.01	4.49	6.22	2.42	3.25	5.56	3.29	others
CsaV3_2G013590	9.92	11.71	9.14	6.87	6.71	6.99	11.61	10.65	10.83	0.00571635	0.9691	0.00267967	down-up	2.03	4.21	2.03	0.95	0.46	1.97	1.7	3.26	2.33	others
CsaV3_2G013710	29.21	26.41	32.95	21.66	22.48	21	30.24	32.95	36.24	0.0070372	0.914436	0.00106794	down-up	20.54	34.95	25.16	20.16	12.12	33.96	37.54	43.32	22.31	others
CsaV3_2G013720	37.76	30.36	26.98	14.58	14.93	16.86	58.89	40.38	49.22	0.000164526	0.321207	1.48e-09	down-up	7.74	7.94	3.26	7.51	13.07	4.25	5	8.37	8.53	others
CsaV3_2G013770	92.62	77.63	37.69	26.25	20.28	14.85	53.92	50.42	84.7	7.97e-05	0.951028	2.85e-05	down-up	10.93	12.19	6.16	35.39	21.73	42.41	2.79	8.22	15.74	up
CsaV3_2G013820	194.41	115.76	129.17	112.1	83.83	110.16	156.67	211.98	153.22	0.0431708	0.89505	0.000925314	down-up	100.77	124.2	147.88	89.81	51.45	90.92	123.47	163.98	53.67	others
CsaV3_2G013880	39.34	43.19	51.25	15.5	19.44	12.32	39.05	30.1	34.17	6.68e-10	0.323783	3.95e-05	down-up	1.67	2.78	2.83	0.99	0.27	1.6	3.09	2.96	4.95	others
CsaV3_2G014170	18.78	46.32	46.24	9.31	23.87	19.88	37.48	20.74	33.03	0.0148497	0.85994	0.0286979	down-up	43.78	54.44	45.52	37.3	28.08	61.01	76.64	69.38	32.91	others
CsaV3_2G014350	25.89	23.79	21.05	12.96	16.44	16.14	26.31	29.71	27.93	0.000982268	0.821921	1.07e-05	down-up	2.41	4.48	2.37	6.28	3.79	3.06	3.61	6.09	2.94	others
CsaV3_2G014390	19.43	24.15	28.69	12.75	15.03	16.81	29.93	23.73	43.8	0.00858663	0.717539	0.000318728	down-up	16.28	20.17	10.3	3.05	9.3	7.35	16.84	28.42	11.17	others
CsaV3_2G014460	377.54	365.58	376.6	206.28	138.22	200.1	349.24	282.18	383.7	1.06e-05	0.907654	0.00116176	down-up	83.99	159.59	135.22	43.15	55.93	67.58	150.95	201.27	63.63	down
CsaV3_2G015110	1.9	2.16	1.37	0.15	0.59	0.19	1.61	1.7	1.4	3.3e-05	0.914436	0.000157774	down-up	0.73	0.68	0.48	0.27	0.11	0.3	0.49	0.45	0.3	others
CsaV3_2G015180	59.31	93.72	81.86	37.67	58	57.28	88.27	61.35	80.29	0.00778871	0.975131	0.00954772	down-up	44.32	58.08	44.91	13.49	12.56	29.56	65.18	56.77	23.84	down
CsaV3_2G015200	162.35	293.09	294.19	84.49	139.93	112.6	192.5	135.09	190.07	2.86e-05	0.358487	0.00493486	down-up	82.72	111.35	76.44	10.49	16.54	59.07	104.54	110.36	43.84	down
CsaV3_2G015280	2564.24	3359.61	3108.45	1146.07	1378.64	1762.24	2664.53	2249.33	3263.46	6.86e-07	0.844232	3.97e-05	down-up	418.33	721.54	908.76	507.38	210.76	431.82	978.87	1211.58	246.08	others
CsaV3_2G015630	90.22	63.22	88.42	50.86	29.15	48.37	68.01	98.29	55.7	0.00164918	0.942622	0.00941777	down-up	6.76	16.54	8.37	3.45	3.12	7.1	10.86	15.47	3.07	others
CsaV3_2G015990	35.65	20.86	19.04	20.37	12.29	14.82	32.52	39.65	25.58	0.0417702	0.827792	0.000206328	down-up	21.43	19.47	13.39	33.79	28.09	15.78	26.95	21.53	21.64	others
CsaV3_2G016130	85.56	77.89	84.43	68.61	64.55	65.53	85.87	70.08	101.77	0.0152486	0.993124	0.0349874	down-up	30.88	29.34	35.88	46.64	35.5	28.11	38.44	40.23	33.24	others
CsaV3_2G016240	55.16	44.22	36.59	21.06	25.37	24.07	66.98	54.04	42.81	4.31e-05	0.866889	2.67e-07	down-up	25.43	41.08	20.28	10.16	11.27	15.4	31.08	48.15	21.86	down
CsaV3_2G016420	82.17	52.21	60.09	42.46	31.29	47.34	93.21	101.43	108.7	0.0129182	0.245492	1.47e-08	down-up	12.18	20.3	15.78	9.37	5.63	16.09	13.48	15.37	6.99	others
CsaV3_2G016430	13.16	23.15	24.63	11.82	14.36	13.22	16.94	14.96	17.61	0.00417231	0.631655	0.0333581	down-up	3.3	4.97	4.09	1.63	1.98	3.89	7.04	8.65	4.1	others
CsaV3_2G016510	81.22	84.65	92.63	33.1	32.22	53.31	85.24	85.86	100.41	3.31e-06	0.998717	1.7e-06	down-up	10.28	24.21	17.63	8.18	8.88	20.79	25.91	31.53	9.33	others
CsaV3_2G016530	130.1	129.25	120.9	72.25	69.17	79.08	200.29	144.32	146.32	1.15e-06	0.612226	1.03e-07	down-up	56.07	96.61	84.92	25.45	29.23	43.32	111.04	134.02	59.45	down
CsaV3_2G016540	8.3	13.13	14.05	3.78	5.43	5.5	12.12	11.73	20.5	0.000359804	0.861031	1.85e-05	down-up	7.85	8.9	8.33	3.9	2.22	2.08	7.79	8.1	3.94	down
CsaV3_2G016550	448.52	314.85	346.41	194.06	133.26	175.25	543.11	510.43	440.85	4.68e-06	0.55148	4.25e-12	down-up	153.44	177.44	123.86	133.95	139.9	130.71	191.15	164.73	141.07	others
CsaV3_2G016630	221.38	116.12	99.69	83.64	48.03	64.1	119.54	163.1	92.17	0.000579236	0.8782	0.000681138	down-up	29.29	48.28	41.88	14.73	9.79	23.78	39.61	55.78	27.24	down
CsaV3_2G016730	177.51	128.04	144.99	110.94	84.34	95.99	179.44	190.05	274.8	0.00301032	0.454842	5.11e-07	down-up	90.87	135.09	127.08	48.92	38.79	78.57	146.95	178.96	87.26	down
CsaV3_2G016770	119.39	103.97	116.94	95.67	79.34	77.22	122.89	140.51	118.97	0.00675828	0.903332	0.00140938	down-up	90.17	118.25	111.61	130.22	104.41	105.97	84.42	112.5	65.95	others
CsaV3_2G017030	171.95	177.15	187.13	69.45	98.37	149.03	138.72	149.48	214.52	0.010336	0.919133	0.0324276	down-up	16.2	35.46	41	41.18	16.33	18.39	70.75	83.31	11.52	others
CsaV3_2G017140	1319.71	1122.33	1102.04	418.45	383.63	505.84	1980.17	1043.76	1162.12	7.99e-13	0.88459	8.8e-09	down-up	83.93	187.41	140.53	102.03	53.9	80.19	172.18	229.4	53.11	others
CsaV3_2G017240	3.57	4.33	5.34	2.34	2.68	3.13	6.58	5.47	5.73	0.00808969	0.593346	2.08e-05	down-up	1.58	1.82	1.82	1.53	1.79	1.32	1.21	1.28	1.03	others
CsaV3_2G017270	18.83	11.36	14.4	6.21	7.01	8.04	13.84	18.1	18.03	2.45e-05	0.957191	9.59e-08	down-up	3.19	2.89	2.48	2.13	2.52	2.63	3.53	2.86	2.58	others
CsaV3_2G017540	115.85	73.65	86.08	55.11	44.3	57.33	97.07	99.84	101.59	0.00137692	0.969821	3.68e-06	down-up	20.69	29.04	24.03	15.1	10.15	15.82	16.87	37.65	7.51	others
CsaV3_2G017550	64.47	33.55	30.6	24.96	22.41	25.44	45.58	60.59	33.93	0.0131919	0.979381	0.000373601	down-up	17.16	22.06	17.45	14.13	11.51	21.48	17.67	24.07	16.4	others
CsaV3_2G017600	333.18	243	293	139.32	104.31	172.76	445.13	383.2	442.87	6.09e-05	0.233392	2.53e-11	down-up	51.35	100.4	98.37	42.49	31.59	46.23	91.46	141.52	47.75	down
CsaV3_2G018020	7.79	4.78	4.22	1.44	1.23	1.54	12.17	13.99	8.52	6.65e-05	0.179027	1.47e-12	down-up	1	1.46	1.46	0	0.09	0.6	0.89	1.65	0	others
CsaV3_2G019530	665.89	746.33	719.57	574.31	526.66	433.35	603.02	677.32	1262.23	0.000787511	0.888907	0.0078499	down-up	414.03	553.05	807.62	156.69	180.35	76.93	372.2	584.96	763.31	down
CsaV3_2G019560	40.23	23.87	25.94	17.12	19.32	17.84	28.62	31.41	18.94	0.00721918	0.903567	0.0324143	down-up	11.5	11.11	9.83	12.64	10.18	9.87	10.76	15.27	12.97	others
CsaV3_2G019570	30.35	41.06	43.18	10.53	17.57	16.44	37.7	25.11	30.77	3.66e-07	0.717539	0.000152421	down-up	18.28	30.15	17.73	7.58	4.81	11.66	26.16	36.74	7.68	down
CsaV3_2G019690	297.94	323.4	271.7	244	241.2	289.95	432.11	362.5	324.23	0.037311	0.848474	0.00995817	down-up	138	205.36	211.37	63.47	76.77	121.1	196.99	240.99	110.69	down
CsaV3_2G019730	28.62	33.73	31.41	15.6	23.04	22.05	31.38	29.3	32.58	0.000693554	0.942926	0.00799426	down-up	10.53	10.67	8.19	2.68	2.11	4.9	12.45	12.12	5.9	down
CsaV3_2G020890	101.16	19	17.02	7	4.99	4.53	12.01	27.84	13.71	2.07e-06	0.601745	3.46e-06	down-up	0.13	0.26	0.46	0.61	0.37	1.66	0.08	0.12	0.11	others
CsaV3_2G021110	124.66	61.75	40.57	16.66	16.46	12.22	41.36	37.08	24.13	6.36e-12	0.0223033	0.000116313	down-up	1.68	1.24	1.66	0.43	1.04	0.24	0.59	0.76	0.7	others
CsaV3_2G024400	28.7	16.3	18.86	3.57	4.24	4.49	19.91	20.56	17.26	1.17e-11	0.917982	3.53e-14	down-up	1.13	1.14	1.09	3.09	19.07	3.46	2.73	1.27	3.4	up
CsaV3_2G024440	1035.44	763.04	894.81	516.52	344.49	578.92	1631.44	1183.28	1065.56	0.00059956	0.435299	2.21e-07	down-up	150.47	261.33	251.75	130.73	101.99	129.7	401.75	363.93	161.21	others
CsaV3_2G024530	312.26	305.43	253.11	39.03	134.4	42.74	337.75	201.81	155.63	0.000184236	0.762143	0.00277183	down-up	6.76	10.24	8.86	23.42	17.41	21.62	10.47	22.18	11.03	up
CsaV3_2G024740	151.66	225.02	270.21	40.69	38.87	63.68	294.12	180.18	239.84	1.67e-07	0.9691	4.6e-09	down-up	69.2	123.2	80.62	21.09	11.15	42.21	135.09	116.78	31.31	down
CsaV3_2G025100	152.32	111.23	110.91	93.86	67.89	78.77	220.61	181.36	139.94	0.00520177	0.484874	1.93e-06	down-up	31.09	67.95	46.91	26.41	21.75	36.08	44.49	78.18	32.78	others
CsaV3_2G025120	887.37	486.26	470.01	338.62	174.83	255.24	977.03	914.86	667.11	0.000399323	0.682571	2.19e-09	down-up	67.69	114.82	93.07	88.13	46.77	66.15	131.67	164.9	48.96	others
CsaV3_2G025140	43.22	58.76	61.08	34.03	40.35	42.62	59.49	40.9	67.52	0.0110234	0.997319	0.0230769	down-up	23.06	40.29	34.93	18.92	18.39	31.19	45.23	53.42	18.86	others
CsaV3_2G025180	15.19	11.91	8.22	3.02	4.44	3.09	7.73	8.14	9.56	6.31e-07	0.551493	2.02e-05	down-up	2.71	3.02	1.43	0.33	0	1.14	5	5.26	1.36	others
CsaV3_2G025410	406.29	405.86	413.17	201.48	180.6	206.86	378.61	342.88	336.7	1.17e-15	0.543186	6.38e-07	down-up	206.62	236.7	159.97	57.9	53.67	158.7	225.83	215.58	92.15	down
CsaV3_2G025420	357.43	299.15	310.53	231.77	199.31	245.88	326.02	307.62	362.33	0.00287718	0.999299	0.000966113	down-up	125.49	156.6	165.72	72.4	62.83	62.77	150.06	165.2	74.46	down
CsaV3_2G025570	470.41	249.62	278.68	106.56	69.2	106.66	335.02	403.02	326.96	8.32e-08	0.988621	2.52e-14	down-up	14.06	24.07	12.2	7.22	8.44	10.83	23.68	32.57	5.35	others
CsaV3_2G025710	92.52	54.75	84.13	37.15	33.06	42.32	89.2	118.71	50.89	0.00176418	0.960792	0.00257006	down-up	435.94	378.56	240.79	336.44	444.5	438.43	1003.64	931.64	416.99	others
CsaV3_2G025840	34.25	28.59	27.89	7.68	11.08	6.47	37.47	25.21	23.9	6.73e-13	0.954375	2.32e-10	down-up	6.92	10.19	5.67	2.48	3.5	3.64	5.74	8.2	4.66	down
CsaV3_2G025880	24	17.85	17.5	9.4	12.26	9.16	20.76	19.74	9.76	8.11e-05	0.878377	0.0233124	down-up	12.74	12.38	5.67	3.94	5.17	7.53	13.05	10.87	7.58	others
CsaV3_2G026360	19.69	34.16	19.29	2.95	2.54	5.11	9.14	10.04	11.68	2.58e-12	0.00298852	8.73e-05	down-up	2.16	6.96	2.09	8.29	6.58	14.39	0.44	2.78	5.02	up
CsaV3_2G026650	4.96	9.4	6.25	0.04	0.23	0.63	4.95	6.91	7.34	2.82e-13	0.958977	3.32e-16	down-up	4.87	2.09	2.78	0	0.07	0.2	0.4	0.99	19.81	down
CsaV3_2G027790	137.28	98.7	106.29	80.79	61.5	81.75	173.83	137.74	158.01	0.00721918	0.493562	8.96e-07	down-up	82.53	106.62	79.39	60.6	94.36	54.96	91.9	110.29	86.69	others
CsaV3_2G027820	50.76	76.01	81.12	35.68	48.67	54.84	69.93	53.19	78.44	0.0135866	0.976965	0.0120723	down-up	8.04	15.26	9.14	3.33	3.91	3.76	10.61	9.58	6.58	down
CsaV3_2G028090	31.35	34.08	46.02	15.97	13.55	22.49	37.74	32.41	54.98	0.00015334	0.944209	3.3e-05	down-up	4.38	15.17	13.89	6.18	4.02	9.08	24.55	23.83	6.34	others
CsaV3_2G028190	11.34	25.53	36.35	0.89	1.65	5.09	35.57	20.89	32.44	0.000394052	0.945217	8.98e-06	down-up	1.56	0.6	2.1	5.54	2.26	1.03	2.8	4.03	1.01	others
CsaV3_2G028630	35.37	44.45	20.78	18.99	15.27	16.73	50.44	37.89	41.7	0.00458853	0.815958	5.7e-07	down-up	7.56	19.59	12.87	24.73	14.27	31.32	3.7	11.37	36.44	up
CsaV3_2G028730	95.85	36.57	41.14	39.6	13.55	28.6	67.36	88.59	56.25	0.0369226	0.919062	0.000419128	down-up	23.86	27.08	22.08	25.62	15.53	16.14	27.74	28.6	13.85	others
CsaV3_2G029090	81.78	110.59	109.28	45.13	58.25	63.06	105.15	86.14	93.91	1.36e-05	0.928998	8.25e-05	down-up	334.65	177.37	134.04	127.57	178.33	297.7	219.49	129.52	193.37	others
CsaV3_2G029150	381.86	196.4	147.26	56.8	113.75	30.31	179.27	178.4	92.66	0.000223197	0.50701	0.0050955	down-up	3.47	3.13	2.8	1.93	5.11	2.88	1.67	1.92	1.59	others
CsaV3_2G029200	1305.31	398.09	406.37	289.65	109.31	196.74	605.34	859.37	627.08	0.000803895	0.985958	1.64e-07	down-up	175.07	232.93	185.55	96.03	148.58	83.54	251.35	251.56	179.73	others
CsaV3_2G029450	11.22	9.95	8.21	4.8	2.61	2.67	10	12.96	11.3	3.97e-05	0.909036	1.28e-06	down-up	2.54	2.43	3.47	2.95	2.29	3.67	3.72	2.67	4.53	others
CsaV3_2G029650	56.67	78.39	84.16	32.19	35.96	48.48	98.82	61.1	99.31	0.000227116	0.91459	2.78e-05	down-up	4.67	11.38	6.2	5.77	6.68	3.74	10.67	9.14	3.49	others
CsaV3_2G029970	51.46	59.57	73.01	41.9	44.75	51.91	57.09	57.41	81.68	0.0166681	0.976327	0.0122682	down-up	37.7	77.99	56.32	13.73	29.35	34.8	62.91	99.04	27.78	down
CsaV3_2G029980	58.87	48	42.85	36.48	31.22	40.88	44.2	60.73	60.16	0.0206886	0.955442	0.00572713	down-up	24.06	26.16	25.11	25.21	32.71	27.67	39.65	28.57	26.6	others
CsaV3_2G030040	32.07	35.83	38.38	21.42	20.58	14.84	34.91	26.26	35.52	0.000209243	0.899968	0.00561428	down-up	14.16	16.99	12.14	12.16	14.33	11	8.29	10.63	13.84	others
CsaV3_2G030090	70.81	72.41	100.27	64.75	47.35	55.67	87.74	88.73	93.18	0.0102	0.932736	0.000426113	down-up	71.58	53.43	49.64	29.1	40.31	43.52	59.77	44.31	46.02	others
CsaV3_2G030150	48.79	26.04	27.97	21.95	15.64	19.72	49.85	58.81	37.47	0.00288039	0.614693	8.54e-08	down-up	10.42	14.4	12.62	4.23	6.13	14.63	14.37	20.47	6.67	others
CsaV3_2G030460	19.41	11.63	10.82	8.85	6.45	6.9	10.23	16.09	8.76	0.00595854	0.8782	0.0385799	down-up	5.35	4.73	3.72	11.16	7.45	13.82	4.81	5.5	4.66	up
CsaV3_2G030530	77.75	44.04	57.48	37.44	30.08	47.18	74.82	93.38	81.1	0.0270103	0.611733	4.49e-06	down-up	21.96	62.75	31.22	17.64	11.5	32.46	47.82	78.96	12.16	others
CsaV3_2G030610	135.86	177.07	177.3	75.79	81.51	80.59	163.63	120.41	148.36	8.13e-08	0.840623	7.58e-06	down-up	64.03	113.81	72.35	5.6	8.79	15.8	100.35	110.62	38.72	down
CsaV3_2G030920	107.63	183.23	194.75	38.51	85.03	67.71	110.03	73.91	125.82	8.98e-05	0.270266	0.0252578	down-up	34.14	26.54	30.52	31.88	36.26	26.38	25.56	63.91	15.18	others
CsaV3_2G031240	22.33	22.2	27.93	12.06	9.55	13.46	20.82	18.05	24.77	4.14e-05	0.836755	0.00164098	down-up	15.4	14.79	14.21	15.47	16.42	10.24	22.84	14.28	25.98	others
CsaV3_2G031250	14.23	17.52	15.95	5.83	3.61	2.52	20.82	13.8	11.65	8.28e-09	0.976619	6.28e-07	down-up	0.61	1.1	0.61	2.28	1.02	1.5	1.56	0.55	0.1	others
CsaV3_2G031510	16.5	21.62	24.39	6.18	14.16	9.13	13.11	16.62	17.17	0.00116482	0.51998	0.0394013	down-up	85.03	42.01	31.73	37.1	42.44	68.89	37.42	26.41	52.58	others
CsaV3_2G031600	125.58	118.12	119.58	70.47	55.45	97.19	196.32	201.59	230.35	0.00184165	0.000848886	1.75e-09	down-up	27.3	54.56	38.13	25.07	22.68	43.91	60.39	70.12	18.8	others
CsaV3_2G031650	88.26	100.31	100.76	67.56	60.3	68.44	111.65	75.3	115.24	0.00127951	0.9906	0.00878517	down-up	92.71	114.97	105.47	23.02	25.68	43.51	53.97	103.12	38.82	down
CsaV3_2G031800	28.38	32.11	35.49	22.66	23.46	22.99	36.89	30.33	31.59	0.000853085	0.997319	0.00325765	down-up	9.57	15.31	10.26	4.66	6.15	14.33	15.09	16.87	10.37	others
CsaV3_2G031870	35.12	35.35	26.14	15.46	14.93	14.79	31.54	23.71	31.27	1.03e-05	0.880345	0.000243765	down-up	90.83	66.76	117.12	77.39	193.89	176.13	150.62	82.17	211.28	up
CsaV3_2G031960	60.02	123.79	86.1	22.21	44.57	41.39	335.92	173.4	227.43	0.000897508	0.00537674	7.33e-15	down-up	213.4	256.34	158.01	32.3	38.03	44.12	304.95	311.51	196.29	down
CsaV3_2G032160	1944.62	1113.61	1466.74	869.51	367.61	776.77	2475.01	1529.49	1629.28	0.00172392	0.8393	1.53e-05	down-up	317.38	623.9	512.21	205.85	169.67	151.34	437.05	760.92	215.54	down
CsaV3_2G032440	4.8	2.99	3.85	1.72	2.58	1.87	5.02	7.49	7.19	0.00632292	0.215676	2.04e-07	down-up	1.09	0.54	1.55	0.68	0.37	1.61	1.51	1.52	0.08	others
CsaV3_2G032660	21.39	16.33	12.13	9.22	8.64	11.7	23.24	24.57	15.48	0.0238421	0.848474	0.000791226	down-up	20.24	21.81	20.22	48.9	41.34	49.02	21.68	19.13	20.85	up
CsaV3_2G033130	137.24	108.85	102.97	52.45	57.23	58.16	113.45	71.93	75.17	2.47e-07	0.53824	0.00492129	down-up	31.67	46.84	32.48	20.51	26.5	25.49	45.11	52.31	23.88	others
CsaV3_2G033420	267.21	139.96	162.96	115.84	82.44	95.3	162.02	147.2	125.38	0.00178574	0.664568	0.00718509	down-up	39.56	78.66	61.89	35.48	47	42.4	75.51	119.81	39.78	others
CsaV3_2G033770	68.79	78.62	77.09	31.2	43.68	42.04	87.76	65.51	67.98	7.97e-09	0.991421	1.18e-06	down-up	7.74	12.15	8.26	3.49	5.35	4.24	10.13	11.52	5.17	down
CsaV3_2G033830	19.92	10.09	12.17	5.04	1.92	2.91	14.42	13.86	9.26	6.46e-06	0.924918	2.88e-06	down-up	2.73	2.47	1.63	0.5	0.81	1.3	3.01	4.2	0.36	others
CsaV3_2G033850	22.37	24.98	24.55	12	12.2	16.43	37.44	31.3	33.1	7.64e-05	0.189117	9.91e-09	down-up	8.31	19.93	9.6	2.33	3.95	5.09	16.4	12.76	27.03	down
CsaV3_2G033870	7.3	5.81	6.66	3.5	3.42	1.85	9.95	6.92	6.85	0.00286252	0.907082	0.000502145	down-up	18.71	21.55	17.61	12.44	7.44	18.19	21.56	20.29	17.52	others
CsaV3_2G034150	10.2	13.45	11.64	5.68	5.48	5.53	7.89	8.59	8.03	1.74e-07	0.201949	0.0122689	down-up	1.6	3.5	2.11	3.01	2.77	5.29	1.52	3.09	2.45	others
CsaV3_2G034230	29.38	31.11	39.23	18.59	18.26	25.68	26.04	25.46	32.22	0.00171079	0.618635	0.0400023	down-up	10.36	12.89	9.53	3.82	2.32	5.25	15.06	14.04	5.44	down
CsaV3_2G034770	11.98	18.44	15.74	3.15	4.53	2.74	11.82	12.89	9.33	3.69e-15	0.507682	4.7e-09	down-up	6.78	4.29	5.01	4.5	5.77	5.5	4.88	4.42	7.45	others
CsaV3_2G034780	21.97	15.81	18.74	9.62	5.97	5.5	19.75	19.21	14.5	2.74e-06	0.947077	5.02e-06	down-up	6.28	6.87	6.27	1.16	1.43	2.25	8.7	12.25	3.34	down
CsaV3_2G034960	110.21	79.33	50.17	22.62	27.41	22.02	36.37	40.7	27.42	9.55e-08	0.0163968	0.0160673	down-up	12.52	19.12	12.89	1.21	3.21	7.12	17.38	23.62	13.41	down
CsaV3_2G035000	14.34	23.75	23.29	11.77	15.62	14.67	22.89	19	22.77	0.00915616	0.99716	0.00175814	down-up	8.65	12.83	9.86	3.34	6.51	10.11	12.74	16.19	8.09	others
CsaV3_2G035200	48.42	55.19	70.25	9.05	9.81	21.25	61.05	46.45	72.03	3.62e-08	0.996313	4.57e-09	down-up	18.79	22	23.84	6.78	10.2	25.28	39.88	37.97	8.8	others
CsaV3_2G035250	114.67	122.71	113.18	67.65	62.35	87.29	128.57	98.54	126.13	0.000585529	0.9906	0.00193811	down-up	173.31	139.04	113.28	167.83	210.82	170.55	130.63	125.81	128.64	others
CsaV3_2G035740	6.69	5.28	5.95	3.25	2.03	3.99	5.76	4.76	6.78	0.0135383	0.968734	0.0260851	down-up	1.1	0.9	0.33	1.95	2.25	1.84	2.29	0.53	2.09	others
CsaV3_2G035830	145.85	193.92	169.68	93.85	106.14	115.86	234.06	166.39	212.81	0.000201109	0.840292	4.34e-06	down-up	113.04	172.74	110.84	39.91	29.67	109.42	218	230.88	85.99	others
CsaV3_2G035860	129.89	25.81	35.86	36.2	16.19	24.14	66.61	112.34	38.3	0.0309952	0.985958	0.000343596	down-up	18.33	33.72	22.01	9.06	9.46	12.06	28.24	37.21	20.53	down
CsaV3_2G036010	163.16	179.17	166.54	42.87	39.97	40.51	153.27	148.17	157.64	3.9e-40	0.763386	4.91e-28	down-up	15.76	28.54	32.99	6.52	7.99	6.24	30.93	38.9	30.77	down
CsaV3_2G036090	34.72	11.31	10.13	0.88	0.19	1.26	33.38	42.29	18.97	1.32e-11	0.677237	2.22e-27	down-up	0	0	0.31	0	0	0	0.06	0.11	0	others
CsaV3_2G036340	9.47	10.96	14.93	5.64	5.15	9.88	21.77	18.49	13.67	0.0245301	0.400012	5.95e-05	down-up	2.52	3.91	3.57	1.66	0.85	1.71	6.83	5.18	1.6	others
CsaV3_2G036430	712.72	348.16	414.49	197.3	133.17	179.68	611.88	568.66	492.13	2.63e-06	0.942492	2.46e-13	down-up	69.48	102.25	165.21	73.89	50.69	107.19	213.87	194.72	65.99	others
CsaV3_2G036450	73.18	39.1	35.41	24.86	23.94	21.45	55.41	65.9	57.25	0.00482826	0.897469	2.26e-06	down-up	12.78	20.35	16.58	12.05	17.65	13.62	21.57	27.19	11.78	others
CsaV3_3G000160	138.3	194.93	158.61	89.06	71.39	144.6	96	166.94	237.02	0.0194221	0.994632	0.0489153	down-up	0	0	0	0	0	0	0	0	0	others
CsaV3_3G000170	1.68	8.29	5.71	1.07	1.37	2.03	2.26	3.86	6.78	0.00710906	0.942492	0.00953466	down-up	1.81	3.02	2.28	1.31	0.63	1.85	4.1	7.48	9.61	others
CsaV3_3G000430	320.96	168.63	201.84	111.19	107.48	116.1	205.41	214.39	163.53	0.000506899	0.786807	0.000245846	down-up	54.97	56.89	59.95	52	70.89	59.24	67.97	65.55	53.59	others
CsaV3_3G000540	80.66	58.66	67.93	53.37	49.02	54.58	87.34	77.57	68.18	0.0335017	0.932291	0.00517934	down-up	42.36	48.69	38.61	31.3	49.26	30.09	52.78	44.69	46.59	others
CsaV3_3G000630	41.2	39.22	47.14	27.36	29.79	39.29	48.48	49.76	55.22	0.0364119	0.737482	0.00183864	down-up	10.41	18.8	11.88	8.26	7.1	9.35	23.72	32.1	7.87	others
CsaV3_3G000770	4552.72	2018.11	2526.32	1746.22	883.57	1311.36	2812.88	3657.11	2951.25	0.000664443	0.996801	1.69e-06	down-up	487.81	839.31	578.09	126.58	123.22	153.77	513.96	785.31	160.58	down
CsaV3_3G000840	193.26	100.98	161.03	75.59	37.47	67.02	155.5	183.57	129.6	0.000239967	0.9986	6.81e-06	down-up	48.6	81.02	62.74	22.3	27.89	41.09	73.13	71.93	26.59	down
CsaV3_3G000920	19.74	9.62	12.54	5.31	3.61	8.2	36.3	29.15	21.17	0.00439128	0.131586	5.56e-10	down-up	2.5	5.14	4.64	3.81	1.21	4.49	8.05	8.38	1.98	others
CsaV3_3G000950	21.75	40.41	24.55	5.51	7.32	5.64	20.74	16.99	15.06	3.02e-15	0.179088	4.48e-10	down-up	3.24	6.97	6.78	1.12	0.49	1.34	5.11	6.63	4.6	down
CsaV3_3G000980	70.11	54.29	56.17	25.36	21.51	29.31	48.51	65.36	43.6	8.66e-08	0.852668	2.56e-05	down-up	79	53.85	43.35	47.21	45.33	50.47	43.96	37.78	41.53	others
CsaV3_3G001220	21.73	23.33	28.06	15.7	17.01	20.27	24.16	22.22	25.04	0.016755	0.968734	0.0329058	down-up	10.35	15.79	16.66	7.62	7.35	14.42	20.02	25.28	6.51	others
CsaV3_3G001680	7.43	14.11	7.94	4.89	5.77	4.26	9.99	6.2	7.51	0.00159491	0.814636	0.0154935	down-up	3.33	4.45	2.88	4.13	2.82	8.2	1.85	4.11	5.03	others
CsaV3_3G001840	290.33	270.09	264.46	171.92	137.98	176.62	274.29	239.45	323.85	2.74e-05	0.990973	6.74e-05	down-up	112.52	179.6	169.26	107.34	61.74	121.58	216.39	241.38	104.07	others
CsaV3_3G001880	98.32	208.07	200.87	65.26	113.4	102.61	207.16	112.55	207.45	0.0108116	0.993124	0.00257006	down-up	91.84	137.43	92.31	32.06	36.82	103.01	227.36	181.54	58.19	others
CsaV3_3G002070	62.59	36.53	25.68	32.91	19.23	17.21	44.68	47.23	27.51	0.0424851	0.975131	0.0220319	down-up	27.24	28.6	24.47	20.23	15.6	19.03	12.31	10.98	25.1	others
CsaV3_3G002200	117.28	187.46	147.63	25.24	54.61	49.27	185.76	109.01	123.46	6.53e-08	0.943534	6.09e-07	down-up	234.64	242.41	208.68	288.3	132.66	198.72	388.55	361.43	157.89	others
CsaV3_3G002290	781.96	842.15	946.15	423.27	487.08	565.04	1281.38	874.22	1310.77	5.51e-06	0.473972	3.78e-08	down-up	182.45	285.23	294.93	191.08	149.28	183.13	249.25	330.3	122.59	others
CsaV3_3G002580	68.91	104.32	98.27	38.34	44.56	50.23	97.26	59.15	105.05	2.97e-06	0.968734	0.000151251	down-up	30.17	52.98	29.02	14.3	13.42	35.67	49.1	61.78	20.05	others
CsaV3_3G002980	24.83	15.64	19.5	14	8.41	15.71	23.35	26.71	19.42	0.040207	0.918425	0.00366855	down-up	12	10.34	7.13	5.86	4.72	9.12	7.66	7.83	6.94	others
CsaV3_3G003010	97.35	130.5	110.4	66.9	86.77	75.11	108.58	88.77	99.59	7.62e-05	0.758867	0.00716114	down-up	13.96	11.01	10.08	12.24	16.75	17.05	8.41	10.32	12.27	others
CsaV3_3G003320	98.53	98.88	111.6	70.03	50.03	77.35	159.55	109.23	135.38	0.0049258	0.608832	0.000109549	down-up	28.21	38.79	43.59	26.23	27.65	27.39	44.46	72.08	25.33	others
CsaV3_3G003360	16.69	25.31	31.3	9.24	15.87	18.25	29.01	18.35	23.52	0.0140563	0.950323	0.0187343	down-up	2.95	6.61	4.81	1.76	2.73	4.24	5.56	7.72	2.11	others
CsaV3_3G003380	4.34	4.42	3.21	2.41	1.7	2.23	7.79	4.87	3.7	0.0102703	0.791956	0.00106754	down-up	0.12	0.48	0.1	0	0.33	0.23	0.96	0.84	0.67	others
CsaV3_3G003430	654.09	432.59	574.76	326.22	250.39	310.41	375.08	563.28	597.63	0.000115417	0.924238	0.000609307	down-up	144.31	223.27	199.62	40.33	45.25	63.63	157.61	201.84	93.77	down
CsaV3_3G004020	78.27	99.86	90.34	64.8	74.64	81	79.11	96.33	133.08	0.0445665	0.907654	0.0388502	down-up	16.67	18.45	16.23	13.31	11.93	12.81	27.93	28.43	18.59	others
CsaV3_3G004330	4139.21	4048.82	5252.45	1974.73	2100.91	2342.31	3255.96	3182.4	4964.44	7.8e-09	0.76832	0.000138849	down-up	1440.96	2697.59	2739.08	702.36	470.8	599.07	2944.94	4081.13	810.14	down
CsaV3_3G004390	187.4	150.98	191.59	86.08	66.93	111.93	257.26	149.16	185.19	0.000368951	0.942926	0.000537374	down-up	64.35	99.71	66.77	29.77	21.39	33.48	77.12	126.72	29.2	down
CsaV3_3G004520	27.07	24.07	29.13	15.2	18.27	19.02	22.28	26.83	25.59	0.000617852	0.903567	0.0072259	down-up	7.62	11.12	9.77	2.85	3.78	5	5.97	11.41	8.54	down
CsaV3_3G004700	55.25	66.31	57.18	45.78	37.77	49.48	90.21	66.82	84.25	0.0211425	0.469639	0.000175821	down-up	33.36	29.59	32.66	38.48	24.07	28.34	41.05	45.04	39.37	others
CsaV3_3G004750	51.66	68.96	51.71	26.18	30.56	26.68	39.52	37.35	50.79	1.81e-07	0.368555	0.00274647	down-up	116.39	81.46	60.85	85.45	60.14	117.18	80.26	90.3	87.03	others
CsaV3_3G004920	31.11	23.78	21.3	18.33	15.64	19.21	34.34	37.3	25.38	0.0012313	0.852321	0.000897261	down-up	27.95	22.32	17.81	29	25.64	33.08	32.49	21.89	26.09	others
CsaV3_3G005080	177.04	215.02	220.89	116.3	144.56	186.27	224.43	194.37	295.55	0.0355034	0.862736	0.00726947	down-up	143.76	162.03	172.97	234.23	182.67	216.58	142.17	166.87	188.05	up
CsaV3_3G005260	19.08	39.44	40.16	10.28	17.88	18.04	28.46	16.24	35.26	0.00189553	0.845032	0.0241306	down-up	14.16	17.52	16.09	3.12	3.7	8.04	24.11	25.77	11.95	down
CsaV3_3G005340	16530.5	7792.25	9600.01	1940.08	888.5	1943.71	21810	17256.7	10925.9	6.84e-12	0.669816	5.47e-21	down-up	2300.93	3708.85	3438.92	437.34	306.99	778.1	5913.95	5180.55	1687.34	down
CsaV3_3G005440	48.43	36.72	42.67	25.71	20.16	34.6	63.36	63.69	58.47	0.00441022	0.261642	6.75e-06	down-up	10.41	17.25	17.18	11.07	8.74	6.38	18.99	22.91	7.74	others
CsaV3_3G005480	264.14	201.91	224.77	147.32	100.73	182.89	441.51	314.5	304.02	0.0112918	0.25479	5.74e-06	down-up	33.68	70.08	57.47	38.39	19.9	33.81	109.79	118.87	34.3	others
CsaV3_3G005920	23.02	21.07	23.85	3.44	6.55	6.09	83.69	43.33	41.73	4.51e-05	0.0459385	4e-11	down-up	48.28	105.9	80.91	26.67	26.36	38.59	164.34	209.82	83.99	down
CsaV3_3G005950	3610.61	1706.7	2162.36	445.23	262.13	222.49	2781.58	2394.29	1601.24	1.8e-15	0.942622	1.25e-19	down-up	295.65	581.35	344.18	64.68	28.14	168.59	463.68	797.15	63.83	down
CsaV3_3G005970	108.83	67.38	68.4	65.34	50.88	53.17	86.89	118.68	75.04	0.0363818	0.942492	0.00278127	down-up	34.48	41.97	25.28	19.88	25.63	22.18	40.87	45.06	35.66	others
CsaV3_3G006070	94.29	69.64	77.56	45.3	29.88	45.5	103.27	96.32	93.82	0.00013653	0.786807	7.98e-08	down-up	15.72	31.21	23.23	10.92	7.56	20.49	25.28	43.86	4.5	others
CsaV3_3G006180	94.73	64.64	67.48	47.93	41.25	45.7	71.3	84.69	69.81	0.00231933	0.986276	0.00109414	down-up	23.06	35.3	28.95	33.38	33.2	29.08	40.47	51.24	25.37	others
CsaV3_3G006360	59.41	36.27	39.81	13.08	14.37	13.12	51.64	47.78	53.05	5.22e-10	0.94549	1.05e-21	down-up	18.49	22.28	18.11	5.7	7.43	11.69	24.62	30.65	10.86	down
CsaV3_3G006400	2.72	3.6	3.93	2.09	1.53	1.6	4.8	3.32	3.71	0.0193701	0.942492	0.00676558	down-up	0.83	0	0.56	0	0.2	0	1.22	0.94	0	others
CsaV3_3G006460	55.3	43.02	43.61	29.34	28.43	29.43	69.36	55.42	49.69	0.000266223	0.80344	1.38e-06	down-up	19.27	23.69	14.88	5.44	6.02	13.81	26.28	25.56	10.81	down
CsaV3_3G006630	77.37	55.17	48.51	29.95	33.3	38.47	54.33	69.41	67.5	0.00107026	0.990261	1.32e-05	down-up	40.54	38.93	26.1	11.96	15.42	21.86	34.08	48.33	29.15	down
CsaV3_3G006740	81.05	38.65	42.92	38.03	22.5	27.2	67.87	80.32	53.14	0.0163228	0.884246	2.81e-05	down-up	29.23	35.84	41.68	9.5	9.93	12.43	23.55	37.35	35.46	down
CsaV3_3G006820	17.93	12.63	13.6	11.06	10.63	12.06	32.72	32.08	21.39	0.0460435	0.038601	5.86e-08	down-up	4.44	8.71	5.23	3.04	4.82	5.4	12.12	17.43	6.16	others
CsaV3_3G007050	253.19	117	116.58	64.93	47.85	57.12	161.88	173.83	126	3.53e-05	0.965398	6.79e-10	down-up	20.68	25.37	20.12	11.63	7.62	17.91	16.62	32.8	8.66	others
CsaV3_3G007200	12.28	11.8	15.04	8.11	8.02	10.69	14.82	17.64	14.18	0.0113023	0.828353	0.000984505	down-up	6.4	5.03	3.84	4.36	2.97	7.09	7.48	8.71	4.24	others
CsaV3_3G007560	32.28	117.97	131.63	15.75	20.06	39.37	95.76	63.37	128.71	0.00047112	0.998735	5.14e-07	down-up	38.52	62.11	34.14	2.15	7.01	3.06	98.27	110.76	9.89	down
CsaV3_3G007570	88.86	105.27	104.03	65.36	60.79	86.48	191.25	113.8	163.18	0.0127965	0.190539	1.65e-05	down-up	21.83	49.76	38.93	34.72	22.21	36.28	62.49	69.92	23.82	others
CsaV3_3G007830	460.83	182.9	201.15	163.74	75.66	119.78	325.86	452.29	266.42	1.04e-11	0.953848	8.15e-12	down-up	28.21	41.05	27.38	24.24	15.49	16.8	26.77	33.37	13.68	others
CsaV3_3G008010	35.88	55.95	49.98	22.05	28.38	24.04	40.34	43.27	42.06	3.53e-05	0.845032	1.01e-05	down-up	11.92	7.67	6.02	2.82	7.25	5.62	5.72	2.08	6.47	others
CsaV3_3G008050	218.02	96.85	92.39	7.2	10.4	5.81	107.15	105.27	40.25	3.78e-22	0.596276	7.42e-17	down-up	0	1.8	2.1	0.93	0.25	0.69	2.05	4.28	0	others
CsaV3_3G008120	101.89	77.79	64.74	43.92	43.52	49.81	166.27	112.84	125.85	0.000515399	0.197233	3.65e-12	down-up	71.35	111.41	55.12	24.64	53.25	59.12	93.87	133.64	79.11	others
CsaV3_3G008130	377.2	283.08	324.35	180.24	135.94	198.87	428.19	314.79	346.66	5.62e-05	0.942926	5.79e-06	down-up	29.45	66.3	44.13	25.48	18.33	35.49	89.81	97.38	24.07	others
CsaV3_3G008160	383.48	381.72	472.46	217.72	208.51	252.43	616.84	476.48	626.69	7.73e-07	0.292536	5.54e-12	down-up	111.14	174.1	139.97	57.58	37.42	84.82	148.93	226.49	40.48	down
CsaV3_3G008180	30.28	22.39	21.81	6.09	4.75	4.57	40.48	37.86	26.9	7.58e-14	0.585534	6.77e-20	down-up	6.25	12.14	5.67	0.66	1.17	1.73	8.22	21.47	1.7	down
CsaV3_3G008190	78.84	58.61	53.87	19.8	15.85	13.61	75.8	65.94	44.62	8.45e-13	0.976597	2.72e-11	down-up	30.15	56.94	40.31	0.34	2.41	7	49.58	65.12	34.41	down
CsaV3_3G008320	5.91	7.63	6.78	3.54	3.58	4.15	6.18	6.05	6.85	0.0071469	0.954347	0.0289399	down-up	1.65	5.12	3.96	1.39	2.59	3.67	5.78	3.32	1.01	others
CsaV3_3G008350	3067.2	2372.33	2899.54	1370.13	1377.04	1333.4	3120.26	2194.52	3389.06	4.78e-10	0.990034	1.28e-07	down-up	689.15	1191.12	955.22	289.27	226.93	398.85	707.24	1339.16	273.21	down
CsaV3_3G008860	146.54	90.59	75.82	14.47	15.47	20.61	106.46	114.01	118.57	1.77e-15	0.979381	6.06e-35	down-up	16.74	25.51	16.47	8.55	5.89	12.46	26.24	28.54	9.43	down
CsaV3_3G009070	23.68	51.41	35.82	5.52	12.46	7.24	45.51	14.71	20.56	8.66e-07	0.817404	0.00119843	down-up	4.74	12.34	8.34	3.64	3.04	6.9	17.63	29.91	3.49	others
CsaV3_3G009080	17.73	8.17	7.74	0.79	2.22	2.27	10.11	9.97	7.83	0.00924344	0.94549	0.0241554	down-up	0	0.38	0.22	1.34	0.24	0	0.25	0.69	0	others
CsaV3_3G009090	342.52	177.83	160.48	89.93	69.22	71.62	135.55	200.44	98.88	1.32e-06	0.429235	0.000638151	down-up	32.03	37.46	39.65	14.13	17.93	21.89	37.43	37.66	23.99	down
CsaV3_3G009790	1441.09	880.51	1030.29	381.99	263.71	420.13	1274.83	1431.36	1087.34	4.55e-12	0.911056	9.71e-16	down-up	145.68	254.38	205.08	64.78	56.26	100.86	260.86	271.63	79.91	down
CsaV3_3G009810	34.41	32.9	33.24	26.63	22.26	26.8	36.04	43.86	35.42	0.0114163	0.874853	0.00365405	down-up	10.9	15.31	12.02	3.08	1.87	4.77	14.06	22.2	12.24	down
CsaV3_3G010010	178.59	221.29	207.62	103.83	123.12	127.22	252.52	169.63	254.66	4.25e-05	0.942492	0.000103716	down-up	94.29	108.12	86.09	60.19	83.81	77.37	92.84	101.41	100.14	others
CsaV3_3G010450	2.31	2.19	3.01	1.03	1.42	1.31	3.68	3.9	2.89	0.0498579	0.785795	0.00356698	down-up	0	0.55	0.07	0	0.62	0.64	0.47	0.51	0	others
CsaV3_3G010590	6.3	8.21	8.06	3.24	4.4	3.23	6.98	7.81	8.54	0.000913937	0.993124	0.00123377	down-up	1.53	1.11	3.27	2.71	4.66	2.14	4.74	5.03	3.2	others
CsaV3_3G010660	6.4	13.43	11.5	4.04	5.8	5.36	11.79	6.49	9.69	0.00619775	0.942926	0.0197156	down-up	4.11	7.86	3.32	5.89	3.76	6.46	10.33	7.65	5.46	others
CsaV3_3G010700	77.77	64.38	58.1	27.9	27.19	33.28	42.91	51.64	47.6	2.37e-05	0.394654	0.00608266	down-up	13.48	21.23	23.65	20.74	19.34	41.36	25.64	45.82	9.58	others
CsaV3_3G010940	236.54	148.15	114.95	91.67	76.51	81.19	134.54	117.69	111.79	0.00105929	0.585602	0.00371792	down-up	180.24	131.97	119	142	156.94	154.23	121.7	92.51	137.44	others
CsaV3_3G011030	60.44	66.72	101.9	42.24	46.88	60.53	85.12	67.16	68.12	0.0205918	0.9691	0.0155379	down-up	25.89	40.75	24.79	27.12	31.21	32.84	31.6	58.89	24.46	others
CsaV3_3G011080	148.37	104.64	110.14	63.02	40.01	51.98	148.49	133.4	105.32	7.23e-06	0.976619	2.03e-07	down-up	38.51	64.19	45.78	7.36	4.47	21.31	49.46	68.06	31.4	down
CsaV3_3G011130	3.06	3.4	2.75	0.21	1.24	0.41	3.24	2.35	2.74	0.0137249	0.968734	0.0326588	down-up	0.41	1.58	1.48	2.2	1.59	2.92	0.54	1.63	1.08	others
CsaV3_3G011150	2.87	1.79	1.45	0.7	0.54	0.7	1	1.92	1.41	0.00038101	0.742707	0.0184466	down-up	1.17	0.36	0.9	0.65	0.55	0.66	0.03	0.15	0.39	others
CsaV3_3G011170	23.63	29.04	34.29	7.15	6.75	7.1	12.06	9.44	19.79	1.01e-14	0.023631	0.0080435	down-up	33.98	28.51	24.34	14.28	16.66	11.66	25.57	14.37	40.17	down
CsaV3_3G011280	27	31.34	48.58	21.12	10.19	19.71	52.07	75.64	69.87	0.00269477	0.0796826	1.72e-10	down-up	4.22	5.62	4.09	6.44	7.48	5.19	2.13	3.37	16.9	others
CsaV3_3G011330	2.11	2.33	1.76	0.56	0.73	0.97	1.76	1.13	1.27	7.93e-05	0.545948	0.0317661	down-up	1.37	0.61	0.28	1.75	1.59	2.65	0.28	0.2	0.41	up
CsaV3_3G011360	163.02	229.43	238.25	123.37	152.22	181.3	334.09	196.74	258.3	0.020576	0.771936	0.00136708	down-up	64.88	127.77	108.13	32.11	39.42	89.32	98.69	141.14	41.65	others
CsaV3_3G011480	124.04	95.25	97.59	72.07	66.09	69.33	104.55	113.76	70.2	0.00107223	0.919302	0.0301332	down-up	38.01	72.51	62.34	19.45	18.19	46.32	90.93	99.95	32.27	others
CsaV3_3G011500	0.72	0.4	0.67	0.19	0.06	0.19	0.78	1.15	0.73	0.00291174	0.75084	2.4e-05	down-up	0.02	0.08	0.02	0	0.06	0	0	0.1	0	others
CsaV3_3G011720	26.13	22.87	28	18.46	14.3	17.91	41.02	29.01	36.84	0.00724632	0.498124	2.69e-05	down-up	10.24	20.88	14.17	6.88	8.82	9.41	21.1	25.6	11.06	others
CsaV3_3G011780	102.99	76.4	94.16	17.38	26.91	22.06	153.48	89.09	131.91	1.43e-09	0.673218	3.43e-11	down-up	38.92	67.58	46.85	21.64	11.75	24.88	86.12	102.76	26.1	down
CsaV3_3G011820	1.52	2.12	1.79	0.86	0.76	0.17	1.6	2.19	1.42	0.0134864	0.983453	0.0226512	down-up	6.33	5.38	2.85	4.99	4.74	5.08	2.75	2.9	5.48	others
CsaV3_3G011830	2.58	1.68	1.44	0.52	0.82	0.46	2.03	3.4	1.85	0.00354476	0.903332	0.000333584	down-up	0.27	0.37	0.05	0	0.26	0	0.11	0.64	0	others
CsaV3_3G011910	3.39	4.02	3.47	1.13	1.63	1.08	2.69	5.88	3.27	4.91e-06	0.970706	0.000195631	down-up	0.17	0.06	0.11	0.23	0.53	0.28	0	0	0	others
CsaV3_3G011920	10.75	12.51	14.17	9.1	9.82	10.05	15.05	13.31	21.04	0.0204712	0.624108	0.000751598	down-up	6.12	5.46	3.78	2.81	3.94	3.49	5.69	6.17	3.32	others
CsaV3_3G011930	1.91	1.35	1.04	0.73	0.75	0.6	1.5	1.21	2.07	0.0212966	0.979381	0.00723244	down-up	0.37	0.33	0.36	0.66	0.68	1.11	0.36	0.31	0.87	others
CsaV3_3G012230	27.74	11.68	11.53	9.48	4.79	7.86	19.87	18.99	11.91	0.0120191	0.990583	0.0011901	down-up	3.33	2.88	2.43	1.55	2.78	8.56	7.79	9.08	4.32	others
CsaV3_3G012240	41.61	44.15	36.88	26.32	33.5	32.6	43.97	40.54	52.72	0.0150602	0.919636	0.00364894	down-up	13.13	20.04	19.02	9.15	8.34	14.35	22.87	31.3	15.69	others
CsaV3_3G012340	94.73	105.35	109.33	65.98	52.11	75.16	100.99	83.82	106.38	0.000923384	0.912013	0.00743476	down-up	81.14	69.28	81.27	93.3	91.26	97.92	89.73	74.43	78.76	others
CsaV3_3G012550	134.23	96.4	80.89	42.29	47.47	33.99	69.02	80.87	46.49	5.99e-07	0.312273	0.00791265	down-up	17.41	19.26	13.73	11.3	13.85	18.39	16.03	19.89	14.16	others
CsaV3_3G012650	23.93	18.54	17.53	8.16	8.33	7.86	26.66	22.94	16.86	2.65e-05	0.962895	1.93e-05	down-up	2.74	2.83	1.35	1.21	2.24	2.53	3.21	10.95	3.02	others
CsaV3_3G012710	819.18	460.55	510.5	470.72	250.69	381.49	638.6	777.46	614.65	0.0298271	0.942926	0.000823913	down-up	161.22	260.36	227.07	48.74	74.51	72.31	191.43	251.47	89.84	down
CsaV3_3G013420	7342.51	4181.93	5596.75	4005.92	2573.92	3186.95	6114.1	5122.9	4757.4	0.00327004	0.942926	0.00121262	down-up	1050.94	1617.23	1571.2	559.37	411.11	579.2	1762.9	2213.07	512.15	down
CsaV3_3G013570	706.06	800.74	707.37	200.26	250.71	272.75	511.72	530.85	749.61	2.59e-18	0.530543	2.35e-09	down-up	111.2	177.6	129.58	32.77	20.25	37.77	89.97	141.89	20.94	down
CsaV3_3G013840	1965.85	1218.57	1570.01	947.48	554.59	903.43	1442.24	2000.34	1713.09	0.00103622	0.970345	3.38e-05	down-up	334.73	501.1	447.03	131.29	98.56	148.51	394.8	503.6	154.7	down
CsaV3_3G014110	48.29	63.54	57.05	38.42	42.99	52.14	67.36	61.7	64.6	0.0468506	0.903332	0.0085044	down-up	23.11	27.43	19.58	12.6	11.97	8.46	33.18	41.85	9.79	down
CsaV3_3G014130	208.38	119.61	138.75	84.62	51.23	90.33	280.17	230.31	190	0.00155139	0.482514	1.14e-08	down-up	41.32	67.72	71.32	20.47	15.52	23.67	63.11	85.13	16.21	down
CsaV3_3G014440	13.75	1.84	0.57	0.22	0.67	0	9.48	25.3	0.91	0.00144224	0.894251	0.00305787	down-up	0.82	0.14	0.24	0	0	0	0	1.07	0	others
CsaV3_3G014800	15.43	13.22	7.57	3.69	4.65	1.54	31.15	33.21	15.29	0.000433283	0.164629	3.17e-10	down-up	1.2	0.51	0.24	0.71	0.26	0.35	0.65	0.73	2.76	others
CsaV3_3G014990	24.64	19.47	14.69	13.85	2.43	5.9	27.66	27.79	13.99	0.0300692	0.940018	0.00791265	down-up	23.73	49.72	34.05	26.41	25.14	32.34	61.56	92.89	10.51	others
CsaV3_3G015040	12.2	14.18	8.62	0.87	2.76	4.87	45.06	31.12	24.42	0.000532709	0.00143053	4.37e-13	down-up	0	0	0	0	0	0	0	0.9	0	others
CsaV3_3G015170	18.17	9.01	9.95	3.82	3.72	3.71	18.1	15.45	11.44	2.27e-06	0.914436	2.34e-12	down-up	2.3	6.03	2.74	1.36	1.03	3.51	5	8.74	2.79	others
CsaV3_3G015350	603.84	465.8	535.84	328.76	251.55	368.98	558.5	704.61	936.68	0.000745277	0.55751	1.62e-06	down-up	148.34	184.49	165.6	81.69	58.81	80.57	157.6	177.81	52.4	down
CsaV3_3G015360	487.5	227.2	272.09	118.28	60.13	106.68	368.01	452.41	369.33	5.51e-06	0.907654	1.3e-12	down-up	66.02	110.43	84.35	63.86	56.18	74.45	105.12	116.92	51.05	others
CsaV3_3G015500	37.9	45.48	46.84	25.47	26.57	24.4	84	54.89	66.38	3.03e-06	0.144433	3.08e-10	down-up	24.31	27.62	16.01	23.18	16.64	29.35	23.1	26.67	21.2	others
CsaV3_3G015560	27.07	57.35	60.68	11.94	20.7	19.82	35.91	54.69	47	5.36e-05	0.970345	2.36e-06	down-up	84.94	55.19	66.9	41.02	51.25	16.34	77.63	71.92	77.06	others
CsaV3_3G015780	95.85	85.72	63.02	38	48.4	35.94	74.81	87.78	65.68	0.000294336	0.945217	0.000967603	down-up	21.29	10.87	22.02	13.69	20.09	8.55	21.65	41.21	17.08	others
CsaV3_3G015790	1.78	2.44	2.35	0.55	1.51	0.23	2.58	2.51	1.53	0.0362811	0.998717	0.0381631	down-up	0.63	0.53	0.68	0	0.67	0.64	0.07	0.32	0.18	others
CsaV3_3G016050	55.8	95.66	57.61	10.77	23.9	35.41	141.14	50.49	49.92	0.0450258	0.966661	0.035674	down-up	19.76	10.64	6.54	23.34	19.01	16.44	9.66	3	14.25	others
CsaV3_3G016100	1.25	0.6	0.51	0.16	0.25	0.08	0.64	0.91	1.2	0.00209057	0.97027	0.000158227	down-up	0.22	0.17	0.05	0	0.21	0.48	0	0.13	0.14	others
CsaV3_3G016420	27.8	15.39	27.55	11.5	7.97	15.18	22.33	25.73	24.42	0.00445449	0.997319	0.000253913	down-up	1.15	3.32	1.37	1.58	2.7	4.89	4.3	1.62	1.74	others
CsaV3_3G016510	20.49	6.77	12.04	6.42	5.71	7.4	19.12	28.03	16.86	0.0158306	0.601745	2.83e-09	down-up	0.4	0.8	0.72	1.93	2.37	1.28	0.99	1.69	0.37	up
CsaV3_3G016740	139.63	206.89	206.36	43.75	53.76	82.75	156.95	105.53	212.33	1.19e-07	0.852668	2.12e-05	down-up	40.67	109.75	76.95	45.26	32.37	95.91	208.33	206.01	43.69	others
CsaV3_3G016780	25.43	49.42	42.48	14.76	19.08	17.69	31.66	23.28	27.14	4.26e-06	0.404981	0.000631758	down-up	20.04	36.7	30.02	3.19	4.9	18	39.21	45.97	12.91	down
CsaV3_3G016820	121.15	134.92	136.89	39.08	40.54	54.68	167.98	128.19	159.98	3.93e-13	0.828533	4.45e-14	down-up	60.04	87.79	64.51	16.3	17.7	42.47	77.16	100.88	33.44	down
CsaV3_3G016940	2.34	2.32	2.51	1.71	1.16	1.38	3.98	3.16	2.59	0.00703329	0.657384	0.000237429	down-up	1.82	0.76	0.71	0.62	1.39	1.29	0.59	0.86	1.07	others
CsaV3_3G017080	159.01	200.07	277.79	86.15	74.3	27.99	224.33	249.75	201.05	0.0158939	0.999171	0.0101326	down-up	93.62	204.27	128.98	12.02	11.32	5.38	164.16	154.7	50.51	down
CsaV3_3G017380	10.24	15.63	11.65	6.66	5.66	5.79	9.21	8.82	12.41	9.24e-06	0.702891	0.00192308	down-up	6.11	10.8	16.46	0.16	0.62	0.49	5.7	11.4	12.13	down
CsaV3_3G017550	423.4	247.11	210.15	166	108.22	141.62	250.65	285.02	170.06	0.000347141	0.773424	0.0026848	down-up	38.77	57.91	48.37	16.17	15.06	24.54	45	64.09	27.4	down
CsaV3_3G017980	107.87	126.23	127.4	55.84	64.28	71.18	113.7	86.27	132.4	8.03e-08	0.880146	0.000181305	down-up	28.51	54.47	41.01	23.75	17.14	40.78	64.6	65.63	23.01	others
CsaV3_3G018030	58.05	41.65	51.59	31.08	22.36	32.24	43.55	57.53	49.92	0.000923324	0.983791	0.000552467	down-up	22.12	35.74	20.92	6.42	9.44	9.3	24.61	21.96	10.94	down
CsaV3_3G018040	7.32	5.05	6.21	4.09	3.77	5.8	5.99	5.99	8.38	0.0231888	0.994747	0.0105942	down-up	1.04	0.8	1.03	2.05	1.22	3.28	1.13	2.1	0.22	others
CsaV3_3G018610	398.01	355.84	401.73	141.52	127.43	164.06	184.25	246.24	303.49	1.55e-13	0.0692775	0.000794117	down-up	66.3	133.69	149.2	96.16	86.81	89.55	160.11	225.27	91.17	others
CsaV3_3G019210	303.42	278.86	362.5	72.06	89.72	95.45	563.83	369.16	569.23	1.92e-16	0.19105	4.63e-22	down-up	76.71	117.28	102.18	68.56	29.23	57.77	165.28	142.55	48.53	others
CsaV3_3G019220	9222.15	10216.3	13440.1	3394.14	3131.33	4612.84	14123.1	9763.35	12495.8	5.09e-10	0.942926	7.49e-12	down-up	2806.17	5061.47	5060.51	1842.89	1274.67	1324.05	6710.72	6679.37	1867.05	down
CsaV3_3G019460	41.13	49.17	52.92	31.24	34.7	39.03	69.84	48.29	67.18	0.00954498	0.630671	0.000257103	down-up	24.22	34.28	34.3	15.69	13.32	28.78	34.15	47.68	26.96	others
CsaV3_3G019470	98.92	84.85	82.07	68.23	58.85	61.81	120.76	99.29	77.92	0.00318795	0.940884	0.00264418	down-up	29.69	49.86	40.92	10.74	14.36	23.22	50.94	54.51	23.31	down
CsaV3_3G019570	173.99	130.17	115.43	87.79	56.43	75.64	215.16	177.22	150.9	5.86e-10	0.790664	4.88e-08	down-up	48.1	101.3	70.88	13.26	14.84	24.18	78.12	103.73	38.25	down
CsaV3_3G019650	566.14	530.37	579.82	281.07	293.76	267.91	628.04	561.07	581.88	1.08e-12	0.970706	3.33e-11	down-up	242.99	412.57	363.9	64.26	52.79	118.27	441.86	494.26	175.91	down
CsaV3_3G019700	526.02	460.89	416.39	373.47	299.86	335.24	617.16	486.73	404.72	0.00503685	0.9691	0.00641874	down-up	100.29	164.97	168.19	83.66	51.21	115.92	145.5	172.39	56.5	others
CsaV3_3G019720	386.45	363.26	352.7	206.84	175.77	232.96	335.79	304.44	387	6.22e-06	0.868754	0.000114879	down-up	114.98	170.64	108.87	48.19	52.25	124.13	167.75	177.74	77.6	others
CsaV3_3G019790	10.94	36.77	37.39	11.41	13.88	15.03	22.74	27.84	53.47	0.0257083	0.936423	0.000254925	down-up	11.32	6.95	15.87	0.5	2.29	0.92	9.16	13.22	42.65	down
CsaV3_3G019800	49.69	87.66	97.66	41.85	42.37	55.28	71.87	69.34	98.7	0.00479036	0.999334	0.000287913	down-up	42.07	64.13	54.56	8.1	7.35	21.76	54.92	59.54	28.24	down
CsaV3_3G020110	2802.18	2586.62	3259.35	972.71	861.61	1222.82	2781.2	2841.59	3341.44	4.61e-12	0.993124	2.29e-13	down-up	743.38	1190.33	1200.5	231.85	190.18	194.11	903.69	1488.79	294.35	down
CsaV3_3G020240	18.72	19.59	30.2	10.61	8.9	14.09	36.56	27.6	31.25	0.00516271	0.649332	7.64e-06	down-up	4.29	8.15	5.25	3.38	3.06	0.84	12.28	10.55	2.89	others
CsaV3_3G020460	1.64	1.15	1.17	0.47	0.1	0.09	1.3	1.55	0.68	0.0122011	0.9691	0.0330118	down-up	0.48	0.37	0.94	1	1.94	1.39	0.63	0.51	0.52	others
CsaV3_3G021110	504.97	362.62	297.02	170.7	147.64	104.57	290.57	369.38	145.91	5.1e-07	0.631021	0.00557924	down-up	587.43	268.57	171.44	616.94	523.48	911.64	239.7	225.62	313.84	up
CsaV3_3G022160	38.59	30.15	25.84	19.29	20.15	17.13	32.58	28	25.36	0.00181004	0.907654	0.00514396	down-up	6.25	11.21	5.67	8.76	5.57	11.22	12.23	16.64	11.51	others
CsaV3_3G022600	21.5	26.03	25.73	11.49	18.07	14.03	21.11	24.02	20.38	0.000132237	0.828353	0.00512696	down-up	11.42	14.54	12.05	5	3.55	6.67	17.15	17.3	9.61	down
CsaV3_3G022640	86.19	78.16	60.8	38.33	29.75	32.8	98.02	88.42	95.29	1.12e-05	0.742707	2.97e-09	down-up	13.3	19.15	16.33	7.74	6.69	8.4	38.07	31.25	10.06	others
CsaV3_3G022840	192.17	147.94	164.41	101.48	65.21	98.36	237.2	224.06	172.49	0.00022354	0.732262	1.7e-06	down-up	61.21	102.94	85.18	24.31	23.07	45.23	120.94	121.37	48.95	down
CsaV3_3G023260	225.39	185.75	217.09	113.33	85.9	127.78	288.89	225.5	297.55	3.14e-05	0.572948	1.27e-08	down-up	24.3	31.33	40.02	25.63	14.77	20.42	29.36	37.23	24.91	others
CsaV3_3G023480	195.35	153.79	129.56	86.32	44.21	42.66	172.26	166.96	113.01	4.94e-12	0.702891	9.46e-07	down-up	18.5	7.93	11.25	40.22	39.64	38.48	8.93	15.04	21.46	up
CsaV3_3G025000	5038.33	2734.19	3549.2	2897.47	2187.71	2131.23	4327.31	3730.79	3925.94	0.0097017	0.977042	8.27e-05	down-up	1229.08	1661.26	1515.02	495.93	398.27	653.35	1603.87	2466.91	605.17	down
CsaV3_3G025110	23.28	24.71	26.45	19.18	18.3	22.43	24.07	26.93	29.01	0.0287522	0.956942	0.020196	down-up	30.94	24.27	19.01	24.35	18.59	34.53	24.63	22.13	22.11	others
CsaV3_3G026250	16.16	24.88	22.33	13.45	16.48	16.55	22.36	18.93	20.59	0.0049207	0.970261	0.0113927	down-up	8.01	9.37	7.08	6.38	3.72	7.37	7.7	10.72	7.65	others
CsaV3_3G026420	221.03	243.42	250.65	162.95	172.37	191.08	302.44	232.07	320.93	0.000867171	0.758828	0.000161125	down-up	101.18	135.41	123.16	50.41	58.5	74.62	140.98	172.64	70.57	down
CsaV3_3G026550	32.04	26.35	34.64	14.09	18.23	17.9	26.3	27.31	23.98	1.74e-05	0.687557	0.00152761	down-up	7.75	3.74	2.82	4.81	4.27	3.46	5.07	3.14	3.01	others
CsaV3_3G026650	49.55	48.55	57.43	44.13	37.09	43.74	71.62	53.81	83.37	0.0378298	0.5383	0.000819419	down-up	20.91	49.48	43.18	18.53	14.95	19.22	48.61	63.05	20.05	down
CsaV3_3G026660	604.28	671.01	648.62	476.99	452.05	610.36	672.31	758.36	972.02	0.0313709	0.628236	0.00221066	down-up	172.61	233.56	248.7	125.63	92.6	120.83	225.79	250.15	116.03	down
CsaV3_3G026670	4.86	3.3	2.88	1.41	2.15	0.98	4.96	3.28	6.78	0.00259052	0.819008	2.82e-05	down-up	0.36	0.14	0.04	0	0.26	0.36	0.22	0.41	0.24	others
CsaV3_3G026720	71.02	66.17	80.81	46.23	39.74	45.96	61.12	72.7	55.23	1.06e-05	0.738534	0.00436496	down-up	15.21	21.73	22.72	13.39	11.74	14.94	22.73	30.47	14.11	others
CsaV3_3G026830	472.77	349.07	406.65	166.86	139.91	225.64	481.96	439.11	412.65	3.22e-06	0.951028	8.13e-08	down-up	148.89	295.11	200.59	70.72	65.02	100.76	371.06	373.46	51.82	down
CsaV3_3G026870	18.83	15.78	19.47	12.71	7.25	13.33	18.57	20.83	17.02	0.0298496	0.990973	0.0212289	down-up	12.94	6.71	6.37	4.28	6.96	3.04	13.09	7.78	9.82	others
CsaV3_3G026980	100.14	112.95	106.8	90.25	71.24	80	175.16	100.9	128.81	0.012784	0.760303	0.0040432	down-up	60.47	91.67	84.41	41.22	35.31	60.58	89.67	109.72	54.82	others
CsaV3_3G027160	7.35	3.43	6.48	2.52	1.23	2.05	5.66	6.89	7.6	0.00188221	0.945947	2.61e-05	down-up	0.56	0.06	0	0.43	2	0.63	0.39	0.73	0.83	others
CsaV3_3G027220	27.35	30.8	32.94	16.93	21.97	22.23	26.55	26.09	28.15	0.000465745	0.732582	0.0158352	down-up	6.59	10.16	6.8	4.55	3.45	9.57	9.37	15.73	6.5	others
CsaV3_3G027250	128.41	74.86	74.33	62.52	42.28	57.77	93.53	111.09	86.6	1.22e-05	0.984333	6.56e-07	down-up	24.58	32.14	20.91	11.61	14.47	18.22	32.96	33.77	15.72	others
CsaV3_3G027410	18.41	27.27	26.62	12.77	17.2	16.74	27.3	20.4	27.68	0.00653905	0.9906	0.00395564	down-up	10.77	14.79	10.57	4.54	3.91	8.17	10.19	15.01	14.21	others
CsaV3_3G027600	137.93	161.27	157.42	58.48	55.38	84.69	237.54	134.43	174.63	2.71e-07	0.846732	3.24e-07	down-up	32.45	43.46	44.95	15.6	11.43	14.4	75.45	65.85	30.43	down
CsaV3_3G027650	107.96	69.54	73.6	42.37	24.21	44.13	79.72	62.62	71.99	0.0077148	0.914436	0.0480864	down-up	35.72	61.23	47.2	60.51	50.5	49.73	34.33	61.84	43.93	others
CsaV3_3G027740	1037.59	522.93	561.41	370.46	134.61	333.93	875.66	1119.73	720.7	0.00269477	0.841885	4.92e-06	down-up	48.69	79.14	70.55	13.39	56.15	16.27	108.22	248.18	72.64	others
CsaV3_3G027790	14.44	13.75	14.02	8.27	7.18	10.53	9.57	14.48	14.79	0.000399284	0.811225	0.0370598	down-up	4.01	2.87	2.66	4.4	3.39	3.4	3	4.06	3.34	others
CsaV3_3G027830	418.48	168.56	148.18	2.76	3.18	10.82	339.01	389.49	237.6	1.7e-20	0.868114	8.74e-38	down-up	0.24	0.44	0.15	1.44	0.08	0.21	1.03	1.33	0	others
CsaV3_3G028180	12.04	16.73	17.98	8.31	12.17	10	16.56	13.5	14.59	0.00515314	0.954268	0.0105196	down-up	6.8	7.22	4.28	1.88	2.62	4.46	6.02	7.89	6.28	others
CsaV3_3G028200	4.21	9.22	4.06	1.33	1.22	0.89	7.78	4.25	3.15	2.63e-07	0.947494	2.95e-06	down-up	2.15	2.82	0.94	1.27	1.66	11.77	0.09	0.74	1.87	others
CsaV3_3G028400	6.19	6.88	7.36	3.79	2.54	4.51	7.34	7	6.36	0.00122951	0.995935	0.00148623	down-up	1.18	1.61	1.05	0.28	0.49	1.18	1.03	2.6	1.16	others
CsaV3_3G028450	33.44	36.54	45.47	29.46	22.34	33.09	37	39.88	46.77	0.0333853	0.971477	0.0161144	down-up	8.02	12.95	12.67	5.33	4.5	11.31	10.6	19.89	8.16	others
CsaV3_3G028490	2.12	0.39	0.55	0.21	0.33	0	1.02	1.76	0.79	0.0461196	0.980269	0.00816028	down-up	2.9	2.12	2.54	0.84	1.69	1.43	4.56	4.24	3.07	others
CsaV3_3G028530	11.03	10.4	10.88	7.36	6.91	9.52	19.47	17.32	13.92	0.0244165	0.338486	7.57e-05	down-up	3.36	8.93	4.42	3.97	3.81	3.22	9.03	12.83	2.31	others
CsaV3_3G028560	44.64	38.42	52.37	33.99	25.42	39.64	57.23	62.22	59.24	0.00859035	0.456448	8.86e-06	down-up	10.74	14.44	13.81	5.72	3.7	8.54	13.67	15.96	4.42	others
CsaV3_3G028580	25.02	27.1	16.4	6.75	11.33	7.55	44.14	31.63	25.82	3.88e-06	0.487418	1.12e-10	down-up	2.11	7.21	3.01	2.55	1.48	3.56	5.73	8.65	1.37	others
CsaV3_3G028830	0.99	1.19	0.97	0	0.14	0	1.56	1.17	0.69	0.0119227	0.989836	0.0110757	down-up	5.32	3.44	4.2	0.74	1.51	0	7.45	12.34	3.52	down
CsaV3_3G028840	41.69	39.6	40.92	31.47	28	32.89	39.39	39.23	41.54	0.00833028	0.942926	0.0392291	down-up	8.72	12.3	12.58	22.71	11.22	14.16	12.02	21.41	9.41	others
CsaV3_3G030080	28.64	25.34	19.62	7.36	22.77	11.9	52.21	35.01	17.17	0.0496846	0.762993	0.00593394	down-up	8.88	11.25	5.29	9.72	11.92	24.35	24.13	22.84	15.81	up
CsaV3_3G030300	11.51	8.81	9.35	7.75	5.93	7.36	11.53	12.58	9.69	0.0220259	0.919546	0.00285736	down-up	2.27	5.11	3.65	2.91	2.37	2.93	3.48	4.98	2.63	others
CsaV3_3G030410	2.97	2.16	1.88	1.15	1.29	0.42	2.38	2.87	2.3	0.0196742	0.983771	0.00837856	down-up	0.73	0.65	0.4	0	0.05	0	1.27	0.97	0.15	down
CsaV3_3G030430	197.13	59.45	68.01	41	19.1	20.33	109.6	157.35	70.88	0.00012832	0.998717	5.5e-08	down-up	33.74	55.59	33.76	7.68	5.6	12.68	37.73	60.54	9	down
CsaV3_3G030440	1132.38	770.79	1007.13	269.77	181.85	301.96	1105.53	1347.12	1681.29	7.81e-12	0.472587	1.92e-20	down-up	500.02	770.52	621.7	142.42	111.2	185.52	705.66	719.02	215.48	down
CsaV3_3G030460	92.38	48.52	53.57	47.65	25.18	38.7	65.45	75.16	52.57	0.0247426	0.985319	0.0059305	down-up	13.03	19.24	15.68	7.7	7.23	9.05	11.93	22.1	7.37	down
CsaV3_3G030490	114.29	121.55	119.27	61.82	77.38	83.15	161.44	88.92	145.78	0.000113478	0.943929	0.00134787	down-up	80.53	103.38	85.87	75.3	74.57	100.59	98.88	114.46	85.18	others
CsaV3_3G030550	9.04	11.36	8.65	5.32	5.4	8.19	18.58	10.68	11.28	0.0371544	0.598114	0.00133269	down-up	1.24	0.95	1.54	0.37	2.12	2.27	2.29	1.69	3.67	others
CsaV3_3G031020	21.76	28.14	25.66	16.29	16.83	17.86	19.15	24.4	22.65	0.00124253	0.769966	0.0428857	down-up	49.89	29.42	27.3	48.81	51.05	45.88	44.06	27.21	31.66	others
CsaV3_3G031130	68.13	64.95	35.11	12.78	23.03	15.73	32.95	28.2	27.26	3.63e-07	0.0451823	0.00118398	down-up	6.63	7.61	5.41	2.78	3.49	7.1	8.81	15.85	5.58	others
CsaV3_3G031160	25.74	46.02	46.19	10.81	18.64	15.57	37.55	24.6	35.99	2.65e-06	0.773989	1.17e-05	down-up	7.11	7.56	6.25	2.93	2.66	9.73	8.46	11.1	1.99	others
CsaV3_3G031580	12950.6	15896.9	13403.9	585.91	1130.44	612.92	7948.26	7332.1	12704.7	1.2e-49	0.163329	9.32e-33	down-up	833.05	1029.18	862.52	128.88	69.74	69.74	837.4	1092.28	193.16	down
CsaV3_3G031650	18.31	13.19	13.23	8.19	9.3	7.16	15.01	17.48	12.04	0.00039172	0.985958	0.000455789	down-up	0.91	2.92	1.22	0	0.48	0.96	3.06	5.45	1.53	others
CsaV3_3G031930	200.96	130.51	168.55	82.53	50.35	92.07	199.02	261.64	190.69	0.000193933	0.713726	1.04e-07	down-up	35.71	80.71	73.12	21.85	23.07	34.39	69.29	102.02	17.22	down
CsaV3_3G031970	231.66	354.72	366.06	57.29	88.04	115.8	299.58	188.09	314.13	1.06e-08	0.803582	5.83e-07	down-up	55.07	114.66	89	20.73	19	55.26	122.77	135.1	30.19	down
CsaV3_3G032520	89.43	117.72	123.25	47.91	59.18	77.6	106.58	74.6	99.83	0.00077803	0.776265	0.017693	down-up	32.7	54.15	36.14	15.17	17.15	20.22	65.09	60.52	25.15	down
CsaV3_3G032620	967.24	766.5	782.78	418.5	282.47	406.12	1148.37	933.77	841.55	8.52e-07	0.873595	7.4e-09	down-up	366.08	549.1	438.76	189.88	177.74	305.7	633.46	611.98	303.96	down
CsaV3_3G032750	50.43	59.16	62.02	31.38	25.01	45.4	96.95	85.51	97.21	0.0131237	0.0712947	1.08e-06	down-up	5.68	21.88	18.45	14.43	12.02	18.02	12.41	37.37	1.48	others
CsaV3_3G032880	9.98	11.72	6.68	3.91	2.31	3.26	9	10.05	6.95	2.25e-06	0.942926	2.78e-06	down-up	2.86	5.78	5.05	2.99	2.39	8.7	1.35	4.86	6.76	others
CsaV3_3G033220	10.59	15.47	15.09	6.85	9.25	9.62	15.57	12.03	15.95	0.006014	0.975131	0.00196346	down-up	1.38	2.01	0.88	0.35	1.14	0.61	2.83	3.23	0.94	others
CsaV3_3G033720	42.33	33.87	38.14	27.21	22.25	26.38	38.38	37.76	37.54	0.000942862	0.976327	0.00142812	down-up	22.76	27.81	17.37	11.37	6.71	13.29	23.05	28.89	15.7	down
CsaV3_3G033820	41.67	74.54	60.52	29.16	46.47	41.16	67.02	50.39	57.05	0.0193153	0.984087	0.00941819	down-up	24.71	48.9	28.22	4.74	4.9	12.36	36.84	52.11	17.57	down
CsaV3_3G034100	1118.43	677.7	474.77	112.42	186.36	73.6	680.78	561.2	261.69	3.02e-10	0.623308	2.22e-07	down-up	54.63	61.18	40.02	25.21	24.88	32.51	54.99	61.84	35.8	down
CsaV3_3G034430	50.56	63.3	89.43	39.31	33.51	47.65	60.26	67.81	57.03	0.00406869	0.917678	0.00496666	down-up	87.51	69.48	53.75	26.45	34.8	21.11	75.14	90.79	80.7	down
CsaV3_3G034770	8.17	9.69	10.64	5.83	3.33	6.06	13.37	10.67	8.63	0.00627067	0.921225	0.00222503	down-up	1.16	4.87	2.33	0.77	1.6	1.24	3.54	4.67	1.79	others
CsaV3_3G034870	43.63	83.76	79.64	17.1	43.79	38.88	74.43	42.42	72.63	0.0106333	0.943929	0.0155927	down-up	12.81	16.42	17.38	8.75	13.51	28.35	32.91	40.71	16.64	others
CsaV3_3G034920	5002.36	3931.39	3757.58	2982.67	2520.54	3391.08	6378.84	4447.65	5016.33	0.00429424	0.759268	0.00257881	down-up	32439.3	26206.1	13042.1	37853.9	50003.8	38200.8	11453.3	14233.6	9025.48	up
CsaV3_3G034940	5.49	8.02	6.05	1.9	3.06	3.04	10.86	5.18	7.73	0.0183338	0.934778	0.00787853	down-up	1.79	2.52	0	0	0.29	1.18	0.88	5.3	0	others
CsaV3_3G034970	11.1	12.91	10.06	4.77	7.56	6.82	13.48	10.76	15.56	0.00265802	0.89505	0.000373686	down-up	5.67	9.88	6.46	3.86	2.84	4.93	8.44	9.62	5.25	others
CsaV3_3G035070	69.81	40.71	46.39	24.38	23.18	30.36	57.56	69.83	41.78	0.000457355	0.979312	3.3e-05	down-up	19.99	22.39	17.37	26.92	21.34	38.47	14.03	15.74	16.7	up
CsaV3_3G035090	55.79	76.65	87.68	41.31	57.89	47.74	120.35	73.03	114.66	0.0486411	0.671785	0.000853735	down-up	65.59	61.51	52.78	78.06	63.34	63.79	92.59	74.8	85.49	others
CsaV3_3G035440	95.17	72.76	75.89	27.04	27.35	25.55	64.78	57.52	94.34	2.94e-09	0.89505	7.62e-06	down-up	34.57	63.86	39.68	14.23	15.02	41.57	60.66	68.17	29.54	others
CsaV3_3G035520	15.58	75.54	46.36	10.32	28.09	16.99	118.87	28.51	82.57	0.0149118	0.691589	7.43e-06	down-up	0.08	0.19	0.22	0	0.24	0.6	0.08	0.15	0.43	others
CsaV3_3G035530	92.7	43.14	69.97	41.04	13.85	36.37	230.68	179.98	163.89	0.0108034	0.00119627	1.44e-12	down-up	48.65	87.94	65.93	14.1	12.29	16.53	110.57	127.46	50.78	down
CsaV3_3G035570	13.5	10.78	9.17	4.47	6.27	8.01	15.46	19.84	18.13	0.00662295	0.233778	1.21e-07	down-up	0.69	2.78	1.32	0.26	0.47	1.17	2.35	5.72	0.26	others
CsaV3_3G035670	7.13	9.62	6.3	3.84	1.62	5.11	18.86	8.05	9.22	0.0225223	0.614693	0.000577997	down-up	2.61	3.42	3.83	0.82	0.45	1.23	7.65	9.82	2.54	down
CsaV3_3G035990	48.28	50.49	61.92	36.53	39.21	46.1	48.03	53.85	56.59	0.0103628	0.970261	0.0193748	down-up	6.46	8.24	5.86	8.73	4.83	6.6	10.83	9.16	7.82	others
CsaV3_3G036270	9.97	7.9	14.36	11.28	12.91	15.02	11.45	9.49	15.03	0.0330287	0.970706	0.0142281	down-up	5.15	6.4	6.33	4.11	3.22	3.57	4.78	7.03	7.69	others
CsaV3_3G036280	17.6	8.92	11.89	6.76	5.48	9.4	15.52	15.18	17.41	0.0319077	0.862029	0.000179948	down-up	6.69	13.13	8.89	1.98	4.21	2.61	15.44	12.48	4.34	down
CsaV3_3G036610	232.84	200.55	234.65	146.9	94.46	146.56	278.12	222.86	282.53	0.000902025	0.82438	2.86e-05	down-up	88.14	165.69	127.62	20.4	25.8	67.16	151.05	219.11	56.14	down
CsaV3_3G036750	373.22	151.22	198.3	137.84	80.99	114.14	381.12	371.53	280.26	0.00393605	0.70379	9.56e-10	down-up	100.66	132.66	136.32	112.42	80.38	113.59	114.55	149.66	54.24	others
CsaV3_3G036980	422.32	123.06	116.75	72.68	33.31	45.26	139.64	232.05	85.16	9.27e-05	0.893285	6.26e-05	down-up	17.23	36.58	25.13	5.07	7.97	14.72	25.28	31.99	11.38	down
CsaV3_3G036990	38.62	29.91	32.51	25.73	21.78	27.01	43.76	38.17	36.83	0.0324389	0.862736	0.0021808	down-up	12.57	17.99	21.65	16.99	11.6	19.89	19.46	20.44	23.29	others
CsaV3_3G037140	60.71	55.21	63.44	46.39	29.45	40.08	58.91	73.13	71.81	0.00497678	0.884246	0.000692685	down-up	23.87	31.24	27.07	23.18	26.77	13.34	19.58	23.79	32.14	others
CsaV3_3G037240	85.48	61.71	73.76	19.22	16.46	26.84	101.6	128.41	120.2	3.54e-16	0.0601655	1.04e-29	down-up	5.73	14.07	7.32	6.49	3.14	5.99	12.77	17.08	2.85	others
CsaV3_3G037290	111.52	89.67	93.89	77.33	55.98	71.46	105.14	121.18	100.02	0.00925556	0.942926	0.00133354	down-up	24.37	44.55	35.08	17.86	20.06	30.89	36.66	45.09	24.62	others
CsaV3_3G037300	32.99	14.05	15.66	14.51	8.2	11.53	22.17	26.54	14.46	0.0452233	0.993124	0.0130378	down-up	12.66	18.82	11.23	6.79	9.11	9.99	13.74	14.52	11.61	others
CsaV3_3G037310	258	216.42	325.75	149.29	119.51	219.19	183.1	300.94	434.82	0.0122011	0.942926	0.00741906	down-up	72.62	95.82	109.32	31.33	43.81	39.23	70.48	92.02	50.27	down
CsaV3_3G037320	240.45	675.52	594.33	121.56	153.11	245.36	294.69	282.65	522.8	0.00023713	0.717187	0.00108248	down-up	105.41	89.8	83.4	89.52	71.24	81.37	137.43	189.74	73	others
CsaV3_3G037580	17.14	15.21	15.12	6.22	4.06	8.06	15.45	17.45	10.83	1.94e-05	0.941867	0.000394904	down-up	3.37	9.76	5.32	0.34	1.56	2.22	1.96	5.59	4.46	down
CsaV3_3G037760	1471.66	1135.74	1323.76	940.36	709.72	918.59	1937.78	1565.34	1716.19	0.00199465	0.486719	3.84e-07	down-up	938.5	1198.93	1108.48	575.03	428.15	700.61	983.52	1183.85	413.79	down
CsaV3_3G037790	77.36	64.65	78.73	48.28	33.71	46.47	89.9	80.22	54.12	0.000438293	0.997323	0.00274647	down-up	46.92	43.54	32.73	37.43	42.62	56.39	57.59	55.5	27.15	others
CsaV3_3G037920	2.6	5.45	1.02	0.33	0.22	0.33	4.51	1.8	1.91	0.000371991	0.976327	0.000229242	down-up	1.08	1.1	0.56	0.96	0.78	3.45	0	1.47	1.29	others
CsaV3_3G037940	47.4	30.05	39.9	33.03	22.98	27.68	44.78	43.2	36.79	0.0420175	0.982596	0.00598117	down-up	17.85	19.03	14.88	16.09	15.55	26.23	20.08	19.83	13.13	others
CsaV3_3G038290	173.6	169.82	149.56	43.17	45.41	35.34	111.61	108.29	89.33	1.31e-26	0.0276332	1.33e-10	down-up	108.44	67.73	52.11	138.97	112.03	148.82	50.72	51.63	53.56	up
CsaV3_3G038300	64.12	74.64	66.27	32.52	49.76	42.31	76.1	76.48	81.49	7.93e-05	0.801256	1.71e-06	down-up	26.95	29.27	18.79	13.84	17.85	30.96	25.95	27.63	25.28	others
CsaV3_3G038470	73.4	36.55	47.84	26.79	19.09	31.61	64.82	71.22	55.73	0.0032022	0.883741	1.01e-06	down-up	8.43	19.3	16.2	5.33	6.03	10.71	16.75	24.76	10.84	others
CsaV3_3G038500	6.28	14.28	13.56	2.95	3.11	1.85	6.94	8.9	17.4	9.94e-06	0.984087	3.4e-05	down-up	1.27	0.35	0.51	0.41	1.11	0.3	0.11	0.21	0.6	others
CsaV3_3G039300	33.8	51.47	47.52	16.95	22.65	24.24	30.31	30.38	35.81	5.51e-06	0.287412	0.00426027	down-up	5.64	9.52	7.34	3.86	4.44	5.51	12.1	13.18	4.33	others
CsaV3_3G039400	56.79	30.84	26.73	1.28	0.73	2.17	103.42	77.47	44.91	1.94e-19	0.267661	8.78e-33	down-up	0.89	0.59	1.94	0	0.25	1.01	0.5	2.44	0	others
CsaV3_3G039440	1.72	1.57	1.61	0.56	0.35	0.69	0.83	1.54	1.09	3.45e-05	0.634765	0.0213442	down-up	0.09	0.79	0.36	0	0.02	0.15	0.77	0.71	0.35	others
CsaV3_3G039560	79.14	57.1	43.95	48.04	38.43	38.47	85.07	72.08	58.24	0.0473311	0.893005	0.00104949	down-up	25.34	35.38	24.65	12.57	17.31	17.01	30.7	44.67	22.17	others
CsaV3_3G039710	302.74	351.71	410.02	187.91	191.39	294.49	212.39	374.2	534.72	0.004768	0.990973	0.0261168	down-up	53.46	88.59	83.62	30.85	25.58	39.94	54.03	51.94	34.22	down
CsaV3_3G039850	55.63	35.51	30.55	28.96	21.85	29.12	60.26	68.27	46.17	0.0049207	0.808038	0.000552127	down-up	7.1	10.29	7.62	9.49	6.73	10.11	8.66	14.31	9.51	others
CsaV3_3G040230	513.78	318.97	505.48	203.38	123.36	207.21	346.32	535.94	363.1	2.1e-05	0.944209	2.7e-05	down-up	43.07	78.16	71.68	11.13	14.12	29.2	68.16	83.68	34.81	down
CsaV3_3G040460	15.27	7.79	7.9	5.99	4.34	6.45	9.23	14.26	8.21	0.0200688	0.997752	0.00576084	down-up	3.36	3.65	4.12	3.26	2.97	3.65	3.34	3.99	2.81	others
CsaV3_3G040590	102.78	100.51	113.31	67.71	62.27	92.27	115.96	102.34	87.36	0.0105875	0.954686	0.0364549	down-up	31.67	41.6	35.25	44.93	48.79	29.78	61.16	52.43	19.36	others
CsaV3_3G040690	6.19	11.98	8.08	4.14	6.87	3.95	7.9	7.57	8.38	0.0198866	0.973092	0.0122993	down-up	1.05	1.21	0.87	0.93	0.94	1.49	1.32	2.39	1.17	others
CsaV3_3G040770	15.83	7.87	9.31	5.48	5.37	3.26	10.98	12.61	8.43	0.0045886	0.979305	0.00204993	down-up	2.43	1.29	1.7	5.81	1.42	2.79	1.86	7.41	2.75	others
CsaV3_3G040780	7.76	5.08	3.12	0	0.24	0.23	2.1	1.86	0.73	6.54e-13	0.0181629	0.000126521	down-up	0	0.07	0.04	0	0.04	0.12	0.13	0	0	others
CsaV3_3G040800	128.04	190.3	176.38	38.19	81.05	46.01	280.32	164.56	205.21	2.65e-05	0.763583	1.3e-07	down-up	106.41	99.52	94.44	38.17	50.33	52.53	126.43	129.69	116.21	down
CsaV3_3G040860	51.37	78.74	73.96	34.63	44.89	48.58	67.69	62.92	60.28	0.00159468	0.930789	0.00285371	down-up	22.83	30.28	20.88	11.25	12.05	24.1	31.23	41.12	13.39	others
CsaV3_3G040990	241.65	205.15	224.63	137.47	85.44	120.09	246.96	265.59	245.3	3.92e-05	0.878058	1.29e-06	down-up	42.15	56.92	51.43	51.62	31.16	50.22	83.54	94.47	49.1	others
CsaV3_3G041040	38.8	47.79	42.63	29.41	35.24	32.03	54.26	42.78	48.16	0.00310319	0.892292	0.00108248	down-up	16.6	35.49	21.01	14.78	18.6	24.17	29.03	34.51	15.31	others
CsaV3_3G041150	485.73	473.84	501.92	286.5	263.7	321.41	612.98	454.17	349.89	2.52e-06	0.97027	0.00350358	down-up	120.67	166.52	182.54	79.67	78.05	120.18	144.82	184	151.59	others
CsaV3_3G041250	42.98	73.37	71.65	30.12	47.91	48.28	97.97	48.89	93.12	0.0355256	0.82438	0.00284005	down-up	16.81	24.44	23.82	11.99	11.39	16.77	25.03	36.36	14.97	others
CsaV3_3G041460	82.89	37.64	47.95	26.31	16.6	9.4	48.14	70.05	47.6	0.000177386	0.982276	6.35e-06	down-up	238.42	119.81	69.91	61.31	93.13	79.08	109.79	79.64	75.51	others
CsaV3_3G041590	26.56	38.24	35.23	13.83	18.67	18.73	45.87	27.8	36.68	1.67e-05	0.950552	2.11e-05	down-up	4.15	11.52	8.51	3.68	0.96	5.89	8.94	16.7	5.59	others
CsaV3_3G042370	232.33	205.94	219.01	142.43	143.29	147.38	292.7	243.74	207.3	1.03e-05	0.943685	7.51e-05	down-up	31.62	63.21	51.27	19.07	17.98	41.89	79.79	98.52	19.45	others
CsaV3_3G042440	11133.1	5129.25	6196.68	3289.08	1372.61	2150.97	10209.1	8823.52	6337.31	3.48e-05	0.958475	1.49e-08	down-up	2603.32	3472.33	3157.36	687.83	670.66	1166.16	2710.98	3505	831.81	down
CsaV3_3G042460	131.42	102.25	87.24	53.82	51.61	54.75	83.75	96.8	68.16	8.05e-06	0.621883	0.00168309	down-up	38.91	51.52	34.93	14.33	17.29	26.9	50.97	48.43	27.91	down
CsaV3_3G042780	1.74	2.45	0.95	0.35	0.36	0.07	1.88	1.9	0.44	0.00113602	0.946695	0.0122689	down-up	0.45	0.89	0.17	0.91	0.25	1.7	0.06	0.23	1.25	others
CsaV3_3G042830	51.25	56.35	62.08	40.57	42.04	42.61	65.96	64.67	62.89	0.000217297	0.856173	7.8e-05	down-up	17.25	19.73	14.99	6.1	8.58	13.39	20.39	27.9	20.01	others
CsaV3_3G042900	144.98	137.01	121.54	89.56	108.38	107.02	173.09	124.83	137.87	0.00762798	0.966661	0.00569185	down-up	37.9	53.02	29.42	98.17	87.04	123.43	65.06	69.98	31.66	up
CsaV3_3G043120	8.33	8.15	9.83	5.89	6.47	6.77	10.22	8.63	11.58	0.0171348	0.888931	0.00349676	down-up	4.35	5.79	3.98	2.54	3.38	3.2	5.51	7.73	5.71	others
CsaV3_3G043290	113.72	108.08	122.16	61.41	51.46	64.88	148.32	124.82	139.63	1.14e-07	0.707825	2.56e-10	down-up	21.9	41.38	33.07	12.69	12.74	29.08	45.12	57.09	13.38	others
CsaV3_3G043450	92.38	114.12	128.97	46.11	62.02	69.37	75.87	75.57	106.21	1.6e-05	0.417523	0.0119237	down-up	38.77	34.4	27.35	28.53	57.41	31.94	22.73	20.97	31.48	others
CsaV3_3G043460	11.48	11.38	11.53	5.18	7.88	9.63	11.32	11.8	13.99	0.0289517	0.968734	0.0151122	down-up	1.59	2.92	1.59	0.68	0.73	0.84	4.11	10.01	0.83	others
CsaV3_3G043470	28.79	5.93	7.92	5.8	6.12	3.89	20.04	29.38	19.93	0.0270852	0.766961	4.89e-10	down-up	0.33	0.17	0.69	0	4.02	1.45	0.22	1.6	0.14	others
CsaV3_3G043740	18.82	24.9	19.26	8.01	11.87	9.04	15.12	15.52	24.16	1.88e-07	0.828027	0.000237837	down-up	41.69	26.97	43.54	0.65	0.88	1.93	9.89	23.75	62.25	down
CsaV3_3G043770	105.08	95.78	88.73	51.64	52.04	49.96	115.42	111.84	101.12	3.34e-10	0.913113	7.27e-09	down-up	15.64	31.23	22.16	10.54	9.33	20.55	20.13	36.45	6.3	others
CsaV3_3G043800	29.27	26.82	23.63	17.55	13.95	15.29	30.37	29.85	31.38	0.000239162	0.855389	3.36e-06	down-up	8.91	14.97	11.06	5.8	8.75	10.94	8.45	15.39	11.58	others
CsaV3_3G043830	29.41	36.81	38.4	19.86	20.29	27.35	32	45.43	41.6	0.000695361	0.961092	0.000511437	down-up	15.97	17.23	12.07	11.37	8.07	10.35	17.86	24.57	12.65	others
CsaV3_3G043960	58.26	85.38	95.02	41.5	44.09	60.85	68.86	68.52	91.45	0.0034502	0.954686	0.00365118	down-up	11.26	33.05	18.58	4.37	6.21	7.96	30.8	50.15	8.1	down
CsaV3_3G044400	40.82	48.51	46.57	22.28	30.95	35.71	63.85	48.34	65.08	0.00410622	0.507682	3.77e-05	down-up	14.03	31.23	16.89	2.92	6.06	13.62	24.79	36.59	7.44	down
CsaV3_3G044460	17.16	14.26	11.7	8.46	8.76	7.62	15.03	12.02	11.75	0.00264006	0.905176	0.0133126	down-up	2.39	3.66	6.34	2.88	3.78	4.29	3.26	2.57	1.78	others
CsaV3_3G044890	74.75	77.7	80.42	41.96	45.01	54.69	113.69	82.45	91.01	0.000207662	0.735916	2.01e-05	down-up	39.94	59.94	42.83	25.14	30.64	28.31	81.13	91.37	49.06	others
CsaV3_3G045220	3.12	12.78	15.2	0	0	0	28.37	10.49	10.29	0.00151101	0.869516	5.86e-05	down-up	7.39	8.17	3.18	0	0	0.36	3.75	2.74	1.07	down
CsaV3_3G045350	89.33	87.41	99.88	48.16	46.58	56.14	106.06	104.18	144.36	5.83e-07	0.587595	5.75e-09	down-up	39.95	66.37	61.6	68.37	41.34	60.87	51.36	85.2	48.2	others
CsaV3_3G045420	8.22	2.78	1.57	1.44	1	0.53	5.4	4.92	2.97	0.00577909	0.997319	3.83e-05	down-up	2.37	1.82	0.85	0	0	0.09	1	1.05	0.18	down
CsaV3_3G045640	16.06	16.62	18.5	6.88	9.79	8.06	20.6	20.74	20.41	1.26e-07	0.711701	6.22e-10	down-up	1.81	3.85	1.77	2.63	0.24	0.6	2.26	7.2	0.91	others
CsaV3_3G045740	23.87	6.43	10.72	8.62	5.4	6.28	18.04	23.3	12.51	0.0459797	0.897163	3.1e-05	down-up	3.63	9.58	6.14	4.65	8.16	13.25	8.16	11.14	2.1	others
CsaV3_3G045800	47.71	60.43	51.41	34.11	29.61	31.54	53.34	49.16	47.67	1.24e-05	0.917982	0.00034426	down-up	4.52	3.93	3.42	2.44	3.17	4.15	8.1	9.97	5.97	others
CsaV3_3G046150	13416.2	9772.43	12290.7	4101.98	2887.15	4369.05	18744.1	11854.4	14492.9	1.3e-11	0.723226	2.52e-14	down-up	1908.73	3577.59	2824.55	957.62	651.07	902.08	3841.25	5378.68	917.7	down
CsaV3_3G046470	223.01	209.61	200.57	135.22	89.44	130.7	203.85	163.6	216.37	0.000289979	0.911944	0.00556044	down-up	45.54	78.16	74.42	23	20.26	21.68	93.66	87.31	50.56	down
CsaV3_3G046530	33.54	57.67	39.55	10.13	14.63	12.51	96.38	48	74.33	1.85e-06	0.415829	3.26e-11	down-up	15.87	25.24	10.69	4.02	2.97	4.36	17.95	39.19	19	down
CsaV3_3G046590	18.22	20.41	20.62	13.58	15.23	14.38	21.09	21.05	21.3	0.000638882	0.956454	0.000773018	down-up	9.93	11.05	7.77	7.2	7.56	10.39	11	13.48	6.54	others
CsaV3_3G046630	71.23	94.57	91.07	76.84	63.73	59.72	143.43	102.59	119	0.0211619	0.306994	2.6e-05	down-up	108.92	81.07	66.33	28.01	32.33	39.62	91.77	61.45	81.66	down
CsaV3_3G046680	69.75	61.1	57.44	42.24	42.19	43.2	71.42	57.67	63.13	0.000982545	0.995935	0.00103895	down-up	34.31	34.5	27.55	26.97	25.93	31	22.47	22.66	31.84	others
CsaV3_3G046730	2.67	3.35	2.87	1.61	1.78	1.73	4.47	2.96	3.5	0.00777591	0.881206	0.00198992	down-up	0.19	1.08	0.39	0	0	0	0.76	1.28	0	down
CsaV3_3G046800	31.91	34	46.3	15.22	14.93	24.39	49.19	48.97	43.88	0.000187538	0.655749	1.37e-07	down-up	6.31	7.86	3.39	8.2	8.5	10.12	9.55	10.64	6.78	others
CsaV3_3G046930	13.31	11.13	6.21	2.58	2.68	1	28.61	23.65	17.49	7.81e-07	0.0439178	4.25e-21	down-up	4.4	6.61	5.21	1.66	1.27	2.69	4.47	7.31	5.57	down
CsaV3_3G047120	18.62	12.25	16.3	10.24	6.88	10.29	18.2	18.11	14.79	0.00921029	0.971477	0.00150261	down-up	2.25	7.58	5.3	1.46	2.82	4.56	5.73	7.17	2.83	others
CsaV3_3G047200	36.91	19.58	15.08	8.15	6.42	6.94	17.06	25.92	10.27	6.7e-06	0.803442	0.000235139	down-up	0.33	0.64	0.46	0	0.95	0.74	0.64	1.57	0.49	others
CsaV3_3G047640	43.9	65.76	60.1	35.48	37.78	42.92	72.4	51.61	57.52	0.00427799	0.969821	0.00206819	down-up	19.49	30.61	27.45	14.2	10.07	26.87	38.63	50.04	20.27	others
CsaV3_3G047650	536.53	247.12	299.14	254.07	146.39	150.24	475.26	495.16	246.97	0.00831007	0.967102	0.000516111	down-up	115.16	152.41	110.06	47.86	37.11	111.28	152.55	164.98	42.4	others
CsaV3_3G047730	54.64	33.79	30.06	17.33	14.32	14.29	36.13	44.02	25.51	1.83e-06	0.903567	3.55e-06	down-up	11.04	11.56	9	4.69	6.42	7.1	7.02	11.95	8.56	others
CsaV3_3G048230	99.23	59.78	46.41	30.32	43.83	20.76	56.74	55.61	36.83	0.00294955	0.661107	0.0263681	down-up	16	48.42	40.82	5.14	5.85	7.54	5.03	13.45	22	down
CsaV3_3G048610	12.57	11.04	11.25	6.93	7.45	9.55	15.36	15.34	16.03	0.0253708	0.552769	0.000183102	down-up	1.72	4.57	1.54	1.99	1.65	1.28	4.75	5.98	1.65	others
CsaV3_3G048620	48.71	53.03	31.38	2.66	5.49	3.53	59.5	25.1	18.74	1.58e-22	0.847735	2.37e-11	down-up	0	0.92	0.81	0	0.58	0.13	2.06	3.19	0	others
CsaV3_3G048670	94.61	92.29	86.85	46.43	65.48	64.03	95.43	80.24	81.58	0.000628177	0.907654	0.00551533	down-up	32.56	49.35	42.41	11.13	11.77	27.31	63.63	84.13	22.86	down
CsaV3_3G048840	82.38	46.55	49.67	45.22	26.27	39.85	53.9	70.12	43.55	0.035671	0.954375	0.0358673	down-up	13.62	22.23	9.7	6.13	8.38	8.5	18.06	23.02	11.58	others
CsaV3_3G048850	182.87	111.75	128.2	103.51	58.46	100.06	157.08	184.12	178.69	0.0261168	0.827579	0.00017714	down-up	34.31	48.52	42.65	17.18	18.76	25.34	43.05	65.59	26.45	down
CsaV3_3G048950	42.82	35.83	41.6	28.91	35.44	31.77	51.29	50.84	47.07	0.0201109	0.702291	8.76e-05	down-up	4.45	3.98	3.52	4.26	5.71	4.23	5.71	6.98	6.35	others
CsaV3_3G048980	45.52	49	44.52	23.51	25.38	19.39	45.43	30.77	32.44	2.35e-08	0.567316	0.00430518	down-up	35.25	25.68	28.87	25.76	41.09	51.22	27.82	28.73	22.95	others
CsaV3_3G049320	93.19	172.77	146.53	45.91	71.49	68.62	279.16	135.08	192.09	0.000586966	0.632559	7.72e-07	down-up	17.07	40.06	23.49	22.29	21.61	22.86	47.02	100.52	21.87	others
CsaV3_3G049340	3.35	3.94	4.64	1.47	2.71	1.53	6.69	4.74	5.5	0.00638643	0.614693	5.21e-05	down-up	0.12	0.14	0	0	0	0.08	0.12	0.28	0.48	others
CsaV3_3G049390	2495.39	1335.19	1593.81	1447.83	648.12	1162.24	2856.69	2438.26	1942.67	0.0371544	0.708026	0.000181829	down-up	719.13	1177.19	984.02	452.67	261.05	417.97	985.48	1287.72	368.63	down
CsaV3_3G049870	40.95	77.07	67.93	18.05	31.6	37.09	91.99	49.25	76.39	1.15e-05	0.836898	1.97e-07	down-up	12.1	33.19	20.46	4.65	7.76	18.79	37.97	43.93	17.68	others
CsaV3_3G050060	60.91	60.35	65.29	35.09	41.42	37.38	53.86	50.7	52	2.2e-06	0.554798	0.00421408	down-up	46.13	47.36	32.44	20.2	22.68	29.1	50.67	48.38	31.82	others
CsaV3_3G050100	248.38	249.37	263.25	91.44	90.05	104.49	311.09	296.33	386.85	2.87e-18	0.390989	3.88e-21	down-up	97.34	129.03	86.04	73.24	49.79	88.36	116.09	123.51	40.59	others
CsaV3_4G000060	629.64	841.91	795.82	519.37	558.08	550.2	927.58	710.01	996.58	0.00030332	0.842511	4.51e-05	down-up	162.16	272.89	276.34	99.05	78.37	129.7	280.36	515.22	154.53	down
CsaV3_4G000560	60.61	58.75	64.16	44.96	46.88	42.8	57.91	50.56	58.5	0.00152457	0.839836	0.042376	down-up	112.45	66.64	58.61	33.28	52.43	47.78	76.25	58.75	54.55	others
CsaV3_4G000630	13.15	14.19	13.01	8.48	10.89	10.25	16.69	14.54	14.81	0.026504	0.903332	0.00780757	down-up	3	6.47	2.54	0.58	0.39	1.18	8.1	11.97	1.48	down
CsaV3_4G000660	75.67	68.11	71.37	46.7	48.51	58.41	97.63	82.98	105.05	0.00379877	0.40838	4.18e-06	down-up	30.17	46.83	30.38	8.87	12	22.41	47.93	54.63	21.53	down
CsaV3_4G000850	136.87	133.08	123.68	52.73	72.57	63.61	110.37	73.27	92.65	7.04e-08	0.160767	0.0259189	down-up	81.46	111.19	101.85	18.57	19.27	59.06	107.73	136.9	64.17	down
CsaV3_4G000980	115.05	212.64	190.7	101.04	154.01	119.54	206.73	127.85	171.95	0.0420175	0.979982	0.03447	down-up	56.29	94.92	62.64	18.35	25.2	56.53	81.63	83.51	49.7	others
CsaV3_4G001210	9867.91	8765.55	9180.71	6158.57	4464.11	6883.13	13961.6	9121.33	10663.9	0.000872016	0.781995	0.000225433	down-up	1417.37	2042	2156.53	694.79	498.91	619.6	3192.2	3174.75	1424.72	down
CsaV3_4G001260	57.15	150.86	110.08	37.5	67.51	53.9	98.14	54.07	97.75	0.00643817	0.816895	0.0247692	down-up	17.23	38.03	23.51	5.55	9.15	8.28	41.82	45.71	16.28	down
CsaV3_4G001290	1.73	2.59	4.84	0.78	0.63	0.31	2.31	1.09	3.21	0.00513902	0.873595	0.0473609	down-up	0.23	1.51	0.52	0	0	0.46	0.91	3.37	0.45	others
CsaV3_4G001490	126.5	135.92	125.46	61.86	60.61	72.67	149.6	107.43	163.55	1.64e-07	0.962895	5.01e-06	down-up	37.32	64.68	54.6	18.09	10.84	36.76	44.6	72.86	36.8	down
CsaV3_4G001530	162.66	218.95	205.76	123.38	161.01	163.39	162.41	162.45	218.57	0.000331756	0.935949	0.0330716	down-up	48.32	52.02	49.58	24	33.47	30.31	66.51	58.37	40.4	down
CsaV3_4G001630	20.42	11.73	37.03	8.76	6.35	10.21	20.94	20.02	16.92	0.00103486	0.88986	2.24e-05	down-up	3.71	15.79	9.31	2.7	2.11	8.68	18.75	36.68	4.56	others
CsaV3_4G001680	25.42	1.18	44.11	1.06	2.5	2.58	15.87	38.32	38.33	0.0110643	0.969821	5.85e-18	down-up	0.19	0.29	0.43	0.34	0	0	0	0.09	0	others
CsaV3_4G002010	8.35	6.97	8.41	4.11	3.68	4.47	12.02	13.07	14.05	0.0211076	0.363285	2.34e-05	down-up	3.85	10.62	6.39	2.68	2.78	9.63	8.33	11.12	2.32	others
CsaV3_4G002150	21.46	25.14	26.11	13.21	16.45	18.41	33.03	25.17	23.72	0.00147782	0.912322	0.00100996	down-up	5.82	10.43	11.36	4.98	7.07	6.27	12.38	13.47	26.78	others
CsaV3_4G002470	19.14	19.05	22.74	5.51	5.47	8.84	19.14	19.45	21.53	5.87e-06	0.980046	1.71e-05	down-up	2.35	4.27	4.2	1.3	2.26	1.36	6.17	8.01	1.9	others
CsaV3_4G002690	182.32	84.67	101.68	87.06	45.14	83.46	125.08	203.71	148.98	0.0439626	0.842511	0.000254716	down-up	50.06	59.4	54.64	26.21	26.5	33.12	45.72	61.92	38.84	down
CsaV3_4G002940	29.93	21.93	21.76	19.33	17.95	14.8	33.84	34.66	20.57	0.0309056	0.880146	0.00610953	down-up	16.47	29.49	15.23	11.41	7.83	17.89	25	24.71	15.86	others
CsaV3_4G003110	191.21	112.16	106.65	61.06	49.64	57.65	86.56	137.49	78.99	2.91e-06	0.59827	0.000633585	down-up	35.81	41.43	29.11	16.22	14.99	24.43	36.89	45.22	22.92	down
CsaV3_4G003140	102.01	72.6	80.46	48.88	36.11	44.79	121.09	99.73	88.18	5.05e-05	0.836654	7.81e-08	down-up	27.15	47.09	33.49	10.2	10.09	19.42	45.31	67.92	20.75	down
CsaV3_4G003300	28.18	28.21	26.2	15.28	14.76	13.35	46.87	31.88	26.48	0.000572438	0.801256	4.26e-06	down-up	13.29	16.04	10	2.98	7.13	11.23	9.3	10.72	11.58	others
CsaV3_4G003420	13.73	19.04	17.43	6.19	8.39	7.48	18.66	10.96	17.52	0.0139653	0.970706	0.0476163	down-up	5.39	8.25	8.87	3.82	3.53	1.71	27.01	13.34	11.76	others
CsaV3_4G003440	11.92	11.41	14.05	7.76	7.01	10.44	13.7	11.94	13.12	0.0119696	0.993124	0.00756144	down-up	1.87	3.14	2.68	2.69	2.38	1.63	3.73	5.11	2.52	others
CsaV3_4G003470	37.52	24.44	34.81	14.63	12.65	21.2	43.82	51.09	39.06	0.000722785	0.566282	5.44e-08	down-up	3.55	8.46	6.7	2.81	4.35	4.61	11.6	18.1	2.73	others
CsaV3_4G003510	0.78	0.56	0.4	0.12	0.12	0.18	0.7	0.41	0.73	0.00627067	0.99831	0.00557639	down-up	0.03	0	0.16	0	0.14	0	0.15	0.14	0.12	others
CsaV3_4G004360	222.5	111.36	119.24	71.1	33.3	42.12	278.5	270.9	165.9	4.75e-05	0.489355	2.31e-11	down-up	125.77	110.31	75.13	100.57	81.24	55.67	134.49	190.69	56.47	others
CsaV3_4G004470	1401.1	1206.09	614.28	171.01	244.53	140.27	416.17	307.5	224.49	1.25e-12	0.000159586	0.0132237	down-up	31.35	35.53	25.64	29.72	34.84	20.88	33.28	36.7	33.77	others
CsaV3_4G004820	3.01	1.62	1.99	0.52	0.05	0.26	1.49	1.65	2.35	4.42e-05	0.880345	0.000179343	down-up	0	0	0	0	0	0	0	0	0	others
CsaV3_4G004870	83.18	106.44	93.87	41.25	57.4	50.29	87.51	73.18	72.24	1.29e-06	0.583252	0.00149391	down-up	0.9	5.7	0.8	0.68	1.36	0.76	1.38	1.05	0.58	others
CsaV3_4G005070	54.79	58.72	64.59	43.66	37.25	48.43	75.81	57.38	47.89	0.00501679	0.998717	0.0314648	down-up	9.11	15.17	13.87	10.47	19.7	12.62	36.5	31.13	13.62	others
CsaV3_4G005570	57.34	59.86	62.76	43.83	40.37	45.54	121.46	95.82	101.78	0.0118368	0.111679	3.36e-07	down-up	30.19	47.4	47.98	20.06	12.91	37.5	50.86	64.21	16.15	others
CsaV3_4G005750	79.18	70.4	44.18	42.96	43.08	41.32	72.92	75.24	49.23	0.0149984	0.998454	0.00510535	down-up	20.46	22.33	13.23	18.67	17.09	18.07	26.75	38.02	20.58	others
CsaV3_4G005770	1057.87	333.56	284.59	168.77	99.5	98.13	324.5	368.21	218.32	2.26e-05	0.428046	1.18e-05	down-up	31.43	55.4	40.48	18.32	14.32	34.98	33.78	56.52	19.06	others
CsaV3_4G005780	9.23	9.16	7.94	3.36	5.24	6.71	8.02	9.2	8.91	0.0127754	0.981287	0.0155476	down-up	3.93	3.58	3.56	0.61	0.56	1.83	9.04	8.25	7.2	down
CsaV3_4G006010	25.79	29.59	26.02	14.48	20.19	18.08	29.55	24.46	28.99	0.000402039	0.995935	0.000862528	down-up	7.78	9.58	6.25	3.49	3.89	8.47	7.9	11.88	5.57	others
CsaV3_4G006070	16.73	14.68	21.58	11.33	8.69	9.22	28.36	20.94	21.37	0.000875943	0.657671	1.39e-06	down-up	6.53	8.21	10.02	4	2.48	2.02	5.91	11.29	5.23	down
CsaV3_4G006100	141.38	133.66	144.21	121.71	91.05	120.86	165.73	142.93	170.41	0.0434743	0.85323	0.00784468	down-up	108.82	165.87	154.02	59.69	60.66	72.47	106.19	147.74	79.34	down
CsaV3_4G006510	17.88	20.95	14.54	12.23	5.95	9.88	26.68	18.09	23.44	0.00841886	0.772217	0.000203538	down-up	4.7	4.79	4.95	4.62	1.81	3.04	4.29	6.08	2.58	others
CsaV3_4G006540	189.26	89.01	126.97	101.21	49.49	76.31	196.09	372.42	208.88	0.0241533	0.232654	3.09e-07	down-up	13.71	26.66	25.54	39	33.81	34.29	19.17	68.47	9.89	up
CsaV3_4G006730	363.49	397.77	385.17	231.23	283	283.19	502.54	301.87	437.99	0.00312932	0.989754	0.00964312	down-up	136.19	257.28	261.46	69.69	65.62	83.11	200.56	326.23	124.74	down
CsaV3_4G006750	36.31	50.29	47.62	21.14	18.23	31.85	44.65	52.2	61.98	0.0032585	0.859182	0.00019398	down-up	38.31	24.2	26.83	61.39	44.85	41.99	39.2	31.37	34	up
CsaV3_4G006770	29.18	27.72	31.72	22.96	18.35	20.05	32.76	39.74	35.91	0.00172049	0.710505	4.93e-05	down-up	29.85	26.14	30.82	15.07	16.05	8.89	45.11	35.83	23.66	down
CsaV3_4G006820	121.91	83.08	75.5	30.58	33.95	32.6	89.89	92.18	64.05	2.22e-09	0.878058	1.48e-09	down-up	11.85	25.51	17.47	4.1	6.59	15.72	35.68	35.82	12.33	others
CsaV3_4G006920	108.57	62.38	76.21	39.23	32.25	36.4	73.29	76.08	64.2	1.37e-05	0.844232	7.24e-07	down-up	14.1	16.06	11.53	15.49	16.25	19.35	14.16	16.6	10.08	others
CsaV3_4G006980	9.72	16.61	23.86	3.97	8.37	6.68	22.53	11.23	20.47	0.000655688	0.978625	4.2e-05	down-up	10.23	18.16	12.13	3.44	5.97	5.12	18.74	26.8	9.67	down
CsaV3_4G006990	25.27	41.52	39.34	19.02	21.48	17.09	58.77	41.07	44.65	0.00374057	0.557724	2.89e-06	down-up	34.27	60.17	36.17	2.42	5.96	20.13	73.67	83.18	25.61	down
CsaV3_4G007180	145.9	141.35	142.79	68.3	44.5	86.34	133.79	127.96	157.88	6.47e-05	0.94549	7.59e-05	down-up	45.82	95.25	70.22	13.26	13.44	17.16	127.54	127.15	49.86	down
CsaV3_4G007220	349.34	226.14	241.78	226.08	160.84	176.1	472.63	517.75	268.1	0.00397239	0.33799	8.91e-06	down-up	75.74	155.19	132.79	50.05	38.24	70.77	151.7	239.73	41.55	down
CsaV3_4G007300	68.98	81.1	86.77	56.22	66	71.2	91.67	76.72	90.37	0.0273938	0.936277	0.0100582	down-up	40.07	57.24	43.44	26.32	23.03	37.78	55.16	58.63	30.21	others
CsaV3_4G007520	5600.52	3228.55	3940.28	2337.03	1542.68	1799.56	5442.88	4396.42	3576.08	4.25e-05	0.9906	5.84e-07	down-up	1300.66	1611.94	1519.22	504.55	415.65	620.85	1559.1	2014.5	520.12	down
CsaV3_4G007560	110.29	104.09	121.55	48.01	48.43	67.68	130.71	127.45	151.11	2.14e-06	0.661401	3.2e-09	down-up	17.33	29.09	18.34	8.61	16.03	22.13	45.86	49.42	15.11	others
CsaV3_4G007600	9582.71	6703.18	7731.22	5728.52	3860.72	4488.23	10525.9	8258.37	9262.38	0.000269071	0.839623	3.01e-06	down-up	3049.9	4122.86	4278.61	1035.1	928.52	964.88	3612.08	5238.44	1504.76	down
CsaV3_4G007800	486.87	340.57	411.52	297.23	220.49	287.46	360.7	463.07	636.42	0.00440242	0.892377	0.000493884	down-up	54.37	72.64	72.98	101.85	95.85	87.64	114.6	114.2	64.49	up
CsaV3_4G008010	113.57	120.69	104.8	82.69	91.56	93.47	134.75	126.77	118.96	0.00684067	0.886025	0.00153081	down-up	75.91	85.79	70.2	65.28	61.59	87.27	84.66	90.23	72.13	others
CsaV3_4G008090	8.85	12.36	8.33	3.88	5.72	3.84	14.9	9.81	9.43	0.00430317	0.942926	0.00155854	down-up	0.51	0.69	0.35	0	0.37	0.17	1.76	2.22	0.5	others
CsaV3_4G008310	7.44	12.24	12.84	4.35	7.31	6.55	11.9	7.7	9.34	0.0110286	0.917982	0.0405968	down-up	3.73	5.29	4.19	4.93	4.05	5.35	5.59	6.21	2.68	others
CsaV3_4G008840	175.02	58.6	71.73	44.04	23.87	37.74	82.77	149.73	71.23	0.000928254	0.990322	1.36e-05	down-up	29.59	30.46	27.27	27.03	19.29	23.73	33.11	37.14	23.45	others
CsaV3_4G008970	486.31	270.58	340.74	296.49	158.72	242.64	549.12	444.37	408.91	0.000821547	0.8393	7.36e-05	down-up	102.17	165.15	136.7	66.85	65.8	127.69	147.74	178.23	71.54	others
CsaV3_4G009390	8.41	5.39	4.31	2.6	2.08	1.79	8.72	9.91	8.3	0.000239555	0.611567	9.56e-11	down-up	4.37	7.93	4.63	7.04	6.7	3.5	7.43	12.14	7.25	others
CsaV3_4G010070	13.44	11.98	13.29	9.32	10.1	9.89	12.07	14.76	13.53	0.00946274	0.978037	0.0106936	down-up	2.32	3.08	2.25	1.8	0.98	1.99	2.74	2.66	2.27	others
CsaV3_4G010300	29.71	29.74	48.09	6.96	11.11	9.97	44.18	22.02	37.5	1.4e-06	0.979381	1.44e-05	down-up	11.38	20.27	15.08	15.99	11.7	12.45	11.9	16.24	6.62	others
CsaV3_4G010500	13.43	12.49	12.92	6.94	6.08	8.55	17.65	16.39	14.99	0.000136298	0.677237	1.57e-06	down-up	4.25	6.82	6.22	2.48	3.22	2.64	7.98	7.92	3.57	others
CsaV3_4G010540	4.76	12.22	5.76	0.67	1.21	2.38	4.92	3.93	6.29	0.000171902	0.689316	0.0030737	down-up	1.76	1.51	0.37	2.21	1.6	2.06	0.3	1.42	3.23	others
CsaV3_4G011730	150.61	60.28	65.56	18.09	11.15	8.78	158.62	196.46	65.23	8.07e-11	0.756916	9.5e-18	down-up	17	51.44	17.41	6.38	2.7	23.09	38.75	61.43	5.93	others
CsaV3_4G012000	288.73	129.31	132.74	118.21	58.4	92.54	166.24	240.6	174.15	0.00400622	0.997752	5.05e-05	down-up	32.97	48.66	35.6	20.06	11.9	20.18	48.16	53.12	24.05	down
CsaV3_4G012040	60.87	69.52	79.54	19.74	14.88	22.37	81.17	66.07	72.65	5.86e-16	0.98136	6.8e-17	down-up	7.08	13.87	9.34	1.77	1.76	3.58	8.56	11.78	4.87	down
CsaV3_4G012090	2.92	5.3	3.26	1.88	2.37	2.44	3.87	4.05	4.46	0.0160925	0.97027	0.00177224	down-up	0.7	0.17	0.89	0.33	0.6	1.7	0.76	1	0.29	others
CsaV3_4G012170	2.31	2.54	3.06	1.36	2.01	2.03	2.63	3.19	3.63	0.0498986	0.871563	0.00984404	down-up	0.12	0.33	0.25	0.16	0.15	0.28	0.24	0.48	0.08	others
CsaV3_4G013300	158.23	106.76	113.79	101.94	65.75	99.11	133.14	131.87	116.58	0.0222256	0.976234	0.0221234	down-up	14.27	29.83	21.44	17.22	12.63	12.84	35.5	29.15	13.56	others
CsaV3_4G014900	0.15	0.45	0.88	0.04	0	0	0.65	0.63	0.69	0.00410622	0.932291	0.000391837	down-up	0	0	0.14	0	0.11	0	0.04	0.11	0	others
CsaV3_4G017420	18.4	13.74	20.83	7.06	7.64	7.68	32.94	23.8	31.33	0.00380888	0.391828	1.06e-06	down-up	49.54	94.27	77.46	27.98	14.24	39.39	68.16	119.75	27.42	down
CsaV3_4G017460	10.04	5.83	9.69	4.81	2.24	1.99	4.35	15.55	4.95	0.000193138	0.978161	0.00500346	down-up	12.4	20.23	15.29	3.13	2.92	6.15	18.06	23.09	7.28	down
CsaV3_4G017470	46.08	47.15	42.67	29.46	24.6	28.06	57.92	44	44.07	2.68e-05	0.970261	9.13e-05	down-up	5.31	11.13	5.14	1.85	4.78	4.37	6.47	6.49	5.54	others
CsaV3_4G017510	287.61	266.67	318.36	211.53	231.77	214.77	263.91	258.23	348.09	0.000803895	0.945217	0.0175847	down-up	150.98	220.86	171.57	35.4	28.83	41.32	139.64	180.41	23.4	down
CsaV3_4G017520	66.52	83.25	86.94	48.85	50.8	63.04	71.94	84.49	82.6	0.0025127	0.993124	0.00389801	down-up	84.23	72.36	50.69	62.92	88.35	102.34	97.09	100.41	55.55	others
CsaV3_4G017550	438.31	237.76	275.55	186.64	85.64	147.52	509.49	443.13	387.29	0.00143871	0.618088	3.17e-08	down-up	93.06	147.43	98.19	65.06	53.86	92.96	145.9	185.37	71.94	others
CsaV3_4G023320	39.97	28.49	26.98	14.6	16.35	14.51	40.43	37.18	29.89	2.77e-06	0.942926	2.04e-09	down-up	0.58	1.41	1	0.87	1.04	0.59	1.4	1.1	1.4	others
CsaV3_4G023700	230.69	216.26	204.08	113.33	99.94	115.64	250.27	216.04	222.29	7.87e-12	0.996801	2.9e-08	down-up	68.93	103.19	75.28	21.53	18.43	55.16	84.13	102.09	41.71	down
CsaV3_4G023760	1.13	1.08	1.07	0.64	0.64	0.77	1.31	1.12	1.32	0.0175237	0.932832	0.00551201	down-up	0.24	0.46	0.25	0.11	0.15	0.04	0.45	0.81	0.2	others
CsaV3_4G023790	47.26	42.49	34.5	17.54	19.28	16.12	29.7	28.02	28.48	5.2e-08	0.211226	0.000520919	down-up	5.21	9.52	9.32	4.86	3.61	7.13	4.3	9.9	4.28	others
CsaV3_4G023930	473.04	324.35	340.96	169.32	137.31	177.46	277.04	434.01	382.21	5.58e-08	0.954375	1e-07	down-up	107.68	131.71	100.36	16.11	20.85	58.44	182.75	117.44	89.17	down
CsaV3_4G024060	136.66	92.31	66.12	53.17	21.54	32.92	127.82	94.24	94.04	0.000706356	0.975131	3.2e-05	down-up	51.82	49.49	18.27	95.63	76.85	76.34	38.37	39.79	45.68	up
CsaV3_4G024090	29.76	29.26	31.28	19.81	20.54	28.76	37.83	37	37.38	0.0384533	0.556413	0.00113592	down-up	16.02	23.78	17.1	6.05	7.29	11.75	25.07	31.13	11.01	down
CsaV3_4G024240	20.92	10.42	12.67	9.25	6.27	7.38	32.29	55.35	18.8	0.000783083	0.0342898	1.62e-10	down-up	6.08	7.27	5.89	13.5	10.55	19.53	10.67	14.27	6.27	up
CsaV3_4G024260	6.36	6.75	9.59	2.88	1.99	2.56	9.59	6.75	7.56	5.25e-09	0.985958	5.44e-10	down-up	0.33	0.18	0.33	0.33	0.49	0.06	0.09	0.3	0	others
CsaV3_4G024380	306.14	323.61	351.61	159.09	129.29	214.73	279.37	286.68	270.12	4.33e-06	0.595808	0.000394814	down-up	82.36	152.62	107.3	11.07	11.65	26.69	140.06	138.01	47.02	down
CsaV3_4G024400	64.56	50.62	54.92	35.21	32.71	32.05	56.73	53.58	75.48	0.000149451	0.964983	4.17e-05	down-up	18.61	37.92	25.74	14.93	22.38	18.78	20.79	30.31	23.68	others
CsaV3_4G024990	4.2	5.6	9.09	2.3	3.28	2.38	5.35	4.51	5.88	0.00256828	0.873595	0.0081192	down-up	9.76	8.44	2.86	1.85	2.51	4.33	3.72	4.27	4.94	others
CsaV3_4G025050	44.62	37.11	40.08	13.08	10.43	14	26.16	40.47	35.25	5.07e-11	0.779836	1.61e-06	down-up	113.84	50.72	42.88	30.19	24.46	86.58	57.71	49.79	20.98	others
CsaV3_4G025180	29.55	35.78	38.47	19.12	19.66	28.26	33.38	28.7	45.14	0.0191407	0.996313	0.026682	down-up	17.96	20.39	21.63	23.46	18.01	21.32	26.5	25.89	16.01	others
CsaV3_4G025310	178.28	214.44	223.16	149.56	168.15	186.86	241.8	186.16	205.67	0.0296665	0.994605	0.0452542	down-up	26.83	52.44	55.39	37.75	33.21	43.18	77.54	86.91	20.21	others
CsaV3_4G025620	19.13	16.15	19.1	8.39	12.47	12.37	22.66	20.82	27.4	0.00194929	0.593111	5.17e-06	down-up	6.58	6.95	5.25	5.4	5.91	9.13	9.2	11.08	5.86	others
CsaV3_4G025670	9.6	12.49	10.98	7.74	5.96	7.02	13.34	10.72	10.52	0.00447663	0.988655	0.00585084	down-up	6.28	5.44	5.98	3.91	4.12	5.47	4.45	3.2	3.94	others
CsaV3_4G025800	32.49	45.54	47.15	21.87	28.83	34.22	53.78	36.09	46.91	0.0166176	0.954686	0.00613816	down-up	10.07	25.53	20.49	8	9.78	18.13	25.32	30.26	9.47	others
CsaV3_4G025850	22.98	23.24	20.64	16.82	15.95	15.54	18.69	21.94	25.51	0.0041253	0.976053	0.0201547	down-up	6.95	8.46	7.51	3.75	3.63	6.12	7.38	18.36	5.59	others
CsaV3_4G025880	1021.79	486.51	591.22	418.57	244.16	356.42	801.1	958.29	784.05	0.00320602	0.895076	1.95e-07	down-up	212.01	294.85	298.59	77.7	58.8	85.15	267.82	326.93	91.13	down
CsaV3_4G025950	150.65	134.97	131.94	108	112.64	117.92	132.44	183.58	149.2	0.0150044	0.913745	0.00962186	down-up	49.78	69.42	59.94	26.66	26.81	30.62	50.63	66.05	39.01	down
CsaV3_4G025990	3.59	5.33	5.18	2.98	2.48	2.45	5.36	3.43	4.87	0.000506911	0.9691	0.00347562	down-up	1.42	1.79	1.06	0	0.23	0.66	1.36	1.24	0.68	down
CsaV3_4G026010	62.07	54.86	74.6	44.68	33.8	45.27	75.56	58.53	76.58	0.00452486	0.948871	0.000871064	down-up	27.89	34.78	27.87	16.55	18.7	26.19	52.11	50.75	23.11	others
CsaV3_4G026100	6770.95	2442.82	3072.16	1827.54	699.54	1017.67	5591.56	5455.06	2987.55	0.000188689	0.963798	1.21e-07	down-up	739.35	1143.29	1007.07	271.56	168.98	277.58	1151.13	1548.31	398.11	down
CsaV3_4G026260	389.99	505.16	441.1	192.08	195.46	242.7	277.53	386.2	267.76	3.62e-09	0.262222	0.0100474	down-up	71.16	183.23	107.09	27.44	67.77	171.69	296.46	213.84	136.21	others
CsaV3_4G026780	96.93	144.54	132.19	71.69	97.23	75.33	156.45	105.9	138.48	0.000364304	0.968734	3.23e-05	down-up	0.53	0.67	0.63	0	0.17	0.31	0.29	0.64	0.69	others
CsaV3_4G027160	68.73	7.12	8.44	3.48	2.42	6.62	28.79	43.02	53.01	0.0134819	0.881055	1.31e-07	down-up	0.78	0.59	0	6.41	5.72	5.12	1.26	0	0	up
CsaV3_4G027190	39.55	41.85	36.34	29.16	32.56	33.8	62.14	51.09	39.03	0.0200225	0.685769	0.00302195	down-up	5.15	4.7	4.78	4.56	3.62	5.23	6.1	6.75	8.23	others
CsaV3_4G027240	84.62	70.05	81.79	41.95	44.49	55.49	59.76	67.41	62.15	0.000223089	0.492925	0.0236557	down-up	8.74	17.89	15.15	8.8	14.52	13.21	22.86	23.12	9.8	others
CsaV3_4G027310	18.14	14.28	19.19	10.17	10.45	13.06	21.95	24.27	23.46	0.00162219	0.459333	8.08e-07	down-up	9.62	10.85	7.09	6.48	4.28	9.66	15.19	14.12	8.84	others
CsaV3_4G027340	112.5	126.57	125.38	79.93	94.33	88.45	116.08	104.45	161.4	0.000677574	0.989754	0.00785975	down-up	55.32	86.9	87.57	34.77	40.14	40.28	106.7	113.02	62.5	down
CsaV3_4G028120	25.58	48.97	53.54	24.14	43.41	36.77	48.06	35.69	52.85	0.0374844	0.943336	0.0048948	down-up	11.08	9.46	8.42	6.44	7.83	9.06	8.61	9.02	12.44	others
CsaV3_4G028210	9.98	8.7	10.87	6.84	6.71	6.7	9.49	10.15	9.74	0.00152027	0.979381	0.0026744	down-up	5.14	4.1	2.25	1.3	1.94	2.5	1.16	1.81	2.69	others
CsaV3_4G028450	6.14	4.56	3.81	2.07	2.23	1.89	5.18	7.32	4.09	0.000529839	0.950769	0.000158719	down-up	0.66	0.04	0	0.39	0	0.51	0	0.25	0	others
CsaV3_4G028610	16.52	9.77	10.96	9.5	6.52	7.28	15.11	14.3	10.34	0.0294109	0.985456	0.00668431	down-up	8.77	10	9.43	9.02	6.37	7.94	9.78	13.17	9.48	others
CsaV3_4G028620	2.46	3.17	4.31	0.27	0.26	0.26	2.47	1.86	2.69	0.0032585	0.863609	0.0242536	down-up	0.95	0.36	0	0	0	0	0	0.29	0	others
CsaV3_4G028640	46.44	41.75	47.74	12.48	11.5	10.9	28.47	31.22	29.24	1.81e-30	0.00843332	3.03e-12	down-up	28.43	23.43	14.58	18.91	15.43	22.07	34.21	20.48	28.58	others
CsaV3_4G028650	17.16	15.84	18.63	10.45	11.3	13.21	21	17.37	22.78	0.013643	0.859182	0.00189683	down-up	6.8	11.03	9.7	18.16	13.08	9.25	6.25	9.14	6.32	others
CsaV3_4G029230	291.5	328.14	267.43	100.07	111.02	123.88	230.76	211.55	202.68	1.86e-15	0.172004	3.78e-08	down-up	148.77	157.25	88.52	16.14	16.14	33.35	143.25	137.66	58.74	down
CsaV3_4G029540	18.8	30.28	14.6	1.34	2.46	0.82	3.51	4.07	1.76	4.41e-18	3.06e-09	0.0265875	down-up	0.51	0.97	1.68	0	0.35	0.1	0.39	0.89	0.89	down
CsaV3_4G029800	69.83	45.93	45.08	41.43	35.34	38.45	58.02	72.26	53.36	0.0139303	0.936321	0.000365992	down-up	18.12	22.7	20.08	12.42	6.61	14.18	14.97	20.34	10.03	others
CsaV3_4G029850	81.82	52.56	54.77	40.25	31.55	44.14	92.79	86.38	94.5	0.00776052	0.27845	7.53e-07	down-up	23	25.56	26.39	19.65	20.27	19.05	17.89	26.85	13.68	others
CsaV3_4G030100	12	10.36	9.97	2.2	2.75	2.72	5.45	8.37	7.01	3.72e-10	0.33776	0.000313071	down-up	0.26	0.47	0.78	0.15	0.59	0.12	0.26	1.51	1.25	others
CsaV3_4G030400	17.18	20.22	25.11	14.43	17.21	15.95	21.58	18.89	23.36	0.00835141	0.996919	0.00441759	down-up	16.75	14.38	11.3	9.99	8.77	12.39	11.28	10.95	15.31	others
CsaV3_4G030580	1866.5	797.05	969	487.62	255.47	384.79	1264.08	2032.74	1596.45	2.39e-05	0.807239	1.13e-12	down-up	419.84	722.08	572.31	177.05	133.99	323.93	708.17	883.76	262.43	down
CsaV3_4G030690	225.08	130.19	156.2	136.77	80.77	109.76	203.83	195.48	159.28	0.0283801	0.965398	0.00240892	down-up	43.05	86.05	52.14	26.41	21.77	33.8	59.4	102.93	44.2	down
CsaV3_4G030790	42.11	38.57	34.99	23.02	24.45	24.24	49.98	47.26	38.07	2.36e-05	0.888907	8.91e-06	down-up	6.54	11.2	10.35	5	4.79	6.26	10.8	16.58	6.7	others
CsaV3_4G031190	22.09	19.37	16.23	6.27	4.6	7.23	18.22	15.25	18.17	2.81e-09	0.850433	6.48e-09	down-up	6.22	11.09	8.56	3.41	1.64	4.85	11.64	13.92	6.04	down
CsaV3_4G031300	601.57	237.45	244.17	272.3	141.1	155.65	334.4	403.94	304.83	0.0334167	0.973844	0.00192169	down-up	46.14	94.67	50.33	27.57	21.82	54.89	82.29	132.65	21.74	others
CsaV3_4G031320	33.57	27.98	29.19	20.03	20.86	22.3	27.97	32.62	28.2	0.000457355	0.958475	0.00229023	down-up	1.8	8.08	5.06	5.5	2.22	5.82	10.7	15.06	3.65	others
CsaV3_4G031400	21.13	7.28	6.42	7.5	3.84	4.87	16.93	22.32	15.1	0.0423674	0.735916	2.01e-07	down-up	9.22	17.87	15.09	2.34	2.29	2.16	10.62	19.75	10.35	down
CsaV3_4G031480	8.3	3	3.82	2.13	1.72	2.42	6.36	7.13	5.61	0.00669497	0.907654	8.43e-08	down-up	6.44	5.35	2.52	2.66	1.8	2.71	4.98	5.13	2.42	others
CsaV3_4G031530	54.84	59.24	44.41	22.49	28.17	29.12	47.37	42.24	36.22	1.27e-06	0.532826	0.00259166	down-up	4.13	13.47	7.9	3.63	3.5	7.73	18.93	25.72	5.37	others
CsaV3_4G031720	1012.86	367.99	299.49	333.41	175.57	171.99	637.31	777.64	368.78	0.00941998	0.993124	7.18e-05	down-up	85.99	192.41	120.97	95.53	38.71	159.42	166.94	310.04	58.61	others
CsaV3_4G031850	74.71	39.27	44.68	32.37	19.14	34.49	89.73	104.94	94.56	0.0139928	0.144657	2.44e-10	down-up	12.96	29.83	27.53	11.35	5.12	18.05	19.48	32.36	10.32	others
CsaV3_4G032050	136.56	224.95	219.36	132.86	138.05	160.16	216.84	137.04	251.26	0.0448876	0.992636	0.0407577	down-up	63.84	76.63	79.3	11.94	18.52	24.38	109.7	108.28	52.08	down
CsaV3_4G032440	11.71	15.96	19.19	5.23	5.74	7.86	12.42	10.59	15.52	4.27e-05	0.790664	0.00164874	down-up	9.32	21.47	12.62	4.17	5.07	7.59	15.1	19.18	7.58	down
CsaV3_4G032480	51.71	47.82	66.17	34.15	31.09	46.54	53.54	47.6	58.8	0.0138554	0.951028	0.0171971	down-up	22.53	36.8	25.88	9.72	9.78	24.92	46.9	49.33	12.68	others
CsaV3_4G032570	7.98	4.76	7.75	2.23	1.81	2.04	9.76	13.99	8.17	1.25e-05	0.557676	7.84e-10	down-up	1.08	2.3	1.72	0.96	1.71	1.94	3.1	3.16	1.8	others
CsaV3_4G032770	6.65	10.18	2.5	1.57	0.61	1.56	8.7	4.94	2.49	0.000628177	0.943534	0.00174879	down-up	0.97	3.26	0.52	3.09	1.4	7.3	0.28	0.44	1.13	others
CsaV3_4G032780	35.55	21.27	22.07	9.93	9.5	15.35	29.23	36.57	32.74	0.000621493	0.839836	1.13e-07	down-up	14.91	17.72	13.47	10.01	9.82	14.11	14.12	20.63	11.82	others
CsaV3_4G032820	76.19	65.62	57.24	42.66	40.63	42.79	71.12	66.03	49.29	0.000326975	0.942492	0.00455001	down-up	62.36	41	31.81	24.41	17.94	54.12	48.08	41.42	21.39	others
CsaV3_4G032980	9.02	8.73	11.59	6.86	6.29	5.95	10.86	11.04	12.12	0.0101103	0.89505	0.000956621	down-up	3.89	3.25	1.93	0.64	1.87	1.43	3.67	3.34	1.96	others
CsaV3_4G033260	69.67	78.98	87.8	35.19	42.26	56.02	68.68	59.97	96.17	0.000193021	0.942545	0.00269037	down-up	21.64	24.52	21.43	5.16	7.66	12	23.45	23.4	10.59	down
CsaV3_4G033660	4.89	3.51	5.52	1.31	1.22	1.53	3.96	4.23	4.28	1e-07	0.899968	3.34e-07	down-up	5.2	8.88	4.65	0.79	1.22	2.9	5.6	5.72	1.79	down
CsaV3_4G033700	9.75	9.11	7.54	3.74	4.29	6.17	8.42	7.37	9.64	0.00160344	0.951028	0.0025886	down-up	3.64	4.89	2.02	10.99	12.52	14.41	4.83	5.67	3.48	up
CsaV3_4G033870	2108.08	964.37	999.45	692.29	433.91	439.43	2003.3	1841.74	1053.45	0.000280523	0.928071	8.61e-08	down-up	471.67	824.88	482.31	272.41	102.7	564.06	1006.86	1210.41	202.88	others
CsaV3_4G034050	24.35	39.41	39.27	13.39	12.94	26.47	30.72	33.78	32.43	0.0129835	0.951527	0.0128162	down-up	6.76	5.69	7.73	1.68	3.51	1.07	9.39	9.34	9.83	others
CsaV3_4G034070	29.57	26.64	24.03	11.47	16.11	14.36	19.69	21.58	21.71	6.94e-06	0.405335	0.00301068	down-up	6.37	6.14	5.43	2.58	4.35	6.49	6.28	8.58	8.52	others
CsaV3_4G034540	35.96	55.46	66.39	20.81	23.41	37.74	62.64	47.71	59.6	0.00325751	0.9691	0.000158421	down-up	8.96	24.39	22.48	5.34	8.56	9.26	43.16	41.92	9	down
CsaV3_4G034920	9.66	5.64	6.6	4.52	4	4.14	9.15	10.86	10.44	0.000830452	0.518053	1.3e-08	down-up	14.35	8.41	6.78	10.46	9.06	15.06	13.04	10.74	8.72	others
CsaV3_4G035590	35.38	40.68	53.62	25.69	26.55	34.16	62.53	55.37	82.61	0.0139076	0.261239	1.28e-06	down-up	23.19	43.05	25.46	13.84	10.64	13.34	42.44	50.61	16.7	down
CsaV3_4G035660	492.81	226.8	141.55	72.56	76.31	65.78	201.62	234.64	85.64	1.31e-06	0.569156	0.000155271	down-up	10.23	17.46	15.7	17.29	14.05	24.81	18.89	20.99	10.83	others
CsaV3_4G035870	103.93	113.83	133.4	57.32	68.21	91.95	116.21	118.36	183.73	0.002272	0.846732	0.000368157	down-up	23.23	54.2	42.44	15.89	14.35	25.27	50.65	75.89	17.82	down
CsaV3_4G036020	153.54	96.28	127.52	64.99	44.45	62.53	149.31	137.35	132.9	4.71e-05	0.94387	4.59e-08	down-up	29.78	75.91	45.37	29.38	21.17	38.78	60.27	73.66	24.95	others
CsaV3_4G036050	80.03	52.01	35.59	14.9	15.47	14.59	46.64	46.27	34.36	1.28e-07	0.737905	6.47e-08	down-up	4.63	5.65	4.53	8.46	11.14	12.05	7.08	13.96	5.64	up
CsaV3_4G036070	75.06	48.95	56.46	51.02	34.61	40.88	68.44	78.15	72.97	0.00633337	0.841677	2.73e-05	down-up	15.86	17.97	15.28	1.99	5.4	3.73	9.46	16.08	17.88	down
CsaV3_4G036230	62.41	29.72	21.8	18.72	11.11	9.42	33.08	37.05	29.18	0.000920791	0.914436	1.11e-05	down-up	6.99	11.9	7.36	8.4	6.66	10.07	6.46	9.19	10.4	others
CsaV3_4G036670	10.17	18.11	28.34	5.65	6.56	5.31	8.35	8.93	6.71	2.1e-06	0.0207664	0.0348588	down-up	4.67	4.03	2.87	5.57	4.01	5.21	4.11	3.13	5.84	others
CsaV3_4G036810	8.28	11.69	13.53	4.47	7.42	8.26	17.15	10.06	13.68	0.031526	0.869402	0.0040564	down-up	4.15	5	2.37	0.47	0.93	3.27	3.97	8.03	1.83	others
CsaV3_4G036970	7.68	6.37	7.76	4.82	3.09	5.7	12.57	10.2	7.58	0.0341814	0.636709	0.00111209	down-up	2.17	2.02	1.52	2.81	1.19	3.02	2.76	5.87	0	others
CsaV3_4G037000	19.76	83.61	73.88	12.17	22.85	16.13	40.74	31.27	52.72	0.000330078	0.758909	1.69e-05	down-up	81.16	68.11	81.07	6.04	19.09	11.12	86.07	46.58	39.69	down
CsaV3_4G037050	91.1	56.85	55.52	54.37	43.54	43.92	72.48	81.74	59.4	0.0216661	0.9906	0.00278799	down-up	12.67	25.95	19.87	12.29	11.27	14.88	18.16	22.63	22.65	others
CsaV3_4G037130	566.58	208.95	238.15	200.89	80.2	160.9	483.46	563.74	389.13	0.0132772	0.781126	6.03e-07	down-up	38.52	51.01	49.03	25.71	25.08	28.55	39.29	52.25	28.29	down
CsaV3_4G037480	2954.76	1997.98	2109.6	1125.58	782.18	981.88	2919.47	2346.45	2715.81	2.44e-11	0.960522	2.47e-12	down-up	520.21	690.05	575.67	244.64	145.02	265.01	423.67	609.7	158.49	down
CsaV3_4G037510	130.29	146.75	138.14	97.99	87.14	106.43	216.83	156.6	180.63	0.0366644	0.91013	0.0085044	down-up	85.26	120.6	109.04	63.79	49.75	94.58	133.02	139.02	64.18	others
CsaV3_4G037950	41.44	29.78	28.36	21.14	19.14	23.13	32.48	34.52	26.57	0.00541458	0.942926	0.00693992	down-up	8.68	10.93	6.11	4.52	4.44	11.69	10.88	10.42	12.97	others
CsaV3_4G037980	308.62	296.2	340.92	170.62	177.5	203.08	359.96	342.34	348.73	9.6e-07	0.898901	4.79e-08	down-up	46.62	85.5	59.3	22.26	21.05	40.69	72.52	96.28	31.84	down
CsaV3_5G000090	60.48	36.51	25.24	10.03	11	12.39	100.92	74.23	55.89	9.59e-08	0.176185	8.69e-21	down-up	48.03	68.13	41.1	15.65	28.59	18.34	56.49	64.18	24.09	down
CsaV3_5G000140	53.62	76.22	65.78	16.61	24.86	19.31	72.92	45.63	53.15	2.73e-18	0.844232	1.56e-12	down-up	12.26	14.4	14.56	6.39	9.37	8.74	14.05	20.33	17.24	others
CsaV3_5G000160	652.26	847.55	809.9	51.29	73.36	66.75	957.57	531.06	591.12	1.71e-31	0.943336	5.47e-21	down-up	243.58	255.88	205.78	86	101.68	97.48	313.27	274.45	291.46	down
CsaV3_5G000210	84.69	58.73	51.81	23.46	26.62	34.28	87.7	86.53	76.11	3.23e-05	0.758828	2.59e-11	down-up	21.71	33.71	24.34	7.57	6.42	13.05	41.69	38.36	23.11	down
CsaV3_5G000290	4.31	6.12	4.01	2.59	1.9	2.11	9.21	4.49	4.47	0.0104262	0.901122	0.00395564	down-up	1.9	2.4	1.61	2.02	1.55	5.27	0.74	2.94	1.73	others
CsaV3_5G000530	341.3	253.05	144.31	84.72	117.12	68.77	146.35	136.75	150.23	4.51e-05	0.0832603	0.0104899	down-up	7.11	6.85	6.15	4.88	6.4	3.94	7.4	14.6	16.23	others
CsaV3_5G000640	175.1	124.02	139.22	114.9	78.2	101.47	153.62	196.53	126.86	0.0135487	0.968734	0.0048948	down-up	31.98	54.81	46.8	20.28	16.7	31.13	45.89	60.39	24.83	down
CsaV3_5G000740	5.98	6.34	6.55	3.52	4.28	4.46	11.5	7	7.32	0.00676549	0.656759	0.000482878	down-up	1.7	1.53	1.93	2.57	3.13	5.1	1.08	3.24	0.91	up
CsaV3_5G000860	2.21	3.62	1.88	0.93	1.11	0.74	2.78	2.04	1.86	9.83e-05	0.909036	0.000462517	down-up	0.63	1.48	1.17	1.06	0.71	2.23	0.21	0.99	1.38	others
CsaV3_5G001100	12.76	12.45	12.33	7.19	8.5	10.04	12.24	13.77	13.99	0.0144852	0.976179	0.0107951	down-up	3.54	6.61	3.04	2.13	1.02	3.18	5.47	6.18	3.4	others
CsaV3_5G001200	190.71	127.64	119.26	98.29	79.85	94.07	168.04	158.35	157.14	0.0059314	0.955408	7.1e-06	down-up	40.65	65.5	53.87	29.78	29.04	32.08	48.8	72.93	25.18	others
CsaV3_5G001210	16.4	11.9	14.43	7.39	5.09	4.25	18.62	18.57	14.77	7.57e-05	0.856941	1.12e-06	down-up	11.09	15.97	8.19	1.26	2.55	3.63	7.47	17.31	0.4	down
CsaV3_5G001300	37.49	51.22	52.27	17.88	30.05	25.32	60.34	33.93	36.54	0.000366969	0.949032	0.00884212	down-up	41.16	16.55	14.79	49.63	37.48	35.98	29.82	18.48	19.28	others
CsaV3_5G001320	62.5	56.41	69.83	42.44	29.3	44.04	69.64	73.51	70.04	0.000180409	0.917462	1.6e-05	down-up	8.77	13.53	9.65	4.53	6.83	2.56	10.39	12.35	11.1	others
CsaV3_5G001420	35.34	31.03	34.29	15.75	13.03	17.63	48.54	44.39	34.01	4.46e-07	0.724833	1.61e-08	down-up	16.78	40.11	28.16	6.8	10.13	16.07	53.98	63.64	12	down
CsaV3_5G001450	41.89	65.67	54.7	22.57	30.22	27.17	74.37	34.15	58.25	1.98e-05	0.997319	0.000677445	down-up	28.72	40.38	24.24	7.24	12.51	22.26	42.15	48.88	20.42	others
CsaV3_5G001510	13.63	13.4	17.3	8.64	8.74	8.8	16.34	19.6	26.68	0.000755053	0.535797	3.38e-06	down-up	6.72	9.98	7.02	8.04	6.24	12.96	7.29	12.9	4.52	others
CsaV3_5G001520	34.47	31.16	37.81	14.45	17.82	16.5	34.43	34.98	37.33	3.3e-08	0.995935	2.29e-08	down-up	16.97	17.53	15.51	19.82	20.21	27.76	21.06	22.84	14.62	up
CsaV3_5G001890	75.58	97.5	99.86	35.28	40.79	44.46	177.98	116.44	156.84	7.14e-10	0.0687239	7.35e-17	down-up	38.41	77.4	54.2	18.65	19.13	37.69	99.27	114.81	30.37	down
CsaV3_5G002010	19.85	24.39	21.98	14.4	14.27	15.4	31.74	27.31	24.11	0.00255378	0.723226	0.000138879	down-up	7.37	9.64	7.88	5.84	4.01	4.1	9.29	15.96	5.79	others
CsaV3_5G002230	18.05	19.33	23.6	7.21	9.89	11.73	28.04	22.62	24.74	1.53e-05	0.710505	4.28e-08	down-up	3.88	8.8	5.37	1.47	1.39	5.06	13.32	16.15	0.81	others
CsaV3_5G002250	108.25	173.97	162.44	53.89	79.04	89.94	149.53	113.39	174.26	0.000154355	0.977839	0.000112574	down-up	158.66	116.85	70.43	45.39	50.26	84.29	90.76	94.04	47.47	others
CsaV3_5G002570	95.07	114.68	89.32	35.75	36.23	48.6	106.84	69.34	91.97	5.27e-09	0.867662	4.3e-06	down-up	36.01	54.97	40.96	5.73	6.03	11.86	79.85	69.12	34.16	down
CsaV3_5G002690	282.44	334.4	315.66	198.7	264.7	239.26	336.44	323.67	305.72	0.00269477	0.990261	0.00431214	down-up	156.85	214.83	160.73	89.18	92.99	155.89	221.21	254.63	168.05	others
CsaV3_5G002790	22.57	22.87	25.53	17.14	20.02	17.24	21.49	21.84	22.82	0.0023672	0.856891	0.0364152	down-up	4.39	8.86	6.94	2.42	2.83	4.88	5.18	9.84	3.85	others
CsaV3_5G002870	24.08	31.99	33.16	18.63	12.44	22.33	45.53	33.82	39.49	0.0366642	0.713648	0.00120859	down-up	15.32	19.36	20.21	14.26	15.85	19.5	13.87	22.83	20.9	others
CsaV3_5G002940	19.08	20.71	21.57	13.21	15.51	16.19	22.07	20.01	23.68	0.0036398	0.964542	0.00285736	down-up	20.09	31.28	22.95	3.27	5.7	11.42	28.87	34.08	10.84	down
CsaV3_5G002960	25.2	35.18	36.95	22.07	25.74	23.64	33.4	29.34	36.49	0.0072599	0.998717	0.00370051	down-up	23.74	21.84	15.73	12.86	10.67	23.45	24.46	25.63	24.35	others
CsaV3_5G002980	24.44	27.23	30.21	13.94	14.03	20.07	45.54	40.62	29.65	0.00766072	0.559731	0.000112078	down-up	11.74	26.37	30.51	8.88	1.96	2.28	10.72	26.63	27.85	down
[truncated: 570 more rows]

## Sheet: others
Table 2e The expression of non-cold response (others) genes in WT and Csrboh5.1 mutants
[truncated: 13,328 more rows]
