# Supplementary material for: Knockout CsRBOH5.1 causes global decrease of H3K4me3 on genes during recovery after cold stress acclimation, leading to acclimation failure
Source: Research Square preprint supplement (doi:10.21203/rs.3.rs-3226653/v1), 2023-08-03
Supplement: Supplementary file 7 [file Extended Data Table 3.xlsx]

## Sheet: GO_um
Table 3a The GO enrichment analysis of up-memory genes
GO-ID	p-value	corr p-value	x	n	ratio	X	N	Description	Genes in test set
42254	1.7672e-51	3.128e-49	42	364	0.115385	63	13522	ribosome biogenesis	CSA6G021530|CSA3G022680|CSA6G046990|CSA5G001000|CSA3G026840|CSA2G002790|CSA6G034270|CSA6G051000|CSA6G002550|CSA7G001960|CSA3G032360|CSA5G039260|CSA1G015150|CSA3G018380|CSA2G012470|CSA2G011060|CSA5G030340|CSA5G005450|CSA6G007430|CSA3G003150|CSA5G026230|CSA6G002760|CSA5G038460|CSA5G005530|CSA4G013280|CSA1G003930|CSA5G023800|CSA5G030080|CSA5G032570|CSA3G035460|CSA5G008790|CSA2G011490|CSA4G011790|CSA…
22613	4.083e-51	3.6134e-49	42	371	0.113208	63	13522	ribonucleoprotein complex biogenesis	CSA6G021530|CSA3G022680|CSA6G046990|CSA5G001000|CSA3G026840|CSA2G002790|CSA6G034270|CSA6G051000|CSA6G002550|CSA7G001960|CSA3G032360|CSA5G039260|CSA1G015150|CSA3G018380|CSA2G012470|CSA2G011060|CSA5G030340|CSA5G005450|CSA6G007430|CSA3G003150|CSA5G026230|CSA6G002760|CSA5G038460|CSA5G005530|CSA4G013280|CSA1G003930|CSA5G023800|CSA5G030080|CSA5G032570|CSA3G035460|CSA5G008790|CSA2G011490|CSA4G011790|CSA…
3735	2.233e-47	1.3175e-45	38	301	0.126246	63	13522	structural constituent of ribosome	CSA6G021530|CSA3G022680|CSA6G046990|CSA5G001000|CSA6G034270|CSA6G051000|CSA6G002550|CSA7G001960|CSA3G032360|CSA5G039260|CSA1G015150|CSA3G018380|CSA2G012470|CSA2G011060|CSA5G030340|CSA5G005450|CSA6G007430|CSA3G003150|CSA5G026230|CSA6G002760|CSA5G038460|CSA1G003930|CSA5G023800|CSA5G030080|CSA5G032570|CSA3G035460|CSA5G008790|CSA2G011490|CSA4G011790|CSA5G005100|CSA4G032310|CSA7G008490|CSA1G014820|CSA…
5198	8.968e-45	3.5535e-43	38	350	0.108571	63	13522	structural molecule activity	CSA6G021530|CSA3G022680|CSA6G046990|CSA5G001000|CSA6G034270|CSA6G051000|CSA6G002550|CSA7G001960|CSA3G032360|CSA5G039260|CSA1G015150|CSA3G018380|CSA2G012470|CSA2G011060|CSA5G030340|CSA5G005450|CSA6G007430|CSA3G003150|CSA5G026230|CSA6G002760|CSA5G038460|CSA1G003930|CSA5G023800|CSA5G030080|CSA5G032570|CSA3G035460|CSA5G008790|CSA2G011490|CSA4G011790|CSA5G005100|CSA4G032310|CSA7G008490|CSA1G014820|CSA…
6412	1.0038e-44	3.5535e-43	38	351	0.108262	63	13522	translation	CSA6G021530|CSA3G022680|CSA6G046990|CSA5G001000|CSA6G034270|CSA6G051000|CSA6G002550|CSA7G001960|CSA3G032360|CSA5G039260|CSA1G015150|CSA3G018380|CSA2G012470|CSA2G011060|CSA5G030340|CSA5G005450|CSA6G007430|CSA3G003150|CSA5G026230|CSA6G002760|CSA5G038460|CSA1G003930|CSA5G023800|CSA5G030080|CSA5G032570|CSA3G035460|CSA5G008790|CSA2G011490|CSA4G011790|CSA5G005100|CSA4G032310|CSA7G008490|CSA1G014820|CSA…
44085	9.6992e-44	2.7878e-42	42	549	0.0765027	63	13522	cellular component biogenesis	CSA6G021530|CSA3G022680|CSA6G046990|CSA5G001000|CSA3G026840|CSA2G002790|CSA6G034270|CSA6G051000|CSA6G002550|CSA7G001960|CSA3G032360|CSA5G039260|CSA1G015150|CSA3G018380|CSA2G012470|CSA2G011060|CSA5G030340|CSA5G005450|CSA6G007430|CSA3G003150|CSA5G026230|CSA6G002760|CSA5G038460|CSA5G005530|CSA4G013280|CSA1G003930|CSA5G023800|CSA5G030080|CSA5G032570|CSA3G035460|CSA5G008790|CSA2G011490|CSA4G011790|CSA…
5840	1.1025e-43	2.7878e-42	38	373	0.101877	63	13522	ribosome	CSA6G021530|CSA3G022680|CSA6G046990|CSA5G001000|CSA6G034270|CSA6G051000|CSA6G002550|CSA7G001960|CSA3G032360|CSA5G039260|CSA1G015150|CSA3G018380|CSA2G012470|CSA2G011060|CSA5G030340|CSA5G005450|CSA6G007430|CSA3G003150|CSA5G026230|CSA6G002760|CSA5G038460|CSA1G003930|CSA5G023800|CSA5G030080|CSA5G032570|CSA3G035460|CSA5G008790|CSA2G011490|CSA4G011790|CSA5G005100|CSA4G032310|CSA7G008490|CSA1G014820|CSA…
30529	2.6033e-43	5.7598e-42	39	422	0.0924171	63	13522	ribonucleoprotein complex	CSA6G021530|CSA3G022680|CSA6G046990|CSA5G001000|CSA6G034270|CSA6G051000|CSA6G002550|CSA7G001960|CSA3G032360|CSA5G039260|CSA1G015150|CSA3G018380|CSA2G012470|CSA2G011060|CSA5G030340|CSA5G005450|CSA6G007430|CSA3G003150|CSA5G026230|CSA6G002760|CSA5G038460|CSA4G013280|CSA1G003930|CSA5G023800|CSA5G030080|CSA5G032570|CSA3G035460|CSA5G008790|CSA2G011490|CSA4G011790|CSA5G005100|CSA4G032310|CSA7G008490|CSA…
43232	4.792e-38	8.4818e-37	42	748	0.0561497	63	13522	intracellular non-membrane-bounded organelle	CSA6G021530|CSA3G022680|CSA6G046990|CSA5G001000|CSA2G002790|CSA6G034270|CSA6G051000|CSA6G002550|CSA7G001960|CSA3G032360|CSA5G039260|CSA1G015150|CSA3G018380|CSA2G012470|CSA2G011060|CSA5G030340|CSA5G005450|CSA6G007430|CSA3G003150|CSA5G026230|CSA2G025380|CSA1G006340|CSA6G002760|CSA5G038460|CSA4G013280|CSA1G003930|CSA5G023800|CSA5G030080|CSA5G032570|CSA3G035460|CSA5G008790|CSA2G011490|CSA4G011790|CSA…
43228	4.792e-38	8.4818e-37	42	748	0.0561497	63	13522	non-membrane-bounded organelle	CSA6G021530|CSA3G022680|CSA6G046990|CSA5G001000|CSA2G002790|CSA6G034270|CSA6G051000|CSA6G002550|CSA7G001960|CSA3G032360|CSA5G039260|CSA1G015150|CSA3G018380|CSA2G012470|CSA2G011060|CSA5G030340|CSA5G005450|CSA6G007430|CSA3G003150|CSA5G026230|CSA2G025380|CSA1G006340|CSA6G002760|CSA5G038460|CSA4G013280|CSA1G003930|CSA5G023800|CSA5G030080|CSA5G032570|CSA3G035460|CSA5G008790|CSA2G011490|CSA4G011790|CSA…
10467	3.1053e-34	4.9968e-33	39	717	0.0543933	63	13522	gene expression	CSA6G021530|CSA3G022680|CSA6G046990|CSA5G001000|CSA6G034270|CSA6G051000|CSA6G002550|CSA7G001960|CSA3G032360|CSA5G039260|CSA1G015150|CSA1G005920|CSA3G018380|CSA2G012470|CSA2G011060|CSA5G030340|CSA5G005450|CSA6G007430|CSA3G003150|CSA5G026230|CSA6G002760|CSA5G038460|CSA1G003930|CSA5G023800|CSA5G030080|CSA5G032570|CSA3G035460|CSA5G008790|CSA2G011490|CSA4G011790|CSA5G005100|CSA4G032310|CSA7G008490|CSA…
34645	1.015e-32	1.4971e-31	38	719	0.0528512	63	13522	cellular macromolecule biosynthetic process	CSA6G021530|CSA3G022680|CSA6G046990|CSA5G001000|CSA6G034270|CSA6G051000|CSA6G002550|CSA7G001960|CSA3G032360|CSA5G039260|CSA1G015150|CSA3G018380|CSA2G012470|CSA2G011060|CSA5G030340|CSA5G005450|CSA6G007430|CSA3G003150|CSA5G026230|CSA6G002760|CSA5G038460|CSA1G003930|CSA5G023800|CSA5G030080|CSA5G032570|CSA3G035460|CSA5G008790|CSA2G011490|CSA4G011790|CSA5G005100|CSA4G032310|CSA7G008490|CSA1G014820|CSA…
9059	9.0017e-32	1.2256e-30	38	762	0.0498688	63	13522	macromolecule biosynthetic process	CSA6G021530|CSA3G022680|CSA6G046990|CSA5G001000|CSA6G034270|CSA6G051000|CSA6G002550|CSA7G001960|CSA3G032360|CSA5G039260|CSA1G015150|CSA3G018380|CSA2G012470|CSA2G011060|CSA5G030340|CSA5G005450|CSA6G007430|CSA3G003150|CSA5G026230|CSA6G002760|CSA5G038460|CSA1G003930|CSA5G023800|CSA5G030080|CSA5G032570|CSA3G035460|CSA5G008790|CSA2G011490|CSA4G011790|CSA5G005100|CSA4G032310|CSA7G008490|CSA1G014820|CSA…
44444	3.7564e-30	4.7492e-29	38	842	0.0451306	63	13522	cytoplasmic part	CSA6G021530|CSA3G022680|CSA6G046990|CSA5G001000|CSA6G034270|CSA6G051000|CSA6G002550|CSA7G001960|CSA3G032360|CSA5G039260|CSA1G015150|CSA3G018380|CSA2G012470|CSA2G011060|CSA5G030340|CSA5G005450|CSA6G007430|CSA3G003150|CSA5G026230|CSA6G002760|CSA5G038460|CSA1G003930|CSA5G023800|CSA5G030080|CSA5G032570|CSA3G035460|CSA5G008790|CSA2G011490|CSA4G011790|CSA5G005100|CSA4G032310|CSA7G008490|CSA1G014820|CSA…
5737	6.2457e-27	7.37e-26	38	1029	0.0369291	63	13522	cytoplasm	CSA6G021530|CSA3G022680|CSA6G046990|CSA5G001000|CSA6G034270|CSA6G051000|CSA6G002550|CSA7G001960|CSA3G032360|CSA5G039260|CSA1G015150|CSA3G018380|CSA2G012470|CSA2G011060|CSA5G030340|CSA5G005450|CSA6G007430|CSA3G003150|CSA5G026230|CSA6G002760|CSA5G038460|CSA1G003930|CSA5G023800|CSA5G030080|CSA5G032570|CSA3G035460|CSA5G008790|CSA2G011490|CSA4G011790|CSA5G005100|CSA4G032310|CSA7G008490|CSA1G014820|CSA…
44249	3.5118e-23	3.8849e-22	38	1305	0.0291188	63	13522	cellular biosynthetic process	CSA6G021530|CSA3G022680|CSA6G046990|CSA5G001000|CSA6G034270|CSA6G051000|CSA6G002550|CSA7G001960|CSA3G032360|CSA5G039260|CSA1G015150|CSA3G018380|CSA2G012470|CSA2G011060|CSA5G030340|CSA5G005450|CSA6G007430|CSA3G003150|CSA5G026230|CSA6G002760|CSA5G038460|CSA1G003930|CSA5G023800|CSA5G030080|CSA5G032570|CSA3G035460|CSA5G008790|CSA2G011490|CSA4G011790|CSA5G005100|CSA4G032310|CSA7G008490|CSA1G014820|CSA…
9058	5.8485e-23	6.0894e-22	39	1424	0.0273876	63	13522	biosynthetic process	CSA6G021530|CSA3G022680|CSA6G046990|CSA5G001000|CSA6G034270|CSA6G051000|CSA6G002550|CSA7G001960|CSA3G017450|CSA3G032360|CSA5G039260|CSA1G015150|CSA3G018380|CSA2G012470|CSA2G011060|CSA5G030340|CSA5G005450|CSA6G007430|CSA3G003150|CSA5G026230|CSA6G002760|CSA5G038460|CSA1G003930|CSA5G023800|CSA5G030080|CSA5G032570|CSA3G035460|CSA5G008790|CSA2G011490|CSA4G011790|CSA5G005100|CSA4G032310|CSA7G008490|CSA…
44267	7.1471e-22	7.028e-21	41	1748	0.0234554	63	13522	cellular protein metabolic process	CSA6G021530|CSA3G022680|CSA6G046990|CSA5G001000|CSA6G034270|CSA6G051000|CSA6G002550|CSA7G001960|CSA3G032360|CSA5G039260|CSA1G015150|CSA3G018380|CSAUNG100750|CSA2G012470|CSA2G011060|CSA5G030340|CSA5G005450|CSA6G007430|CSA1G045550|CSA3G003150|CSA5G026230|CSA6G002760|CSA5G038460|CSA1G003930|CSA5G035090|CSA5G023800|CSA5G030080|CSA5G032570|CSA3G035460|CSA5G008790|CSA2G011490|CSA4G011790|CSA5G005100|CS…
43229	7.1646e-21	6.3407e-20	42	1980	0.0212121	63	13522	intracellular organelle	CSA6G021530|CSA3G022680|CSA6G046990|CSA5G001000|CSA2G002790|CSA6G034270|CSA6G051000|CSA6G002550|CSA7G001960|CSA3G032360|CSA5G039260|CSA1G015150|CSA3G018380|CSA2G012470|CSA2G011060|CSA5G030340|CSA5G005450|CSA6G007430|CSA3G003150|CSA5G026230|CSA2G025380|CSA1G006340|CSA6G002760|CSA5G038460|CSA4G013280|CSA1G003930|CSA5G023800|CSA5G030080|CSA5G032570|CSA3G035460|CSA5G008790|CSA2G011490|CSA4G011790|CSA…
43226	7.1646e-21	6.3407e-20	42	1980	0.0212121	63	13522	organelle	CSA6G021530|CSA3G022680|CSA6G046990|CSA5G001000|CSA2G002790|CSA6G034270|CSA6G051000|CSA6G002550|CSA7G001960|CSA3G032360|CSA5G039260|CSA1G015150|CSA3G018380|CSA2G012470|CSA2G011060|CSA5G030340|CSA5G005450|CSA6G007430|CSA3G003150|CSA5G026230|CSA2G025380|CSA1G006340|CSA6G002760|CSA5G038460|CSA4G013280|CSA1G003930|CSA5G023800|CSA5G030080|CSA5G032570|CSA3G035460|CSA5G008790|CSA2G011490|CSA4G011790|CSA…
33279	1.6293e-19	1.3732e-18	13	55	0.236364	63	13522	ribosomal subunit	CSA6G021530|CSA3G022680|CSA6G002760|CSA1G015150|CSA5G032570|CSA2G011490|CSA5G030340|CSA5G005450|CSA4G011790|CSA1G014820|CSA7G022360|CSA3G012600|CSA3G030910
32991	2.3858e-19	1.9195e-18	39	1790	0.0217877	63	13522	macromolecular complex	CSA6G021530|CSA3G022680|CSA6G046990|CSA5G001000|CSA6G034270|CSA6G051000|CSA6G002550|CSA7G001960|CSA3G032360|CSA5G039260|CSA1G015150|CSA3G018380|CSA2G012470|CSA2G011060|CSA5G030340|CSA5G005450|CSA6G007430|CSA3G003150|CSA5G026230|CSA6G002760|CSA5G038460|CSA4G013280|CSA1G003930|CSA5G023800|CSA5G030080|CSA5G032570|CSA3G035460|CSA5G008790|CSA2G011490|CSA4G011790|CSA5G005100|CSA4G032310|CSA7G008490|CSA…
19538	6.2557e-19	4.8141e-18	41	2090	0.0196172	63	13522	protein metabolic process	CSA6G021530|CSA3G022680|CSA6G046990|CSA5G001000|CSA6G034270|CSA6G051000|CSA6G002550|CSA7G001960|CSA3G032360|CSA5G039260|CSA1G015150|CSA3G018380|CSAUNG100750|CSA2G012470|CSA2G011060|CSA5G030340|CSA5G005450|CSA6G007430|CSA1G045550|CSA3G003150|CSA5G026230|CSA6G002760|CSA5G038460|CSA1G003930|CSA5G035090|CSA5G023800|CSA5G030080|CSA5G032570|CSA3G035460|CSA5G008790|CSA2G011490|CSA4G011790|CSA5G005100|CS…
44260	4.1053e-18	3.0276e-17	44	2623	0.0167747	63	13522	cellular macromolecule metabolic process	CSA6G021530|CSA3G022680|CSA6G046990|CSA5G001000|CSA6G034270|CSA6G051000|CSA6G002550|CSA7G001960|CSA3G032360|CSA5G039260|CSA1G015150|CSA1G005920|CSA3G018380|CSAUNG100750|CSA2G012470|CSA2G011060|CSA5G030340|CSA5G005450|CSA6G007430|CSA1G045550|CSA3G003150|CSA5G026230|CSA6G002760|CSA5G038460|CSA4G013280|CSA1G003930|CSA5G035090|CSA5G023800|CSA5G030080|CSA5G032570|CSA3G035460|CSA5G008790|CSA2G011490|CS…
44424	3.4869e-17	2.4688e-16	42	2470	0.017004	63	13522	intracellular part	CSA6G021530|CSA3G022680|CSA6G046990|CSA5G001000|CSA2G002790|CSA6G034270|CSA6G051000|CSA6G002550|CSA7G001960|CSA3G032360|CSA5G039260|CSA1G015150|CSA3G018380|CSA2G012470|CSA2G011060|CSA5G030340|CSA5G005450|CSA6G007430|CSA3G003150|CSA5G026230|CSA2G025380|CSA1G006340|CSA6G002760|CSA5G038460|CSA4G013280|CSA1G003930|CSA5G023800|CSA5G030080|CSA5G032570|CSA3G035460|CSA5G008790|CSA2G011490|CSA4G011790|CSA…
5622	1.5787e-16	1.0747e-15	42	2571	0.0163361	63	13522	intracellular	CSA6G021530|CSA3G022680|CSA6G046990|CSA5G001000|CSA2G002790|CSA6G034270|CSA6G051000|CSA6G002550|CSA7G001960|CSA3G032360|CSA5G039260|CSA1G015150|CSA3G018380|CSA2G012470|CSA2G011060|CSA5G030340|CSA5G005450|CSA6G007430|CSA3G003150|CSA5G026230|CSA2G025380|CSA1G006340|CSA6G002760|CSA5G038460|CSA4G013280|CSA1G003930|CSA5G023800|CSA5G030080|CSA5G032570|CSA3G035460|CSA5G008790|CSA2G011490|CSA4G011790|CSA…
43170	1.045e-15	6.8507e-15	44	3018	0.0145792	63	13522	macromolecule metabolic process	CSA6G021530|CSA3G022680|CSA6G046990|CSA5G001000|CSA6G034270|CSA6G051000|CSA6G002550|CSA7G001960|CSA3G032360|CSA5G039260|CSA1G015150|CSA1G005920|CSA3G018380|CSAUNG100750|CSA2G012470|CSA2G011060|CSA5G030340|CSA5G005450|CSA6G007430|CSA1G045550|CSA3G003150|CSA5G026230|CSA6G002760|CSA5G038460|CSA4G013280|CSA1G003930|CSA5G035090|CSA5G023800|CSA5G030080|CSA5G032570|CSA3G035460|CSA5G008790|CSA2G011490|CS…
15935	1.0611e-14	6.7078e-14	9	31	0.290323	63	13522	small ribosomal subunit	CSA5G032570|CSA6G021530|CSA5G005450|CSA4G011790|CSA6G002760|CSA7G022360|CSA3G012600|CSA1G015150|CSA3G030910
44237	1.4687e-12	8.964e-12	45	3829	0.0117524	63	13522	cellular metabolic process	CSA6G021530|CSA3G022680|CSA3G027210|CSA6G046990|CSA5G001000|CSA6G034270|CSA6G051000|CSA6G002550|CSA7G001960|CSA3G032360|CSA5G039260|CSA1G015150|CSA1G005920|CSA3G018380|CSAUNG100750|CSA2G012470|CSA2G011060|CSA5G030340|CSA5G005450|CSA6G007430|CSA1G045550|CSA3G003150|CSA5G026230|CSA6G002760|CSA5G038460|CSA4G013280|CSA1G003930|CSA5G035090|CSA5G023800|CSA5G030080|CSA5G032570|CSA3G035460|CSA5G008790|CS…
44238	7.5366e-12	4.4466e-11	46	4188	0.0109838	63	13522	primary metabolic process	CSA6G021530|CSA3G022680|CSA3G027210|CSA6G046990|CSA5G001000|CSA6G034270|CSA6G051000|CSA6G002550|CSA7G001960|CSA3G017450|CSA3G032360|CSA5G039260|CSA1G015150|CSA1G005920|CSA3G018380|CSAUNG100750|CSA2G012470|CSA2G011060|CSA5G030340|CSA5G005450|CSA6G007430|CSA1G045550|CSA3G003150|CSA5G026230|CSA6G002760|CSA5G038460|CSA4G013280|CSA1G003930|CSA5G035090|CSA5G023800|CSA5G030080|CSA5G032570|CSA3G035460|CS…
5575	2.0361e-11	1.1625e-10	45	4103	0.0109676	63	13522	cellular_component	CSA1G001480|CSA6G021530|CSA3G022680|CSA6G046990|CSA5G001000|CSA2G002790|CSA6G034270|CSA6G051000|CSA6G002550|CSA7G001960|CSA3G032360|CSA5G039260|CSA1G015150|CSA3G018380|CSA2G012470|CSA2G011060|CSA5G030340|CSA5G005450|CSA6G007430|CSA3G003150|CSA5G026230|CSA2G025380|CSA1G006340|CSA6G002760|CSA5G038460|CSA4G013280|CSA1G003930|CSA5G023800|CSA5G030080|CSA5G032570|CSA3G035460|CSA5G008790|CSA2G011490|CSA…
3723	2.2829e-11	1.2627e-10	14	275	0.0509091	63	13522	RNA binding	CSA3G022680|CSA1G006340|CSA5G001000|CSA2G002790|CSA1G015150|CSA1G005920|CSA5G023800|CSA5G030080|CSA5G032570|CSA5G005450|CSA4G011790|CSA1G014820|CSA7G022360|CSA3G012600
5623	3.5101e-11	1.8273e-10	44	3973	0.0110748	63	13522	cell	CSA1G001480|CSA6G021530|CSA3G022680|CSA6G046990|CSA5G001000|CSA2G002790|CSA6G034270|CSA6G051000|CSA6G002550|CSA7G001960|CSA3G032360|CSA5G039260|CSA1G015150|CSA3G018380|CSA2G012470|CSA2G011060|CSA5G030340|CSA5G005450|CSA6G007430|CSA3G003150|CSA5G026230|CSA2G025380|CSA1G006340|CSA6G002760|CSA5G038460|CSA4G013280|CSA1G003930|CSA5G023800|CSA5G030080|CSA5G032570|CSA3G035460|CSA5G008790|CSA2G011490|CSA…
44464	3.5101e-11	1.8273e-10	44	3973	0.0110748	63	13522	cell part	CSA1G001480|CSA6G021530|CSA3G022680|CSA6G046990|CSA5G001000|CSA2G002790|CSA6G034270|CSA6G051000|CSA6G002550|CSA7G001960|CSA3G032360|CSA5G039260|CSA1G015150|CSA3G018380|CSA2G012470|CSA2G011060|CSA5G030340|CSA5G005450|CSA6G007430|CSA3G003150|CSA5G026230|CSA2G025380|CSA1G006340|CSA6G002760|CSA5G038460|CSA4G013280|CSA1G003930|CSA5G023800|CSA5G030080|CSA5G032570|CSA3G035460|CSA5G008790|CSA2G011490|CSA…
9987	7.9491e-10	4.02e-09	48	5153	0.00931496	63	13522	cellular process	CSA6G021530|CSA3G022680|CSA3G027210|CSA6G046990|CSA5G001000|CSA3G026840|CSA2G002790|CSA6G034270|CSA6G051000|CSA6G002550|CSA7G001960|CSA3G032360|CSA5G039260|CSA1G015150|CSA1G005920|CSA3G018380|CSAUNG100750|CSA2G012470|CSA2G011060|CSA5G030340|CSA5G005450|CSA6G007430|CSA1G045550|CSA3G003150|CSA5G026230|CSA6G002760|CSA5G038460|CSA5G005530|CSA4G013280|CSA1G003930|CSA5G035090|CSA5G023800|CSA5G030080|CS…
8152	8.0762e-07	3.9708e-06	46	5737	0.00801813	63	13522	metabolic process	CSA6G021530|CSA3G022680|CSA3G027210|CSA6G046990|CSA5G001000|CSA6G034270|CSA6G051000|CSA6G002550|CSA7G001960|CSA3G017450|CSA3G032360|CSA5G039260|CSA1G015150|CSA1G005920|CSA3G018380|CSAUNG100750|CSA2G012470|CSA2G011060|CSA5G030340|CSA5G005450|CSA6G007430|CSA1G045550|CSA3G003150|CSA5G026230|CSA6G002760|CSA5G038460|CSA4G013280|CSA1G003930|CSA5G035090|CSA5G023800|CSA5G030080|CSA5G032570|CSA3G035460|CS…
15934	4.2389e-06	2.0278e-05	4	24	0.166667	63	13522	large ribosomal subunit	CSA3G022680|CSA2G011490|CSA5G030340|CSA1G014820
44446	3.1798e-05	0.00014431	17	1230	0.0138211	63	13522	intracellular organelle part	CSA6G021530|CSA3G022680|CSA1G006340|CSA2G002790|CSA6G002760|CSA4G013280|CSA1G015150|CSA5G032570|CSA2G011490|CSA5G030340|CSA5G005450|CSA4G011790|CSA1G014820|CSA7G022360|CSA3G012600|CSA3G030910|CSA2G025380
44422	3.1798e-05	0.00014431	17	1230	0.0138211	63	13522	organelle part	CSA6G021530|CSA3G022680|CSA1G006340|CSA2G002790|CSA6G002760|CSA4G013280|CSA1G015150|CSA5G032570|CSA2G011490|CSA5G030340|CSA5G005450|CSA4G011790|CSA1G014820|CSA7G022360|CSA3G012600|CSA3G030910|CSA2G025380
19843	5.1691e-05	0.00022873	3	16	0.1875	63	13522	rRNA binding	CSA5G032570|CSA5G001000|CSA5G030080
5730	0.00022048	0.00095182	4	64	0.0625	63	13522	nucleolus	CSA1G006340|CSA2G002790|CSA4G013280|CSA2G025380
8150	0.0031127	0.013118	51	8700	0.00586207	63	13522	biological_process	CSA3G022680|CSA3G027210|CSA3G026840|CSA2G002790|CSA6G034270|CSA6G051000|CSA6G002550|CSA3G017450|CSA3G032360|CSA1G015150|CSA3G018380|CSA2G012470|CSA2G011060|CSA5G030340|CSA1G045550|CSA5G029600|CSA6G002760|CSA5G005530|CSA5G035090|CSA5G030080|CSA5G032570|CSA7G026220|CSA4G011790|CSA5G005100|CSA4G032310|CSA7G008490|CSA3G030910|CSA6G021530|CSA6G046990|CSA5G001000|CSA7G001960|CSA5G039260|CSA1G005920|CSA…
31429	0.0046591	0.019178	1	1	1	63	13522	box H/ACA snoRNP complex	CSA4G013280
1522	0.0059816	0.024063	2	25	0.08	63	13522	pseudouridine synthesis	CSA4G013280|CSA1G005920
33819	0.0092968	0.035772	1	2	0.5	63	13522	lipoyl(octanoyl) transferase activity	CSA5G035090
9249	0.0092968	0.035772	1	2	0.5	63	13522	protein lipoylation	CSA5G035090

## Sheet: GO_ud
Table 3b The GO enrichment analysis of up-down genes
GO-ID	p-value	corr p-value	x	n	ratio	X	N	Description	Genes in test set
502	1.0307e-24	1.3502e-21	23	25	0.92	972	13522	proteasome complex	CSA4G025500|CSA5G037190|CSA3G000690|CSA2G031230|CSA7G034340|CSA2G028900|CSA4G006830|CSA6G021700|CSA6G006240|CSA6G032330|CSA3G013100|CSA2G011480|CSA6G031560|CSA3G009670|CSA4G032560|CSA6G034220|CSA7G001120|CSA7G025230|CSA6G047290|CSA5G030400|CSA4G031710|CSA1G046270|CSA7G003090
70003	3.2054e-20	1.0498e-17	17	17	1	972	13522	threonine-type peptidase activity	CSA4G025500|CSA5G037190|CSA3G000690|CSA2G031230|CSA7G034340|CSA2G028900|CSA6G021700|CSA6G032330|CSA3G013100|CSA3G009670|CSA4G032560|CSA6G034220|CSA7G025230|CSA6G047290|CSA5G030400|CSA4G031710|CSA1G046270
4298	3.2054e-20	1.0498e-17	17	17	1	972	13522	threonine-type endopeptidase activity	CSA4G025500|CSA5G037190|CSA3G000690|CSA2G031230|CSA7G034340|CSA2G028900|CSA6G021700|CSA6G032330|CSA3G013100|CSA3G009670|CSA4G032560|CSA6G034220|CSA7G025230|CSA6G047290|CSA5G030400|CSA4G031710|CSA1G046270
5839	3.2054e-20	1.0498e-17	17	17	1	972	13522	proteasome core complex	CSA4G025500|CSA5G037190|CSA3G000690|CSA2G031230|CSA7G034340|CSA2G028900|CSA6G021700|CSA6G032330|CSA3G013100|CSA3G009670|CSA4G032560|CSA6G034220|CSA7G025230|CSA6G047290|CSA5G030400|CSA4G031710|CSA1G046270
32559	1.057e-13	2.7694e-11	192	1601	0.119925	972	13522	adenyl ribonucleotide binding	CSA4G000770|CSA2G029630|CSA3G044190|CSA6G047100|CSA1G034300|CSA4G037780|CSA4G005820|CSA6G013170|CSA6G036600|CSA3G012590|CSA5G013320|CSA7G006000|CSA3G005790|CSA7G007170|CSA4G025040|CSA2G005270|CSAUNG110800|CSA3G002160|CSA3G034700|CSA3G048040|CSA5G024070|CSA2G001350|CSA6G042580|CSA5G027900|CSA7G018610|CSA1G031560|CSA2G009630|CSA7G035130|CSA7G001850|CSA7G034680|CSA7G035010|CSA5G035130|CSA3G041800|CS…
1883	4.4908e-13	6.5367e-11	196	1670	0.117365	972	13522	purine nucleoside binding	CSA6G047100|CSA1G034300|CSA4G037780|CSA4G005820|CSA4G035350|CSA3G005790|CSA7G007170|CSA2G005270|CSAUNG110800|CSA3G002160|CSA3G048040|CSA5G024070|CSA2G001350|CSA6G042580|CSA5G027900|CSA7G018610|CSA2G009630|CSA7G001850|CSA7G034680|CSA3G021800|CSA5G034550|CSA5G005540|CSA6G001360|CSA2G009640|CSA3G046410|CSA2G001360|CSA5G020120|CSA6G042310|CSA7G024760|CSA5G039660|CSA5G014710|CSA5G031370|CSA4G034000|CS…
1882	3.9478e-13	6.5367e-11	197	1679	0.117332	972	13522	nucleoside binding	CSA6G047100|CSA1G034300|CSA4G037780|CSA4G005820|CSA4G035350|CSA3G005790|CSA7G007170|CSA2G005270|CSAUNG110800|CSA3G002160|CSA3G048040|CSA5G024070|CSA2G001350|CSA6G042580|CSA5G027900|CSA7G018610|CSA2G009630|CSA7G001850|CSA7G034680|CSA3G021800|CSA5G034550|CSA5G005540|CSA6G001360|CSA2G009640|CSA3G046410|CSA2G001360|CSA5G020120|CSA6G042310|CSA7G024760|CSA5G039660|CSA5G014710|CSA5G031370|CSA4G034000|CS…
5524	3.7022e-13	6.5367e-11	184	1533	0.120026	972	13522	ATP binding	CSA4G000770|CSA2G029630|CSA3G044190|CSA6G047100|CSA1G034300|CSA4G037780|CSA4G005820|CSA6G013170|CSA6G036600|CSA3G012590|CSA5G013320|CSA7G006000|CSA3G005790|CSA7G007170|CSA4G025040|CSAUNG110800|CSA3G002160|CSA3G034700|CSA3G048040|CSA5G024070|CSA2G001350|CSA6G042580|CSA5G027900|CSA7G018610|CSA1G031560|CSA2G009630|CSA7G035130|CSA7G001850|CSA7G034680|CSA7G035010|CSA5G035130|CSA3G041800|CSA3G021800|CS…
30554	4.4908e-13	6.5367e-11	196	1670	0.117365	972	13522	adenyl nucleotide binding	CSA6G047100|CSA1G034300|CSA4G037780|CSA4G005820|CSA4G035350|CSA3G005790|CSA7G007170|CSA2G005270|CSAUNG110800|CSA3G002160|CSA3G048040|CSA5G024070|CSA2G001350|CSA6G042580|CSA5G027900|CSA7G018610|CSA2G009630|CSA7G001850|CSA7G034680|CSA3G021800|CSA5G034550|CSA5G005540|CSA6G001360|CSA2G009640|CSA3G046410|CSA2G001360|CSA5G020120|CSA6G042310|CSA7G024760|CSA5G039660|CSA5G014710|CSA5G031370|CSA4G034000|CS…
32553	2.8981e-12	3.4513e-10	204	1794	0.113712	972	13522	ribonucleotide binding	CSA6G047100|CSA1G034300|CSA4G037780|CSA4G005820|CSA7G028550|CSA3G005790|CSA7G007170|CSA2G005270|CSAUNG110800|CSA3G002160|CSA3G048040|CSA5G024070|CSA2G001350|CSA6G042580|CSA5G027900|CSA7G018610|CSA2G009630|CSA7G001850|CSA7G034680|CSA3G021800|CSA5G034550|CSA5G005540|CSA6G001360|CSA2G009640|CSA3G046410|CSA2G001360|CSA5G025930|CSA5G020120|CSA6G042310|CSA7G024760|CSA5G039660|CSA5G014710|CSA5G031370|CS…
32555	2.8981e-12	3.4513e-10	204	1794	0.113712	972	13522	purine ribonucleotide binding	CSA6G047100|CSA1G034300|CSA4G037780|CSA4G005820|CSA7G028550|CSA3G005790|CSA7G007170|CSA2G005270|CSAUNG110800|CSA3G002160|CSA3G048040|CSA5G024070|CSA2G001350|CSA6G042580|CSA5G027900|CSA7G018610|CSA2G009630|CSA7G001850|CSA7G034680|CSA3G021800|CSA5G034550|CSA5G005540|CSA6G001360|CSA2G009640|CSA3G046410|CSA2G001360|CSA5G025930|CSA5G020120|CSA6G042310|CSA7G024760|CSA5G039660|CSA5G014710|CSA5G031370|CS…
30163	5.4215e-12	5.9185e-10	28	87	0.321839	972	13522	protein catabolic process	CSA3G000690|CSA3G028620|CSA2G031230|CSA2G028900|CSA6G013170|CSA3G013100|CSA3G009670|CSA4G032560|CSA6G034220|CSA2G029040|CSA6G047290|CSA5G030400|CSA7G034900|CSA4G031710|CSA7G031810|CSA4G025500|CSA5G037190|CSA2G006720|CSA1G029620|CSA7G034340|CSA6G021700|CSA6G032330|CSA5G034230|CSA2G029050|CSA7G025230|CSA2G008010|CSA1G046270|CSA3G002090
17076	6.6164e-12	6.6673e-10	209	1867	0.111944	972	13522	purine nucleotide binding	CSA6G047100|CSA1G034300|CSA4G037780|CSA4G005820|CSA4G035350|CSA7G028550|CSA3G005790|CSA7G007170|CSA2G005270|CSAUNG110800|CSA3G002160|CSA3G048040|CSA5G024070|CSA2G001350|CSA6G042580|CSA5G027900|CSA7G018610|CSA2G009630|CSA7G001850|CSA7G034680|CSA3G021800|CSA5G034550|CSA5G005540|CSA6G001360|CSA2G009640|CSA3G046410|CSA2G001360|CSA5G025930|CSA5G020120|CSA6G042310|CSA7G024760|CSA5G039660|CSA5G014710|CS…
166	3.7448e-11	3.504e-09	219	2018	0.108523	972	13522	nucleotide binding	CSA6G047100|CSA1G034300|CSA4G037780|CSA4G005820|CSA2G033050|CSA4G035350|CSA7G028550|CSA3G005790|CSA7G007170|CSA2G005270|CSAUNG110800|CSA3G002160|CSA3G048040|CSA5G024070|CSA2G001350|CSA6G042580|CSA5G027900|CSA7G018610|CSA3G005530|CSA2G009630|CSA7G001850|CSA7G034680|CSA3G021800|CSA5G034550|CSA5G005540|CSA6G001360|CSA2G009640|CSA3G046410|CSA6G046030|CSA2G001360|CSA5G025930|CSA5G020120|CSA6G042310|CS…
6468	8.3313e-11	7.276e-09	111	833	0.133253	972	13522	protein amino acid phosphorylation	CSA3G044190|CSA6G047100|CSA1G034300|CSA4G037780|CSA6G036600|CSA7G006000|CSA3G005790|CSA7G007170|CSA4G025040|CSA3G002160|CSA3G034700|CSA3G048040|CSA2G001350|CSA6G042580|CSA5G027900|CSA7G035130|CSA7G001850|CSA7G035010|CSA5G035130|CSA5G034550|CSA1G039840|CSA6G001360|CSA3G045960|CSA3G046410|CSA7G027070|CSA3G000230|CSA2G001360|CSA3G031210|CSA6G042310|CSA6G051540|CSA6G041620|CSA7G035140|CSA5G014710|CSA…
4672	2.4029e-10	1.9674e-08	112	858	0.130536	972	13522	protein kinase activity	CSA3G044190|CSA6G047100|CSA1G034300|CSA4G037780|CSA6G036600|CSA7G006000|CSA3G005790|CSA7G007170|CSA4G025040|CSA3G002160|CSA3G034700|CSA3G048040|CSA2G001350|CSA6G042580|CSA5G027900|CSA7G035130|CSA7G001850|CSA7G035010|CSA5G035130|CSA5G034550|CSA1G039840|CSA6G001360|CSA3G045960|CSA3G046410|CSA7G027070|CSA3G000230|CSA2G001360|CSA3G031210|CSA6G042310|CSA6G051540|CSA6G041620|CSA7G035140|CSA5G014710|CSA…
19773	6.94e-10	5.3479e-08	8	8	1	972	13522	proteasome core complex, alpha-subunit complex	CSA4G025500|CSA4G032560|CSA3G000690|CSA7G034340|CSA2G028900|CSA6G047290|CSA4G031710|CSA1G046270
16740	9.2699e-10	6.7464e-08	212	2005	0.105736	972	13522	transferase activity	CSA2G034700|CSA6G047100|CSA3G048830|CSA1G034300|CSA4G027850|CSA4G037780|CSA7G008380|CSA3G005790|CSA7G007170|CSA3G002160|CSA5G008380|CSA3G048040|CSA5G024070|CSA2G001350|CSA6G042580|CSA5G027900|CSA2G030570|CSA7G001850|CSA5G031040|CSA5G034550|CSA5G035760|CSA6G001360|CSA3G046410|CSA2G001360|CSA2G034720|CSA6G042310|CSA3G036070|CSA1G031130|CSA3G013150|CSA5G014710|CSA5G031370|CSA3G033470|CSA7G004200|CSA…
16773	3.873e-09	2.6703e-07	117	953	0.12277	972	13522	phosphotransferase activity, alcohol group as acceptor	CSA3G044190|CSA6G047100|CSA1G034300|CSA4G037780|CSA6G036600|CSA7G006000|CSA3G005790|CSA7G007170|CSA4G025040|CSA3G002160|CSA3G034700|CSA3G048040|CSA2G001350|CSA6G042580|CSA5G027900|CSA7G035130|CSA7G001850|CSA7G035010|CSA5G035130|CSA5G034550|CSA1G039840|CSA6G001360|CSA3G045960|CSA3G046410|CSA7G027070|CSA3G000230|CSA2G001360|CSA3G031210|CSA6G042310|CSA6G051540|CSA6G041620|CSA7G035140|CSA5G014710|CSA…
16772	9.7162e-09	6.3641e-07	133	1144	0.116259	972	13522	transferase activity, transferring phosphorus-containing groups	CSA3G044190|CSA6G047100|CSA5G027970|CSA1G034300|CSA3G039160|CSA4G037780|CSA6G036600|CSA3G012590|CSA5G013320|CSA6G035750|CSA7G006000|CSA3G005790|CSA7G007170|CSA4G025040|CSA3G002160|CSA3G034700|CSA3G048040|CSA2G001350|CSA6G042580|CSA5G027900|CSA7G035130|CSA7G001850|CSA7G035010|CSA5G035130|CSA5G034550|CSA1G039840|CSA6G001360|CSA3G045960|CSA3G046410|CSA7G027070|CSA3G000230|CSA2G001360|CSA3G031210|CSA…
16301	1.1038e-08	6.8856e-07	120	1003	0.119641	972	13522	kinase activity	CSA3G044190|CSA6G047100|CSA1G034300|CSA4G037780|CSA6G036600|CSA3G012590|CSA5G013320|CSA7G006000|CSA3G005790|CSA7G007170|CSA4G025040|CSA3G002160|CSA3G034700|CSA3G048040|CSA2G001350|CSA6G042580|CSA5G027900|CSA7G035130|CSA7G001850|CSA7G035010|CSA5G035130|CSA5G034550|CSA1G039840|CSA6G001360|CSA3G045960|CSA3G046410|CSA7G027070|CSA3G000230|CSA2G001360|CSA3G031210|CSA6G042310|CSA6G051540|CSA6G041620|CSA…
6793	2.5693e-08	1.4634e-06	125	1073	0.116496	972	13522	phosphorus metabolic process	CSA3G044190|CSA6G047100|CSA1G034300|CSA4G037780|CSA7G007970|CSA6G036600|CSA7G006000|CSA3G005790|CSA7G007170|CSA4G025040|CSA3G002160|CSA3G034700|CSA3G048040|CSA2G001350|CSA6G042580|CSA5G027900|CSA7G035130|CSA7G001850|CSA1G036330|CSA7G035010|CSA5G035130|CSA6G022710|CSA5G034550|CSA1G039840|CSA6G001360|CSA3G045960|CSA3G046410|CSA7G027070|CSA3G000230|CSA2G001360|CSA3G031210|CSA6G042310|CSA3G002010|CSA…
6796	2.5693e-08	1.4634e-06	125	1073	0.116496	972	13522	phosphate metabolic process	CSA3G044190|CSA6G047100|CSA1G034300|CSA4G037780|CSA7G007970|CSA6G036600|CSA7G006000|CSA3G005790|CSA7G007170|CSA4G025040|CSA3G002160|CSA3G034700|CSA3G048040|CSA2G001350|CSA6G042580|CSA5G027900|CSA7G035130|CSA7G001850|CSA1G036330|CSA7G035010|CSA5G035130|CSA6G022710|CSA5G034550|CSA1G039840|CSA6G001360|CSA3G045960|CSA3G046410|CSA7G027070|CSA3G000230|CSA2G001360|CSA3G031210|CSA6G042310|CSA3G002010|CSA…
43687	2.7398e-08	1.4955e-06	131	1141	0.114812	972	13522	post-translational protein modification	CSA3G044190|CSA6G047100|CSA1G034300|CSA4G037780|CSA7G007970|CSA6G036600|CSA7G006000|CSA3G005790|CSA7G007170|CSA4G025040|CSA3G002160|CSA3G034700|CSA3G048040|CSA2G001350|CSA6G042580|CSA5G027900|CSA7G035130|CSA7G001850|CSA1G036330|CSA7G035010|CSA5G035130|CSA1G033060|CSA6G022710|CSA5G034550|CSA1G039840|CSA6G001360|CSA3G045960|CSA3G046410|CSA6G049540|CSA7G027070|CSA3G000230|CSA2G001360|CSA3G002250|CSA…
9057	3.0512e-08	1.5988e-06	31	145	0.213793	972	13522	macromolecule catabolic process	CSA3G000690|CSA3G028620|CSA6G047720|CSA2G031230|CSA2G028900|CSA1G036780|CSA3G000410|CSA6G013170|CSA3G013100|CSA3G009670|CSA4G032560|CSA6G034220|CSA2G029040|CSA6G047290|CSA5G030400|CSA7G034900|CSA4G031710|CSA7G031810|CSA4G025500|CSA5G037190|CSA2G006720|CSA1G029620|CSA7G034340|CSA6G021700|CSA6G032330|CSA5G034230|CSA2G029050|CSA7G025230|CSA2G008010|CSA1G046270|CSA3G002090
16310	9.4162e-08	4.7443e-06	113	964	0.11722	972	13522	phosphorylation	CSA3G044190|CSA6G047100|CSA1G034300|CSA4G037780|CSA6G036600|CSA7G006000|CSA3G005790|CSA7G007170|CSA4G025040|CSA3G002160|CSA3G034700|CSA3G048040|CSA2G001350|CSA6G042580|CSA5G027900|CSA7G035130|CSA7G001850|CSA7G035010|CSA5G035130|CSA5G034550|CSA1G039840|CSA6G001360|CSA3G045960|CSA3G046410|CSA7G027070|CSA3G000230|CSA2G001360|CSA3G031210|CSA6G042310|CSA6G051540|CSA6G041620|CSA7G035140|CSA5G014710|CSA…
51603	2.544e-07	1.1902e-05	20	76	0.263158	972	13522	proteolysis involved in cellular protein catabolic process	CSA4G025500|CSA5G037190|CSA3G000690|CSA2G031230|CSA7G034340|CSA2G028900|CSA6G021700|CSA6G032330|CSA3G013100|CSA5G034230|CSA3G009670|CSA4G032560|CSA6G034220|CSA7G025230|CSA6G047290|CSA5G030400|CSA7G034900|CSA4G031710|CSA1G046270|CSA3G002090
44257	2.544e-07	1.1902e-05	20	76	0.263158	972	13522	cellular protein catabolic process	CSA4G025500|CSA5G037190|CSA3G000690|CSA2G031230|CSA7G034340|CSA2G028900|CSA6G021700|CSA6G032330|CSA3G013100|CSA5G034230|CSA3G009670|CSA4G032560|CSA6G034220|CSA7G025230|CSA6G047290|CSA5G030400|CSA7G034900|CSA4G031710|CSA1G046270|CSA3G002090
6464	5.0833e-07	2.2963e-05	135	1246	0.108347	972	13522	protein modification process	CSA3G044190|CSA6G047100|CSA1G034300|CSA4G037780|CSA7G007970|CSA6G036600|CSA7G006000|CSA3G005790|CSA7G007170|CSA4G025040|CSA3G002160|CSA3G034700|CSA3G048040|CSA2G001350|CSA6G042580|CSA5G027900|CSA7G035130|CSA7G001850|CSA1G036330|CSA7G035010|CSA5G035130|CSA1G033060|CSA6G022710|CSA5G031040|CSA5G034550|CSA1G039840|CSA6G001360|CSA3G045960|CSA3G046410|CSA6G049540|CSA7G027070|CSA3G000230|CSA2G001360|CSA…
3824	6.0355e-07	2.6355e-05	487	5760	0.0845486	972	13522	catalytic activity	CSA2G034700|CSA4G023250|CSA1G034300|CSA4G027850|CSA6G045840|CSA4G037780|CSA4G005820|CSA7G007970|CSA4G035350|CSA7G028550|CSA7G028670|CSA6G032400|CSA1G011780|CSA3G005790|CSAUNG110800|CSA3G002160|CSA5G008380|CSA3G027340|CSA3G048040|CSA1G007050|CSA6G042580|CSA5G003910|CSA5G027900|CSA5G020270|CSA7G018610|CSA3G005530|CSA2G009630|CSA2G030570|CSA6G022710|CSA3G021800|CSA5G031040|CSA5G034550|CSA5G035760|CS…
90047	1.901e-06	7.3243e-05	5	5	1	972	13522	positive regulation of transcription regulator activity	CSA2G003870|CSA2G003860|CSA5G036860|CSA3G040160|CSA4G029660
51091	1.901e-06	7.3243e-05	5	5	1	972	13522	positive regulation of transcription factor activity	CSA2G003870|CSA2G003860|CSA5G036860|CSA3G040160|CSA4G029660
43388	1.901e-06	7.3243e-05	5	5	1	972	13522	positive regulation of DNA binding	CSA2G003870|CSA2G003860|CSA5G036860|CSA3G040160|CSA4G029660
51099	1.901e-06	7.3243e-05	5	5	1	972	13522	positive regulation of binding	CSA2G003870|CSA2G003860|CSA5G036860|CSA3G040160|CSA4G029660
90046	3.3559e-06	0.00011569	6	8	0.75	972	13522	regulation of transcription regulator activity	CSA2G003870|CSA2G003860|CSA5G036860|CSA3G040160|CSA3G004570|CSA4G029660
51090	3.3559e-06	0.00011569	6	8	0.75	972	13522	regulation of transcription factor activity	CSA2G003870|CSA2G003860|CSA5G036860|CSA3G040160|CSA3G004570|CSA4G029660
51101	3.3559e-06	0.00011569	6	8	0.75	972	13522	regulation of DNA binding	CSA2G003870|CSA2G003860|CSA5G036860|CSA3G040160|CSA3G004570|CSA4G029660
51098	3.3559e-06	0.00011569	6	8	0.75	972	13522	regulation of binding	CSA2G003870|CSA2G003860|CSA5G036860|CSA3G040160|CSA3G004570|CSA4G029660
43412	3.5452e-06	0.00011908	139	1338	0.103886	972	13522	macromolecule modification	CSA3G044190|CSA6G047100|CSA1G034300|CSA4G037780|CSA7G007970|CSA6G036600|CSA7G006000|CSA3G005790|CSA7G007170|CSA4G025040|CSA3G002160|CSA3G034700|CSA5G008380|CSA3G048040|CSA2G001350|CSA6G042580|CSA5G027900|CSA7G035130|CSA7G001850|CSA1G036330|CSA7G035010|CSA5G035130|CSA1G033060|CSA6G022710|CSA5G031040|CSA5G034550|CSA1G039840|CSA6G001360|CSA3G045960|CSA3G046410|CSA6G049540|CSA7G027070|CSA3G000230|CSA…
44267	6.1539e-06	0.00020154	172	1748	0.0983982	972	13522	cellular protein metabolic process	CSA2G029630|CSA3G044190|CSA6G047100|CSA1G034300|CSA4G037780|CSA7G007970|CSA6G036600|CSA7G006000|CSA3G005790|CSA7G007170|CSA4G025040|CSAUNG110800|CSA3G002160|CSA3G034700|CSA4G031710|CSA3G048040|CSA5G024070|CSA2G001350|CSA6G042580|CSA5G027900|CSA2G001230|CSA7G035130|CSA7G001850|CSA1G036330|CSA7G035010|CSA5G035130|CSA1G033060|CSA6G022710|CSA5G031040|CSA5G034550|CSA1G039840|CSA6G001360|CSA3G045960|CS…
19538	1.2719e-05	0.00040639	198	2090	0.0947368	972	13522	protein metabolic process	CSA6G047100|CSA1G034300|CSA4G037780|CSA7G007970|CSA3G005790|CSA7G007170|CSAUNG110800|CSA3G002160|CSA3G048040|CSA5G024070|CSA2G001350|CSA6G042580|CSA5G003910|CSA5G027900|CSA2G001230|CSA7G001850|CSA6G022710|CSA5G031040|CSA5G034550|CSA6G001360|CSA3G046410|CSA6G049540|CSA2G001360|CSA3G002250|CSA6G042310|CSA7G024760|CSA5G036030|CSA1G004910|CSA5G014710|CSA5G031370|CSA3G033470|CSA7G004200|CSA5G006540|CS…
4175	4.1257e-05	0.0012868	34	229	0.148472	972	13522	endopeptidase activity	CSA3G002750|CSA1G006550|CSA3G000690|CSA3G000570|CSA2G031230|CSA2G028900|CSA4G036350|CSA3G013100|CSA3G009670|CSA6G001270|CSA3G013680|CSA4G032560|CSA6G034220|CSA4G028130|CSA6G047290|CSA5G026890|CSA5G030400|CSA4G031710|CSA6G047450|CSA4G025500|CSA3G047430|CSA5G037190|CSA7G034340|CSA6G021700|CSA6G032330|CSA7G028220|CSA5G001140|CSA5G033500|CSA7G025230|CSA4G030510|CSA6G016700|CSA1G046270|CSA6G040190|CSA…
8150	5.3181e-05	0.0016202	681	8700	0.0782759	972	13522	biological_process	CSA6G021510|CSA2G034700|CSA4G023250|CSA3G004450|CSA1G034300|CSA4G027850|CSA6G045840|CSA4G037780|CSA4G010180|CSA4G005820|CSA7G007970|CSA6G006240|CSA4G035350|CSA7G028550|CSA7G028670|CSA6G032400|CSA1G011780|CSA3G005790|CSA2G005270|CSAUNG110800|CSA3G002160|CSA5G008380|CSA3G027340|CSA3G048040|CSA1G007050|CSA4G026510|CSA6G042580|CSA5G003910|CSA5G027900|CSA5G020270|CSA7G018610|CSA3G005530|CSA2G009630|CS…
3700	5.5902e-05	0.0016644	53	425	0.124706	972	13522	transcription factor activity	CSA2G030300|CSA1G007320|CSA2G025510|CSA6G003960|CSA5G034270|CSA7G031430|CSA2G017720|CSA4G006480|CSA2G012870|CSA7G005750|CSA7G027860|CSA2G035630|CSA3G007490|CSA6G044440|CSA3G002460|CSA6G050320|CSA6G050560|CSA3G021840|CSA1G004720|CSA2G031180|CSA6G013210|CSA5G004890|CSA3G033700|CSA7G025370|CSA3G042290|CSA3G008170|CSA6G045980|CSA6G043240|CSA3G004830|CSA4G000990|CSA2G032460|CSA3G015290|CSA3G033350|CSA…
44265	7.5796e-05	0.0021585	20	108	0.185185	972	13522	cellular macromolecule catabolic process	CSA4G025500|CSA5G037190|CSA3G000690|CSA2G031230|CSA7G034340|CSA2G028900|CSA6G021700|CSA6G032330|CSA3G013100|CSA5G034230|CSA3G009670|CSA4G032560|CSA6G034220|CSA7G025230|CSA6G047290|CSA5G030400|CSA7G034900|CSA4G031710|CSA1G046270|CSA3G002090
5509	7.5329e-05	0.0021585	31	207	0.149758	972	13522	calcium ion binding	CSA4G027710|CSA3G005500|CSA6G047100|CSA5G038130|CSA1G000650|CSA4G037780|CSA1G002910|CSA3G008040|CSA7G007850|CSA3G040820|CSA6G053070|CSA1G011780|CSA7G006180|CSA5G024070|CSA3G004820|CSA4G002420|CSA1G009950|CSA1G005550|CSA3G032970|CSA4G006200|CSA3G015240|CSA5G035130|CSA5G005810|CSA2G013350|CSA3G033020|CSA1G011690|CSA3G041300|CSA3G044850|CSA4G011890|CSA3G003480|CSA3G012800
45449	9.3797e-05	0.0025076	95	904	0.105088	972	13522	regulation of transcription	CSA2G030300|CSA6G021510|CSA1G007320|CSA3G028740|CSA2G025510|CSA3G004450|CSA6G041640|CSA6G007920|CSA6G003960|CSA5G034270|CSA7G031430|CSA2G017720|CSA4G006480|CSA1G039310|CSA2G019740|CSA2G012870|CSA7G005750|CSA7G027860|CSA2G035630|CSA3G044540|CSA3G007490|CSA6G044440|CSA6G044680|CSA3G002460|CSA7G021760|CSA2G021020|CSA1G026650|CSA6G050320|CSA2G032310|CSA6G050560|CSA3G021840|CSA1G004720|CSA2G031180|CSA…
60255	9.1952e-05	0.0025076	107	1044	0.10249	972	13522	regulation of macromolecule metabolic process	CSA6G021510|CSA1G007320|CSA3G004450|CSA6G041640|CSA1G034300|CSA5G034270|CSA6G006240|CSA7G031430|CSA7G028550|CSA4G006480|CSA1G039310|CSA2G012870|CSA7G027860|CSA2G035630|CSA7G003090|CSA7G021760|CSA1G026650|CSA1G004720|CSA5G027070|CSA6G013210|CSA5G033980|CSA7G026420|CSA5G032930|CSA3G004570|CSA3G049360|CSA3G042290|CSA6G043240|CSA3G004830|CSA4G000990|CSA5G025930|CSA6G050450|CSA3G015290|CSA4G034490|CSA…
9056	9.34e-05	0.0025076	54	444	0.121622	972	13522	catabolic process	CSA3G049440|CSA3G000690|CSA3G028620|CSA2G031230|CSA2G028900|CSA6G039680|CSA3G000410|CSA6G013170|CSA3G009670|CSA6G039710|CSA4G032560|CSA6G034220|CSA2G029040|CSA7G034900|CSA4G031710|CSA4G025500|CSA5G037190|CSA2G006720|CSA2G025820|CSA6G021700|CSA5G029170|CSA5G034230|CSA6G038810|CSA3G011970|CSA7G035320|CSA6G039700|CSA1G040750|CSA3G003480|CSA2G002170|CSA1G008830|CSA1G009520|CSA6G047720|CSA1G036780|CSA…
43565	0.0001089	0.0028532	29	192	0.151042	972	13522	sequence-specific DNA binding	CSA6G043240|CSA2G025510|CSA2G032460|CSA3G015290|CSA7G031430|CSA2G017720|CSA4G006480|CSA3G033350|CSA7G005750|CSA7G027860|CSA6G032100|CSA2G035630|CSA4G003030|CSA6G015300|CSA3G036820|CSA6G042280|CSA6G044440|CSA6G043450|CSA6G050100|CSA1G004720|CSA5G011080|CSA3G016920|CSA3G033000|CSA4G004890|CSA3G040130|CSA3G033700|CSA7G025370|CSA3G042290|CSA3G008170
42176	0.00012513	0.0032141	4	5	0.8	972	13522	regulation of protein catabolic process	CSA6G006240|CSA2G011480|CSA7G001120|CSA7G003090
80090	0.0001488	0.0037487	106	1045	0.101435	972	13522	regulation of primary metabolic process	CSA6G021510|CSA1G007320|CSA3G004450|CSA6G041640|CSA5G034270|CSA6G006240|CSA7G031430|CSA7G028550|CSA4G006480|CSA1G039310|CSA2G012870|CSA7G027860|CSA2G035630|CSA7G003090|CSA7G021760|CSA1G026650|CSA1G004720|CSA5G027070|CSA6G013210|CSA5G033980|CSA7G026420|CSA5G032930|CSA3G004570|CSA3G049360|CSA3G042290|CSA6G043240|CSA3G004830|CSA4G000990|CSA5G025930|CSA6G050450|CSA3G015290|CSA4G034490|CSA4G013420|CSA…
16841	0.0001527	0.0037743	7	18	0.388889	972	13522	ammonia-lyase activity	CSA6G040240|CSA6G039710|CSA6G039700|CSA6G039720|CSA1G040750|CSA6G039680|CSA6G039690
30528	0.00015919	0.0038617	55	464	0.118534	972	13522	transcription regulator activity	CSA2G030300|CSA1G007320|CSA2G025510|CSA6G003960|CSA5G034270|CSA7G031430|CSA2G017720|CSA4G006480|CSA2G012870|CSA7G005750|CSA7G027860|CSA2G035630|CSA3G007490|CSA6G044440|CSA3G002460|CSA6G050320|CSA6G050560|CSA3G021840|CSA1G004720|CSA2G031180|CSA6G013210|CSA5G004890|CSA3G033700|CSA7G025370|CSA3G042290|CSA3G008170|CSA6G045980|CSA6G043240|CSA3G004830|CSA4G000990|CSA6G001440|CSA2G032460|CSA3G015290|CSA…
5667	0.00020031	0.0045243	57	490	0.116327	972	13522	transcription factor complex	CSA2G030300|CSA1G007320|CSA2G025510|CSA6G003960|CSA5G034270|CSA7G031430|CSA2G017720|CSA4G006480|CSA2G012870|CSA7G005750|CSA7G027860|CSA2G035630|CSA3G007490|CSA6G044440|CSA3G002460|CSA6G050320|CSA6G050560|CSA3G021840|CSA1G004720|CSA2G031180|CSA2G029190|CSA6G013210|CSA5G004890|CSA3G004570|CSA3G033700|CSA7G025370|CSA3G042290|CSA3G008170|CSA6G045980|CSA6G043240|CSA3G004830|CSA4G000990|CSA6G001440|CSA…
10556	0.00019294	0.0045243	100	981	0.101937	972	13522	regulation of macromolecule biosynthetic process	CSA6G021510|CSA1G007320|CSA3G004450|CSA6G041640|CSA5G034270|CSA7G031430|CSA7G028550|CSA4G006480|CSA1G039310|CSA2G012870|CSA7G027860|CSA2G035630|CSA7G021760|CSA1G026650|CSA1G004720|CSA5G027070|CSA6G013210|CSA5G033980|CSA7G026420|CSA5G032930|CSA3G004570|CSA3G049360|CSA3G042290|CSA6G043240|CSA3G004830|CSA4G000990|CSA5G025930|CSA6G050450|CSA3G015290|CSA4G034490|CSA4G013420|CSA3G038000|CSA3G033350|CSA…
31326	0.00020029	0.0045243	100	982	0.101833	972	13522	regulation of cellular biosynthetic process	CSA6G021510|CSA1G007320|CSA3G004450|CSA6G041640|CSA5G034270|CSA7G031430|CSA7G028550|CSA4G006480|CSA1G039310|CSA2G012870|CSA7G027860|CSA2G035630|CSA7G021760|CSA1G026650|CSA1G004720|CSA5G027070|CSA6G013210|CSA5G033980|CSA7G026420|CSA5G032930|CSA3G004570|CSA3G049360|CSA3G042290|CSA6G043240|CSA3G004830|CSA4G000990|CSA5G025930|CSA6G050450|CSA3G015290|CSA4G034490|CSA4G013420|CSA3G038000|CSA3G033350|CSA…
9889	0.00020029	0.0045243	100	982	0.101833	972	13522	regulation of biosynthetic process	CSA6G021510|CSA1G007320|CSA3G004450|CSA6G041640|CSA5G034270|CSA7G031430|CSA7G028550|CSA4G006480|CSA1G039310|CSA2G012870|CSA7G027860|CSA2G035630|CSA7G021760|CSA1G026650|CSA1G004720|CSA5G027070|CSA6G013210|CSA5G033980|CSA7G026420|CSA5G032930|CSA3G004570|CSA3G049360|CSA3G042290|CSA6G043240|CSA3G004830|CSA4G000990|CSA5G025930|CSA6G050450|CSA3G015290|CSA4G034490|CSA4G013420|CSA3G038000|CSA3G033350|CSA…
6559	0.00024688	0.0054816	6	14	0.428571	972	13522	L-phenylalanine catabolic process	CSA6G039710|CSA6G039700|CSA6G039720|CSA1G040750|CSA6G039680|CSA6G039690
10468	0.00025134	0.0054876	101	1000	0.101	972	13522	regulation of gene expression	CSA6G021510|CSA1G007320|CSA3G004450|CSA6G041640|CSA1G034300|CSA5G034270|CSA7G031430|CSA7G028550|CSA4G006480|CSA1G039310|CSA2G012870|CSA7G027860|CSA2G035630|CSA7G021760|CSA1G026650|CSA1G004720|CSA5G027070|CSA6G013210|CSA5G033980|CSA7G026420|CSA5G032930|CSA3G004570|CSA3G049360|CSA3G042290|CSA6G043240|CSA3G004830|CSA4G000990|CSA5G025930|CSA6G050450|CSA3G015290|CSA4G034490|CSA4G013420|CSA3G038000|CSA…
50789	0.00036611	0.0078625	136	1435	0.0947735	972	13522	regulation of biological process	CSA6G021510|CSA1G007320|CSA3G004450|CSA6G041640|CSA1G034300|CSA5G037660|CSA5G034270|CSA6G006240|CSA7G031430|CSA7G028550|CSA4G006480|CSA1G039310|CSA2G012870|CSA7G027860|CSA2G035630|CSA2G005270|CSA7G003090|CSA7G021760|CSA1G026650|CSA1G004720|CSA5G027070|CSA6G013210|CSA5G033980|CSA7G026420|CSA5G032930|CSA2G005040|CSA3G004570|CSA3G049360|CSA3G042290|CSA6G043240|CSA4G025410|CSA3G004830|CSA1G003780|CSA…
19219	0.00040928	0.0085105	97	966	0.100414	972	13522	regulation of nucleobase, nucleoside, nucleotide and nucleic acid metabolic process	CSA6G021510|CSA1G007320|CSA3G004450|CSA6G041640|CSA5G034270|CSA7G031430|CSA4G006480|CSA1G039310|CSA2G012870|CSA7G027860|CSA2G035630|CSA7G021760|CSA1G026650|CSA1G004720|CSA5G027070|CSA6G013210|CSA5G033980|CSA7G026420|CSA5G032930|CSA3G004570|CSA3G049360|CSA3G042290|CSA6G043240|CSA3G004830|CSA4G000990|CSA6G050450|CSA3G015290|CSA4G034490|CSA4G013420|CSA3G038000|CSA3G033350|CSA4G034640|CSA7G001570|CSA…
51171	0.00040928	0.0085105	97	966	0.100414	972	13522	regulation of nitrogen compound metabolic process	CSA6G021510|CSA1G007320|CSA3G004450|CSA6G041640|CSA5G034270|CSA7G031430|CSA4G006480|CSA1G039310|CSA2G012870|CSA7G027860|CSA2G035630|CSA7G021760|CSA1G026650|CSA1G004720|CSA5G027070|CSA6G013210|CSA5G033980|CSA7G026420|CSA5G032930|CSA3G004570|CSA3G049360|CSA3G042290|CSA6G043240|CSA3G004830|CSA4G000990|CSA6G050450|CSA3G015290|CSA4G034490|CSA4G013420|CSA3G038000|CSA3G033350|CSA4G034640|CSA7G001570|CSA…
3674	0.00055494	0.011359	882	11827	0.0745751	972	13522	molecular_function	CSA6G021510|CSA2G034700|CSA1G003920|CSA1G000650|CSA4G037780|CSA7G007970|CSA4G035350|CSA7G028670|CSA6G032400|CSA1G011780|CSAUNG110800|CSA3G002160|CSA1G007050|CSA7G018610|CSA2G030570|CSA5G031040|CSA5G032130|CSA5G034550|CSA4G037760|CSA5G033460|CSA3G018960|CSA3G003480|CSA3G004570|CSA4G027710|CSA2G034720|CSA4G025770|CSA5G020120|CSA3G036190|CSA1G031130|CSA5G026900|CSA6G016180|CSA4G034490|CSA5G014710|CS…
19222	0.00065794	0.01326	107	1100	0.0972727	972	13522	regulation of metabolic process	CSA6G021510|CSA1G007320|CSA3G004450|CSA6G041640|CSA1G034300|CSA5G034270|CSA6G006240|CSA7G031430|CSA7G028550|CSA4G006480|CSA1G039310|CSA2G012870|CSA7G027860|CSA2G035630|CSA7G003090|CSA7G021760|CSA1G026650|CSA1G004720|CSA5G027070|CSA6G013210|CSA5G033980|CSA7G026420|CSA5G032930|CSA3G004570|CSA3G049360|CSA3G042290|CSA6G043240|CSA3G004830|CSA4G000990|CSA5G025930|CSA6G050450|CSA3G015290|CSA4G034490|CSA…
43248	0.00077878	0.015003	4	7	0.571429	972	13522	proteasome assembly	CSA6G031560|CSA4G033450|CSA5G039100|CSA6G038790
3950	0.00077878	0.015003	4	7	0.571429	972	13522	NAD+ ADP-ribosyltransferase activity	CSA3G048860|CSA3G001370|CSA1G008470|CSA2G030570
16840	0.00076173	0.015003	8	29	0.275862	972	13522	carbon-nitrogen lyase activity	CSA6G040240|CSA6G039710|CSA6G039700|CSA6G039720|CSA1G040750|CSA3G000390|CSA6G039680|CSA6G039690
65007	0.00084654	0.015842	142	1539	0.0922677	972	13522	biological regulation	CSA6G021510|CSA1G007320|CSA3G004450|CSA6G041640|CSA1G034300|CSA5G037660|CSA4G010180|CSA5G034270|CSA6G006240|CSA7G031430|CSA7G028550|CSA4G006480|CSA1G039310|CSA2G012870|CSA7G027860|CSA2G035630|CSA2G005270|CSA7G003090|CSA7G021760|CSA1G026650|CSA1G004720|CSA5G027070|CSA6G013210|CSA5G033980|CSA7G026420|CSA5G032930|CSA2G005040|CSA3G004570|CSA3G049360|CSA3G042290|CSA6G043240|CSA4G025410|CSA3G004830|CSA…
9074	0.00084371	0.015842	6	17	0.352941	972	13522	aromatic amino acid family catabolic process	CSA6G039710|CSA6G039700|CSA6G039720|CSA1G040750|CSA6G039680|CSA6G039690
5488	0.00087086	0.016068	613	7879	0.0778018	972	13522	binding	CSA6G021510|CSA3G004450|CSA1G034300|CSA6G045840|CSA1G003920|CSA1G000650|CSA4G037780|CSA4G005820|CSA7G007970|CSA7G007850|CSA4G035350|CSA7G028550|CSA1G011780|CSA3G005790|CSA2G005270|CSAUNG110800|CSA3G002160|CSA4G025680|CSA3G048040|CSA1G007050|CSA1G043490|CSA6G042580|CSA5G027900|CSA7G018610|CSA3G005530|CSA2G009630|CSA7G006500|CSA3G021800|CSA5G032130|CSA5G034550|CSA4G037760|CSA5G033460|CSA3G040550|CS…
31981	0.0009182	0.016706	65	612	0.106209	972	13522	nuclear lumen	CSA2G030300|CSA1G007320|CSA2G025510|CSA3G039160|CSA6G003960|CSA5G034270|CSA7G031430|CSA2G017720|CSA4G006480|CSA2G012870|CSA7G005750|CSA7G027860|CSA6G035750|CSA2G035630|CSA3G046320|CSA3G007490|CSA6G044440|CSA7G025800|CSA3G002460|CSA6G050320|CSA6G050560|CSA3G021840|CSA1G004720|CSA2G031180|CSA2G029190|CSA6G013210|CSA5G004890|CSA3G004570|CSA3G033700|CSA7G025370|CSA3G042290|CSA3G008170|CSA6G045980|CSA…
6355	0.00099663	0.017885	89	896	0.0993304	972	13522	regulation of transcription, DNA-dependent	CSA2G030300|CSA6G021510|CSA1G007320|CSA3G028740|CSA2G025510|CSA3G004450|CSA6G041640|CSA6G007920|CSA6G003960|CSA5G034270|CSA7G031430|CSA2G017720|CSA4G006480|CSA1G039310|CSA2G019740|CSA2G012870|CSA7G005750|CSA7G027860|CSA2G035630|CSA3G044540|CSA3G007490|CSA6G044440|CSA6G044680|CSA3G002460|CSA7G021760|CSA2G021020|CSA1G026650|CSA6G050320|CSA2G032310|CSA6G050560|CSA3G021840|CSA1G004720|CSA2G031180|CSA…
16757	0.0011355	0.020102	44	380	0.115789	972	13522	transferase activity, transferring glycosyl groups	CSA4G028900|CSA2G034700|CSA2G034720|CSA2G026200|CSA3G048830|CSA1G031430|CSA2G034740|CSA5G004430|CSA7G011470|CSA3G036070|CSA6G044930|CSA7G011490|CSA2G036170|CSA3G036340|CSA7G028130|CSA3G036300|CSA4G032420|CSA3G008760|CSA7G008380|CSA4G024030|CSA5G024070|CSA6G009290|CSA3G047570|CSA6G014290|CSA3G048860|CSA3G001370|CSA6G015780|CSA5G028850|CSA1G031420|CSA7G027500|CSA2G030570|CSA1G031460|CSA5G031040|CSA…
43233	0.0012789	0.022043	65	620	0.104839	972	13522	organelle lumen	CSA2G030300|CSA1G007320|CSA2G025510|CSA3G039160|CSA6G003960|CSA5G034270|CSA7G031430|CSA2G017720|CSA4G006480|CSA2G012870|CSA7G005750|CSA7G027860|CSA6G035750|CSA2G035630|CSA3G046320|CSA3G007490|CSA6G044440|CSA7G025800|CSA3G002460|CSA6G050320|CSA6G050560|CSA3G021840|CSA1G004720|CSA2G031180|CSA2G029190|CSA6G013210|CSA5G004890|CSA3G004570|CSA3G033700|CSA7G025370|CSA3G042290|CSA3G008170|CSA6G045980|CSA…
70013	0.0012789	0.022043	65	620	0.104839	972	13522	intracellular organelle lumen	CSA2G030300|CSA1G007320|CSA2G025510|CSA3G039160|CSA6G003960|CSA5G034270|CSA7G031430|CSA2G017720|CSA4G006480|CSA2G012870|CSA7G005750|CSA7G027860|CSA6G035750|CSA2G035630|CSA3G046320|CSA3G007490|CSA6G044440|CSA7G025800|CSA3G002460|CSA6G050320|CSA6G050560|CSA3G021840|CSA1G004720|CSA2G031180|CSA2G029190|CSA6G013210|CSA5G004890|CSA3G004570|CSA3G033700|CSA7G025370|CSA3G042290|CSA3G008170|CSA6G045980|CSA…
51252	0.0013067	0.022231	91	928	0.0980603	972	13522	regulation of RNA metabolic process	CSA2G030300|CSA6G021510|CSA1G007320|CSA3G028740|CSA2G025510|CSA3G004450|CSA6G041640|CSA6G007920|CSA6G003960|CSA5G034270|CSA7G031430|CSA2G017720|CSA4G006480|CSA1G039310|CSA2G019740|CSA2G012870|CSA7G005750|CSA7G027860|CSA2G035630|CSA3G044540|CSA3G007490|CSA1G028590|CSA6G044440|CSA6G044680|CSA3G002460|CSA7G021760|CSA2G021020|CSA1G026650|CSA6G050320|CSA2G032310|CSA6G050560|CSA3G021840|CSA1G004720|CSA…
10112	0.0014018	0.022955	3	4	0.75	972	13522	regulation of systemic acquired resistance	CSA1G003780|CSA5G034250|CSA7G030280
2831	0.0014018	0.022955	3	4	0.75	972	13522	regulation of response to biotic stimulus	CSA1G003780|CSA5G034250|CSA7G030280
43900	0.0014018	0.022955	3	4	0.75	972	13522	regulation of multi-organism process	CSA1G003780|CSA5G034250|CSA7G030280
31347	0.001469	0.023185	4	8	0.5	972	13522	regulation of defense response	CSA1G003780|CSA5G034250|CSA7G030280|CSA2G003910
44451	0.0014619	0.023185	59	554	0.106498	972	13522	nucleoplasm part	CSA2G030300|CSA1G007320|CSA2G025510|CSA6G003960|CSA5G034270|CSA7G031430|CSA2G017720|CSA4G006480|CSA2G012870|CSA7G005750|CSA7G027860|CSA2G035630|CSA3G046320|CSA3G007490|CSA6G044440|CSA7G025800|CSA3G002460|CSA6G050320|CSA6G050560|CSA3G021840|CSA1G004720|CSA2G031180|CSA2G029190|CSA6G013210|CSA5G004890|CSA3G004570|CSA3G033700|CSA7G025370|CSA3G042290|CSA3G008170|CSA6G045980|CSA6G043240|CSA3G004830|CSA…
5654	0.0014619	0.023185	59	554	0.106498	972	13522	nucleoplasm	CSA2G030300|CSA1G007320|CSA2G025510|CSA6G003960|CSA5G034270|CSA7G031430|CSA2G017720|CSA4G006480|CSA2G012870|CSA7G005750|CSA7G027860|CSA2G035630|CSA3G046320|CSA3G007490|CSA6G044440|CSA7G025800|CSA3G002460|CSA6G050320|CSA6G050560|CSA3G021840|CSA1G004720|CSA2G031180|CSA2G029190|CSA6G013210|CSA5G004890|CSA3G004570|CSA3G033700|CSA7G025370|CSA3G042290|CSA3G008170|CSA6G045980|CSA6G043240|CSA3G004830|CSA…
31974	0.0015635	0.024383	65	625	0.104	972	13522	membrane-enclosed lumen	CSA2G030300|CSA1G007320|CSA2G025510|CSA3G039160|CSA6G003960|CSA5G034270|CSA7G031430|CSA2G017720|CSA4G006480|CSA2G012870|CSA7G005750|CSA7G027860|CSA6G035750|CSA2G035630|CSA3G046320|CSA3G007490|CSA6G044440|CSA7G025800|CSA3G002460|CSA6G050320|CSA6G050560|CSA3G021840|CSA1G004720|CSA2G031180|CSA2G029190|CSA6G013210|CSA5G004890|CSA3G004570|CSA3G033700|CSA7G025370|CSA3G042290|CSA3G008170|CSA6G045980|CSA…
44260	0.0019178	0.029557	224	2623	0.0853984	972	13522	cellular macromolecule metabolic process	CSA2G034700|CSA6G047100|CSA3G048830|CSA1G034300|CSA4G037780|CSA7G007970|CSA3G005790|CSA7G007170|CSAUNG110800|CSA3G002160|CSA5G008380|CSA3G048040|CSA5G024070|CSA2G001350|CSA6G042580|CSA5G027900|CSA2G001230|CSA7G001850|CSA6G022710|CSA1G014490|CSA5G031040|CSA5G034550|CSA6G001360|CSA6G046270|CSA3G004570|CSA1G008250|CSA3G046410|CSA6G049540|CSA2G001360|CSA2G034720|CSA3G002250|CSA6G042310|CSA7G024760|CS…
31323	0.0019913	0.030002	102	1075	0.0948837	972	13522	regulation of cellular metabolic process	CSA6G021510|CSA1G007320|CSA3G004450|CSA6G041640|CSA5G034270|CSA7G031430|CSA7G028550|CSA4G006480|CSA1G039310|CSA2G012870|CSA7G027860|CSA2G035630|CSA7G021760|CSA1G026650|CSA1G004720|CSA5G027070|CSA6G013210|CSA5G033980|CSA7G026420|CSA5G032930|CSA3G004570|CSA3G049360|CSA3G042290|CSA6G043240|CSA3G004830|CSA4G000990|CSA5G025930|CSA6G050450|CSA3G015290|CSA4G034490|CSA4G013420|CSA3G038000|CSA3G033350|CSA…
43170	0.0019925	0.030002	254	3018	0.0841617	972	13522	macromolecule metabolic process	CSA2G034700|CSA6G047100|CSA3G048830|CSA1G034300|CSA4G037780|CSA3G000410|CSA7G007970|CSA3G005790|CSA7G007170|CSAUNG110800|CSA3G002160|CSA5G008380|CSA3G048040|CSA5G024070|CSA2G001350|CSA6G042580|CSA5G003910|CSA5G027900|CSA2G001230|CSA7G001850|CSA6G022710|CSA1G014490|CSA5G031040|CSA5G034550|CSA6G001360|CSA6G046270|CSA3G004570|CSA1G008250|CSA3G046410|CSA6G049540|CSA2G001360|CSA2G034720|CSA3G002250|CS…
3677	0.0025344	0.037728	122	1331	0.0916604	972	13522	DNA binding	CSA6G021510|CSA1G007320|CSA1G001460|CSA3G004450|CSA6G041640|CSA1G003920|CSA3G039160|CSA5G034270|CSA7G031430|CSA4G006480|CSA1G039310|CSA2G012870|CSA7G027860|CSA6G035750|CSA2G035630|CSA1G008780|CSA7G000920|CSA7G021760|CSA1G004720|CSA7G006500|CSA5G027070|CSA4G037760|CSA6G013210|CSA6G003660|CSA3G018200|CSA5G033980|CSA7G026420|CSA5G032930|CSA3G049360|CSA3G042290|CSA6G043240|CSA3G004830|CSA4G000990|CSA…
44248	0.0026227	0.038603	36	308	0.116883	972	13522	cellular catabolic process	CSA1G008830|CSA3G000690|CSA1G009520|CSA2G031230|CSA2G028900|CSA6G039680|CSA6G001840|CSA3G013100|CSA5G038920|CSA3G009670|CSA6G039710|CSA4G032560|CSA6G034220|CSA6G047290|CSA5G030400|CSA7G034900|CSA4G031710|CSA4G025500|CSA5G037190|CSA2G025820|CSA7G034340|CSA6G021700|CSA6G039690|CSA6G032330|CSA5G034230|CSA6G038810|CSA3G011970|CSA7G035320|CSA6G039700|CSA6G039720|CSA1G040750|CSA3G003480|CSA2G002170|CSA…
42255	0.0033169	0.046721	3	5	0.6	972	13522	ribosome assembly	CSA7G034610|CSA3G014560|CSA2G019580
45088	0.0033169	0.046721	3	5	0.6	972	13522	regulation of innate immune response	CSA1G003780|CSA5G034250|CSA7G030280
2682	0.0033169	0.046721	3	5	0.6	972	13522	regulation of immune system process	CSA1G003780|CSA5G034250|CSA7G030280
50776	0.0033169	0.046721	3	5	0.6	972	13522	regulation of immune response	CSA1G003780|CSA5G034250|CSA7G030280
43492	0.0034883	0.048613	14	87	0.16092	972	13522	ATPase activity, coupled to movement of substances	CSA7G018610|CSA1G002200|CSA1G002210|CSA5G020120|CSA2G009630|CSA7G034680|CSA3G021800|CSA7G027670|CSA5G037860|CSA5G030540|CSA2G010880|CSA6G007310|CSA2G009640|CSA1G006380

## Sheet: GO_du
Table 3c The GO enrichment analysis of down-up genes
GO-ID	p-value	corr p-value	x	n		X	N	Description	Genes in test set
15979	5.0399e-41	7.6204e-38	54	81	0.666667	1037	13522	photosynthesis	CSA6G051520|CSA5G020220|CSA3G004330|CSA3G022840|CSA6G052210|CSA4G007520|CSA4G007600|CSA6G041600|CSA1G041230|CSA3G011780|CSA5G029240|CSA1G046680|CSA6G013800|CSA3G025000|CSA2G001270|CSA6G051530|CSA7G002620|CSA5G030270|CSA7G004050|CSA3G008130|CSA1G011330|CSA5G026220|CSA2G009680|CSA1G002370|CSA4G026100|CSA2G019570|CSA1G002410|CSA1G005600|CSA3G013420|CSA6G035930|CSA1G043710|CSA4G033870|CSA7G027520|CSA…
9579	3.6286e-28	2.7432e-25	36	53	0.679245	1037	13522	thylakoid	CSA5G020220|CSA3G004330|CSA3G022840|CSA2G019570|CSA6G052210|CSA4G007520|CSA4G007600|CSA6G041600|CSA3G013420|CSA6G035930|CSA7G033430|CSA5G036960|CSA7G027520|CSA1G046680|CSA5G026270|CSA2G031600|CSA3G025000|CSA6G042680|CSA2G025120|CSA2G001270|CSA1G002440|CSA1G040810|CSA7G031150|CSA7G010090|CSA2G010090|CSA5G030690|CSA6G008350|CSA7G004050|CSA3G008130|CSA3G008350|CSA4G008970|CSA1G011330|CSA5G026220|CSA…
44436	2.3821e-24	1.2006e-21	32	49	0.653061	1037	13522	thylakoid part	CSA5G020220|CSA3G004330|CSA3G022840|CSA2G019570|CSA6G052210|CSA4G007520|CSA4G007600|CSA6G041600|CSA3G013420|CSA6G035930|CSA5G036960|CSA7G027520|CSA1G046680|CSA5G026270|CSA2G031600|CSA3G025000|CSA6G042680|CSA2G025120|CSA2G001270|CSA1G002440|CSA1G040810|CSA7G031150|CSA7G010090|CSA2G010090|CSA5G030690|CSA7G004050|CSA3G008130|CSA1G011330|CSA5G026220|CSA1G015710|CSA2G009680|CSA7G025030
34357	2.0865e-23	7.8868e-21	31	48	0.645833	1037	13522	photosynthetic membrane	CSA5G020220|CSA3G004330|CSA3G022840|CSA2G019570|CSA6G052210|CSA4G007520|CSA4G007600|CSA6G041600|CSA3G013420|CSA6G035930|CSA5G036960|CSA7G027520|CSA1G046680|CSA5G026270|CSA2G031600|CSA3G025000|CSA6G042680|CSA2G025120|CSA2G001270|CSA1G002440|CSA1G040810|CSA7G031150|CSA2G010090|CSA5G030690|CSA7G004050|CSA3G008130|CSA1G011330|CSA5G026220|CSA1G015710|CSA2G009680|CSA7G025030
3824	4.2631e-22	1.2892e-19	590	5760	0.102431	1037	13522	catalytic activity	CSA6G018460|CSA4G025670|CSA4G025310|CSA1G032120|CSA2G030460|CSA3G039440|CSA3G037140|CSA6G052370|CSA3G038470|CSA7G005670|CSA5G032120|CSA7G005790|CSA7G006640|CSA7G002280|CSA1G010690|CSA3G018610|CSA3G040780|CSA5G033210|CSA1G009350|CSA3G050100|CSA5G000640|CSA3G006740|CSA2G009510|CSA1G036610|CSA6G044520|CSA4G006920|CSA6G015080|CSA6G039150|CSA7G002270|CSA7G008930|CSA7G029770|CSA7G001060|CSA6G031300|CSA…
9521	5.3005e-21	1.3357e-18	28	44	0.636364	1037	13522	photosystem	CSA5G020220|CSA3G004330|CSA3G022840|CSA2G019570|CSA6G052210|CSA4G007520|CSA4G007600|CSA6G041600|CSA3G013420|CSA6G035930|CSA7G027520|CSA1G046680|CSA5G026270|CSA2G031600|CSA3G025000|CSA6G042680|CSA2G025120|CSA2G001270|CSA1G040810|CSA7G031150|CSA2G010090|CSA5G030690|CSA3G008130|CSA1G011330|CSA5G026220|CSA1G015710|CSA2G009680|CSA7G025030
8152	3.5503e-20	7.6686e-18	581	5737	0.101272	1037	13522	metabolic process	CSA6G018460|CSA4G025670|CSA4G025310|CSA3G004330|CSA2G030460|CSA6G052370|CSA7G005670|CSA5G032120|CSA7G005790|CSA7G006640|CSA7G002280|CSA1G010690|CSA3G018610|CSA5G033210|CSA1G009350|CSA5G002940|CSA5G000640|CSA3G006740|CSA6G044520|CSA4G006920|CSA6G015080|CSA6G039150|CSA7G002270|CSA4G036670|CSA7G008930|CSA7G029770|CSA7G001060|CSA6G031300|CSA4G012000|CSA3G016420|CSA4G002690|CSA3G003360|CSA6G041580|CSA…
9765	1.2025e-18	2.2728e-16	18	20	0.9	1037	13522	photosynthesis, light harvesting	CSA1G032510|CSA2G002980|CSA3G005950|CSA4G026100|CSA6G051520|CSA5G025740|CSA6G051530|CSA7G002620|CSA3G031580|CSA1G002410|CSA1G005600|CSA5G039350|CSA5G030270|CSA1G043710|CSA1G041230|CSA6G005340|CSA2G027790|CSA6G013800
9523	6.1522e-18	1.0336e-15	20	26	0.769231	1037	13522	photosystem II	CSA2G031600|CSA6G042680|CSA2G025120|CSA2G001270|CSA5G020220|CSA1G040810|CSA3G022840|CSA2G019570|CSA4G007520|CSA4G007600|CSA7G031150|CSA6G035930|CSA5G030690|CSA3G008130|CSA7G027520|CSA1G011330|CSA5G026220|CSA1G015710|CSA7G025030|CSA5G026270
9654	1.9948e-15	3.0161e-13	15	17	0.882353	1037	13522	oxygen evolving complex	CSA2G031600|CSA6G042680|CSA5G020220|CSA3G022840|CSA2G019570|CSA4G007520|CSA4G007600|CSA7G031150|CSA6G035930|CSA3G008130|CSA1G011330|CSA5G026220|CSA1G015710|CSA7G025030|CSA5G026270
19684	3.3989e-15	4.6719e-13	22	39	0.564103	1037	13522	photosynthesis, light reaction	CSA1G032510|CSA2G002980|CSA3G005950|CSA6G042680|CSA4G026100|CSA6G051520|CSA5G025740|CSA1G002440|CSA6G051530|CSA7G002620|CSA7G004300|CSA3G031580|CSA1G002410|CSA1G005600|CSA5G039350|CSA5G030270|CSA1G043710|CSA1G041230|CSA6G005340|CSA3G011780|CSA2G027790|CSA6G013800
19898	2.686e-13	3.3843e-11	13	15	0.866667	1037	13522	extrinsic to membrane	CSA2G031600|CSA5G020220|CSA3G022840|CSA2G019570|CSA4G007520|CSA7G031150|CSA6G035930|CSA3G008130|CSA1G011330|CSA5G026220|CSA1G015710|CSA7G025030|CSA5G026270
786	1.9629e-10	2.283e-08	19	45	0.422222	1037	13522	nucleosome	CSA6G017030|CSA6G017040|CSA6G040150|CSA6G017120|CSA6G017110|CSA6G022220|CSA1G014090|CSA3G035090|CSA1G014160|CSA6G017050|CSA7G031310|CSA1G042610|CSA6G003690|CSA7G028400|CSA2G013770|CSA1G014110|CSA2G006590|CSA1G012840|CSA4G024060
32993	4.8409e-10	5.2281e-08	19	47	0.404255	1037	13522	protein-DNA complex	CSA6G017030|CSA6G017040|CSA6G040150|CSA6G017120|CSA6G017110|CSA6G022220|CSA1G014090|CSA3G035090|CSA1G014160|CSA6G017050|CSA7G031310|CSA1G042610|CSA6G003690|CSA7G028400|CSA2G013770|CSA1G014110|CSA2G006590|CSA1G012840|CSA4G024060
6091	1.1907e-08	1.2002e-06	46	246	0.186992	1037	13522	generation of precursor metabolites and energy	CSA1G007980|CSA4G026100|CSA6G051520|CSA3G019210|CSA1G002410|CSA1G005600|CSA2G032160|CSA7G005670|CSA1G043710|CSA3G036980|CSA1G041230|CSA6G013500|CSA7G006840|CSA6G031530|CSA1G016950|CSA6G039950|CSA5G035850|CSA3G011780|CSA1G010750|CSA7G007250|CSA6G013800|CSA1G032510|CSA2G002980|CSA3G005950|CSA6G042680|CSA4G025880|CSA5G025740|CSA1G002440|CSA6G051530|CSA6G044520|CSA7G002620|CSA6G002740|CSA3G015360|CSA…
44427	1.9194e-08	1.8139e-06	31	134	0.231343	1037	13522	chromosomal part	CSA6G017030|CSA6G040150|CSA6G017110|CSA6G022220|CSA3G032880|CSA7G000210|CSA2G003500|CSA1G014160|CSA6G017050|CSA7G031310|CSA6G003690|CSA7G029940|CSA1G014110|CSA6G017040|CSA6G017120|CSA6G051630|CSA1G014090|CSA3G035090|CSA5G039570|CSA4G012090|CSA6G053180|CSA1G042610|CSA7G028400|CSA2G013770|CSA5G013990|CSA2G006590|CSA1G012840|CSA1G042250|CSA2G010800|CSA4G024060|CSA6G008170
6270	4.5647e-08	4.0599e-06	8	10	0.8	1037	13522	DNA-dependent DNA replication initiation	CSA7G026150|CSA6G053180|CSA7G029940|CSA6G051630|CSA3G035520|CSA3G032880|CSA7G000210|CSA2G003500
46982	5.4865e-08	4.6087e-06	21	72	0.291667	1037	13522	protein heterodimerization activity	CSA6G017030|CSA6G017040|CSA6G040150|CSA6G017120|CSA6G017110|CSA6G022220|CSA1G014090|CSA3G035090|CSA1G014160|CSA6G017050|CSA7G034500|CSA7G031310|CSA6G009670|CSA1G042610|CSA6G003690|CSA7G028400|CSA2G013770|CSA1G014110|CSA2G006590|CSA1G012840|CSA4G024060
5694	1.6747e-07	1.3327e-05	32	154	0.207792	1037	13522	chromosome	CSA6G017030|CSA6G040150|CSA6G017110|CSA6G022220|CSA3G032880|CSA7G000210|CSA2G003500|CSA1G014160|CSA6G017050|CSA7G031310|CSA6G003690|CSA7G029940|CSA1G014110|CSA6G017040|CSA6G017120|CSA6G051630|CSA1G014090|CSA3G035090|CSA5G039570|CSA4G012090|CSA6G053180|CSA3G016100|CSA1G042610|CSA7G028400|CSA2G013770|CSA5G013990|CSA2G006590|CSA1G012840|CSA1G042250|CSA2G010800|CSA4G024060|CSA6G008170
42555	2.0073e-07	1.4453e-05	6	6	1	1037	13522	MCM complex	CSA6G053180|CSA7G029940|CSA6G051630|CSA3G032880|CSA7G000210|CSA2G003500
16491	1.9401e-07	1.4453e-05	139	1191	0.116709	1037	13522	oxidoreductase activity	CSA3G000770|CSA1G028300|CSA4G025310|CSA4G023930|CSA3G012230|CSA5G015620|CSA1G010690|CSA3G018610|CSA3G043770|CSA5G030860|CSA3G041590|CSA5G034820|CSA3G007050|CSA4G001630|CSA2G003650|CSA1G004200|CSA2G025420|CSA6G048960|CSA2G009510|CSA4G023760|CSA6G044520|CSA6G039150|CSA7G008930|CSA7G004050|CSA7G001060|CSA3G016820|CSA4G030690|CSA4G007220|CSA4G002690|CSA1G014400|CSA4G007180|CSA1G009060|CSA2G025570|CSA…
16020	2.1389e-07	1.47e-05	177	1609	0.110006	1037	13522	membrane	CSA3G048950|CSA1G029510|CSA3G004330|CSA6G039200|CSA3G022840|CSA4G007600|CSA7G003640|CSA2G034780|CSA3G039440|CSA3G038470|CSA1G036040|CSA5G032120|CSA7G005790|CSA1G010170|CSA1G041230|CSA3G035990|CSA5G007970|CSA2G016430|CSA6G039950|CSA5G036960|CSA3G011820|CSA5G024350|CSA3G006360|CSA6G037090|CSA2G025140|CSA5G000640|CSA2G029980|CSA5G006620|CSA2G034770|CSA4G037130|CSA7G004050|CSA3G008130|CSA6G037400|CSA…
785	2.4905e-07	1.6372e-05	21	78	0.269231	1037	13522	chromatin	CSA6G017030|CSA6G017040|CSA6G040150|CSA6G017120|CSA6G017110|CSA6G022220|CSA1G014090|CSA3G035090|CSA1G014160|CSA6G017050|CSA7G031310|CSA1G042610|CSA6G003690|CSA7G028400|CSA2G013770|CSA1G014110|CSA5G013990|CSA2G006590|CSA1G012840|CSA1G042250|CSA4G024060
55114	4.202e-07	2.6472e-05	124	1046	0.118547	1037	13522	oxidation reduction	CSA3G000770|CSA1G028300|CSA4G025310|CSA4G023930|CSA3G012230|CSA3G018610|CSA6G039950|CSA3G011780|CSA3G043770|CSA5G030860|CSA3G041590|CSA5G034820|CSA3G007050|CSA4G001630|CSA2G003650|CSA1G004200|CSA2G025420|CSA4G023760|CSA6G039150|CSA7G008930|CSA7G004050|CSA7G001060|CSA3G016820|CSA4G007220|CSA4G002690|CSA4G007180|CSA1G009060|CSA2G025570|CSA2G003300|CSA6G051820|CSA5G023350|CSA6G052510|CSA4G001680|CSA…
8150	1.4884e-06	9.0018e-05	736	8700	0.0845977	1037	13522	biological_process	CSA6G018460|CSA6G042570|CSA4G025670|CSA6G041000|CSA4G025310|CSA3G004330|CSA2G030460|CSA6G052370|CSA7G005670|CSA5G032120|CSA7G005790|CSA7G006640|CSA7G002280|CSA1G010690|CSA3G018610|CSA5G033210|CSA1G009350|CSA6G037090|CSA5G002940|CSA5G000640|CSA3G006740|CSA2G009510|CSA1G034310|CSA6G044520|CSA1G036850|CSA1G001970|CSA4G010070|CSA4G006920|CSA6G015080|CSA6G039150|CSA7G002270|CSA4G036670|CSA7G008930|CSA…
44237	2.4131e-06	0.00014033	359	3829	0.0937582	1037	13522	cellular metabolic process	CSA7G023530|CSA3G004330|CSA1G004330|CSA3G021110|CSA2G030460|CSA7G005670|CSA1G036050|CSA5G032120|CSA7G002280|CSA3G013840|CSA1G010690|CSA6G039950|CSA6G039830|CSA3G011780|CSA5G029520|CSA4G030100|CSA5G030500|CSA1G009350|CSA3G044460|CSA5G002940|CSA2G003530|CSA1G007950|CSA2G025420|CSA3G006740|CSA2G001110|CSA6G050640|CSA6G044520|CSA5G006620|CSA6G036680|CSA4G006920|CSA6G015080|CSA5G039570|CSA7G002270|CSA…
9538	2.6292e-06	0.00014723	5	5	1	1037	13522	photosystem I reaction center	CSA3G025000|CSA3G013420|CSA2G009680|CSA1G046680|CSA2G010090
9522	4.6037e-06	0.0002486	8	15	0.533333	1037	13522	photosystem I	CSA3G025000|CSA3G013420|CSA3G004330|CSA6G052210|CSA6G041600|CSA2G009680|CSA1G046680|CSA2G010090
6261	4.8844e-06	0.00025466	10	24	0.416667	1037	13522	DNA-dependent DNA replication	CSA7G026150|CSA6G053180|CSA7G029940|CSA6G051630|CSA3G035520|CSA3G032880|CSA7G000210|CSA2G003500|CSA5G039570|CSA6G008170
15995	1.377e-05	0.00069399	6	9	0.666667	1037	13522	chlorophyll biosynthetic process	CSA1G002370|CSA4G033870|CSA6G050640|CSA4G031720|CSA4G011730|CSA6G039120
44271	2.2926e-05	0.0011182	46	319	0.144201	1037	13522	cellular nitrogen compound biosynthetic process	CSA2G003300|CSA1G002370|CSA6G044790|CSA5G023350|CSA5G024880|CSA4G028640|CSA7G031380|CSA2G030460|CSA2G032160|CSA3G019470|CSA6G039120|CSA7G030560|CSA1G036050|CSA1G010170|CSA3G013840|CSA4G033870|CSA3G040860|CSA3G041590|CSA1G009350|CSA1G010750|CSA6G048760|CSA6G048980|CSA3G002580|CSA6G048960|CSA2G030530|CSA2G001110|CSA6G050640|CSA5G020010|CSA6G002740|CSA3G035070|CSA6G034080|CSA3G004920|CSA1G038260|CSA…
42440	2.8226e-05	0.0013234	11	34	0.323529	1037	13522	pigment metabolic process	CSA3G038300|CSA1G002370|CSA6G013410|CSA4G033870|CSA6G050640|CSA4G002690|CSA7G031380|CSA5G025230|CSA4G031720|CSA4G011730|CSA6G039120
6544	2.8885e-05	0.0013234	12	40	0.3	1037	13522	glycine metabolic process	CSA2G025570|CSA6G044790|CSA5G039900|CSA3G047640|CSA5G024880|CSA4G028640|CSA2G030460|CSA3G015360|CSA6G008710|CSA3G049390|CSA7G002750|CSA1G010620
33014	3.4998e-05	0.0014893	10	29	0.344828	1037	13522	tetrapyrrole biosynthetic process	CSA1G002370|CSA6G013410|CSA4G033870|CSA4G007220|CSA2G030530|CSA6G050640|CSA7G031380|CSA4G031720|CSA4G011730|CSA6G039120
46148	3.4998e-05	0.0014893	10	29	0.344828	1037	13522	pigment biosynthetic process	CSA3G038300|CSA1G002370|CSA6G013410|CSA4G033870|CSA6G050640|CSA4G002690|CSA7G031380|CSA4G031720|CSA4G011730|CSA6G039120
6629	3.5458e-05	0.0014893	54	402	0.134328	1037	13522	lipid metabolic process	CSA4G025950|CSA2G001380|CSA5G023610|CSA1G004330|CSA6G005620|CSA2G016630|CSA3G038300|CSA2G017600|CSA5G010130|CSA5G029520|CSA1G011860|CSA3G044460|CSA3G008180|CSA1G000160|CSA4G001630|CSA6G023960|CSA2G025420|CSA3G006740|CSA2G001110|CSA5G006620|CSA3G031160|CSA4G002690|CSA1G029290|CSA1G012820|CSA6G041580|CSA6G052510|CSA4G001680|CSA2G024400|CSA1G034040|CSA5G004710|CSA1G012180|CSA1G017150|CSA1G017100|CSA…
6779	4.0316e-05	0.0015897	9	24	0.375	1037	13522	porphyrin biosynthetic process	CSA1G002370|CSA6G013410|CSA4G033870|CSA4G007220|CSA6G050640|CSA7G031380|CSA4G031720|CSA4G011730|CSA6G039120
44255	3.9108e-05	0.0015897	39	260	0.15	1037	13522	cellular lipid metabolic process	CSA4G025950|CSA6G041580|CSA2G001380|CSA5G023610|CSA1G004330|CSA6G005620|CSA1G034040|CSA1G012180|CSA1G017150|CSA2G016630|CSA3G038300|CSA1G017100|CSA2G017600|CSA3G008320|CSA5G010130|CSA4G006100|CSA5G029520|CSA1G011860|CSA3G044460|CSA1G000160|CSA6G023960|CSA4G001530|CSA2G025420|CSA3G006740|CSA3G048840|CSA2G001110|CSA5G020010|CSA5G006620|CSA7G026160|CSA1G041340|CSA2G013590|CSA2G009420|CSA1G007140|CSA…
44281	4.1004e-05	0.0015897	125	1158	0.107945	1037	13522	small molecule metabolic process	CSA4G025950|CSA1G004330|CSA3G021110|CSA5G004970|CSA2G030460|CSA2G001740|CSA2G034780|CSA7G005670|CSA1G036050|CSA1G010170|CSA3G013840|CSA1G016950|CSA3G041590|CSA1G009350|CSA3G042440|CSA5G002940|CSA2G025420|CSA6G048960|CSA4G023760|CSA6G044520|CSA5G006620|CSA2G034770|CSA6G015080|CSA1G011490|CSA3G016820|CSA4G030690|CSA5G033620|CSA1G029250|CSA2G025570|CSA2G003300|CSA3G047640|CSA4G028640|CSA3G028840|CSA…
6721	5.8729e-05	0.0021658	9	25	0.36	1037	13522	terpenoid metabolic process	CSA2G016630|CSA3G038300|CSA2G001110|CSA4G006100|CSA5G020010|CSA4G002690|CSA6G005620|CSA1G012820|CSA2G031800
16114	5.8729e-05	0.0021658	9	25	0.36	1037	13522	terpenoid biosynthetic process	CSA2G016630|CSA3G038300|CSA2G001110|CSA4G006100|CSA5G020010|CSA4G002690|CSA6G005620|CSA1G012820|CSA2G031800
33013	6.8125e-05	0.0024525	11	37	0.297297	1037	13522	tetrapyrrole metabolic process	CSA1G002370|CSA6G013410|CSA4G033870|CSA4G007220|CSA2G030530|CSA6G050640|CSA7G031380|CSA5G025230|CSA4G031720|CSA4G011730|CSA6G039120
5975	8.1657e-05	0.0028713	91	801	0.113608	1037	13522	carbohydrate metabolic process	CSA3G001220|CSA3G022160|CSA5G001420|CSA1G005660|CSA1G032200|CSA3G021110|CSA7G003840|CSA5G004970|CSA3G015790|CSA1G031470|CSA2G034780|CSA7G005670|CSA5G032120|CSA3G009790|CSA7G006840|CSA3G013840|CSA1G016950|CSA5G033210|CSA2G002080|CSA6G045210|CSA3G048980|CSA6G016450|CSA3G047730|CSA3G020110|CSA6G044520|CSA1G032890|CSA2G034770|CSA6G015080|CSA2G015280|CSA1G022900|CSA7G029570|CSA2G015110|CSA2G011150|CSA…
15976	9.2517e-05	0.0031792	14	58	0.241379	1037	13522	carbon utilization	CSA3G001220|CSA2G004240|CSA4G025880|CSA3G030440|CSA1G037750|CSA2G015280|CSA3G009790|CSA6G013500|CSA7G006840|CSA6G004010|CSA1G016950|CSA5G035850|CSA3G042440|CSA7G021470
6260	0.00010395	0.0034926	16	73	0.219178	1037	13522	DNA replication	CSA2G001260|CSA1G002970|CSA6G051630|CSA3G032880|CSA7G000210|CSA2G003500|CSA5G039570|CSA5G035370|CSA4G012090|CSA7G026150|CSA6G053180|CSA7G029940|CSA3G035520|CSA6G042080|CSA2G010800|CSA6G008170
9507	0.00012191	0.0040072	10	33	0.30303	1037	13522	chloroplast	CSA2G016630|CSA6G012710|CSA1G002440|CSA5G036960|CSA7G027520|CSA6G050640|CSA3G027740|CSA3G012710|CSA4G011730|CSA6G039120
18130	0.00013354	0.0042961	22	122	0.180328	1037	13522	heterocycle biosynthetic process	CSA2G003300|CSA1G002370|CSA2G030530|CSA2G001110|CSA6G050640|CSA5G020010|CSA7G031380|CSA6G039120|CSA1G038260|CSA1G036050|CSA7G026240|CSA6G013410|CSA4G033870|CSA4G007220|CSA1G041840|CSA3G040860|CSA6G014760|CSA3G005340|CSA3G041590|CSA6G048980|CSA4G031720|CSA4G011730
19203	0.00016151	0.0046962	4	5	0.8	1037	13522	carbohydrate phosphatase activity	CSA5G035770|CSA7G006840|CSA6G004010|CSA4G025880
6778	0.00016095	0.0046962	10	34	0.294118	1037	13522	porphyrin metabolic process	CSA1G002370|CSA6G013410|CSA4G033870|CSA4G007220|CSA6G050640|CSA7G031380|CSA5G025230|CSA4G031720|CSA4G011730|CSA6G039120
6006	0.00015309	0.0046962	24	140	0.171429	1037	13522	glucose metabolic process	CSA2G004240|CSA4G025880|CSA3G020110|CSA3G021110|CSA3G015360|CSA2G034770|CSA1G037750|CSA2G034780|CSA4G006820|CSA6G015080|CSA4G037480|CSA2G015280|CSA7G005670|CSA3G036980|CSA3G009790|CSA6G013500|CSA7G006840|CSA6G031530|CSA6G004010|CSA1G016950|CSA3G013570|CSA7G021470|CSA5G028880|CSA2G007280
43436	0.00016051	0.0046962	72	612	0.117647	1037	13522	oxoacid metabolic process	CSA4G025950|CSA6G014060|CSA6G044790|CSA5G023610|CSA2G030460|CSA7G003960|CSA7G002750|CSA3G019470|CSA2G016630|CSA7G005670|CSA6G012710|CSA7G006840|CSA3G013840|CSA1G016950|CSA3G040860|CSA2G002080|CSA3G041590|CSA6G048760|CSA3G045350|CSA1G000160|CSA5G002940|CSA6G023960|CSA2G025420|CSA3G002580|CSA6G048960|CSA4G023760|CSA6G044520|CSA5G006620|CSA3G004920|CSA2G015280|CSA1G011490|CSA3G016820|CSA3G040230|CSA…
19752	0.00016051	0.0046962	72	612	0.117647	1037	13522	carboxylic acid metabolic process	CSA4G025950|CSA6G014060|CSA6G044790|CSA5G023610|CSA2G030460|CSA7G003960|CSA7G002750|CSA3G019470|CSA2G016630|CSA7G005670|CSA6G012710|CSA7G006840|CSA3G013840|CSA1G016950|CSA3G040860|CSA2G002080|CSA3G041590|CSA6G048760|CSA3G045350|CSA1G000160|CSA5G002940|CSA6G023960|CSA2G025420|CSA3G002580|CSA6G048960|CSA4G023760|CSA6G044520|CSA5G006620|CSA3G004920|CSA2G015280|CSA1G011490|CSA3G016820|CSA3G040230|CSA…
8610	0.000171	0.0047879	30	194	0.154639	1037	13522	lipid biosynthetic process	CSA4G025950|CSA2G001380|CSA5G023610|CSA6G052510|CSA1G004330|CSA6G005620|CSA1G034040|CSA1G012180|CSA2G016630|CSA3G038300|CSA2G017600|CSA4G006100|CSA3G008180|CSA1G029420|CSA1G000160|CSA6G023960|CSA2G025420|CSA3G006740|CSA2G001110|CSA5G020010|CSA5G006620|CSA7G026160|CSA1G041340|CSA1G007140|CSA4G002690|CSA2G003280|CSA1G029290|CSA1G012820|CSA3G008190|CSA2G031800
6082	0.00016872	0.0047879	72	613	0.117455	1037	13522	organic acid metabolic process	CSA4G025950|CSA6G014060|CSA6G044790|CSA5G023610|CSA2G030460|CSA7G003960|CSA7G002750|CSA3G019470|CSA2G016630|CSA7G005670|CSA6G012710|CSA7G006840|CSA3G013840|CSA1G016950|CSA3G040860|CSA2G002080|CSA3G041590|CSA6G048760|CSA3G045350|CSA1G000160|CSA5G002940|CSA6G023960|CSA2G025420|CSA3G002580|CSA6G048960|CSA4G023760|CSA6G044520|CSA5G006620|CSA3G004920|CSA2G015280|CSA1G011490|CSA3G016820|CSA3G040230|CSA…
6563	0.00020324	0.0055873	12	48	0.25	1037	13522	L-serine metabolic process	CSA2G025570|CSA6G044790|CSA5G039900|CSA3G047640|CSA5G024880|CSA5G030130|CSA4G028640|CSA2G030460|CSA3G015360|CSA6G008710|CSA7G002750|CSA1G010620
9536	0.00020999	0.0056698	10	35	0.285714	1037	13522	plastid	CSA2G016630|CSA6G012710|CSA1G002440|CSA5G036960|CSA7G027520|CSA6G050640|CSA3G027740|CSA3G012710|CSA4G011730|CSA6G039120
16051	0.00022858	0.0060634	28	179	0.156425	1037	13522	carbohydrate biosynthetic process	CSA3G048610|CSA5G004970|CSA3G038290|CSA2G034780|CSA1G034040|CSA7G030560|CSA7G005670|CSA3G036980|CSA6G013500|CSA7G006840|CSA3G013840|CSA6G031530|CSA4G033870|CSA1G016950|CSA4G032820|CSA4G025880|CSA1G032890|CSA3G015360|CSA2G034770|CSA4G006820|CSA6G015080|CSA2G015280|CSA1G022900|CSA6G004010|CSA3G013570|CSA7G008370|CSA7G021470|CSA5G028880
9058	0.00024433	0.0063694	144	1424	0.101124	1037	13522	biosynthetic process	CSA4G025950|CSA1G004330|CSA5G004970|CSA3G032880|CSA2G030460|CSA2G034780|CSA7G005670|CSA1G036050|CSA5G032120|CSA1G010170|CSA3G013840|CSA1G016950|CSA6G039830|CSA3G041590|CSA1G009350|CSA2G030610|CSA2G025420|CSA3G006740|CSA6G048960|CSA2G001110|CSA6G050640|CSA5G006620|CSA1G032890|CSA2G034770|CSA6G015080|CSA5G039570|CSA5G035370|CSA4G012090|CSA7G029770|CSA3G016820|CSA5G033620|CSA4G007220|CSA3G016420|CSA…
44283	0.00025332	0.0064919	54	433	0.124711	1037	13522	small molecule biosynthetic process	CSA4G025950|CSA6G044790|CSA5G023610|CSA5G004970|CSA2G030460|CSA2G032160|CSA3G019470|CSA2G016630|CSA7G005670|CSA1G036050|CSA1G010170|CSA7G006840|CSA3G013840|CSA1G016950|CSA3G040860|CSA3G041590|CSA1G009350|CSA6G048760|CSA1G000160|CSA6G023960|CSA2G025420|CSA3G002580|CSA6G048960|CSA5G006620|CSA3G004920|CSA2G015280|CSA3G016820|CSA3G040230|CSA5G033620|CSA1G009540|CSA3G005340|CSA5G028880|CSA2G003300|CSA…
15994	0.00028993	0.0071864	9	30	0.3	1037	13522	chlorophyll metabolic process	CSA1G002370|CSA6G013410|CSA4G033870|CSA4G007220|CSA6G050640|CSA5G025230|CSA4G031720|CSA4G011730|CSA6G039120
6807	0.00028585	0.0071864	151	1510	0.1	1037	13522	nitrogen compound metabolic process	CSA1G004330|CSA3G021110|CSA5G004970|CSA3G032880|CSA2G030460|CSA2G001740|CSA2G034780|CSA1G036050|CSA1G010170|CSA7G002280|CSA3G013840|CSA1G016950|CSA6G039830|CSA3G041590|CSA5G030500|CSA1G009350|CSA3G042440|CSA5G002940|CSA2G030610|CSA6G048960|CSA2G001110|CSA4G023760|CSA6G050640|CSA6G036680|CSA2G034770|CSA5G039570|CSA5G035370|CSA4G012090|CSA1G011490|CSA3G016820|CSA5G033620|CSA4G007220|CSA3G046930|CSA…
16787	0.00031142	0.0075946	177	1817	0.0974133	1037	13522	hydrolase activity	CSA5G017370|CSA6G040670|CSA3G048950|CSA6G051200|CSA6G039200|CSA1G032120|CSA2G001740|CSA3G039440|CSA3G037140|CSA1G036040|CSA7G005790|CSA1G010170|CSA3G035990|CSA7G002280|CSA1G040020|CSA5G035230|CSA3G040780|CSA2G016430|CSA3G039710|CSA6G002680|CSA5G030500|CSA3G044460|CSA6G045210|CSA5G000640|CSA2G003410|CSA3G047730|CSA3G037790|CSA4G037130|CSA4G012090|CSA2G015110|CSA2G015990|CSA6G030970|CSA7G006230|CSA…
46834	0.00035193	0.0081865	6	14	0.428571	1037	13522	lipid phosphorylation	CSA1G017100|CSA6G041580|CSA1G011860|CSA6G049640|CSA3G044460|CSA1G017150
46854	0.00035193	0.0081865	6	14	0.428571	1037	13522	phosphoinositide phosphorylation	CSA1G017100|CSA6G041580|CSA1G011860|CSA6G049640|CSA3G044460|CSA1G017150
16741	0.00034145	0.0081865	31	211	0.146919	1037	13522	transferase activity, transferring one-carbon groups	CSA6G018460|CSA6G044790|CSA4G028640|CSA1G004330|CSA5G010380|CSA7G031380|CSA2G030460|CSA2G001520|CSA5G010870|CSA1G010170|CSA7G001370|CSA5G008400|CSA6G001350|CSA2G013820|CSA3G004020|CSA3G040460|CSA2G003590|CSA3G045350|CSA5G032900|CSA3G027600|CSA3G002580|CSA3G004920|CSA2G036010|CSA5G030690|CSA5G013990|CSA1G007140|CSA3G041040|CSA3G027790|CSA1G010620|CSA1G042250|CSA1G029250
8299	0.00037179	0.0085175	11	44	0.25	1037	13522	isoprenoid biosynthetic process	CSA2G016630|CSA3G038300|CSA2G017600|CSA3G006740|CSA2G001110|CSA4G006100|CSA5G020010|CSA4G002690|CSA6G005620|CSA1G012820|CSA2G031800
8441	0.00044983	0.0094956	3	3	1	1037	13522	3'(2'),5'-bisphosphate nucleotidase activity	CSA6G041580|CSA1G011860|CSA3G044460
16851	0.00044983	0.0094956	3	3	1	1037	13522	magnesium chelatase activity	CSA6G050640|CSA4G011730|CSA6G039120
10007	0.00044983	0.0094956	3	3	1	1037	13522	magnesium chelatase complex	CSA6G050640|CSA4G011730|CSA6G039120
51002	0.00044983	0.0094956	3	3	1	1037	13522	ligase activity, forming nitrogen-metal bonds	CSA6G050640|CSA4G011730|CSA6G039120
51003	0.00044983	0.0094956	3	3	1	1037	13522	ligase activity, forming nitrogen-metal bonds, forming coordination complexes	CSA6G050640|CSA4G011730|CSA6G039120
6720	0.00045845	0.0094956	11	45	0.244444	1037	13522	isoprenoid metabolic process	CSA2G016630|CSA3G038300|CSA2G017600|CSA3G006740|CSA2G001110|CSA4G006100|CSA5G020010|CSA4G002690|CSA6G005620|CSA1G012820|CSA2G031800
42180	0.00045786	0.0094956	72	634	0.113565	1037	13522	cellular ketone metabolic process	CSA4G025950|CSA6G014060|CSA6G044790|CSA5G023610|CSA2G030460|CSA7G003960|CSA7G002750|CSA3G019470|CSA2G016630|CSA7G005670|CSA6G012710|CSA7G006840|CSA3G013840|CSA1G016950|CSA3G040860|CSA2G002080|CSA3G041590|CSA6G048760|CSA3G045350|CSA1G000160|CSA5G002940|CSA6G023960|CSA2G025420|CSA3G002580|CSA6G048960|CSA4G023760|CSA6G044520|CSA5G006620|CSA3G004920|CSA2G015280|CSA1G011490|CSA3G016820|CSA3G040230|CSA…
5996	0.00070424	0.014389	26	173	0.150289	1037	13522	monosaccharide metabolic process	CSA3G021110|CSA5G004970|CSA1G037750|CSA2G034780|CSA4G037480|CSA7G005670|CSA3G036980|CSA3G009790|CSA6G013500|CSA7G006840|CSA6G031530|CSA1G016950|CSA2G004240|CSA4G025880|CSA3G020110|CSA3G015360|CSA2G034770|CSA4G006820|CSA6G015080|CSA2G015280|CSA6G004010|CSA3G013570|CSA2G009420|CSA7G021470|CSA5G028880|CSA2G007280
51536	0.00074324	0.014595	14	70	0.2	1037	13522	iron-sulfur cluster binding	CSA4G003300|CSA2G031650|CSA3G019210|CSA6G040410|CSA4G017460|CSA3G019220|CSA1G042860|CSA1G036050|CSA1G041780|CSA7G004050|CSA1G041790|CSA3G018610|CSA7G033530|CSA5G040160
51540	0.00074324	0.014595	14	70	0.2	1037	13522	metal cluster binding	CSA4G003300|CSA2G031650|CSA3G019210|CSA6G040410|CSA4G017460|CSA3G019220|CSA1G042860|CSA1G036050|CSA1G041780|CSA7G004050|CSA1G041790|CSA3G018610|CSA7G033530|CSA5G040160
6650	0.00074324	0.014595	14	70	0.2	1037	13522	glycerophospholipid metabolic process	CSA6G041580|CSA4G001530|CSA3G048840|CSA1G004330|CSA1G017150|CSA1G017100|CSA2G013590|CSA3G008320|CSA5G029520|CSA1G007140|CSA1G011860|CSA6G049640|CSA3G044460|CSA5G023290
19318	0.00078365	0.015191	25	165	0.151515	1037	13522	hexose metabolic process	CSA3G021110|CSA5G004970|CSA1G037750|CSA2G034780|CSA4G037480|CSA7G005670|CSA3G036980|CSA3G009790|CSA6G013500|CSA7G006840|CSA6G031530|CSA1G016950|CSA2G004240|CSA4G025880|CSA3G020110|CSA3G015360|CSA2G034770|CSA4G006820|CSA6G015080|CSA2G015280|CSA6G004010|CSA3G013570|CSA7G021470|CSA5G028880|CSA2G007280
4372	0.00082037	0.015701	5	11	0.454545	1037	13522	glycine hydroxymethyltransferase activity	CSA1G010170|CSA6G044790|CSA3G002580|CSA4G028640|CSA2G030460
6066	0.00086104	0.016258	30	213	0.140845	1037	13522	alcohol metabolic process	CSA1G004330|CSA3G021110|CSA5G004970|CSA1G037750|CSA2G034780|CSA4G037480|CSA7G005670|CSA3G036980|CSA3G009790|CSA6G013500|CSA7G006840|CSA6G031530|CSA1G016950|CSA3G048980|CSA4G001530|CSA2G004240|CSA4G025880|CSA3G020110|CSA3G015360|CSA2G034770|CSA4G006820|CSA6G015080|CSA2G015280|CSA6G004010|CSA3G013570|CSA2G009420|CSA1G007140|CSA7G021470|CSA5G028880|CSA2G007280
9987	0.00087097	0.016258	443	5153	0.0859693	1037	13522	cellular process	CSA3G004330|CSA2G030460|CSA7G005670|CSA5G032120|CSA7G002280|CSA1G010690|CSA1G009350|CSA5G002940|CSA3G006740|CSA2G009510|CSA6G044520|CSA1G001970|CSA4G010070|CSA4G006920|CSA6G015080|CSA7G002270|CSA4G036670|CSA6G031300|CSA4G002690|CSA3G003360|CSA6G017030|CSA6G041580|CSA1G002970|CSA3G028200|CSA3G031970|CSA2G019570|CSA2G017270|CSA5G031490|CSA7G026150|CSA6G035930|CSA6G008680|CSA5G035850|CSA3G028450|CSA…
44249	0.00091419	0.016857	130	1305	0.0996169	1037	13522	cellular biosynthetic process	CSA4G025950|CSA1G004330|CSA5G004970|CSA3G032880|CSA2G030460|CSA2G034780|CSA7G005670|CSA1G036050|CSA5G032120|CSA1G010170|CSA3G013840|CSA1G016950|CSA6G039830|CSA3G041590|CSA1G009350|CSA2G030610|CSA2G025420|CSA3G006740|CSA6G048960|CSA2G001110|CSA6G050640|CSA5G006620|CSA1G032890|CSA2G034770|CSA6G015080|CSA5G039570|CSA5G035370|CSA4G012090|CSA3G016820|CSA5G033620|CSA4G007220|CSA3G035520|CSA4G002690|CSA…
16740	0.0010153	0.018496	189	2005	0.0942643	1037	13522	transferase activity	CSA6G018460|CSA3G001220|CSA7G023530|CSA4G025670|CSA1G004330|CSA3G021110|CSA3G007200|CSA2G030460|CSA3G022600|CSA2G034780|CSA6G031280|CSA3G038470|CSA4G032480|CSA5G032120|CSA7G006640|CSA1G010170|CSA3G015500|CSA1G016950|CSA4G034540|CSA5G033210|CSA1G042840|CSA6G001350|CSA4G030100|CSA1G009350|CSA6G049370|CSA3G050100|CSA1G007950|CSA6G016450|CSA3G006740|CSA5G006620|CSA1G032890|CSA2G034770|CSA4G006920|CSA…
34637	0.0011406	0.02051	24	160	0.15	1037	13522	cellular carbohydrate biosynthetic process	CSA4G025880|CSA5G004970|CSA1G032890|CSA3G015360|CSA2G034770|CSA3G038290|CSA2G034780|CSA4G006820|CSA1G034040|CSA6G015080|CSA2G015280|CSA1G022900|CSA7G005670|CSA3G036980|CSA6G013500|CSA7G006840|CSA6G031530|CSA6G004010|CSA1G016950|CSA3G013570|CSA7G008370|CSA4G032820|CSA7G021470|CSA5G028880
46394	0.0011666	0.02051	30	217	0.138249	1037	13522	carboxylic acid biosynthetic process	CSA4G025950|CSA2G003300|CSA6G044790|CSA5G023610|CSA5G024880|CSA4G028640|CSA2G030460|CSA3G019470|CSA7G030560|CSA2G016630|CSA3G013840|CSA3G040860|CSA3G041590|CSA6G048760|CSA6G048980|CSA1G000160|CSA6G023960|CSA2G025420|CSA6G048960|CSA5G006620|CSA3G035070|CSA7G026160|CSA1G041340|CSA7G026240|CSA5G039900|CSA3G016820|CSA3G040230|CSA5G030130|CSA6G014760|CSA1G009540
16053	0.0011666	0.02051	30	217	0.138249	1037	13522	organic acid biosynthetic process	CSA4G025950|CSA2G003300|CSA6G044790|CSA5G023610|CSA5G024880|CSA4G028640|CSA2G030460|CSA3G019470|CSA7G030560|CSA2G016630|CSA3G013840|CSA3G040860|CSA3G041590|CSA6G048760|CSA6G048980|CSA1G000160|CSA6G023960|CSA2G025420|CSA6G048960|CSA5G006620|CSA3G035070|CSA7G026160|CSA1G041340|CSA7G026240|CSA5G039900|CSA3G016820|CSA3G040230|CSA5G030130|CSA6G014760|CSA1G009540
48037	0.0012156	0.021127	41	327	0.125382	1037	13522	cofactor binding	CSA6G044790|CSA6G051820|CSA5G023350|CSA4G028640|CSA1G028400|CSA2G030460|CSA3G022600|CSA7G000410|CSA4G037480|CSA4G030580|CSA5G033210|CSA5G003790|CSA3G044400|CSA6G012670|CSA3G043770|CSA3G041150|CSA3G028450|CSA3G011920|CSA5G002940|CSA3G003010|CSA6G016450|CSA1G036610|CSA2G030530|CSA3G020110|CSA2G019560|CSA3G015360|CSA3G004700|CSA4G035660|CSA7G029770|CSA6G036810|CSA7G001060|CSA5G039900|CSA7G006690|CSA…
6333	0.0012565	0.021589	7	23	0.304348	1037	13522	chromatin assembly or disassembly	CSA6G017030|CSA6G017040|CSA6G017120|CSA6G017110|CSA1G012840|CSA5G028660|CSA6G017050
8168	0.0013195	0.022416	29	209	0.138756	1037	13522	methyltransferase activity	CSA6G018460|CSA6G044790|CSA4G028640|CSA1G004330|CSA5G010380|CSA7G031380|CSA2G030460|CSA2G001520|CSA5G010870|CSA1G010170|CSA7G001370|CSA5G008400|CSA6G001350|CSA2G013820|CSA3G004020|CSA3G040460|CSA2G003590|CSA5G032900|CSA3G027600|CSA3G002580|CSA2G036010|CSA5G030690|CSA5G013990|CSA1G007140|CSA3G041040|CSA3G027790|CSA1G010620|CSA1G042250|CSA1G029250
6546	0.0016961	0.026326	3	4	0.75	1037	13522	glycine catabolic process	CSA2G025570|CSA3G049390|CSA1G010620
9071	0.0016961	0.026326	3	4	0.75	1037	13522	serine family amino acid catabolic process	CSA2G025570|CSA3G049390|CSA1G010620
42132	0.0016961	0.026326	3	4	0.75	1037	13522	fructose 1,6-bisphosphate 1-phosphatase activity	CSA7G006840|CSA6G004010|CSA4G025880
8184	0.0016961	0.026326	3	4	0.75	1037	13522	glycogen phosphorylase activity	CSA6G016450|CSA5G033210|CSA4G008840
44454	0.0016578	0.026326	7	24	0.291667	1037	13522	nuclear chromosome part	CSA6G053180|CSA7G029940|CSA6G051630|CSA3G032880|CSA7G000210|CSA2G003500|CSA2G010800
6790	0.0015717	0.026326	16	92	0.173913	1037	13522	sulfur metabolic process	CSA6G041580|CSA6G048960|CSA3G048610|CSA2G031240|CSA6G036890|CSA3G019470|CSA1G042860|CSA1G036050|CSA1G010690|CSA5G030130|CSA5G013990|CSA3G045740|CSA1G011860|CSA3G005340|CSA3G044460|CSA2G007280
32787	0.0016475	0.026326	29	212	0.136792	1037	13522	monocarboxylic acid metabolic process	CSA4G025950|CSA5G023610|CSA6G048970|CSA2G016630|CSA7G005670|CSA6G013500|CSA7G006840|CSA1G016950|CSA3G040860|CSA5G035850|CSA2G002080|CSA1G000160|CSA6G023960|CSA2G025420|CSA3G002580|CSA4G025880|CSA4G000560|CSA6G044520|CSA5G006620|CSA3G015360|CSA1G038260|CSA5G036360|CSA2G015280|CSA7G026160|CSA1G041340|CSA7G026240|CSA6G004010|CSA7G021470|CSA5G028880
16758	0.0017063	0.026326	37	292	0.126712	1037	13522	transferase activity, transferring hexosyl groups	CSA2G031510|CSA4G025670|CSA3G048610|CSA1G031470|CSA2G034780|CSA4G032480|CSA5G032120|CSA7G006640|CSA3G036980|CSA6G052080|CSA7G006620|CSA6G031530|CSA5G033210|CSA7G008160|CSA4G032820|CSA3G043470|CSA5G001510|CSA6G016450|CSA3G030550|CSA4G008840|CSA1G032890|CSA2G034770|CSA6G001530|CSA4G006820|CSA5G033150|CSA3G036280|CSA7G003260|CSA2G011150|CSA2G017550|CSA1G015630|CSA6G037520|CSA5G039400|CSA3G034970|CSA…
34641	0.0016695	0.026326	136	1396	0.0974212	1037	13522	cellular nitrogen compound metabolic process	CSA1G004330|CSA3G021110|CSA5G004970|CSA3G032880|CSA2G030460|CSA2G034780|CSA1G036050|CSA1G010170|CSA3G013840|CSA1G016950|CSA6G039830|CSA3G041590|CSA5G030500|CSA1G009350|CSA5G002940|CSA2G030610|CSA6G048960|CSA2G001110|CSA4G023760|CSA6G050640|CSA6G036680|CSA2G034770|CSA5G039570|CSA5G035370|CSA4G012090|CSA1G011490|CSA3G016820|CSA5G033620|CSA4G007220|CSA3G046930|CSA3G035520|CSA1G029250|CSA2G025570|CSA…
16628	0.0018733	0.026975	4	8	0.5	1037	13522	oxidoreductase activity, acting on the CH-CH group of donors, NAD or NADP as acceptor	CSA2G003300|CSA1G002370|CSA3G016820|CSA4G033870
42126	0.0018733	0.026975	4	8	0.5	1037	13522	nitrate metabolic process	CSA5G023350|CSA1G013880|CSA5G023370|CSA5G040160
42128	0.0018733	0.026975	4	8	0.5	1037	13522	nitrate assimilation	CSA5G023350|CSA1G013880|CSA5G023370|CSA5G040160
5977	0.0018733	0.026975	4	8	0.5	1037	13522	glycogen metabolic process	CSA3G036980|CSA6G031530|CSA3G013570|CSA6G015080
5978	0.0018733	0.026975	4	8	0.5	1037	13522	glycogen biosynthetic process	CSA3G036980|CSA6G031530|CSA3G013570|CSA6G015080
6112	0.0018733	0.026975	4	8	0.5	1037	13522	energy reserve metabolic process	CSA3G036980|CSA6G031530|CSA3G013570|CSA6G015080
16859	0.0018679	0.026975	8	31	0.258065	1037	13522	cis-trans isomerase activity	CSA6G007990|CSA3G038300|CSA2G003530|CSA1G006440|CSA3G010660|CSA3G042370|CSA7G000820|CSA3G006070
44238	0.002099	0.02994	363	4188	0.0866762	1037	13522	primary metabolic process	CSA7G023530|CSA1G005660|CSA1G004330|CSA3G021110|CSA2G030460|CSA1G036040|CSA7G005670|CSA5G032120|CSA7G005790|CSA7G002280|CSA3G013840|CSA5G033210|CSA6G039830|CSA5G029520|CSA4G030100|CSA5G030500|CSA1G009350|CSA3G044460|CSA5G002940|CSA2G003530|CSA1G007950|CSA5G000640|CSA2G003410|CSA2G025420|CSA3G006740|CSA2G001110|CSA3G047730|CSA6G044520|CSA5G006620|CSA6G036680|CSA4G006920|CSA3G031160|CSA6G015080|CSA…
51537	0.0021521	0.03041	7	25	0.28	1037	13522	2 iron, 2 sulfur cluster binding	CSA1G041780|CSA7G004050|CSA1G041790|CSA3G019210|CSA4G017460|CSA3G019220|CSA5G040160
6566	0.0023258	0.032561	8	32	0.25	1037	13522	threonine metabolic process	CSA2G025570|CSA5G039900|CSA3G047640|CSA5G024880|CSA3G015360|CSA6G008710|CSA7G002750|CSA1G010620
6739	0.0025539	0.035426	10	47	0.212766	1037	13522	NADP metabolic process	CSA3G009790|CSA7G006840|CSA6G004010|CSA2G004240|CSA4G025880|CSA1G037750|CSA7G021470|CSA6G034080|CSA2G007280|CSA2G015280
413	0.0027528	0.037838	7	26	0.269231	1037	13522	protein peptidyl-prolyl isomerization	CSA6G007990|CSA2G003530|CSA1G006440|CSA3G010660|CSA3G042370|CSA7G000820|CSA3G006070
9066	0.0028072	0.038158	17	106	0.160377	1037	13522	aspartate family amino acid metabolic process	CSA2G025570|CSA6G023960|CSA3G047640|CSA5G024880|CSA3G015360|CSA6G008710|CSA7G002750|CSA3G019470|CSA3G004920|CSA6G012710|CSA5G039900|CSA3G016820|CSA5G013990|CSA1G009540|CSA3G027790|CSA1G010620|CSA1G029250
44106	0.0028265	0.038158	51	448	0.113839	1037	13522	cellular amine metabolic process	CSA6G014060|CSA6G044790|CSA1G004330|CSA2G030460|CSA7G003960|CSA7G002750|CSA3G019470|CSA6G012710|CSA3G013840|CSA3G040860|CSA3G041590|CSA6G048760|CSA3G045350|CSA5G002940|CSA6G023960|CSA6G048960|CSA4G023760|CSA3G004920|CSA1G011490|CSA3G016820|CSA3G040230|CSA5G033620|CSA5G013990|CSA1G009540|CSA3G027790|CSA1G029250|CSA2G025570|CSA2G003300|CSA3G047640|CSA5G024880|CSA4G028640|CSA3G028840|CSA6G008710|CSA…
51186	0.0030221	0.04042	34	271	0.125461	1037	13522	cofactor metabolic process	CSA1G002370|CSA3G028840|CSA7G031380|CSA1G037750|CSA6G036890|CSA6G039120|CSA7G005670|CSA3G009790|CSA7G006840|CSA4G033870|CSA3G040860|CSA5G035850|CSA2G004240|CSA4G025880|CSA4G000560|CSA6G050640|CSA6G044520|CSA2G031240|CSA3G015360|CSA6G034080|CSA5G036360|CSA2G015280|CSA7G026240|CSA6G013410|CSA6G004010|CSA5G033620|CSA4G007220|CSA1G041840|CSA5G025230|CSA7G021470|CSA5G028880|CSA4G031720|CSA4G011730|CSA…
46483	0.0030476	0.04042	44	375	0.117333	1037	13522	heterocycle metabolic process	CSA2G003300|CSA1G002370|CSA2G003460|CSA1G000690|CSA7G031380|CSA2G032160|CSA6G039120|CSA1G036050|CSA1G010170|CSA4G033870|CSA1G016950|CSA4G005570|CSA3G040860|CSA6G004680|CSA3G041590|CSA1G009350|CSA1G010750|CSA6G048980|CSA3G045350|CSA6G042080|CSA2G028630|CSA6G023960|CSA3G002580|CSA2G030530|CSA2G001110|CSA4G000560|CSA4G023760|CSA6G050640|CSA5G020010|CSA6G002740|CSA3G004920|CSA1G038260|CSA5G036360|CSA…
16853	0.0033432	0.043956	22	154	0.142857	1037	13522	isomerase activity	CSA3G022160|CSA2G003530|CSA1G006440|CSA2G004240|CSA1G005660|CSA6G036680|CSA5G004970|CSA1G037750|CSA7G000820|CSA6G007990|CSA3G038300|CSA7G033600|CSA3G010660|CSA5G005570|CSA4G005770|CSA5G026140|CSA5G027020|CSA3G042370|CSA5G010920|CSA1G010930|CSA3G006070|CSA5G025390

## Sheet: KEGG_um
Table 3d The KEGG enrichment analysis of up-memory genes
#Term	Database	ID	Input number	Background number	ratio	P-Value	qvalue	Input	Hyperlink
Ribosome	KEGG PATHWAY	csv03010	40	317	0.126183	1.8127e-51	2.17524e-50	CsaV3_5G032570|CsaV3_6G021530|CsaV3_3G003150|CsaV3_6G007430|CsaV3_6G002760|CsaV3_5G023800|CsaV3_5G005100|CsaV3_4G011790|CsaV3_4G032310|CsaV3_6G034270|CsaV3_3G012060|CsaV3_5G005450|CsaV3_7G008490|CsaV3_5G008790|CsaV3_1G014820|CsaV3_6G002550|CsaV3_5G030340|CsaV3_4G004050|CsaV3_6G051000|CsaV3_2G011490|CsaV3_5G026230|CsaV3_5G039260|CsaV3_5G001000|CsaV3_7G001960|CsaV3_3G026840|CsaV3_6G046990|CsaV3_3G0…	http://www.genome.jp/kegg-bin/show_pathway?csv03010/csv:101212211%09red/csv:101216265%09red/csv:101217711%09red/csv:101219899%09red/csv:101203706%09red/csv:101213553%09red/csv:101218399%09red/csv:101206533%09red/csv:101216482%09red/csv:101215990%09red/csv:101205570%09red/csv:101213765%09red/csv:101208088%09red/csv:101205192%09red/csv:101205193%09red/csv:101208040%09red/csv:101216990%09red/csv:101…
Ribosome biogenesis in eukaryotes	KEGG PATHWAY	csv03008	6	86	0.0697674	9.90044e-07	5.94027e-06	CsaV3_4G013280|CsaV3_1G005920|CsaV3_2G025380|CsaV3_3G040270|CsaV3_2G002790|CsaV3_1G006340	http://www.genome.jp/kegg-bin/show_pathway?csv03008/csv:101221716%09red/csv:101208691%09red/csv:101221227%09red/csv:101222939%09red/csv:101222784%09red/csv:101219867%09red

## Sheet: KEGG_dm
Table 3e The KEGG enrichment analysis of down-memory genes
#Term	Database	ID	Input number	Background number	ratio	P-Value	qvalue	Input	Hyperlink
Protein processing in endoplasmic reticulum	KEGG PATHWAY	csv04141	8	163	0.0490798	3.20252e-06	6.72529e-05	CsaV3_3G006720|CsaV3_5G026520|CsaV3_1G044020|CsaV3_5G008690|CsaV3_5G026450|CsaV3_4G025150|CsaV3_1G035820|CsaV3_1G035830	http://www.genome.jp/kegg-bin/show_pathway?csv04141/csv:101212648%09red/csv:101211667%09red/csv:101210925%09red/csv:101211905%09red/csv:101204421%09red/csv:101217071%09red/csv:101205422%09red/csv:101211633%09red
Endocytosis	KEGG PATHWAY	csv04144	4	140	0.0285714	0.00689821	0.0724313	CsaV3_5G026450|CsaV3_2G006790|CsaV3_1G045850|CsaV3_5G026520	http://www.genome.jp/kegg-bin/show_pathway?csv04144/csv:101220522%09red/csv:101214261%09red/csv:101210925%09red/csv:101211905%09red
Glycerophospholipid metabolism	KEGG PATHWAY	csv00564	3	85	0.0352941	0.0110159	0.0771111	CsaV3_2G006790|CsaV3_1G006010|CsaV3_4G001340	http://www.genome.jp/kegg-bin/show_pathway?csv00564/csv:101220522%09red/csv:101222932%09red/csv:101218579%09red

## Sheet: KEGG_ud
Table 3f The KEGG enrichment analysis of up-down genes
#Term	Database	ID	Input number	Background number	ratio	P-Value	qvalue	Input	Hyperlink
Proteasome	KEGG PATHWAY	csv03050	40	48	0.833333	7.61041e-25	8.06703e-23	CsaV3_6G006240|CsaV3_4G006830|CsaV3_2G028900|CsaV3_4G032560|CsaV3_7G034340|CsaV3_2G011480|CsaV3_6G013170|CsaV3_4G025590|CsaV3_4G034160|CsaV3_1G046270|CsaV3_2G029040|CsaV3_3G009670|CsaV3_2G017820|CsaV3_3G000690|CsaV3_3G013100|CsaV3_6G031560|CsaV3_6G032330|CsaV3_5G037190|CsaV3_6G021700|CsaV3_7G003090|CsaV3_2G008010|CsaV3_5G030400|CsaV3_2G006720|CsaV3_1G029620|CsaV3_3G000720|CsaV3_2G029050|CsaV3_6G0…	http://www.genome.jp/kegg-bin/show_pathway?csv03050/csv:101218171%09red/csv:101215578%09red/csv:101212869%09red/csv:101208696%09red/csv:101212741%09red/csv:101205528%09red/csv:101210367%09red/csv:101215076%09red/csv:101207684%09red/csv:101208086%09red/csv:101217295%09red/csv:101212516%09red/csv:101219417%09red/csv:101212349%09red/csv:101213742%09red/csv:101206046%09red/csv:101214977%09red/csv:101…
Plant-pathogen interaction	KEGG PATHWAY	csv04626	29	126	0.230159	1.42445e-07	7.54957e-06	CsaV3_6G050560|CsaV3_6G051540|CsaV3_1G005040|CsaV3_6G013210|CsaV3_5G038130|CsaV3_4G003590|CsaV3_3G032970|CsaV3_1G001870|CsaV3_2G029630|CsaV3_2G007530|CsaV3_3G015240|CsaV3_3G028050|CsaV3_1G002910|CsaV3_4G011890|CsaV3_6G047100|CsaV3_1G004720|CsaV3_4G027710|CsaV3_5G038390|CsaV3_3G042240|CsaV3_5G035130|CsaV3_4G006200|CsaV3_3G012800|CsaV3_7G003380|CsaV3_3G040820|CsaV3_6G003730|CsaV3_3G010840|CsaV3_3G0…	http://www.genome.jp/kegg-bin/show_pathway?csv04626/csv:101203607%09red/csv:101219180%09red/csv:101205651%09red/csv:101216389%09red/csv:101208369%09red/csv:101215403%09red/csv:101208990%09red/csv:101213932%09red/csv:101205428%09red/csv:101217969%09red/csv:101221901%09red/csv:101211635%09red/csv:101222854%09red/csv:101205441%09red/csv:101214428%09red/csv:101203560%09red/csv:101215903%09red/csv:101…
Protein processing in endoplasmic reticulum	KEGG PATHWAY	csv04141	24	163	0.147239	0.000827953	0.0224289	CsaV3_2G029630|CsaV3_5G034230|CsaV3_4G033770|CsaV3_3G002780|CsaV3_5G008680|CsaV3_5G008760|CsaV3_7G008470|CsaV3_5G001960|CsaV3_6G039850|CsaV3_3G041940|CsaV3_3G035900|CsaV3_4G002420|CsaV3_7G029830|CsaV3_4G004150|CsaV3_5G008750|CsaV3_5G028000|CsaV3_4G035900|CsaV3_5G000040|CsaV3_3G002770|CsaV3_7G008210|CsaV3_1G009950|CsaV3_7G024760|CsaV3_3G027480|CsaV3_4G025700	http://www.genome.jp/kegg-bin/show_pathway?csv04141/csv:101203607%09red/csv:101203114%09red/csv:101210285%09red/csv:101222781%09red/csv:101219106%09red/csv:101219394%09red/csv:101207554%09red/csv:101210531%09red/csv:101220491%09red/csv:101214749%09red/csv:101211457%09red/csv:101212307%09red/csv:101220930%09red/csv:101211205%09red/csv:101220994%09red/csv:101219346%09red/csv:101206686%09red/csv:101…
Glutathione metabolism	KEGG PATHWAY	csv00480	15	79	0.189873	0.000846375	0.0224289	CsaV3_4G025690|CsaV3_4G007700|CsaV3_4G025770|CsaV3_1G005440|CsaV3_4G025650|CsaV3_5G023890|CsaV3_4G025760|CsaV3_7G029060|CsaV3_4G025750|CsaV3_3G028000|CsaV3_1G004150|CsaV3_3G011450|CsaV3_3G011460|CsaV3_1G005420|CsaV3_4G025680	http://www.genome.jp/kegg-bin/show_pathway?csv00480/csv:101213782%09red/csv:101218987%09red/csv:105435246%09red/csv:101203519%09red/csv:101212743%09red/csv:101214992%09red/csv:101215747%09red/csv:101217848%09red/csv:101217418%09red/csv:101212291%09red/csv:101207634%09red/csv:101207387%09red/csv:101220464%09red/csv:101214027%09red
Phenylpropanoid biosynthesis	KEGG PATHWAY	csv00940	24	167	0.143713	0.00111615	0.0236624	CsaV3_7G031620|CsaV3_7G006370|CsaV3_6G039700|CsaV3_3G046050|CsaV3_6G013150|CsaV3_1G040750|CsaV3_6G032510|CsaV3_4G023620|CsaV3_5G005000|CsaV3_3G032850|CsaV3_4G023640|CsaV3_6G039690|CsaV3_3G035690|CsaV3_4G029960|CsaV3_7G031610|CsaV3_4G036360|CsaV3_6G039710|CsaV3_7G005720|CsaV3_7G008380|CsaV3_6G043930|CsaV3_3G032840|CsaV3_6G039680|CsaV3_3G043060|CsaV3_6G039720	http://www.genome.jp/kegg-bin/show_pathway?csv00940/csv:101205510%09red/csv:101202852%09red/csv:101211842%09red/csv:101208932%09red/csv:101206860%09red/csv:101215428%09red/csv:101213170%09red/csv:101221846%09red/csv:101202984%09red/csv:101223112%09red/csv:101217543%09red/csv:101202924%09red/csv:101219091%09red/csv:101222092%09red/csv:101218121%09red/csv:101218361%09red/csv:101217567%09red/csv:101…

## Sheet: KEGG_du
Table 3g The KEGG enrichment analysis of down-up genes
#Term	Database	ID	Input number	Background number	ratio	P-Value	qvalue	Input	Hyperlink
Metabolic pathways	KEGG PATHWAY	csv01100	254	1996	0.127255	4.5427e-16	4.86069e-14	CsaV3_3G020110|CsaV3_2G015280|CsaV3_2G030460|CsaV3_3G041150|CsaV3_7G021470|CsaV3_3G034100|CsaV3_5G006680|CsaV3_3G043770|CsaV3_1G010620|CsaV3_6G031760|CsaV3_3G015360|CsaV3_3G031580|CsaV3_6G039090|CsaV3_3G007050|CsaV3_6G015080|CsaV3_5G024880|CsaV3_4G006540|CsaV3_2G003300|CsaV3_3G015560|CsaV3_3G028450|CsaV3_2G017550|CsaV3_1G002840|CsaV3_3G011480|CsaV3_1G017150|CsaV3_3G018610|CsaV3_5G039350|CsaV3_5G0…	http://www.genome.jp/kegg-bin/show_pathway?csv01100/csv:101214927%09red/csv:101222061%09red/csv:101222060%09red/csv:101213690%09red/csv:101222275%09red/csv:101215287%09red/csv:101218156%09red/csv:101210209%09red/csv:101221226%09red/csv:101217416%09red/csv:101203342%09red/csv:101214374%09red/csv:101205061%09red/csv:101207762%09red/csv:101214408%09red/csv:101209155%09red/csv:101208634%09red/csv:101…
Photosynthesis - antenna proteins	KEGG PATHWAY	csv00196	17	18	0.944444	2.3583e-11	1.26169e-09	CsaV3_1G002410|CsaV3_7G002620|CsaV3_3G005950|CsaV3_1G043710|CsaV3_1G005600|CsaV3_5G025740|CsaV3_1G041230|CsaV3_1G032510|CsaV3_6G051520|CsaV3_6G051530|CsaV3_2G027790|CsaV3_6G013800|CsaV3_5G039350|CsaV3_3G031580|CsaV3_4G026100|CsaV3_6G005340|CsaV3_5G030270	http://www.genome.jp/kegg-bin/show_pathway?csv00196/csv:101211276%09red/csv:101204705%09red/csv:101213845%09red/csv:101218675%09red/csv:101222701%09red/csv:101207278%09red/csv:101219846%09red/csv:101218137%09red/csv:101208740%09red/csv:101222687%09red/csv:101211428%09red/csv:101212963%09red/csv:101221671%09red/csv:101203342%09red/csv:101211430%09red/csv:101202993%09red/csv:101214055%09red
Biosynthesis of secondary metabolites	KEGG PATHWAY	csv01110	135	970	0.139175	4.25293e-11	1.51688e-09	CsaV3_2G015280|CsaV3_2G030460|CsaV3_3G041150|CsaV3_7G021470|CsaV3_1G010620|CsaV3_6G031760|CsaV3_3G015360|CsaV3_6G039090|CsaV3_6G015080|CsaV3_5G024880|CsaV3_4G004870|CsaV3_2G003300|CsaV3_3G028450|CsaV3_2G017550|CsaV3_1G002840|CsaV3_3G011480|CsaV3_5G030130|CsaV3_6G048980|CsaV3_6G023960|CsaV3_7G026280|CsaV3_3G035070|CsaV3_5G025230|CsaV3_5G033210|CsaV3_4G030790|CsaV3_4G033870|CsaV3_1G010780|CsaV3_5G0…	http://www.genome.jp/kegg-bin/show_pathway?csv01110/csv:101222061%09red/csv:101222060%09red/csv:101215287%09red/csv:101218156%09red/csv:101210209%09red/csv:101209833%09red/csv:101214374%09red/csv:101219336%09red/csv:101205228%09red/csv:101218095%09red/csv:101222699%09red/csv:101218716%09red/csv:101204323%09red/csv:101207518%09red/csv:101206118%09red/csv:101202861%09red/csv:101212831%09red/csv:101…
Photosynthesis	KEGG PATHWAY	csv00195	28	70	0.4	5.75267e-11	1.53884e-09	CsaV3_3G025000|CsaV3_7G004300|CsaV3_3G000770|CsaV3_3G019210|CsaV3_2G032160|CsaV3_6G002740|CsaV3_3G046150|CsaV3_1G046680|CsaV3_6G052210|CsaV3_3G013420|CsaV3_7G027520|CsaV3_3G022840|CsaV3_7G004050|CsaV3_5G026220|CsaV3_6G042680|CsaV3_2G025120|CsaV3_3G019220|CsaV3_6G041600|CsaV3_1G010750|CsaV3_3G008130|CsaV3_2G009680|CsaV3_4G007520|CsaV3_1G011330|CsaV3_4G007600|CsaV3_1G015100|CsaV3_2G010090|CsaV3_3G0…	http://www.genome.jp/kegg-bin/show_pathway?csv00195/csv:101218641%09red/csv:101211484%09red/csv:101215781%09red/csv:101214094%09red/csv:101215878%09red/csv:101209832%09red/csv:101206477%09red/csv:101214408%09red/csv:101208674%09red/csv:101203850%09red/csv:101209111%09red/csv:101204833%09red/csv:101221828%09red/csv:101205582%09red/csv:101209135%09red/csv:101215480%09red/csv:101203080%09red/csv:101…
Glyoxylate and dicarboxylate metabolism	KEGG PATHWAY	csv00630	22	63	0.349206	4.6995e-08	1.00569e-06	CsaV3_2G030460|CsaV3_6G039090|CsaV3_3G043770|CsaV3_3G049390|CsaV3_3G015360|CsaV3_3G002580|CsaV3_6G044790|CsaV3_1G043170|CsaV3_6G051820|CsaV3_2G025570|CsaV3_5G004640|CsaV3_5G034360|CsaV3_7G030560|CsaV3_3G013840|CsaV3_1G010620|CsaV3_3G040230|CsaV3_7G001060|CsaV3_7G032950|CsaV3_1G044450|CsaV3_6G044520|CsaV3_5G031220|CsaV3_4G028640	http://www.genome.jp/kegg-bin/show_pathway?csv00630/csv:101213413%09red/csv:101222060%09red/csv:101215287%09red/csv:101219252%09red/csv:101220634%09red/csv:101209132%09red/csv:101217746%09red/csv:101222240%09red/csv:101222497%09red/csv:101222346%09red/csv:101222345%09red/csv:101203992%09red/csv:101219300%09red/csv:101209186%09red/csv:101209820%09red/csv:101217893%09red/csv:101222823%09red/csv:101…
Carbon fixation in photosynthetic organisms	KEGG PATHWAY	csv00710	21	63	0.333333	1.79798e-07	3.2064e-06	CsaV3_6G044520|CsaV3_3G030440|CsaV3_3G020110|CsaV3_7G021470|CsaV3_3G001220|CsaV3_4G025880|CsaV3_2G004240|CsaV3_6G004010|CsaV3_7G006840|CsaV3_6G013500|CsaV3_2G015280|CsaV3_5G034360|CsaV3_1G005660|CsaV3_5G028880|CsaV3_1G037750|CsaV3_3G009790|CsaV3_5G031220|CsaV3_4G037480|CsaV3_5G008880|CsaV3_5G035850|CsaV3_7G005670	http://www.genome.jp/kegg-bin/show_pathway?csv00710/csv:101204323%09red/csv:101202856%09red/csv:101208330%09red/csv:101219252%09red/csv:101216256%09red/csv:101205112%09red/csv:101220055%09red/csv:101215805%09red/csv:101208202%09red/csv:101205576%09red/csv:101211927%09red/csv:101219300%09red/csv:101220645%09red/csv:101211170%09red/csv:101209723%09red/csv:101206118%09red/csv:101219476%09red/csv:101…
Carbon metabolism	KEGG PATHWAY	csv01200	41	221	0.18552	7.39218e-07	1.12995e-05	CsaV3_3G020110|CsaV3_2G015280|CsaV3_2G030460|CsaV3_6G039090|CsaV3_3G043770|CsaV3_3G049390|CsaV3_6G031760|CsaV3_5G028880|CsaV3_3G015360|CsaV3_2G003650|CsaV3_3G009790|CsaV3_7G005670|CsaV3_6G013500|CsaV3_6G044790|CsaV3_1G043170|CsaV3_5G035850|CsaV3_6G004010|CsaV3_6G051820|CsaV3_2G025570|CsaV3_5G030130|CsaV3_5G034360|CsaV3_1G037750|CsaV3_3G001220|CsaV3_2G004240|CsaV3_1G010620|CsaV3_7G006840|CsaV3_7G0…	http://www.genome.jp/kegg-bin/show_pathway?csv01200/csv:101222060%09red/csv:101208699%09red/csv:101215287%09red/csv:101202856%09red/csv:101211927%09red/csv:101205576%09red/csv:101216623%09red/csv:101214374%09red/csv:101219252%09red/csv:101208202%09red/csv:101209132%09red/csv:101221775%09red/csv:101206118%09red/csv:101219476%09red/csv:101204323%09red/csv:101217746%09red/csv:101211996%09red/csv:101…
Porphyrin and chlorophyll metabolism	KEGG PATHWAY	csv00860	15	43	0.348837	6.42009e-06	8.58687e-05	CsaV3_2G030530|CsaV3_2G016730|CsaV3_4G031720|CsaV3_6G050640|CsaV3_1G002370|CsaV3_4G011730|CsaV3_3G014130|CsaV3_5G025230|CsaV3_3G011480|CsaV3_6G013410|CsaV3_6G031220|CsaV3_4G033870|CsaV3_6G039120|CsaV3_7G031380|CsaV3_4G007220	http://www.genome.jp/kegg-bin/show_pathway?csv00860/csv:101222061%09red/csv:101218189%09red/csv:101213619%09red/csv:101208554%09red/csv:101221755%09red/csv:101220615%09red/csv:101219179%09red/csv:101208461%09red/csv:101202861%09red/csv:101217637%09red/csv:101209548%09red/csv:101217584%09red/csv:101206529%09red/csv:101208123%09red/csv:101219336%09red
Starch and sucrose metabolism	KEGG PATHWAY	csv00500	27	132	0.204545	1.23225e-05	0.0001465	CsaV3_3G036980|CsaV3_1G010740|CsaV3_1G032890|CsaV3_3G047730|CsaV3_2G011150|CsaV3_1G032200|CsaV3_6G015080|CsaV3_4G006540|CsaV3_4G032820|CsaV3_2G017550|CsaV3_4G004870|CsaV3_6G016450|CsaV3_5G035070|CsaV3_7G028580|CsaV3_UNG186450|CsaV3_3G021110|CsaV3_7G029570|CsaV3_1G022900|CsaV3_5G033210|CsaV3_7G003840|CsaV3_4G029230|CsaV3_4G008840|CsaV3_3G013570|CsaV3_6G031530|CsaV3_1G010960|CsaV3_3G038290|CsaV3_5G…	http://www.genome.jp/kegg-bin/show_pathway?csv00500/csv:101213690%09red/csv:101220298%09red/csv:101210586%09red/csv:101209588%09red/csv:101215687%09red/csv:101208819%09red/csv:101209136%09red/csv:101212615%09red/csv:101204159%09red/csv:101221746%09red/csv:101204478%09red/csv:101208942%09red/csv:101205766%09red/csv:101223071%09red/csv:101216247%09red/csv:101213925%09red/csv:101209451%09red/csv:101…
Sulfur metabolism	KEGG PATHWAY	csv00920	11	31	0.354839	9.64166e-05	0.00103166	CsaV3_3G044460|CsaV3_3G041150|CsaV3_6G048960|CsaV3_3G045740|CsaV3_1G011860|CsaV3_1G010690|CsaV3_6G049640|CsaV3_6G041580|CsaV3_1G013880|CsaV3_5G030130|CsaV3_1G042860	http://www.genome.jp/kegg-bin/show_pathway?csv00920/csv:101214065%09red/csv:101214714%09red/csv:101212851%09red/csv:101204881%09red/csv:101215869%09red/csv:101211864%09red/csv:101205596%09red/csv:101217416%09red/csv:101212119%09red/csv:101220567%09red/csv:101216623%09red
Glycine, serine and threonine metabolism	KEGG PATHWAY	csv00260	16	65	0.246154	0.000115702	0.00112546	CsaV3_6G044790|CsaV3_2G030460|CsaV3_5G002940|CsaV3_6G039090|CsaV3_1G043170|CsaV3_7G001060|CsaV3_1G010620|CsaV3_5G003790|CsaV3_3G015360|CsaV3_2G025570|CsaV3_3G049390|CsaV3_5G039900|CsaV3_5G031220|CsaV3_4G028640|CsaV3_7G032950|CsaV3_5G024880	http://www.genome.jp/kegg-bin/show_pathway?csv00260/csv:101209132%09red/csv:101217208%09red/csv:101222346%09red/csv:101202843%09red/csv:101215287%09red/csv:101222345%09red/csv:101222823%09red/csv:101222060%09red/csv:101222001%09red/csv:101213059%09red/csv:101209820%09red/csv:101207975%09red/csv:101220645%09red/csv:101217893%09red/csv:101217746%09red/csv:101222240%09red
One carbon pool by folate	KEGG PATHWAY	csv00670	8	16	0.5	0.000138262	0.00123283	CsaV3_6G044790|CsaV3_2G030460|CsaV3_1G001940|CsaV3_6G005120|CsaV3_1G010620|CsaV3_1G010170|CsaV3_3G002580|CsaV3_4G028640	http://www.genome.jp/kegg-bin/show_pathway?csv00670/csv:101222497%09red/csv:101206006%09red/csv:101215287%09red/csv:101222345%09red/csv:101211739%09red/csv:101209820%09red/csv:101222878%09red/csv:101222240%09red
Carotenoid biosynthesis	KEGG PATHWAY	csv00906	10	31	0.322581	0.000374566	0.00308297	CsaV3_3G038300|CsaV3_4G007560|CsaV3_6G040180|CsaV3_7G008610|CsaV3_1G034470|CsaV3_4G007180|CsaV3_4G002690|CsaV3_3G007050|CsaV3_2G016630|CsaV3_5G020340	http://www.genome.jp/kegg-bin/show_pathway?csv00906/csv:101219389%09red/csv:101212850%09red/csv:101209155%09red/csv:101216531%09red/csv:101220226%09red/csv:101215492%09red/csv:101214823%09red/csv:101206471%09red/csv:101212903%09red/csv:101204961%09red
Pentose phosphate pathway	KEGG PATHWAY	csv00030	12	45	0.266667	0.000437531	0.00334399	CsaV3_2G015280|CsaV3_7G021470|CsaV3_6G004010|CsaV3_2G004240|CsaV3_5G005570|CsaV3_1G005660|CsaV3_4G025880|CsaV3_2G007280|CsaV3_7G006840|CsaV3_2G003650|CsaV3_3G009790|CsaV3_1G037750	http://www.genome.jp/kegg-bin/show_pathway?csv00030/csv:101204323%09red/csv:101208699%09red/csv:101215805%09red/csv:101209451%09red/csv:101211927%09red/csv:101205576%09red/csv:101221775%09red/csv:101206118%09red/csv:101219476%09red/csv:101219871%09red/csv:101214374%09red/csv:101221375%09red
DNA replication	KEGG PATHWAY	csv03030	11	45	0.244444	0.00137483	0.00980709	CsaV3_6G053180|CsaV3_3G032880|CsaV3_7G029940|CsaV3_7G000210|CsaV3_6G051630|CsaV3_2G001260|CsaV3_5G035370|CsaV3_1G002970|CsaV3_6G008170|CsaV3_2G003500|CsaV3_5G039570	http://www.genome.jp/kegg-bin/show_pathway?csv03030/csv:101219064%09red/csv:101217274%09red/csv:101211850%09red/csv:101210889%09red/csv:101207583%09red/csv:101219775%09red/csv:101203146%09red/csv:101208545%09red/csv:101211822%09red/csv:101219546%09red/csv:101205315%09red
Thiamine metabolism	KEGG PATHWAY	csv00730	7	21	0.333333	0.00242686	0.0162296	CsaV3_2G031800|CsaV3_2G003460|CsaV3_1G036050|CsaV3_1G000690|CsaV3_6G005620|CsaV3_3G005340|CsaV3_6G004680	http://www.genome.jp/kegg-bin/show_pathway?csv00730/csv:101211553%09red/csv:101203230%09red/csv:101220427%09red/csv:101213554%09red/csv:101214927%09red/csv:101216714%09red/csv:101215517%09red
Nitrogen metabolism	KEGG PATHWAY	csv00910	9	37	0.243243	0.00377263	0.0237454	CsaV3_1G013890|CsaV3_5G023370|CsaV3_3G018610|CsaV3_3G037320|CsaV3_7G030560|CsaV3_3G013840|CsaV3_3G040230|CsaV3_3G042440|CsaV3_5G023350	http://www.genome.jp/kegg-bin/show_pathway?csv00910/csv:101214956%09red/csv:101213413%09red/csv:101213998%09red/csv:101219242%09red/csv:101219000%09red/csv:101217505%09red/csv:101212441%09red/csv:101214380%09red/csv:101209642%09red
