# Supplementary material for: Knockout CsRBOH5.1 causes global decrease of H3K4me3 on genes during recovery after cold stress acclimation, leading to acclimation failure
Source: Research Square preprint supplement (doi:10.21203/rs.3.rs-3226653/v1), 2023-08-03
Supplement: Supplementary file 10 [file Extended Data Table 4.xlsx]

## Sheet: Table 4a
Table 4a The expression of some key cold response genes.
	CsaV3_1G009900(ICE1-like)	CsaV3_2G014340(COR413PM2)	CsaV3_3G016760(CBF2)	CsaV3_3G027730(ICE1)	CsaV3_3G036940(CBF3)	CsaV3_5G003250(CBF1-like)	CsaV3_5G005890(CBF1)	CsaV3_6G042690(COR413PM2-like)	CsaV3_1G009900(ICE1-like)	CsaV3_2G014340(COR413PM2)	CsaV3_3G016760(CBF2)	CsaV3_3G027730(ICE1)	CsaV3_3G036940(CBF3)	CsaV3_5G003250(CBF1-like)	CsaV3_5G005890(CBF1)	CsaV3_6G042690(COR413PM2-like)
WT_CK_1	47.67	163.42	5.46	12.8	0	0	0	0.75	0.868238	2.50705	-0.236562	-0.898783	-0.235702	-0.493288	-0.513465	-1.02068
WT_CK_2	38.17	83.88	16.02	17.98	0	0	1.79	1.76	0.396129	-0.125822	0.461122	-0.458621	-0.235702	-0.493288	0.482552	0.128296
WT_CK_3	49.97	83.46	10.49	28.23	0	0	0	0.55	0.982538	-0.139724	0.0957627	0.412357	-0.235702	-0.493288	-0.513465	-1.2482
WT_R4h_1	29.87	158.24	4.17	30.71	0.22	0	1.1	2.16	-0.0163443	2.33559	-0.321791	0.623092	4.00694	-0.493288	0.0986125	0.583337
WT_R4h_2	21.64	79.69	52.91	37.05	0	0.48	7.05	2.4	-0.425339	-0.264516	2.89839	1.16182	-0.235702	1.73813	3.4094	0.856361
WT_R4h_3	31.48	86.85	41.3	32.2	0	0	3.52	1.59	0.0636656	-0.0275108	2.13133	0.749702	-0.235702	-0.493288	1.44518	-0.0650961
WT_R48h_1	64.03	48.12	0.51	22.13	0	0	0	1.96	1.68126	-1.30952	-0.563601	-0.105981	-0.235702	-0.493288	-0.513465	0.355817
WT_R48h_2	69.39	82.22	2.36	22.39	0	0	0.24	0.24	1.94763	-0.18077	-0.441375	-0.0838877	-0.235702	-0.493288	-0.379921	-1.60086
WT_R48h_3	54.15	79	20.7	35.19	0	0.25	0.56	1.37	1.19027	-0.287356	0.770323	1.00377	-0.235702	0.668909	-0.201862	-0.315368
Csrboh5.1_CK_1	12.88	75.39	0.15	23.76	0	0	0	2.89	-0.860673	-0.406851	-0.587386	0.032526	-0.235702	-0.493288	-0.513465	1.41379
Csrboh5.1_CK_2	20.99	88.42	0.7	39.25	0	0	0	1.96	-0.457641	0.0244581	-0.551048	1.34877	-0.235702	-0.493288	-0.513465	0.355817
Csrboh5.1_CK_3	13.21	109.42	0.54	25.2	0	0	0	1.15	-0.844273	0.719585	-0.561619	0.154888	-0.235702	-0.493288	-0.513465	-0.565641
Csrboh5.1_R4h_1	9.32	74.77	1.08	3.49	0	0	1.72	1.71	-1.03759	-0.427374	-0.525942	-1.68989	-0.235702	-0.493288	0.443602	0.0714161
Csrboh5.1_R4h_2	6.14	98.79	1.17	6.16	0	0.58	0	0.93	-1.19562	0.367718	-0.519996	-1.46301	-0.235702	2.20301	-0.513465	-0.815913
Csrboh5.1_R4h_3	8.28	68.06	2.01	7.4	0	0.6	0	2.33	-1.08927	-0.649483	-0.464499	-1.35764	-0.235702	2.29599	-0.513465	0.776729
Csrboh5.1_R48h_1	24.4	53.51	1.64	35.89	0	0	0.63	3.77	-0.288179	-1.13111	-0.488944	1.06325	-0.235702	-0.493288	-0.162912	2.41488
Csrboh5.1_R48h_2	35.54	65.23	1.52	33.77	0	0	0	0.88	0.26543	-0.74316	-0.496872	0.88311	-0.235702	-0.493288	-0.513465	-0.872793
Csrboh5.1_R48h_3	6.45	79.79	0	7.19	0	0	0	1.25	-1.18022	-0.261206	-0.597296	-1.37548	-0.235702	-0.493288	-0.513465	-0.451881

## Sheet: Table 4b
Table 4b The expression of differential cold response genes during recovery after CS-ACC
Plant type	Gene ID	CK_R4h_log2(FoldChange)	CK_R4h_FDR	CK_R48h_log2(FoldChange)	CK_R48h_FDR	R4h_R48h_log2(FoldChange)	R4h_R48h_FDR
WT	CsaV3_1G009900(ICE1-like)	-0.961005	0.00235	0.432958	0.456528	1.39383	1.34e-06
Csrboh5.1		-0.749654	0.0682479	0.515383	0.99525	1.26729	0.0954345
Csrboh5.1	CsaV3_3G027730(ICE1)	-2.135	7.92806e-10	-0.166974	0.997745	1.99108	0.0055977
