# Supplementary material for: Knockout CsRBOH5.1 causes global decrease of H3K4me3 on genes during recovery after cold stress acclimation, leading to acclimation failure
Source: Research Square preprint supplement (doi:10.21203/rs.3.rs-3226653/v1), 2023-08-03
Supplement: Supplementary file 13 [file Extended Data Table 5.xlsx]

## Sheet: Sheet1
Table 5 Summary of ChIP-Seq peaks
Sample name	Peak number	Common peak number
WT_CK_1_H3K4me3	19237	18732
WT_CK_2_H3K4me3	19099
WT_CK_3_H3K4me3	21665
WT_M4h_1_H3K4me3	18634	18404
WT_M4h_2_H3K4me3	18678
WT_M4h_3_H3K4me3	22337
WT_M48h_1_H3K4me3	18117	18022
WT_M48h_2_H3K4me3	18605
WT_M48h_3_H3K4me3	23001
WT_CK_1_H3K27me3	13565	11964
WT_CK_2_H3K27me3	13282
WT_M4h_1_H3K27me3	12477	11311
WT_M4h_2H3K27me3	12681
WT_M48h_1_H3K27me3	11873	10938
WT_M48h_2_H3K27me3	11921
Csrboha_CK_1_H3K4me3	17050	16926
Csrboha_CK_2_H3K4me3	17233
Csrboha_M4h_1_H3K4me3	17568	16755
Csrboha_M4h_2_H3K4me3	16778
Csrboha_M48h_1_H3K4me3	17412	16660
Csrboha_M48h_2_H3K4me3	16893
