# Supplementary material for: Knockout CsRBOH5.1 causes global decrease of H3K4me3 on genes during recovery after cold stress acclimation, leading to acclimation failure
Source: Research Square preprint supplement (doi:10.21203/rs.3.rs-3226653/v1), 2023-08-03
Supplement: Supplementary file 16 [file Extended Data Table 6.xlsx]

## Sheet: Table 6a
Table 6a The expression of histone methyltransferase “writers”, histone demethylase “erasers” and the histone modification “readers”genes
Gene type	writer							eraser											reader
Gene ID	CsaV3_2G018160	CsaV3_2G035180	CsaV3_3G019960	CsaV3_5G000290	CsaV3_6G003090	CsaV3_6G007140	CsaV3_7G003880	CsaV3_1G009200	CsaV3_1G037770	CsaV3_1G042600	CsaV3_2G006530	CsaV3_2G009730	CsaV3_3G001400	CsaV3_3G008010	CsaV3_3G048890	CsaV3_5G020020	CsaV3_6G049610	CsaV3_7G027020	CsaV3_3G011410	CsaV3_3G011420	CsaV3_4G013320	CsaV3_6G044600
WT_CK_1	6.11	9	13.46	4.31	23.83	6.52	23.14	11.03	23.98	68.72	22.85	9.35	17.34	35.88	3.28	18.48	19.41	10.02	46.25	9.12	32.58	31.05
WT_CK_2	10.6	9.61	10.93	6.12	31.66	5.37	22.14	15.37	20.79	73.46	18.96	10.34	16.72	55.95	2.12	18.78	21.96	17.97	44.3	44.58	48.78	22.61
WT_CK_3	11.15	7.65	11.84	4.01	31.55	6.8	23.03	15.66	24.77	55.2	21.7	10.52	24.7	49.98	3.36	17	23.41	16.17	47.36	43.82	51.02	23.62
WT_R4h_1	4.93	6.36	10.84	2.59	26.77	6.08	28.97	12.89	36.04	18.41	28.71	17.46	17.91	22.05	1.34	26.15	22.77	16.55	51.09	17.32	43.49	24.35
WT_R4h_2	9.86	7.71	9.08	1.9	36.08	5.77	25.43	14.94	29.66	28.62	24.63	15.87	11.63	28.38	1	24.31	27.37	19.1	45.3	20.23	66.82	17.03
WT_R4h_3	7.26	9.19	13.41	2.11	31.8	5.2	23.12	15.05	31.62	22.4	28.42	13.9	17.84	24.04	1.41	20.9	22.62	16.37	49.91	22.63	45.48	23.16
WT_R48h_1	13.83	9.26	10.41	9.21	24.84	7.95	18.29	14.3	19.77	200.35	14.65	7.04	16.15	40.34	1.28	20.43	20.7	12.52	71.32	0	44.76	36.45
WT_R48h_2	8.9	10	12.78	4.49	22.82	7.94	24.44	13.6	26.67	120.36	21.36	9.84	18.53	43.27	2.68	26.22	20.78	11.31	53.66	0	29.74	36.52
WT_R48h_3	11.19	9.19	10.87	4.47	25.16	8.74	19.41	16.06	20.89	99.14	19.87	10.02	17.77	42.06	2.03	19.01	20.17	12.75	50.93	23.27	55.62	27.93
Csrboh5.1_CK_1	7.73	5.67	4.16	1.9	7.6	2.39	19.67	6.04	17.63	40.74	18.52	11.17	14.22	11.92	0.26	34.33	17.8	11.87	18.05	63.82	33.43	10.72
Csrboh5.1_CK_2	9.01	5.6	4.39	2.4	11.39	3.49	17.33	5.96	13.62	45.28	16.15	10.47	11.4	7.67	0.1	25.19	16.6	13.53	18.7	76.78	51.18	15.79
Csrboh5.1_CK_3	4.22	4.3	3.78	1.61	11.54	1.94	15.35	4.48	10.09	33.89	17.55	6.69	7.73	6.02	0	31.32	13.31	13.6	15.16	98.59	36.5	20.17
Csrboh5.1_R4h_1	4.57	7.83	1.82	2.02	5.33	2.03	10.57	4.35	8.47	5.85	17	5.28	7.23	2.82	0.23	42.4	11.82	6.26	12.26	69.26	14.87	15.2
Csrboh5.1_R4h_2	4.96	8.25	3.92	1.55	5.5	2.18	11.74	5.11	16.29	9.46	16.69	6.39	7.1	7.25	0	39.4	10.12	5.12	15.67	67.26	20.41	13.65
Csrboh5.1_R4h_3	7.15	9.15	4.11	5.27	9.43	3.28	11.45	5.57	17.59	9.05	15.66	7.28	12.81	5.62	0.42	39.36	14.12	5.98	23.49	71.16	25.43	18.75
Csrboh5.1_R48h_1	4.03	3.68	4.58	0.74	9.11	2.28	15.27	6.51	10.33	69.79	12.34	7.5	6.15	5.72	0	37.93	15.58	12.74	11.81	104.92	33.55	26.56
Csrboh5.1_R48h_2	3.75	5.7	4.17	2.94	10.83	3.95	15.05	7.75	9.78	77.64	10.91	6.76	8.44	2.08	0	34.17	16.28	11.7	18.27	155.62	40.06	20.43
Csrboh5.1_R48h_3	5.13	3.85	6	1.73	9.03	3.34	14	6.29	14.01	43.72	14.85	12.08	5.74	6.47	0	47.3	17.57	9.75	23.96	87.96	27.55	11.8

## Sheet: Table 6b
Table 6a The expression of different histone methyltransferase “writers”, histone demethylase “erasers” and the histone modification “readers”genes during recovery after CS-ACC
Plant type	Gene type	Gene ID	CK_R4h_log2(FoldChange)	CK_R4h_FDR	CK_R48h_log2(FoldChange)	CK_R48h_FDR	R4h_R48h_log2(FoldChange)	R4h_R48h_FDR
WT	Writer	CsaV3_5G000290	-1.37428	0.0104262	0.303673	0.901122	1.6769	0.00395564
		CsaV3_6G007140	-0.392759	0.255232	0.35712	0.58329	0.750361	0.00545384
Csrboh5.1		CsaV3_2G035180	0.92891	0.0134482	-0.233086	0.997745	-1.14265	0.0101299
WT	eraser	CsaV3_1G042600	-1.76637	1.23e-10	1.1126	0.0181629	2.87677	3.47e-18
		CsaV3_3G008010	-1.16229	3.53e-05	-0.20495	0.845032	0.959275	1.01e-05
		CsaV3_3G048890	-1.48253	0.0080985	-0.578739	0.724833	0.903448	0.228117
Csrboh5.1		CsaV3_1G042600	-2.05855	1.11477e-12	0.6833	0.768833	2.76551	2.55384e-13
		CsaV3_7G027020	-0.938	0.0020841	-0.182073	0.997745	0.775399	0.0559462
Csrboh5.1	reader	CsaV3_4G013320	-0.76602	0.0328171	-0.249801	0.99525	0.535891	0.246463
