# Supplementary material for: Knockout CsRBOH5.1 causes global decrease of H3K4me3 on genes during recovery after cold stress acclimation, leading to acclimation failure
Source: Research Square preprint supplement (doi:10.21203/rs.3.rs-3226653/v1), 2023-08-03
Supplement: Supplementary file 19 [file Extended Data Table 7.xlsx]

## Sheet: Table 7a
Table 7a The information of primers used for CRISPR-Cas9 vectors construction and for analysis of target gene mutations
Primers for CRISPR-Cas9 vectors construction	CsRBOH5-sgRNA-F	cagtggtctcaattgGCCGCACTGGATTCTGTTCC
	CsRBOH5-sgRNA-R	cagtggtctca aaacGGAACAGAATCCAGTGCGGC
	U626-ID-F	TGTCCCAGGATTAGAATGATTAGGC
Primers for analysis of target gene mutations	CsRBOH5-F	CGCCGAAGCACGAACGG
	CsRBOH5-R	CAGCCAAGGCGGAGTCAAAT

## Sheet: Table 7b
Table 7b Medium formulations for the transformation of cucumber
Media	concentration	GM	IM	COM	SIM	SEM	RIM
		germination	inoculation	co-cultivation	shoot induction	shoot elongation	root induction
		medium	medium	medium	medium	medium	medium
MS medium	4.43 g·L-1	+	+	+	+	+	0.5
sucrose	0.03	+	+	+	+	+	0.5
6-BA	2 mg·L-1	+	+	+	+	+	-
ABA	1 mg·L-1	+	+	+	+	+	-
AS	200 µM	-	+	+	-	-	-
MES	2 mM	-	+	+	-	-	-
TMT	200 mg·L-1	-	-	-	+	-	-
TMT	100 mg·L-1	-	-	-	-	+	+
pH	5.6-5.8	+	+	+	+	+	+
Phytagel	Gelzan	+	-	+	+	+	0.5
